# Supplementary material for: Identification of hydatidosis-related modules and key regulatory genes
Source: PeerJ. 2020 Jun 18;8:e9280. doi: 10.7717/peerj.9280 (PMC7306218; doi:10.7717/peerj.9280)
Supplement: Supplemental Information 1 [file peerj-08-9280-s001.xlsx]

## Sheet: Sheet1
Table S1.Differential Genes in Dogs First Infected with Hydatidosis
Symbol	F	N	FC	logFC	p.value
A2LD1	1.38	1.37	1.0073	0.0104924	0.00231497
A4GNT	-4.89	-5.01	0.976048	-0.0349761	0.00771623
AADACL2	-7.51	-7.35	1.02177	0.0310687	0.00685432
AADACL4	-7.78	-7.56	1.0291	0.0413839	0.00912951
AARS2	-4.14	-4.09	1.01222	0.0175299	0.00386763
ABCA9	-6.29	-6.2	1.01452	0.0207918	0.00458725
ABCD2	-7.82	-7.61	1.0276	0.0392722	0.00866377
ABCG4	-7.87	-7.68	1.02474	0.0352573	0.00777825
ABHD10	-4.24	-4.35	0.974713	-0.0369511	0.00815184
ABHD12B	-4.285	-4.4	0.973864	-0.0382083	0.00842913
ABL2	-2.76	-2.77	0.99639	-0.00521771	0.00115121
ABP1	6.59	6.75	0.976296	-0.034609	0.00763525
ABRA	-6.70667	-6.78667	0.988212	-0.0171073	0.00377438
ACCN5	-7.54	-7.67	0.983051	-0.0246621	0.00544106
ACMSD	-7.825	-7.63	1.02556	0.0364077	0.00803198
ACOT12	-7.79	-7.6	1.025	0.0356239	0.0078591
ACOT7	2.35	2.34	1.00427	0.00615223	0.0013574
ACP2	-2.72	-2.78	0.978417	-0.0314782	0.00694467
ACR	-7.75	-7.52	1.03059	0.0434636	0.00958818
ACSL6	-7.805	-7.61	1.02562	0.0365022	0.00805282
ACSM3	-7.72	-7.545	1.02319	0.0330799	0.00729797
ACTL6B	-7.68	-7.49	1.02537	0.0361406	0.00797307
ACTR1A	5.02	5.06	0.992095	-0.01145	0.00252626
ACVR2B	-2.9	-2.94	0.986395	-0.0197633	0.00436034
ADAM18	-7.73	-7.5	1.03067	0.0435778	0.00961336
ADAM21	-7.74	-7.56	1.02381	0.0339473	0.0074893
ADAM32	-7.435	-7.315	1.0164	0.0234749	0.00517917
ADAMTS16	-7	-6.88	1.01744	0.0249464	0.00550378
ADAMTS20	-6.47	-6.36	1.0173	0.0247389	0.00545802
ADAMTSL3	-7.73	-7.55	1.02384	0.0339918	0.0074991
ADAT3	-2.57	-2.62	0.980916	-0.0277985	0.00613295
ADCY10	-7.85	-7.64	1.02749	0.03912	0.00863021
ADCY3	-6.2	-6.33	0.979463	-0.0299373	0.00660476
ADCY8	-5.06	-5.01	1.00998	0.0143268	0.00316095
ADRM1	4.09	4.14	0.987923	-0.0175299	0.00386763
AGAP2	-7.43	-7.28	1.0206	0.0294238	0.00649148
AGBL1	-5.175	-5.04	1.02679	0.0381351	0.00841299
AGK	-4.15	-4.25	0.976471	-0.0343515	0.00757845
AGPHD1	-5.25	-5.37667	0.976441	-0.0343946	0.00758796
AGRP	-7.18	-7.09	1.01269	0.0181982	0.00401507
AGTR1	-7.48	-7.26	1.0303	0.0430687	0.00950108
AGXT	-4.745	-4.675	1.01497	0.0214417	0.00473063
AIFM1	2.13333	2.07333	1.02894	0.0411573	0.00907954
AIFM3	-7.76	-7.52	1.03191	0.045324	0.00999844
AK5	-3.29	-3.21	1.02492	0.0355143	0.00783492
AKAP4	-5.33	-5.18	1.02896	0.0411834	0.0090853
AKAP8	-1.85	-1.875	0.986667	-0.0193653	0.00427255
AKR1D1	-6.82	-6.86	0.994169	-0.00843684	0.00186146
AKR7A2	1.775	1.755	1.0114	0.016348	0.00360687
ALAD	2.74	2.77	0.98917	-0.0157101	0.00346614
ALDH18A1	0.963333	0.94	1.02482	0.0353743	0.00780405
ALDH1A2	-6.05	-6.23	0.971108	-0.042297	0.00933089
ALDH5A1	2.11	2.13	0.99061	-0.0136104	0.0030029
ALG10	-3.57	-3.655	0.976744	-0.0339473	0.0074893
ALK	-6.36	-6.24	1.01923	0.0274807	0.00606286
ALLC	-7.5	-7.34	1.0218	0.0311105	0.00686356
ALPK3	-7.79	-7.59	1.02635	0.0375234	0.00827807
ALPL	-5.09	-5.18	0.982625	-0.0252864	0.0055788
AMIGO1	-7.55	-7.33	1.03001	0.0426634	0.0094117
AMMECR1	-5.22	-5.27	0.990512	-0.0137532	0.00303439
AMPD2	-2.51333	-2.46	1.02168	0.0309437	0.00682676
AMPD3	-4.62	-4.625	0.998919	-0.00156051	0.000344305
AMTN	-7.71	-7.53	1.0239	0.034081	0.00751878
AMZ1	-7.84	-7.66	1.0235	0.0335093	0.00739267
ANGPTL1	-5.83333	-5.66	1.03062	0.0435185	0.00960027
ANK1	-5.81	-5.67	1.02469	0.0351894	0.00776327
ANKDD1A	-3.07	-2.98	1.0302	0.0429263	0.00946968
ANKFY1	-3.37	-3.46	0.973988	-0.0380234	0.00838835
ANKMY1	-7.12	-6.98	1.02006	0.0286502	0.00632084
ANKRD29	-2.65	-2.62	1.01145	0.0164255	0.00362398
ANKRD33B	-7.68	-7.5	1.024	0.0342157	0.0075485
ANKRD60	-7.8	-7.58	1.02902	0.0412763	0.00910577
ANKZF1	-2.9	-2.895	1.00173	0.00248955	0.000549284
ANO1	-7.72	-7.54	1.02387	0.0340363	0.00750893
ANO4	-7.51	-7.35	1.02177	0.0310687	0.00685432
ANXA11	5.75	5.72	1.00524	0.00754681	0.00166509
ANXA13	4.97	5.09	0.976424	-0.0344198	0.00759351
AOAH	0.6	0.61	0.983607	-0.0238467	0.0052612
AOH2	-7.73	-7.54	1.0252	0.0359039	0.00792086
AP3M2	-7.86	-7.68	1.02344	0.033423	0.00737364
API5	-2.05333	-2.03333	1.00984	0.0141211	0.00311557
APITD1	-7.42	-7.2	1.03056	0.0434223	0.00957905
APLP2	2.65	2.60667	1.01662	0.0237863	0.00524786
APOBEC2	-7.35	-7.22	1.01801	0.0257454	0.00568005
APOH	-4.145	-4.155	0.997593	-0.00347637	0.000767011
APOLD1	-7.8	-7.62	1.02362	0.0336831	0.00743102
AQP4	-7.68	-7.5	1.024	0.0342157	0.0075485
AQP6	-7.86	-7.67	1.02477	0.0353027	0.00778826
AR	-2.545	-2.59	0.982625	-0.0252864	0.0055788
ARHGAP10	2.7	2.73	0.989011	-0.0159415	0.0035172
ARHGAP18	-1.03	-1.05	0.980952	-0.027745	0.00612116
ARHGAP36	-7.505	-7.305	1.02738	0.0389678	0.00859664
ARHGEF10L	-5.565	-5.715	0.973753	-0.0383718	0.00846519
ARHGEF26	-4.63	-4.57	1.01313	0.018818	0.00415181
ARHGEF4	-7.65	-7.48	1.02273	0.0324215	0.00715273
ARHGEF6	-4.84	-4.91	0.985743	-0.020716	0.00457052
ARID4A	-3.82	-3.94	0.969543	-0.044623	0.00984385
ARL13B	-3.085	-3.11	0.991961	-0.0116441	0.00256907
ARL6IP6	-2.71	-2.72	0.996324	-0.0053138	0.00117241
ARMC3	-7.73667	-7.55333	1.02427	0.0345987	0.00763296
ARMC6	-2.72	-2.67	1.01873	0.0267669	0.00590539
ARMC7	-4.69	-4.56	1.02851	0.0405541	0.0089465
ARMCX3	1.21	1.19	1.01681	0.0240455	0.00530504
ARPC2	6.18	6.31	0.979398	-0.0300332	0.00662591
ARPC3	5.64	5.72	0.986014	-0.02032	0.00448316
ARRDC2	-3.46	-3.42	1.0117	0.0167757	0.00370124
ARSI	-7.53	-7.48	1.00668	0.0096116	0.00212064
AS3MT	2.81	2.87	0.979094	-0.0304806	0.00672461
ASB13	-3.78	-3.82	0.989529	-0.0151864	0.0033506
ASB14	-7.81	-7.63	1.02359	0.0336395	0.0074214
ASB3	-2.12	-2.16	0.981481	-0.026967	0.00594954
ASB8	-0.73	-0.72	1.01389	0.0198996	0.00439041
ASCC3	-2.66	-2.69	0.988848	-0.0161799	0.00356979
ASH1L	-2.43	-2.39667	1.01391	0.019927	0.00439648
ASIP	-7.8	-7.6	1.02632	0.0374747	0.00826732
ASTE1	-1.85	-1.89	0.978836	-0.030861	0.00680851
ASTL	-6.56	-6.6	0.993939	-0.00877021	0.00193501
ASTN1	-5.96	-5.95	1.00168	0.00242266	0.000534525
ASZ1	-7.82	-7.63	1.0249	0.0354855	0.00782859
ATE1	-1.38	-1.4	0.985714	-0.0207586	0.00457992
ATF4	4.68667	4.64667	1.00861	0.012366	0.00272835
ATF7IP2	-7.27	-7.16	1.01536	0.0219958	0.00485286
ATG3	5.04	5.2	0.969231	-0.0450879	0.00994637
ATP1B2	-6.74	-6.63	1.01659	0.0237397	0.00523759
ATP2B3	-5.22	-5.11	1.02153	0.0307265	0.00677885
ATP4B	-7.84	-7.64	1.02618	0.037281	0.0082246
ATP5SL	-2.625	-2.575	1.01942	0.027745	0.00612116
ATP6V0A2	-2.3	-2.27	1.01322	0.0189416	0.00417906
ATP6V0D1	1.89	1.88333	1.00354	0.00509787	0.00112477
ATP6V0D2	-7.8	-7.61	1.02497	0.0355777	0.00784891
ATP6V1B1	-7.8	-7.58	1.02902	0.0412763	0.00910577
ATP6V1B2	1.68667	1.67667	1.00596	0.00857899	0.00189282
ATP6V1C2	-4.53667	-4.51667	1.00443	0.00637421	0.00140637
ATP6V1E2	-4.98	-4.94	1.0081	0.0116347	0.002567
ATP8B4	-4.82	-4.81	1.00208	0.00299625	0.000661079
ATR	-3.22	-3.28	0.981707	-0.0266351	0.00587632
ATRNL1	-4.99	-5.14	0.970817	-0.0427285	0.00942606
AUP1	1.36	1.38	0.985507	-0.0210616	0.00464678
AVP	-5.11	-5.155	0.991271	-0.0126491	0.00279081
AXIN1	-2.38	-2.395	0.993737	-0.00906408	0.00199985
B3GALT1	-7.77	-7.58	1.02507	0.0357167	0.00787958
B3GNT9	-5.27	-5.12	1.0293	0.0416592	0.00919021
B3GNTL1	-5.7	-5.62	1.01423	0.0203918	0.004499
B4GALNT3	-5.77	-5.68	1.01585	0.0226804	0.0050039
BAALC	-7.39	-7.17	1.03068	0.0436012	0.00961852
BCAM	-4.52	-4.54	0.995595	-0.00636953	0.00140534
BCAS3	-4.05	-3.93	1.03053	0.0433926	0.00957251
BCL6B	-6.13	-6.21	0.987118	-0.0187062	0.00412714
BCL7B	-2.46	-2.52	0.97619	-0.0347654	0.00766975
BCL9	-2.86	-2.83	1.0106	0.0152131	0.00335649
BCLAF1	1.18	1.214	0.971993	-0.0409816	0.00904078
BCOR	-3.69	-3.68	1.00272	0.00391505	0.000863798
BEST1	-7.64	-7.46	1.02413	0.034397	0.00758849
BET1	4.4	4.41	0.997732	-0.00327513	0.00072261
BET3L	-7.34	-7.37	0.995929	-0.00588456	0.00129834
BIN1	1.85	1.83	1.01093	0.0156816	0.00345986
BMI1	-1.52	-1.5	1.01333	0.0191088	0.00421596
BMP15	-7.82	-7.64	1.02356	0.033596	0.0074118
BPIL1	-6.76	-6.56	1.03049	0.0433274	0.00955814
BPIL3	-7.79	-7.61	1.02365	0.0337269	0.00744067
BPTF	2.61	2.66	0.981203	-0.0273764	0.00603985
BRD1	-4.37	-4.28	1.02103	0.0300225	0.00662355
BRD7	2.94	2.93	1.00341	0.00491549	0.00108453
BRI3	-2.83	-2.845	0.994728	-0.0076266	0.00168269
BRP44L	4.0325	3.915	1.03001	0.0426622	0.00941143
BSCL2	1.94667	1.92	1.01389	0.0198996	0.00439041
BTBD1	-1.21	-1.175	1.02979	0.0423463	0.00934176
BTBD10	-1.78333	-1.81	0.985267	-0.0214133	0.00472436
C1QL3	-7.775	-7.595	1.0237	0.0337927	0.00745519
C1QL4	-1.96	-1.99	0.984925	-0.0219148	0.00483499
C1QTNF1	-4.5125	-4.4075	1.02382	0.0339664	0.0074935
C1QTNF4	-2.73	-2.74	0.99635	-0.00527494	0.00116384
C1QTNF9	-4.05	-3.99	1.01504	0.0215332	0.00475081
C7	-4.435	-4.465	0.993281	-0.00972607	0.0021459
C8A	-7.59	-7.5	1.012	0.0172093	0.00379689
C9	-7.79	-7.6	1.025	0.0356239	0.0078591
CA14	1.565	1.575	0.993651	-0.00918917	0.00202744
CABIN1	-1.30667	-1.28667	1.01554	0.0222528	0.00490957
CABP4	-7.87	-7.68	1.02474	0.0352573	0.00777825
CACNA2D3	-7.14333	-7.05333	1.01276	0.0182922	0.00403581
CACNA2D4	-7.77	-7.53	1.03187	0.0452647	0.00998537
CACNB2	-7.8	-7.63	1.02228	0.0317911	0.00701367
CADPS	-4.03	-4.04	0.997525	-0.00357545	0.000788872
CAFA-T2R1	-4.49	-4.45	1.00899	0.0129101	0.00284839
CAFA-T2R3	-7.7	-7.51	1.0253	0.0360455	0.0079521
CAFA-T2R38	-7.74	-7.56	1.02381	0.0339473	0.0074893
CAFA-T2R43	-7.78	-7.58	1.02639	0.0375723	0.00828885
CAFA-T2R5	-7.62	-7.44	1.02419	0.0344884	0.00760864
CAFA-T2R67	-7.83	-7.65	1.02353	0.0335526	0.00740222
CALHM3	-6.15	-6.07	1.01318	0.0188899	0.00416766
CALM1	6.47	6.41	1.00936	0.0134414	0.0029656
CALM3	4.3875	4.3775	1.00228	0.00329195	0.00072632
CALR3	-6.46	-6.35	1.01732	0.0247776	0.00546655
CAMK1G	-7.83	-7.65	1.02353	0.0335526	0.00740222
CAMKK1	-5.65	-5.67	0.996473	-0.00509787	0.00112477
CAMKV	-7.5	-7.29	1.02881	0.0409718	0.00903862
CAPZA3	-7.58	-7.41	1.02294	0.0327243	0.00721953
CARKD	-4.05	-4.17	0.971223	-0.0421255	0.00929306
CASKIN1	-7.84	-7.66	1.0235	0.0335093	0.00739267
CASQ2	-7.82	-7.605	1.02827	0.0402204	0.00887289
CATSPER1	-7.56	-7.38	1.02439	0.0347654	0.00766975
CATSPER3	-7.18	-7.39	0.971583	-0.0415905	0.00917508
CATSPERB	-7.79	-7.56	1.03042	0.0432371	0.00953821
CBY3	-7.53	-7.36	1.0231	0.0329441	0.00726801
CCDC102B	-7.8	-7.62	1.02362	0.0336831	0.00743102
CCDC103	-5.81	-5.67	1.02469	0.0351894	0.00776327
CCDC114	-7.67	-7.48	1.0254	0.0361883	0.00798359
CCDC147	-7.64	-7.445	1.02619	0.0373008	0.00822897
CCDC160	-7.61	-7.4	1.02838	0.0403712	0.00890616
CCDC19	-7.72	-7.53	1.02523	0.035951	0.00793125
CCDC22	1.19	1.22	0.97541	-0.0359196	0.00792432
CCDC30	-5.635	-5.665	0.994704	-0.00766035	0.00169014
CCDC38	-7.83	-7.64	1.02487	0.0354397	0.00781847
CCDC60	-7.76	-7.58	1.02375	0.0338588	0.00746977
CCDC63	-5.08	-5.07	1.00197	0.00284275	0.000627211
CCDC67	-7.39	-7.31	1.01094	0.015703	0.00346456
CCDC7	-7.86	-7.67	1.02477	0.0353027	0.00778826
CCDC70	-7.78	-7.55	1.03046	0.0432935	0.00955066
CCDC73	-7.56	-7.39	1.023	0.0328119	0.00723884
CCDC75	-4	-3.93	1.01781	0.0254707	0.00561945
CCDC79	-7.81	-7.63	1.02359	0.0336395	0.0074214
CCDC89	-7.85	-7.64	1.02749	0.03912	0.00863021
CCDC94	-7.52	-7.35	1.02313	0.0329884	0.00727778
CCDC97	-5.06	-5.065	0.999013	-0.00142488	0.00031438
CCL25	6.47	6.62	0.977341	-0.0330655	0.00729479
CCL7	-7.48	-7.57	0.988111	-0.017255	0.00380698
CCNA1	-7.79	-7.62	1.02231	0.0318323	0.00702278
CCNG1	1.47333	1.49333	0.986607	-0.0194524	0.00429175
CCNI	2.7	2.74	0.985401	-0.0212165	0.00468094
CCR7	-7.55	-7.38	1.02304	0.0328558	0.00724854
CCT8L2	-7.75	-7.52	1.03059	0.0434636	0.00958818
CD164	1.735	1.785	0.971989	-0.0409884	0.00904229
CD1B	-4.74	-4.83333	0.98069	-0.0281314	0.0062064
CD6	-4.17	-4.22	0.988152	-0.0171956	0.00379388
CD63	6.58	6.61	0.995461	-0.00656269	0.00144796
CDC23	-5.16	-5.19667	0.992944	-0.0102155	0.00225387
CDC25A	-5.29	-5.2	1.01731	0.0247561	0.00546181
CDC40	-3.27	-3.17	1.03155	0.0448078	0.00988461
CDC42EP2	-5.26	-5.3	0.992453	-0.0109296	0.00241143
CDH2	-5.05	-5.135	0.983447	-0.0240809	0.00531285
CDH6	-5.96	-5.91	1.00846	0.0121542	0.00268162
CDH8	-7.83	-7.65	1.02353	0.0335526	0.00740222
CDHR3	-7.8	-7.58	1.02902	0.0412763	0.00910577
CDK10	-2.3	-2.25	1.02222	0.0317089	0.00699554
CDKL1	-7.55	-7.39	1.02165	0.0309023	0.00681762
CDKL3	-7.68	-7.5	1.024	0.0342157	0.0075485
CDX4	-7.87	-7.69	1.02341	0.03338	0.00736417
CELSR1	-4.38	-4.25	1.03059	0.043468	0.00958914
CENPQ	-5.33	-5.28	1.00947	0.0135976	0.00300007
CEP192	-3.08	-3.1	0.993548	-0.00933787	0.00206025
CfOLF1	-7.745	-7.56	1.02447	0.034879	0.0076948
CGA	-5.55	-5.61	0.989305	-0.015513	0.00342265
CGGBP1	2.26	2.255	1.00222	0.00319534	0.000705005
CHADL	-3.44	-3.43	1.00292	0.00419999	0.000926666
CHAT	-7.42	-7.27	1.02063	0.0294638	0.00650032
CHCHD2	-7.42	-7.28	1.01923	0.0274807	0.00606286
CHCHD5	1.47	1.51	0.97351	-0.0387324	0.00854472
CHEK2	-2.235	-2.265	0.986755	-0.0192362	0.00424407
CHI3L1	-7.4	-7.26	1.01928	0.0275557	0.0060794
CHIA	-7.52	-7.3	1.03014	0.0428362	0.0094498
CHODL	-7.72	-7.53	1.02523	0.035951	0.00793125
CHRM5	-7.54	-7.33	1.02865	0.0407513	0.00899
CHRNA3	-7.86	-7.68	1.02344	0.033423	0.00737364
CHRNB1	-2.63	-2.7	0.974074	-0.0378966	0.00836038
CHRND	-7.86	-7.66	1.02611	0.0371849	0.00820341
CHST9	-7.8	-7.63	1.02228	0.0317911	0.00701367
CHTF8	-1.655	-1.625	1.01846	0.0263915	0.00582258
CIB3	-7.52	-7.44	1.01075	0.01543	0.00340435
CILP	-7.83	-7.63	1.02621	0.0373293	0.00823524
CLASP2	-2.90667	-2.88667	1.00693	0.00996111	0.00219776
CLCN7	-1.98	-1.97	1.00508	0.0073048	0.00161169
CLDN18	-7.44	-7.49	0.993324	-0.0096631	0.00213201
CLDN2	-5.355	-5.35	1.00093	0.00134768	0.000297347
CLEC3A	-7.74	-7.55	1.02517	0.0358569	0.0079105
CLEC4G	-7.62	-7.39	1.03112	0.0442166	0.00975424
CLIC3	-3.4	-3.35	1.01493	0.0213737	0.00471562
CLIC6	-6.34	-6.29	1.00795	0.0114228	0.00252026
CLOCK	-4.05	-4.07	0.995086	-0.00710689	0.00156803
CLPS	-2.215	-2.15	1.03023	0.04297	0.00947932
CLTA	5.175	5.0375	1.0273	0.0388509	0.00857086
CLTC	1.37333	1.41333	0.971698	-0.0414199	0.00913746
CLUL1	-7.75	-7.58	1.02243	0.0319985	0.00705942
CLVS2	-7.8	-7.58	1.02902	0.0412763	0.00910577
CMTM1	-7.74	-7.53	1.02789	0.0396837	0.00875453
CNDP2	7.86	8.11	0.969174	-0.0451726	0.00996506
CNGA2	-7.88	-7.69	1.02471	0.035212	0.00776826
CNGA3	-7.88	-7.69	1.02471	0.035212	0.00776826
CNGA4	-7.83	-7.62	1.02756	0.0392213	0.00865255
CNGB3	-7.82	-7.64	1.02356	0.033596	0.0074118
CNKSR2	-7.59	-7.42	1.02291	0.0326807	0.00720991
CNR2	-7.01	-7.17	0.977685	-0.0325587	0.00718299
CNTN3	-7.76	-7.59	1.0224	0.0319568	0.00705022
CNTNAP5	-7.54	-7.35	1.02585	0.0368203	0.00812298
COASY	2.46	2.48	0.991935	-0.0116818	0.00257739
COL2A1	-6.13333	-6.04	1.01545	0.0221228	0.00488089
COL4A4	-5.24	-5.19	1.00963	0.0138323	0.00305185
COLEC12	-2.44	-2.48	0.983871	-0.023459	0.00517566
COMTD1	4.01	3.93	1.02036	0.0290729	0.00641409
cOR10A9	-7.36	-7.14	1.03081	0.0437817	0.00965832
cOR10Q3	-7.33	-7.2	1.01806	0.0258163	0.00569569
cOR11J4	-7.87	-7.69	1.02341	0.03338	0.00736417
cOR1AF1	-7.81	-7.61	1.02628	0.0374261	0.0082566
cOR51C4	-7.87	-7.67	1.02608	0.0371371	0.00819285
cOR51H3	-7.86	-7.68	1.02344	0.033423	0.00737364
cOR51H5	-7.7	-7.52	1.02394	0.0341258	0.00752866
cOR51K1P	-7.77	-7.54	1.0305	0.0433501	0.00956313
cOR51P3	-7.77	-7.55	1.02914	0.041438	0.00914143
cOR51R2	-5.17	-5.03	1.02783	0.0396059	0.00873737
cOR52A17	-7.75	-7.52	1.03059	0.0434636	0.00958818
cOR52AB4	-7.81	-7.59	1.02899	0.0412227	0.00909395
cOR52E9	-7.77	-7.59	1.02372	0.0338147	0.00746005
cOR52H8	-7.58	-7.36	1.02989	0.0424921	0.00937391
cOR52J5	-6.12	-6.25	0.9792	-0.0303245	0.00669018
cOR52M5	-7.76	-7.57	1.0251	0.0357634	0.00788986
cOR52N8	-6.13	-5.95	1.03025	0.0429974	0.00948535
cOR52P2P	-7.84	-7.66	1.0235	0.0335093	0.00739267
cOR52Z4	-7.55	-7.37	1.02442	0.034812	0.00768003
cOR56A20	-4.43	-4.42	1.00226	0.00326033	0.000719344
cOR56B6	-7.88	-7.7	1.02338	0.0333372	0.00735472
cOR5AN3	-5.99	-6.065	0.987634	-0.0179516	0.00396067
cOR5M13P	-7.81	-7.62	1.02493	0.0355316	0.00783873
cOR6C63	-7.82	-7.64	1.02356	0.033596	0.0074118
cOR6M4	-7.75	-7.56	1.02513	0.0358101	0.00790017
cOR6M5	-7.8	-7.61	1.02497	0.0355777	0.00784891
cOR9A7	-7.79	-7.56	1.03042	0.0432371	0.00953821
cOR9K6	-7.33	-7.21	1.01664	0.0238139	0.00525396
cOR9R4	-7.76	-7.57	1.0251	0.0357634	0.00788986
CPA1	-7.63	-7.45	1.02416	0.0344426	0.00759855
CPA4	-5.63	-5.62	1.00178	0.00256479	0.000565884
CPA6	-7.6	-7.43	1.02288	0.0326372	0.00720032
CPB1	-6.565	-6.73	0.975483	-0.0358115	0.00790048
CPLX2	-6.68	-6.71	0.995529	-0.00646466	0.00142633
CPNE4	-7.56	-7.4	1.02162	0.030861	0.00680851
CPS1	-2.92	-2.99	0.976589	-0.0341771	0.00753998
CPSF7	-1.41667	-1.40667	1.00711	0.0102198	0.00225484
CRADD	-3.5	-3.61	0.969529	-0.0446439	0.00984847
CREB1	-0.94	-0.93	1.01075	0.01543	0.00340435
CREB3L1	-7.72	-7.54	1.02387	0.0340363	0.00750893
CRH	-4.00333	-3.94	1.01607	0.0230061	0.00507575
CRHBP	-7.77	-7.58	1.02507	0.0357167	0.00787958
CRISP2	-5.7	-5.57	1.02334	0.0332846	0.00734311
CRSP-2	-3.9	-3.8	1.02632	0.0374747	0.00826732
CRYM	-3.64	-3.69	0.98645	-0.0196824	0.0043425
CSGALNACT1	-3.34	-3.43	0.973761	-0.0383605	0.00846269
CSNK2A2	1.28	1.32	0.969697	-0.0443941	0.00979338
CST11	-7.25	-7.29	0.994513	-0.00793782	0.00175136
CST9L	-5	-5.03	0.994036	-0.0086303	0.00190414
CTCFL	-7.82	-7.62	1.02625	0.0373776	0.00824591
CTNNA1	-7.79	-7.61	1.02365	0.0337269	0.00744067
CTSO	-2.43	-2.5	0.972	-0.0409718	0.00903862
CTSZ	4.56	4.62	0.987013	-0.018859	0.00416085
CWC22	1.31	1.27	1.0315	0.0447383	0.00986928
CWC25	-1.07	-1.045	1.02392	0.0341079	0.00752471
CWH43	-7.84	-7.65	1.02484	0.0353939	0.00780837
CXCR3	-3.29	-3.19	1.03135	0.0445312	0.0098236
CXCR5	-4.46	-4.41	1.01134	0.0162651	0.00358857
CYB5A	4.605	4.655	0.989259	-0.01558	0.00343744
CYP2E1	-7.75	-7.545	1.02717	0.0386754	0.00853215
CYP4A38	-7.79	-7.59	1.02635	0.0375234	0.00827807
CYSLTR2	-4.09	-4.03	1.01489	0.021321	0.004704
CYTL1	-7.75	-7.56	1.02513	0.0358101	0.00790017
D2HGDH	1.35	1.33	1.01504	0.0215332	0.00475081
DAG1	-2.17	-2.23	0.973094	-0.0393487	0.00868064
DARS2	-2.9	-2.83	1.02473	0.0352508	0.00777682
DBNL	2.35	2.4	0.979167	-0.0303736	0.00670101
DCAF10	-1.31	-1.3	1.00769	0.0110552	0.00243914
DCAF8L2	-7.77	-7.59	1.02372	0.0338147	0.00746005
DCDC5	-7.6	-7.37	1.03121	0.0443348	0.0097803
DCHS2	-5.9	-6.06	0.973597	-0.0386028	0.00851614
DCLK1	-7.59	-7.39	1.02706	0.0385255	0.00849909
DCST2	-7.74	-7.56	1.02381	0.0339473	0.0074893
DCUN1D5	-1.8	-1.79	1.00559	0.00803732	0.00177331
DDB1	-2.0625	-2.11	0.977488	-0.0328489	0.00724701
DDI1	-7.81	-7.63	1.02359	0.0336395	0.0074214
DDX18	-2.79	-2.87	0.972125	-0.0407856	0.00899756
DDX20	-2.51667	-2.46667	1.02027	0.0289514	0.00638728
DDX25	-5	-5.09333	0.981675	-0.026682	0.00588667
DDX43	-7.47	-7.32	1.02049	0.0292646	0.00645637
DECR1	2.47333	2.46	1.00542	0.00779837	0.00172059
DEFB105A	-7.86	-7.67	1.02477	0.0353027	0.00778826
DEFB127	-6.135	-6.165	0.995134	-0.00703755	0.00155273
DEK	2.68	2.655	1.00942	0.0135211	0.0029832
DERL1	1.58	1.55	1.01935	0.0276563	0.0061016
DFNB31	-7.36	-7.23	1.01798	0.0257101	0.00567227
DGKB	-7.53	-7.3	1.03151	0.0447534	0.00987261
DGKG	-4.83	-4.8	1.00625	0.00898878	0.00198323
DGKI	-7.81	-7.63	1.02359	0.0336395	0.0074214
DGKK	-7.84	-7.66	1.0235	0.0335093	0.00739267
DHRS3	0.76	0.75	1.01333	0.0191088	0.00421596
DHX8	-2.75	-2.69	1.0223	0.0318254	0.00702126
DISC1	-4.48	-4.39	1.0205	0.0292778	0.00645928
DLGAP2	-7.63	-7.4	1.03108	0.0441578	0.00974126
DLK1	-7.21	-7.1	1.01549	0.0221802	0.00489356
DMAP1	4.83	4.88	0.989754	-0.014858	0.00327814
DMGDH	-5.03	-5.11	0.984344	-0.0227649	0.00502254
DMPK	-6.41	-6.595	0.971948	-0.0410483	0.0090555
DMRT1	-7.74	-7.51	1.03063	0.0435207	0.00960075
DMXL2	-6.5	-6.56	0.990854	-0.0132561	0.00292473
DNAH12	-4.63	-4.6	1.00652	0.00937833	0.00206918
DNAH6	-7.69	-7.51	1.02397	0.0341707	0.00753857
DNAH7	-7.85	-7.67	1.02347	0.0334661	0.00738315
DNAH8	-5.76	-5.625	1.024	0.0342157	0.0075485
DNAJC17	-1.84	-1.83	1.00546	0.00786212	0.00173465
DNAJC3	2.965	2.905	1.02065	0.0294939	0.00650696
DNAJC30	-1.62	-1.65	0.981818	-0.0264722	0.00584038
DNAJC5B	-7.77	-7.59	1.02372	0.0338147	0.00746005
DNAJC6	-7.37	-7.24	1.01796	0.0256749	0.0056645
DNTTIP1	2.97333	3.02667	0.982379	-0.0256486	0.00565869
DOK6	-5.07	-5.13	0.988304	-0.0169731	0.00374478
DONSON	-3.49	-3.405	1.02496	0.0355722	0.00784771
DPYS	-6.13	-5.95333	1.02968	0.0421894	0.00930716
DPYSL2	-5.19	-5.2	0.998077	-0.00277708	0.000612723
DRD5	-7.83	-7.62	1.02756	0.0392213	0.00865255
DSC1	-7.77	-7.6	1.02237	0.0319152	0.00704105
DSCAM	-4.89	-4.76	1.02731	0.0388729	0.00857571
DSG4	-7.34	-7.48	0.981283	-0.0272582	0.00601377
DUOXA1	-4.89	-4.86	1.00617	0.00887815	0.00195882
DUSP7	-4.945	-4.895	1.01021	0.0146617	0.00323483
DUXA	-7.87	-7.69	1.02341	0.03338	0.00736417
DVL3	0.94	0.95	0.989474	-0.0152668	0.00336833
E2F1	-3.07	-3.09	0.993528	-0.00936818	0.00206694
ECE2	-3.92	-3.98	0.984925	-0.0219148	0.00483499
ECHS1	5.235	5.4	0.969444	-0.0447699	0.00987624
EEF1B2	-4.78	-4.64	1.03017	0.0428858	0.00946074
EFCAB1	-6.3	-6.19333	1.01722	0.0246357	0.00543526
EFCAB6	-7.61	-7.38	1.03117	0.0442756	0.00976725
EFCAB9	-7.29	-7.17	1.01674	0.0239457	0.00528303
EFHB	-7.84	-7.63	1.02752	0.0391706	0.00864137
EFHC2	-3.71	-3.76	0.986702	-0.0193135	0.00426111
EFNA4	-1.25	-1.24	1.00806	0.011588	0.00255669
EFNA5	-7.79	-7.58	1.0277	0.0394255	0.00869758
EFNB3	-5.32	-5.43	0.979742	-0.029526	0.00651402
EGFL6	-7.8	-7.61	1.02497	0.0355777	0.00784891
EGFR	-3.18	-3.2075	0.991426	-0.0124225	0.00274081
EIF5A2	-3.27	-3.29	0.993921	-0.00879695	0.00194091
ELAVL3	-6.21	-6.34	0.979495	-0.0298896	0.00659423
ELK1	-3.9	-3.96	0.984848	-0.0220263	0.0048596
ELMOD1	-7.59	-7.6	0.998684	-0.00189953	0.000419104
ELOVL7	-4.56	-4.63	0.984881	-0.0219784	0.00484902
EML6	-7.88	-7.69	1.02471	0.035212	0.00776826
ENAM	-7.88	-7.69	1.02471	0.035212	0.00776826
ENDOD1	-3.64	-3.62	1.00552	0.00794875	0.00175377
ENKUR	-5.65333	-5.74667	0.983759	-0.0236236	0.00521198
ENO1	4.255	4.325	0.983815	-0.023541	0.00519375
ENTPD1	-3.33	-3.35	0.99403	-0.00863892	0.00190604
EOMES	-6.32	-6.13	1.031	0.0440375	0.00971473
EPB42	-7.41	-7.19	1.0306	0.0434818	0.00959217
EPHA4	-6.26	-6.21	1.00805	0.0115694	0.00255259
EPHA7	-7.68	-7.49	1.02537	0.0361406	0.00797307
EPM2AIP1	-3.99	-4.02	0.992537	-0.0108068	0.00238433
EPO	-6.92	-6.78	1.02065	0.0294868	0.00650538
EPS15	0.432	0.428	1.00935	0.0134205	0.002961
EPYC	-7.77	-7.59	1.02372	0.0338147	0.00746005
ERBB4	-7.85	-7.64	1.02749	0.03912	0.00863021
ESAM	-7.58	-7.41	1.02294	0.0327243	0.00721953
ESR1	-7.2	-7.1	1.01408	0.0201779	0.00445181
ESR2	-6.635	-6.785	0.977892	-0.0322523	0.00711542
ETV1	-2.08	-2.14	0.971963	-0.0410273	0.00905086
EVI2B	-1.06	-1.07	0.990654	-0.0135465	0.0029888
EVI5L	-7.87	-7.67	1.02608	0.0371371	0.00819285
EVL	-4.29	-4.39	0.977221	-0.0332433	0.007334
EXOSC10	-2.14667	-2.19333	0.978723	-0.0310269	0.00684511
EXT1	1.53	1.5	1.02	0.0285692	0.00630296
EXTL1	-6.11	-5.97	1.02345	0.0334414	0.00737771
EYA1	-7.52	-7.36	1.02174	0.0310269	0.00684511
EYS	-7.72	-7.54	1.02387	0.0340363	0.00750893
F13B	-7.66	-7.48	1.02406	0.0343061	0.00756844
F7	-5.06	-5.14	0.984436	-0.022631	0.00499299
F8	-7.59	-7.36	1.03125	0.0443941	0.00979338
FABP12	-6.34	-6.21	1.02093	0.0298896	0.00659423
FABP5	-3.04333	-3.09	0.984898	-0.0219545	0.00484375
FAR2	1.5	1.48	1.01351	0.0193653	0.00427255
FAT3	-7.8	-7.63	1.02228	0.0317911	0.00701367
FATE1	-7.345	-7.15	1.02727	0.0388192	0.00856387
FAU	8.65	8.80667	0.98221	-0.0258959	0.00571326
FBLIM1	-0.97	-1	0.97	-0.0439433	0.00969397
FBXL7	-7.88	-7.69	1.02471	0.035212	0.00776826
FBXO16	-7.8	-7.61	1.02497	0.0355777	0.00784891
FBXO2	-1.495	-1.5	0.996667	-0.00481702	0.0010628
FBXO27	-3.17	-3.26	0.972393	-0.0403891	0.00891011
FBXO39	-5.91	-5.73	1.03141	0.044623	0.00984385
FBXO4	0.38	0.37	1.02703	0.0384741	0.00848776
FBXO40	-6.295	-6.13	1.02692	0.0383193	0.00845361
FCRL1	-7.35	-7.58	0.969657	-0.0444536	0.00980649
FDFT1	3.65	3.72	0.981183	-0.0274062	0.00604641
FDX1L	2.415	2.35	1.02766	0.0393624	0.00868368
FEM1A	-4.78	-4.68	1.02137	0.0305021	0.00672935
FETUB	-6.03	-5.915	1.01944	0.0277798	0.00612884
FGB	-7.72	-7.52667	1.02569	0.0365898	0.00807214
FGD6	-3.61	-3.57	1.0112	0.0160748	0.00354659
FGF12	-7.43	-7.57	0.981506	-0.0269311	0.00594161
FGF20	-7.7	-7.47	1.03079	0.0437502	0.00965137
FGF5	-7.855	-7.66	1.02546	0.0362669	0.00800092
FGG	-7.69	-7.51	1.02397	0.0341707	0.00753857
FHL2	4.41	4.54	0.971366	-0.0419136	0.00924634
FKBP11	4.12	4.08	1.0098	0.0140752	0.00310544
FKBP1A	-2.14	-2.11	1.01422	0.0203678	0.00449371
FKBP6	-7.61	-7.43	1.02423	0.0345342	0.00761876
FLT1	-3.475	-3.455	1.00579	0.00832727	0.00183728
FMO2	-3.82	-3.78	1.01058	0.0151864	0.0033506
FMO3	-7.62	-7.39	1.03112	0.0442166	0.00975424
FN3K	-1.675	-1.68	0.997024	-0.00430014	0.000948762
FNDC5	-4.46	-4.41	1.01134	0.0162651	0.00358857
FOXF1	-3.19	-3.2	0.996875	-0.00451548	0.000996274
FOXI3	-7.52	-7.29	1.03155	0.0448138	0.00988594
FOXK1	-2.9	-2.96	0.97973	-0.0295443	0.00651806
FPR2	-7.81	-7.63	1.02359	0.0336395	0.0074214
FREM2	-7.13	-7.22	0.987535	-0.0180968	0.00399268
FRMD4B	-5.15	-5.27	0.97723	-0.0332305	0.00733119
FRMD7	-7.71	-7.53	1.0239	0.034081	0.00751878
FRMPD4	-7.64	-7.48	1.02139	0.0305344	0.00673647
FSCN1	-2.47	-2.41	1.0249	0.0354779	0.0078269
FSHR	-7.8	-7.58	1.02902	0.0412763	0.00910577
FSIP1	-7.28	-7.18	1.01393	0.0199546	0.00440256
FSTL4	-7.75	-7.57	1.02378	0.033903	0.00747952
FSTL5	-7.5	-7.56	0.992063	-0.0114956	0.00253632
FTO	-3.66	-3.63	1.00826	0.0118741	0.00261982
FUCA1	4.325	4.435	0.975197	-0.036234	0.00799366
FUT1	-5.32	-5.28	1.00758	0.0108883	0.00240233
FUT9	-7.82	-7.62	1.02625	0.0373776	0.00824591
FYN	-2.59	-2.52	1.02778	0.0395284	0.00872027
GABARAP	4.75	4.645	1.0226	0.0322489	0.00711467
GABBR2	-2.99	-2.95	1.01356	0.0194305	0.00428694
GABRA2	-7.83	-7.64	1.02487	0.0354397	0.00781847
GABRP	-7.65	-7.43	1.02961	0.0420975	0.0092869
GABRR1	-7.59	-7.37	1.02985	0.0424353	0.00936138
GALK2	2.44	2.445	0.997955	-0.00295332	0.000651606
GALNT1	5.08	5.12	0.992188	-0.0113153	0.00249654
GANAB	-3.07	-3.165	0.969984	-0.0439668	0.00969915
GAS8	-3.13	-3.14	0.996815	-0.0046019	0.00101534
GBA3	-7.73	-7.51	1.02929	0.0416555	0.00918941
GBP1	-0.825	-0.84	0.982143	-0.0259952	0.00573516
GBX1	-7.6	-7.37	1.03121	0.0443348	0.0097803
GCK	-3.25	-3.345	0.971599	-0.0415665	0.00916978
GCNT4	-7.81	-7.63	1.02359	0.0336395	0.0074214
GDAP1	-7.77	-7.59	1.02372	0.0338147	0.00746005
GDF2	-5.91	-6.04	0.978477	-0.0313904	0.0069253
GDF3	-7.65	-7.45	1.02685	0.0382193	0.00843156
GDF5	-7.81	-7.63	1.02359	0.0336395	0.0074214
GDF9	-6.81	-6.73	1.01189	0.0170483	0.00376137
GDI2	2.61	2.66	0.981203	-0.0273764	0.00603985
GFAP	-3.77	-3.72	1.01344	0.0192619	0.00424974
GFOD1	-5.42	-5.29	1.02457	0.0350251	0.00772703
GFRAL	-7.75	-7.57	1.02378	0.033903	0.00747952
GGT1	3.45	3.55	0.971831	-0.0412227	0.00909395
GGT7	-7.5	-7.42	1.01078	0.0154714	0.00341348
GIPC1	-2.69	-2.74	0.981752	-0.0265697	0.00586189
GIPR	-7.77	-7.55	1.02914	0.041438	0.00914143
GIT2	-2.605	-2.6425	0.985809	-0.0206201	0.00454937
GK5	-1.705	-1.73	0.985549	-0.0210003	0.00463325
GLB1L3	-6.19	-6.08	1.01809	0.0258681	0.00570711
GLI1	-2.33	-2.36	0.987288	-0.0184569	0.00407214
GLIPR1L2	-4.72	-4.82	0.979253	-0.0302463	0.00667292
GLRA1	-7.83	-7.65	1.02353	0.0335526	0.00740222
GLT25D2	-7.82	-7.6	1.02895	0.0411692	0.00908216
GLUL	-2.94	-2.92	1.00685	0.00984779	0.00217276
GLYAT	-4.59	-4.62	0.993506	-0.0093987	0.00207367
GNA12	-3.45	-3.51	0.982906	-0.0248747	0.00548797
GNAT1	-7.38	-7.43	0.993271	-0.00974139	0.00214928
GNG8	-5.43	-5.57	0.974865	-0.0367251	0.008102
GNGT1	-7.8	-7.62	1.02362	0.0336831	0.00743102
GNPDA1	-0.156667	-0.153333	1.02174	0.0310269	0.00684511
GNPTG	1.57	1.58	0.993671	-0.00916	0.00202101
GOLGA3	-3.46	-3.56	0.97191	-0.0411052	0.00906804
GOSR2	-3.16	-3.08	1.02597	0.0369942	0.00816134
GP2	-3.0625	-3.01	1.01744	0.0249464	0.00550378
GPAT2	-4.735	-4.625	1.02378	0.0339111	0.0074813
GPR111	-7.7	-7.54	1.02122	0.0302939	0.00668343
GPR126	-5.38	-5.33	1.00938	0.0134706	0.00297206
GPR137C	-7.57	-7.4	1.02297	0.032768	0.00722917
GPR141	-4.77	-4.71	1.01274	0.0182622	0.00402919
GPR157	-3.04333	-3.01333	1.00996	0.0142921	0.00315329
GPR173	-3.36	-3.35	1.00299	0.00430014	0.000948762
GPR20	-5.02	-5.18	0.969112	-0.0452647	0.00998537
GPR39	-2.21	-2.25	0.982222	-0.0258786	0.00570944
GPR85	-7.48	-7.63	0.980341	-0.0286448	0.00631964
GPR87	-7.8	-7.58	1.02902	0.0412763	0.00910577
GPRC5B	-6.38	-6.3475	1.00512	0.00736793	0.00162562
GPRC6A	-7.77	-7.55	1.02914	0.041438	0.00914143
GPSM1	-6.04667	-5.87	1.0301	0.0427795	0.00943731
GRAMD1A	-2.945	-2.87	1.02613	0.0372169	0.00821046
GRAMD2	-7.55	-7.35	1.02721	0.0387324	0.00854472
GRHL2	-7.57	-7.34	1.03134	0.0445132	0.00981965
GRIA1	-7.45	-7.3	1.02055	0.029344	0.00647388
GRID2	-7.8	-7.62	1.02362	0.0336831	0.00743102
GRIK1	-5.63	-5.8	0.97069	-0.042918	0.00946784
GRIK4	-7.76	-7.52	1.03191	0.045324	0.00999844
GRIN1	-7.86	-7.67	1.02477	0.0353027	0.00778826
GRIN2B	-7.84	-7.62	1.02887	0.0410627	0.00905866
GRK4	-5.035	-5	1.007	0.0100637	0.00222039
GRM7	-7.8	-7.63	1.02228	0.0317911	0.00701367
GRM8	-7.66	-7.48	1.02406	0.0343061	0.00756844
GSTO2	-7.27	-7.325	0.992491	-0.0108734	0.00239904
GTF2E1	-2.93	-2.85	1.02807	0.0399387	0.00881078
GTF2IRD1	-7.53	-7.32	1.02869	0.0408062	0.0090021
GUCY2D	-7.4	-7.24	1.0221	0.0315356	0.00695732
GYPA	-7.46	-7.23	1.03181	0.04518	0.00996668
GYS2	-6.165	-6.125	1.00653	0.00939105	0.00207199
HABP4	-1.96	-1.9	1.03158	0.0448542	0.00989485
HADHA	4.15333	4.13667	1.00403	0.00580095	0.00127989
HADHB	5.24	5.28	0.992424	-0.0109711	0.0024206
HARS2	-1.46	-1.44	1.01389	0.0198996	0.00439041
HAUS5	-5.69	-5.81	0.979346	-0.0301095	0.00664275
HAUS7	-7.31	-7.47	0.978581	-0.0312368	0.00689142
HBG2	-7.67	-7.44	1.03091	0.043924	0.00968969
HCRTR1	-7.87	-7.67	1.02608	0.0371371	0.00819285
HCRTR2	-7.74	-7.51	1.03063	0.0435207	0.00960075
HDX	-7.43	-7.46	0.995979	-0.00581342	0.00128264
HEATR5B	-1.97667	-2.03333	0.972131	-0.0407771	0.00899569
HECW1	-7.51	-7.3	1.02877	0.0409164	0.00902641
HEMGN	-7.21333	-7.05333	1.02268	0.0323609	0.00713936
HEPHL1	-7.27	-7.22	1.00693	0.00995653	0.00219675
HEYL	-7.43	-7.28	1.0206	0.0294238	0.00649148
HFE2	-6.01667	-5.85667	1.02732	0.0388846	0.0085783
HFM1	-7.81	-7.61	1.02628	0.0374261	0.0082566
HGFAC	-6.77	-6.58	1.02888	0.0410683	0.00905989
HHIPL2	-7.74	-7.56	1.02381	0.0339473	0.0074893
HINT2	5.14	5.01	1.02595	0.0369578	0.0081533
HMGCR	1.09333	1.10667	0.987952	-0.0174874	0.00385825
HMGXB3	-3.47	-3.46	1.00289	0.00416362	0.000918643
HOXA13	-7.61	-7.43	1.02423	0.0345342	0.00761876
HOXA9	-7.77	-7.54	1.0305	0.0433501	0.00956313
HOXC4	-7.78	-7.58	1.02639	0.0375723	0.00828885
HOXC5	-7.63	-7.41	1.02969	0.0422095	0.00931159
HOXD9	-7.42	-7.27	1.02063	0.0294638	0.00650032
HPCA	-7.57	-7.34	1.03134	0.0445132	0.00981965
HRASLS5	-7.4	-7.18	1.03064	0.0435414	0.00960533
HRH4	-7.29	-7.18	1.01532	0.021935	0.00483945
HS1BP3	-3.9	-4.01	0.972569	-0.0401281	0.00885255
HS3ST2	-7.43	-7.29	1.0192	0.0274434	0.00605463
HS6ST2	-7.65	-7.43	1.02961	0.0420975	0.0092869
HSD17B6	-3.2	-3.3	0.969697	-0.0443941	0.00979338
HSDL1	-5.5	-5.52	0.996377	-0.00523665	0.00115539
HSF4	-4.74	-4.65	1.01935	0.0276563	0.0061016
HTR3A	-7.47	-7.355	1.01564	0.0223829	0.00493827
HTR3C	-4.03	-4	1.0075	0.0107798	0.00237839
HTRA4	-6.17	-6.11	1.00982	0.0140981	0.0031105
HTT	-2.925	-2.9	1.00862	0.0123837	0.00273226
HYAL4	-7.86	-7.65	1.02745	0.0390696	0.00861908
IARS	-1.99333	-2.02333	0.985173	-0.021551	0.00475475
ICAM4	-7.79	-7.58	1.0277	0.0394255	0.00869758
IFNB1	-7.27	-7.16	1.01536	0.0219958	0.00485286
IGF2BP2	-2.37	-2.3	1.03043	0.0432532	0.00954177
IGHMBP2	-2.29	-2.23	1.02691	0.0383039	0.00845021
IGSF11	-6.68	-6.855	0.974471	-0.0373086	0.00823068
IL17RD	-7.87	-7.68	1.02474	0.0352573	0.00777825
IL18R1	-5.97	-6.11	0.977087	-0.0334414	0.00737771
IL1B	-7.26	-7.40667	0.980198	-0.0288549	0.00636599
IL1F5	-7.47	-7.32	1.02049	0.0292646	0.00645637
IL1F8	-7.78	-7.6	1.02368	0.0337707	0.00745035
IL1R1	-7.87	-7.68	1.02474	0.0352573	0.00777825
IL21R	-5.77	-5.86	0.984642	-0.0223293	0.00492645
IL22	-5.2	-5.11	1.01761	0.0251883	0.00555716
IL24	-5.77	-5.65	1.02124	0.0303205	0.00668928
IL7R	-2.635	-2.585	1.01934	0.0276387	0.0060977
ILDR2	-7.83	-7.61	1.02891	0.0411159	0.00907039
INA	-7.66	-7.49	1.0227	0.0323787	0.00714329
INHA	-4.15	-4.05	1.02469	0.0351894	0.00776327
INMT	-7.7	-7.52	1.02394	0.0341258	0.00752866
INSL6	-7.77	-7.58	1.02507	0.0357167	0.00787958
INTU	-7.79	-7.57	1.02906	0.04133	0.00911763
IPO7	1.505	1.54	0.977273	-0.0331669	0.00731715
IQCA1	-7.775	-7.555	1.02912	0.0414109	0.00913547
IQCF3	-7.48	-7.25	1.03172	0.0450573	0.00993962
IQCK	-5.64	-5.52	1.02174	0.0310269	0.00684511
IQSEC2	-7.79	-7.61	1.02365	0.0337269	0.00744067
IQSEC3	-7.73	-7.55	1.02384	0.0339918	0.0074991
IRF3	3.1	3.15	0.984127	-0.0230836	0.00509285
IRG1	-7.83	-7.61	1.02891	0.0411159	0.00907039
IRX2	-7.76	-7.52	1.03191	0.045324	0.00999844
ITGA2	-1.18	-1.19	0.991597	-0.0121747	0.00268614
ITGAD	-7.77	-7.55	1.02914	0.041438	0.00914143
JAG1	-4.37	-4.49	0.973274	-0.0390822	0.00862186
JAKMIP2	-7.61	-7.565	1.00595	0.00855637	0.00188783
JAM3	-3.75	-3.81	0.984252	-0.0229004	0.00505243
JMJD5	-3.1	-3.03	1.0231	0.0329504	0.0072694
JPH3	-7.79	-7.61	1.02365	0.0337269	0.00744067
KATNAL2	-7.76	-7.58	1.02375	0.0338588	0.00746977
KATNB1	-2.25	-2.265	0.993377	-0.00958605	0.00211501
KBTBD10	-7.49	-7.39	1.01353	0.0193914	0.00427829
KBTBD4	-4.3875	-4.4875	0.977716	-0.0325128	0.00717288
KBTBD5	-7.69	-7.51	1.02397	0.0341707	0.00753857
KCNC2	-5.85	-5.78	1.01211	0.0173671	0.00383172
KCND1	-7.79	-7.61	1.02365	0.0337269	0.00744067
KCNH1	-7.74	-7.55	1.02517	0.0358569	0.0079105
KCNH7	-4.78	-4.65	1.02796	0.0397799	0.00877575
KCNJ1	-7.86	-7.68	1.02344	0.033423	0.00737364
KCNJ10	-7.63	-7.46	1.02279	0.0325074	0.00717169
KCNJ13	-7.85	-7.67	1.02347	0.0334661	0.00738315
KCNJ5	-7.73	-7.5	1.03067	0.0435778	0.00961336
KCNJ6	-6.53	-6.72	0.971726	-0.0413782	0.00912826
KCNJ8	-2.31	-2.36	0.978814	-0.030894	0.0068158
KCNK16	-4.99	-4.92	1.01423	0.0203815	0.00449673
KCNMA1	-7.42	-7.34	1.0109	0.0156391	0.00345048
KCNMB2	-7.79	-7.59	1.02635	0.0375234	0.00827807
KCNN4	-2.21	-2.26	0.977876	-0.0322764	0.00712073
KCNS2	-7.69	-7.51	1.02397	0.0341707	0.00753857
KCNV1	-7.81	-7.63	1.02359	0.0336395	0.0074214
KCTD13	-4.91	-4.88	1.00615	0.00884188	0.00195082
KCTD16	-7.69	-7.48	1.02807	0.0399453	0.00881224
KCTD21	-7.51	-7.31	1.02736	0.0389415	0.00859084
KCTD9	-2.57	-2.56	1.00391	0.00562455	0.00124097
KDELR2	2.48	2.43667	1.01778	0.0254312	0.00561074
KDM5C	-2.835	-2.825	1.00354	0.00509787	0.00112477
KERA	-7.88	-7.69	1.02471	0.035212	0.00776826
KIF1A	-6.875	-6.705	1.02535	0.0361224	0.00796905
KIF27	-5.23	-5.36	0.975746	-0.0354221	0.00781458
KIF6	-7.47	-7.31	1.02189	0.0312368	0.00689142
KIF9	-2.8	-2.81	0.996441	-0.0051433	0.00113479
KIRREL2	-3.47	-3.44	1.00872	0.0125271	0.00276389
KLB	-6.57	-6.44333	1.01966	0.0280861	0.00619641
KLF12	-3.98	-3.93	1.01272	0.0182391	0.00402409
KLHL17	-2.3	-2.34	0.982906	-0.0248747	0.00548797
KLHL28	2.28	2.3	0.991304	-0.0126	0.00277998
KLHL38	-7.495	-7.39	1.01421	0.0203541	0.00449069
KLHL4	-7.78	-7.59	1.02503	0.0356703	0.00786933
KLHL6	-7.78	-7.59	1.02503	0.0356703	0.00786933
KLK11	-2.61	-2.64	0.988636	-0.0164881	0.00363779
KLK12	-7.85	-7.66	1.0248	0.0353483	0.0077983
KLK13	-7.73	-7.54	1.0252	0.0359039	0.00792086
KLK6	-7.68	-7.49	1.02537	0.0361406	0.00797307
KLK7	-7.55	-7.38	1.02304	0.0328558	0.00724854
KREMEN1	-6.63	-6.62	1.00151	0.00217765	0.000480468
KRT23	-7.84	-7.65	1.02484	0.0353939	0.00780837
KRT26	-7.81	-7.63	1.02359	0.0336395	0.0074214
KRT40	-7.58	-7.41	1.02294	0.0327243	0.00721953
KRT72	-7.8	-7.62	1.02362	0.0336831	0.00743102
KRT73	-7.58	-7.41	1.02294	0.0327243	0.00721953
KRT9	-7.64	-7.47	1.02276	0.0324644	0.0071622
LALBA	-6.225	-6.115	1.01799	0.0257213	0.00567474
LAMB4	-7.86	-7.66	1.02611	0.0371849	0.00820341
LAMP1	5.12	5.205	0.98367	-0.0237544	0.00524082
LARP1	-1.58333	-1.54333	1.02592	0.0369153	0.00814395
LASS3	-7.72333	-7.50667	1.02886	0.0410512	0.00905614
LBR	-2.82	-2.77	1.01805	0.0258092	0.00569412
LCA5	-3.56	-3.63	0.980716	-0.0280923	0.00619777
LCN15	-5.73	-5.67	1.01058	0.0151864	0.0033506
LDHC	-7.8	-7.61	1.02497	0.0355777	0.00784891
LDLRAP1	-5.7	-5.88	0.969388	-0.0448542	0.00989485
LECT2	-6.82	-6.735	1.01262	0.0180938	0.00399203
LEMD3	-3.39	-3.48	0.974138	-0.037802	0.00833952
LEPR	-7.645	-7.47	1.02343	0.0334083	0.00737039
LEPROTL1	3.64	3.75	0.970667	-0.0429521	0.00947537
LETMD1	-2.69667	-2.68333	1.00497	0.00715092	0.00157774
LGALS9	4.915	5.035	0.976167	-0.0348004	0.00767745
LGI2	-7.4	-7.63	0.969856	-0.0441578	0.00974126
LGSN	-7.515	-7.35	1.02245	0.0320289	0.00706613
LHX1	-7.72	-7.54	1.02387	0.0340363	0.00750893
LHX3	-7.44	-7.21	1.0319	0.0453034	0.00999389
LHX5	-7.79	-7.55	1.03179	0.0451467	0.00995934
LHX6	-7.72	-7.52	1.0266	0.0378682	0.00835411
LIM2	-7.79	-7.61	1.02365	0.0337269	0.00744067
LINGO1	-6.41	-6.39	1.00313	0.00450843	0.000994718
LMAN2L	-4.11	-4.06	1.01232	0.0176587	0.00389603
LMBR1	-4.22	-4.27	0.98829	-0.0169931	0.00374919
LMF1	-1.61	-1.57	1.02548	0.0362961	0.00800737
LMOD3	-7.445	-7.515	0.990685	-0.0135013	0.00297881
LOC100499480	8.406	8.536	0.98477	-0.0221407	0.00488484
LOC403889	-7.77	-7.55	1.02914	0.041438	0.00914143
LOC442975	-7.72	-7.54	1.02387	0.0340363	0.00750893
LOC474524	3.4	3.42	0.994152	-0.00846158	0.00186691
LOC474543	-7.65	-7.62	1.00394	0.00566875	0.00125072
LOC474575	-1.565	-1.585	0.987382	-0.0183202	0.00404198
LOC474747	-3.91	-3.84	1.01823	0.0260623	0.00574996
LOC474748	-6.83	-6.76667	1.00936	0.0134403	0.00296536
LOC474790	-7.755	-7.555	1.02647	0.037695	0.00831592
LOC474982	0.91	0.905	1.00552	0.00794875	0.00175377
LOC474983	-4.85	-4.79	1.01253	0.0179591	0.00396231
LOC475019	-7.74	-7.55	1.02517	0.0358569	0.0079105
LOC475165	-7.76	-7.53	1.03054	0.0434068	0.00957564
LOC475216	-7.84	-7.66	1.0235	0.0335093	0.00739267
LOC475419	-6.825	-6.93	0.984848	-0.0220263	0.0048596
LOC475522	-7.73	-7.54	1.0252	0.0359039	0.00792086
LOC475691	-7.555	-7.38	1.02371	0.0338109	0.00745921
LOC475708	-5.42	-5.32	1.0188	0.0268666	0.00592739
LOC475911	-2.63	-2.695	0.975881	-0.0352225	0.00777056
LOC476040	6.74	6.58	1.02432	0.034661	0.00764672
LOC476114	-7.84	-7.66	1.0235	0.0335093	0.00739267
LOC476201	-1.75	-1.7	1.02941	0.0418202	0.00922573
LOC476248	-7.8	-7.59	1.02767	0.0393742	0.00868628
LOC476315	5.585	5.695	0.980685	-0.0281386	0.00620797
LOC476397	-7.21	-7.42	0.971698	-0.0414199	0.00913746
LOC476453	-2.21	-2.18	1.01376	0.0197182	0.00435041
LOC476489	-7.77	-7.58	1.02507	0.0357167	0.00787958
LOC476669	4.7	4.6	1.02174	0.0310269	0.00684511
LOC476676	3.215	3.29	0.977204	-0.0332688	0.00733964
LOC476944	-3.36	-3.39667	0.989205	-0.0156584	0.00345474
LOC477287	-5.53	-5.69	0.97188	-0.0411492	0.00907774
LOC477365	-7.85	-7.67	1.02347	0.0334661	0.00738315
LOC477366	-7.43	-7.29	1.0192	0.0274434	0.00605463
LOC477368	-7.64	-7.47	1.02276	0.0324644	0.0071622
LOC477425	-7.38	-7.32	1.0082	0.0117772	0.00259843
LOC477486	-5.33	-5.26	1.01331	0.0190727	0.004208
LOC477508	7.61	7.47	1.01874	0.0267882	0.00591009
LOC477569	3.32	3.34	0.994012	-0.00866486	0.00191177
LOC477694	-7.35	-7.13	1.03086	0.0438422	0.00967166
LOC477831	-7.56	-7.34	1.02997	0.0426062	0.00939907
LOC477837	-1.54	-1.495	1.0301	0.0427849	0.00943848
LOC477942	3.26	3.17	1.02839	0.0403891	0.00891011
LOC478114	2.11	2.05	1.02927	0.0416191	0.00918138
LOC478169	-4.76	-4.83	0.985507	-0.0210616	0.00464678
LOC478206	-7.61	-7.44	1.02285	0.0325938	0.00719075
LOC478449	-4.215	-4.22	0.998815	-0.00171037	0.000377368
LOC478524	-7.8	-7.62	1.02362	0.0336831	0.00743102
LOC478566	-7.8	-7.62	1.02362	0.0336831	0.00743102
LOC478639	6.805	6.725	1.0119	0.0170609	0.00376415
LOC478692	-7.85	-7.67	1.02347	0.0334661	0.00738315
LOC478705	-4.965	-4.995	0.993994	-0.00869096	0.00191752
LOC478790	-5	-4.93	1.0142	0.0203404	0.00448768
LOC478990	-2.12	-2.08	1.01923	0.0274807	0.00606286
LOC478994	-5.56	-5.5	1.01091	0.0156533	0.0034536
LOC479007	-7.82	-7.62	1.02625	0.0373776	0.00824591
LOC479235	-2.45	-2.46	0.995935	-0.00587657	0.00129658
LOC479395	-6.3	-6.42	0.981308	-0.0272215	0.00600567
LOC479439	2.22	2.27	0.977974	-0.0321326	0.00708901
LOC479467	-4.08	-4.05	1.00741	0.0106472	0.00234914
LOC479559	-7.76	-7.54	1.02918	0.0414921	0.00915338
LOC479717	4.405	4.2975	1.02501	0.0356444	0.00786362
LOC479816	-7.79	-7.56	1.03042	0.0432371	0.00953821
LOC479820	-2.54	-2.505	1.01397	0.0200179	0.00441652
LOC479934	-6.875	-6.695	1.02689	0.0382757	0.00844398
LOC479983	-4.88667	-4.77	1.02446	0.0348614	0.00769092
LOC480000	-5.25	-5.2	1.00962	0.0138058	0.003046
LOC480033	-7.74	-7.53	1.02789	0.0396837	0.00875453
LOC480051	-7.08333	-7.10333	0.997184	-0.00406775	0.00089749
LOC480097	-7.78	-7.6	1.02368	0.0337707	0.00745035
LOC480151	-5.89	-5.88	1.0017	0.00245148	0.000540883
LOC480351	-7.605	-7.37	1.03189	0.0452836	0.00998954
LOC480391	-3.355	-3.3325	1.00675	0.00970789	0.00214189
LOC480468	-4.36	-4.41	0.988662	-0.0164505	0.00362949
LOC480476	-7.78	-7.58	1.02639	0.0375723	0.00828885
LOC480499	-7.625	-7.435	1.02555	0.0364046	0.0080313
LOC480532	2.79333	2.82	0.990544	-0.0137074	0.0030243
LOC480535	-2.32	-2.34	0.991453	-0.0123837	0.00273226
LOC480643	-7.79	-7.56	1.03042	0.0432371	0.00953821
LOC480722	-4.51	-4.58	0.984716	-0.0222202	0.00490237
LOC481043	1.35	1.34	1.00746	0.0107264	0.00236661
LOC481133	-7.65	-7.47	1.0241	0.0343515	0.00757845
LOC481139	-7.79	-7.56	1.03042	0.0432371	0.00953821
LOC481173	-7.82	-7.64	1.02356	0.033596	0.0074118
LOC481199	-6.39	-6.48	0.986111	-0.0201779	0.00445181
LOC481273	-7.57	-7.4	1.02297	0.032768	0.00722917
LOC481348	-2.59	-2.66	0.973684	-0.0384741	0.00848776
LOC481438	-7.84	-7.66	1.0235	0.0335093	0.00739267
LOC481569	-5.53	-5.43	1.01842	0.0263273	0.00580841
LOC481633	-7.46	-7.23	1.03181	0.04518	0.00996668
LOC481649	-7.8	-7.63	1.02228	0.0317911	0.00701367
LOC481829	-7.77	-7.59	1.02372	0.0338147	0.00746005
LOC481849	-7.79	-7.56	1.03042	0.0432371	0.00953821
LOC481879	-7.85	-7.65	1.02614	0.0372329	0.00821399
LOC482125	-7.85	-7.65	1.02614	0.0372329	0.00821399
LOC482210	-7.81	-7.64	1.02225	0.0317499	0.0070046
LOC482225	-7.81	-7.62	1.02493	0.0355316	0.00783873
LOC482239	-7.59	-7.37	1.02985	0.0424353	0.00936138
LOC482303	-7.88	-7.68	1.02604	0.0370893	0.00818232
LOC482312	-7.65	-7.45	1.02685	0.0382193	0.00843156
LOC482354	3.945	3.835	1.02868	0.0407987	0.00900045
LOC482418	-7.73	-7.54	1.0252	0.0359039	0.00792086
LOC482439	-7.24	-7.13	1.01543	0.0220876	0.00487313
LOC482441	-4.91	-5	0.982	-0.0262051	0.00578145
LOC482570	-3.54	-3.52	1.00568	0.00817393	0.00180345
LOC482725	-7.73	-7.54	1.0252	0.0359039	0.00792086
LOC482755	-7.44	-7.29	1.02058	0.0293838	0.00648267
LOC482765	-5.28	-5.3	0.996226	-0.00545443	0.00120344
LOC482849	-7.61	-7.44	1.02285	0.0325938	0.00719075
LOC482882	-3.46	-3.44	1.00581	0.00836347	0.00184527
LOC482907	-7.76	-7.59	1.0224	0.0319568	0.00705022
LOC482969	-3.12	-3.04	1.02632	0.0374747	0.00826732
LOC483003	-4.22	-4.34	0.97235	-0.040452	0.00892399
LOC483142	-3.91	-3.92	0.997449	-0.00368505	0.000813052
LOC483166	-2.4	-2.37	1.01266	0.0181473	0.00400385
LOC483173	2.67	2.69	0.992565	-0.0107664	0.00237544
LOC483450	-7.82	-7.64	1.02356	0.033596	0.0074118
LOC483455	-7.79	-7.62	1.02231	0.0318323	0.00702278
LOC483474	-7.84	-7.66	1.0235	0.0335093	0.00739267
LOC483479	-7.81	-7.63	1.02359	0.0336395	0.0074214
LOC483485	-5.86	-5.72	1.02448	0.0348855	0.00769624
LOC483500	-7.63	-7.46	1.02279	0.0325074	0.00717169
LOC483521	-7.77	-7.59	1.02372	0.0338147	0.00746005
LOC483524	-7.87	-7.68	1.02474	0.0352573	0.00777825
LOC483541	-7.37	-7.15	1.03077	0.0437214	0.00964502
LOC483559	-7.78	-7.55	1.03046	0.0432935	0.00955066
LOC483802	-7.8	-7.57	1.03038	0.0431808	0.0095258
LOC483905	-7.79	-7.62	1.02231	0.0318323	0.00702278
LOC483936	-7.5	-7.55	0.993377	-0.00958605	0.00211501
LOC483997	-7.76	-7.58	1.02375	0.0338588	0.00746977
LOC484017	-7.81	-7.63	1.02359	0.0336395	0.0074214
LOC484026	-7.74	-7.56	1.02381	0.0339473	0.0074893
LOC484101	-7.53	-7.33	1.02729	0.0388367	0.00856772
LOC484162	-5.1	-5.21	0.978887	-0.0307861	0.006792
LOC484191	-7.74	-7.56	1.02381	0.0339473	0.0074893
LOC484249	-5.05	-5.11	0.988258	-0.0170399	0.00375952
LOC484289	-3.92	-3.89	1.00771	0.0110835	0.00244539
LOC484475	2.98	3.04	0.980263	-0.028759	0.00634484
LOC484611	-0.21	-0.215	0.976744	-0.0339473	0.0074893
LOC484859	-7.31	-7.13	1.02525	0.0359693	0.00793529
LOC484973	-4.75	-4.76	0.997899	-0.00303406	0.000669421
LOC485076	4.82	4.79	1.00626	0.00900749	0.00198736
LOC485140	-6.81	-6.75	1.00889	0.0127673	0.00281688
LOC485235	-7.78	-7.58	1.02639	0.0375723	0.00828885
LOC485270	-7.87	-7.69	1.02341	0.03338	0.00736417
LOC485288	-7.75	-7.57	1.02378	0.033903	0.00747952
LOC485290	-7.6	-7.44	1.02151	0.0306968	0.0067723
LOC485294	-7.55	-7.32	1.03142	0.044633	0.00984606
LOC485295	-7.77	-7.57	1.02642	0.0376213	0.00829966
LOC485321	-7.84	-7.62	1.02887	0.0410627	0.00905866
LOC485345	-7.76	-7.57	1.0251	0.0357634	0.00788986
LOC485372	-7.72	-7.54	1.02387	0.0340363	0.00750893
LOC485415	-7.86	-7.68	1.02344	0.033423	0.00737364
LOC485435	-7.69	-7.51	1.02397	0.0341707	0.00753857
LOC485485	-6.39667	-6.22333	1.02785	0.0396328	0.0087433
LOC485538	-7.66	-7.46	1.02681	0.0381688	0.00842041
LOC485562	-7.72	-7.515	1.02728	0.0388277	0.00856575
LOC485723	-2.03	-2.08	0.975962	-0.0351038	0.00774438
LOC485750	-7.51	-7.35	1.02177	0.0310687	0.00685432
LOC485868	-5.68	-5.74	0.989547	-0.0151598	0.00334473
LOC486428	-4.84	-4.8	1.00833	0.0119726	0.00264156
LOC486584	-7.87	-7.67	1.02608	0.0371371	0.00819285
LOC486688	-7.39	-7.37	1.00271	0.00390975	0.000862628
LOC486982	-7.81	-7.63	1.02359	0.0336395	0.0074214
LOC487248	-7.56	-7.33	1.03138	0.044573	0.00983283
LOC487375	-7.84	-7.65	1.02484	0.0353939	0.00780837
LOC487996	-4.37	-4.28	1.02103	0.0300225	0.00662355
LOC488139	-7.8	-7.62	1.02362	0.0336831	0.00743102
LOC488146	-7.77	-7.58	1.02507	0.0357167	0.00787958
LOC488147	-7.82	-7.61	1.0276	0.0392722	0.00866377
LOC488253	-7.42	-7.27	1.02063	0.0294638	0.00650032
LOC488303	-7.71	-7.53	1.0239	0.034081	0.00751878
LOC488474	-7.79	-7.56	1.03042	0.0432371	0.00953821
LOC488624	-5.03	-4.96	1.01411	0.0202183	0.00446073
LOC488873	-4.42	-4.48	0.986607	-0.0194524	0.00429175
LOC488882	-7.79	-7.58	1.0277	0.0394255	0.00869758
LOC488965	-2.09	-2.07	1.00966	0.0138722	0.00306065
LOC488972	-1.44	-1.45	0.993103	-0.00998409	0.00220283
LOC489137	-7.73	-7.5	1.03067	0.0435778	0.00961336
LOC489167	1.835	1.89	0.970899	-0.0426062	0.00939907
LOC489189	-7.61	-7.6	1.00132	0.00189704	0.000418553
LOC489314	-7.53	-7.33	1.02729	0.0388367	0.00856772
LOC489315	-3.91	-3.84	1.01823	0.0260623	0.00574996
LOC489325	-7.79	-7.57	1.02906	0.04133	0.00911763
LOC489338	-7.87	-7.68	1.02474	0.0352573	0.00777825
LOC489341	-7.71	-7.53	1.0239	0.034081	0.00751878
LOC489360	-7.87	-7.67	1.02608	0.0371371	0.00819285
LOC489394	-7.8	-7.61	1.02497	0.0355777	0.00784891
LOC489401	-7.82	-7.65	1.02222	0.0317089	0.00699554
LOC489434	-7.75	-7.52	1.03059	0.0434636	0.00958818
LOC489510	-7.15	-7.31333	0.977666	-0.0325859	0.00718899
LOC489566	-7.84	-7.63	1.02752	0.0391706	0.00864137
LOC489647	-7.375	-7.2	1.02431	0.0346461	0.00764344
LOC489915	-7.73	-7.63	1.01311	0.0187854	0.0041446
LOC489979	-7.8	-7.61	1.02497	0.0355777	0.00784891
LOC490096	-3.19	-3.14	1.01592	0.0227919	0.00502849
LOC490205	-7.26	-7.15	1.01538	0.0220263	0.0048596
LOC490408	1.82	1.85	0.983784	-0.0235868	0.00520386
LOC490428	-0.68	-0.66	1.0303	0.0430687	0.00950108
LOC490577	-7.79	-7.63	1.02097	0.0299403	0.00660542
LOC490597	-7.8	-7.58	1.02902	0.0412763	0.00910577
LOC490598	-4.44	-4.57	0.971554	-0.0416345	0.00918478
LOC490601	-7.73	-7.5	1.03067	0.0435778	0.00961336
LOC490635	-7.8	-7.63	1.02228	0.0317911	0.00701367
LOC490726	-7.24	-7.46	0.970509	-0.0431859	0.00952693
LOC490887	-7.8	-7.61	1.02497	0.0355777	0.00784891
LOC490896	-5.47	-5.31	1.03013	0.042829	0.00944821
LOC491090	4.78	4.77	1.0021	0.00302135	0.000666617
LOC491149	-7.32	-7.19	1.01808	0.0258519	0.00570354
LOC491229	-7.59	-7.53	1.00797	0.01145	0.00252626
LOC491253	-7.27	-7.16	1.01536	0.0219958	0.00485286
LOC491357	-2.55667	-2.49333	1.0254	0.0361883	0.00798359
LOC491435	-7.44	-7.29	1.02058	0.0293838	0.00648267
LOC491481	-7.79	-7.61	1.02365	0.0337269	0.00744067
LOC491559	-4.35	-4.34	1.0023	0.00332036	0.000732589
LOC491601	-6.45	-6.6	0.977273	-0.0331669	0.00731715
LOC491627	-7.85	-7.66	1.0248	0.0353483	0.0077983
LOC491629	-7.59	-7.37	1.02985	0.0424353	0.00936138
LOC491639	-5.32	-5.19	1.02505	0.0356917	0.00787406
LOC491820	-7.86	-7.66	1.02611	0.0371849	0.00820341
LOC492040	-7.66	-7.48	1.02406	0.0343061	0.00756844
LOC492054	-7.82	-7.6	1.02895	0.0411692	0.00908216
LOC492152	-7.5	-7.43	1.00942	0.0135284	0.0029848
LOC492209	-7.73	-7.5	1.03067	0.0435778	0.00961336
LOC492262	-7.7	-7.52	1.02394	0.0341258	0.00752866
LOC606772	-7.87	-7.68	1.02474	0.0352573	0.00777825
LOC606793	-7.8	-7.605	1.02564	0.0365259	0.00805805
LOC606856	-7.78	-7.6	1.02368	0.0337707	0.00745035
LOC606910	-7.82	-7.63	1.0249	0.0354855	0.00782859
LOC606998	-4.42	-4.31	1.02552	0.0363585	0.00802113
LOC607016	-2.455	-2.41	1.01867	0.0266899	0.0058884
LOC607049	-3.37	-3.42	0.98538	-0.0212477	0.00468784
LOC607086	-2.52	-2.5	1.008	0.0114956	0.00253632
LOC607129	-7.695	-7.505	1.02532	0.0360693	0.00795733
LOC607239	-7.76	-7.58	1.02375	0.0338588	0.00746977
LOC607338	-4.95	-4.8	1.03125	0.0443941	0.00979338
LOC607351	-1.15667	-1.13	1.0236	0.0336504	0.0074238
LOC607365	6.05	6.105	0.990991	-0.0130562	0.00288061
LOC607485	-7.35	-7.48	0.98262	-0.025294	0.00558048
LOC607508	-5.13	-5.22	0.982759	-0.025091	0.00553568
LOC607515	-7.43	-7.28	1.0206	0.0294238	0.00649148
LOC607539	-7.67	-7.47	1.02677	0.0381183	0.00840928
LOC607697	2.58	2.56333	1.0065	0.00934997	0.00206292
LOC607723	-7.87	-7.68	1.02474	0.0352573	0.00777825
LOC607729	-6.60333	-6.75	0.978272	-0.031693	0.00699205
LOC607801	-7.33	-7.2	1.01806	0.0258163	0.00569569
LOC607806	-5.16	-5.02	1.02789	0.0396837	0.00875453
LOC607807	-7.82	-7.6	1.02895	0.0411692	0.00908216
LOC607848	-7.83	-7.65	1.02353	0.0335526	0.00740222
LOC607933	-4.51	-4.54	0.993392	-0.00956486	0.00211033
LOC607953	-7.76	-7.52	1.03191	0.045324	0.00999844
LOC607966	-7.7	-7.48	1.02941	0.0418202	0.00922573
LOC608007	-7.87	-7.69	1.02341	0.03338	0.00736417
LOC608088	-7.78	-7.61	1.02234	0.0318737	0.0070319
LOC608090	-7.76	-7.58	1.02375	0.0338588	0.00746977
LOC608302	-7.88	-7.7	1.02338	0.0333372	0.00735472
LOC608359	-7.48	-7.33	1.02046	0.0292251	0.00644765
LOC608457	-7.76	-7.53	1.03054	0.0434068	0.00957564
LOC608480	-7.87	-7.68	1.02474	0.0352573	0.00777825
LOC608493	-4.54	-4.51	1.00665	0.00956486	0.00211033
LOC608500	-7.79	-7.6	1.025	0.0356239	0.0078591
LOC608537	-5.05	-4.98	1.01406	0.0201376	0.00444294
LOC608561	-7.77	-7.59	1.02372	0.0338147	0.00746005
LOC608630	-7.605	-7.4	1.0277	0.039423	0.00869703
LOC608645	-7.66	-7.47	1.02544	0.0362361	0.00799414
LOC608660	-7.77	-7.55	1.02914	0.041438	0.00914143
LOC608685	-7.76	-7.57	1.0251	0.0357634	0.00788986
LOC608808	-7.73	-7.52	1.02793	0.0397358	0.00876601
LOC608857	-2.61	-2.56	1.01953	0.027906	0.00615667
LOC608891	-3.64	-3.65	0.99726	-0.00395801	0.000873278
LOC608892	-4.97	-5	0.994	-0.00868224	0.0019156
LOC608922	-2.1	-2.07	1.01449	0.0207586	0.00457992
LOC608939	-0.97	-0.99	0.979798	-0.0294438	0.00649589
LOC608960	4.53	4.46	1.0157	0.0224673	0.00495689
LOC608983	-6.32	-6.47	0.976816	-0.0338412	0.00746588
LOC609044	-5.38	-5.3	1.01509	0.0216138	0.0047686
LOC609066	-7.46	-7.67	0.972621	-0.0400509	0.00883553
LOC609124	-3.18667	-3.23	0.986584	-0.019486	0.00429919
LOC609138	-7.71	-7.53	1.0239	0.034081	0.00751878
LOC609140	-7.73	-7.56	1.02249	0.0320822	0.00707789
LOC609275	-7.54	-7.33	1.02865	0.0407513	0.00899
LOC609277	-7.04	-7.08333	0.993882	-0.00885301	0.00195328
LOC609321	-7.805	-7.58	1.02968	0.0422008	0.00930967
LOC609323	-7.72	-7.53	1.02523	0.035951	0.00793125
LOC609420	4.21	4.29	0.981352	-0.0271574	0.00599154
LOC609482	-7.44	-7.29	1.02058	0.0293838	0.00648267
LOC609553	-7.75	-7.57	1.02378	0.033903	0.00747952
LOC609559	-2.36	-2.37	0.995781	-0.0061002	0.00134592
LOC609564	-6.37	-6.36	1.00157	0.00226661	0.000500094
LOC609570	-1.34	-1.33	1.00752	0.0108068	0.00238433
LOC609666	-2.34	-2.4	0.975	-0.0365259	0.00805805
LOC609736	-7.53	-7.36	1.0231	0.0329441	0.00726801
LOC609744	8.18	8.03	1.01868	0.0267009	0.00589082
LOC609748	-7.62	-7.45	1.02282	0.0325506	0.00718121
LOC609788	-7.8	-7.63	1.02228	0.0317911	0.00701367
LOC609821	-7.61	-7.43	1.02423	0.0345342	0.00761876
LOC609827	-1.8	-1.76	1.02273	0.0324215	0.00715273
LOC609927	-7.84	-7.66	1.0235	0.0335093	0.00739267
LOC609966	-7.85	-7.65	1.02614	0.0372329	0.00821399
LOC609981	-7.7	-7.52	1.02394	0.0341258	0.00752866
LOC610010	-4.39	-4.26	1.03052	0.0433675	0.00956698
LOC610018	-7.86	-7.66	1.02611	0.0371849	0.00820341
LOC610022	-7.83	-7.63	1.02621	0.0373293	0.00823524
LOC610051	-6.815	-7.015	0.97149	-0.0417294	0.00920572
LOC610091	-7.87	-7.68	1.02474	0.0352573	0.00777825
LOC610163	-7.57	-7.4	1.02297	0.032768	0.00722917
LOC610217	-7.86	-7.66	1.02611	0.0371849	0.00820341
LOC610221	2.04	1.98333	1.02857	0.040642	0.00896588
LOC610266	-7.76	-7.53	1.03054	0.0434068	0.00957564
LOC610298	-7.71	-7.48	1.03075	0.0436926	0.00963867
LOC610368	-7.29	-7.17	1.01674	0.0239457	0.00528303
LOC610433	4.09	4.07	1.00491	0.00707205	0.00156034
LOC610513	-7.78	-7.58	1.02639	0.0375723	0.00828885
LOC610514	-3.76	-3.88	0.969072	-0.045324	0.00999844
LOC610532	-7.66	-7.48	1.02406	0.0343061	0.00756844
LOC610537	6.55	6.72	0.974702	-0.0369663	0.0081552
LOC610547	-7.29	-7.17	1.01674	0.0239457	0.00528303
LOC610561	-7.81	-7.59	1.02899	0.0412227	0.00909395
LOC610595	-3.51	-3.49	1.00573	0.00824399	0.00181891
LOC610613	-3.85	-3.97	0.969773	-0.0442806	0.00976833
LOC610677	-4.2	-4.23	0.992908	-0.0102683	0.00226554
LOC610732	-7.8	-7.61	1.02497	0.0355777	0.00784891
LOC610737	-7.79	-7.57	1.02906	0.04133	0.00911763
LOC610780	-7.75	-7.56	1.02513	0.0358101	0.00790017
LOC610901	-7.61	-7.43	1.02423	0.0345342	0.00761876
LOC610931	-7.57	-7.36	1.02853	0.0405875	0.00895387
LOC610944	-7.82	-7.61	1.0276	0.0392722	0.00866377
LOC610972	-7.82	-7.63	1.0249	0.0354855	0.00782859
LOC610976	-7.73	-7.54	1.0252	0.0359039	0.00792086
LOC611002	-4.6	-4.625	0.994595	-0.0078195	0.00172525
LOC611068	-7.78	-7.58	1.02639	0.0375723	0.00828885
LOC611126	-7.81	-7.62	1.02493	0.0355316	0.00783873
LOC611129	-7.75	-7.54	1.02785	0.0396318	0.00874308
LOC611141	-3.98	-4.02	0.99005	-0.0144271	0.00318307
LOC611180	-7.83	-7.65	1.02353	0.0335526	0.00740222
LOC611181	-7.52	-7.36	1.02174	0.0310269	0.00684511
LOC611185	1.13	1.16	0.974138	-0.037802	0.00833952
LOC611320	-7.78	-7.6	1.02368	0.0337707	0.00745035
LOC611361	-7.72	-7.54	1.02387	0.0340363	0.00750893
LOC611421	-2.31	-2.24	1.03125	0.0443941	0.00979338
LOC611558	-7.67	-7.49	1.02403	0.0342609	0.00755845
LOC611559	-7.62	-7.39	1.03112	0.0442166	0.00975424
LOC611632	-6.8	-6.98	0.974212	-0.0376923	0.00831532
LOC611648	-7.84	-7.66	1.0235	0.0335093	0.00739267
LOC611683	1.56	1.59	0.981132	-0.0274807	0.00606286
LOC611685	-7.82	-7.64	1.02356	0.033596	0.0074118
LOC611707	-7.79	-7.61	1.02365	0.0337269	0.00744067
LOC611721	-4.08	-4.13	0.987893	-0.0175726	0.00387705
LOC611742	-4.66	-4.64	1.00431	0.00620515	0.00136907
LOC611757	-2.22	-2.17	1.02304	0.0328646	0.00725048
LOC611815	-7.64	-7.46	1.02413	0.034397	0.00758849
LOC611818	-5.26	-5.21333	1.00895	0.0128567	0.00283661
LOC611882	-7.62	-7.43	1.02557	0.0364288	0.00803663
LOC611957	-7.44	-7.21	1.0319	0.0453034	0.00999389
LOC611968	-7.77	-7.57	1.02642	0.0376213	0.00829966
LOC611988	-4.56	-4.5	1.01333	0.0191088	0.00421596
LOC612043	-2.05	-2.06	0.995146	-0.00702043	0.00154895
LOC612107	-7.64	-7.41	1.03104	0.0440991	0.00972832
LOC612108	-7.86	-7.68	1.02344	0.033423	0.00737364
LOC612196	-7.8	-7.58	1.02902	0.0412763	0.00910577
LOC612202	-1.87	-1.845	1.01355	0.0194175	0.00428405
LOC612233	-7.8	-7.63	1.02228	0.0317911	0.00701367
LOC612234	-7.87	-7.69	1.02341	0.03338	0.00736417
LOC612238	-7.84	-7.65	1.02484	0.0353939	0.00780837
LOC612254	-5.91	-6.08	0.972039	-0.0409132	0.0090257
LOC612269	-7.81	-7.63	1.02359	0.0336395	0.0074214
LOC612302	-3.42	-3.5	0.977143	-0.0333586	0.00735944
LOC612339	6.15	6.21	0.990338	-0.0140069	0.00309036
LOC612357	-6.29	-6.32	0.995253	-0.00686454	0.00151456
LOC612516	-5.55	-5.4	1.02778	0.0395284	0.00872027
LOC612534	-7.34	-7.21	1.01803	0.0257808	0.00568786
LOC612576	-5.66	-5.59	1.01252	0.0179538	0.00396114
LOC612640	-4.86	-4.75	1.02316	0.0330288	0.00728669
LOC612672	-7.51	-7.59	0.98946	-0.015287	0.00337279
LOC612694	-7.73	-7.55	1.02384	0.0339918	0.0074991
LOC612966	0.69	0.68	1.01471	0.0210616	0.00464678
LOC612968	6.335	6.205	1.02095	0.0299134	0.00659949
LOH12CR1	-1.91	-1.89	1.01058	0.0151864	0.0033506
LPXN	-5.54	-5.69	0.973638	-0.0385427	0.00850288
LRBA	-0.36	-0.356667	1.00935	0.0134205	0.002961
LRFN5	-7.56	-7.39	1.023	0.0328119	0.00723884
LRGUK	-7.52	-7.36	1.02174	0.0310269	0.00684511
LRP1B	-7.72	-7.515	1.02728	0.0388277	0.00856575
LRP2	-2.64667	-2.60333	1.01665	0.0238165	0.00525452
LRRC14B	-7.37	-7.15	1.03077	0.0437214	0.00964502
LRRC4	-3.67	-3.605	1.01803	0.0257808	0.00568786
LRRC4B	-7.7	-7.49	1.02804	0.0398927	0.00880063
LRRC4C	-7.27	-7.495	0.96998	-0.0439731	0.00970053
LRRC55	-7.86	-7.65	1.02745	0.0390696	0.00861908
LRRC6	-7.21	-7.03	1.0256	0.0364746	0.00804673
LRRC67	-7.66	-7.48	1.02406	0.0343061	0.00756844
LRRC8E	-7.8	-7.57	1.03038	0.0431808	0.0095258
LRRN1	-7.43	-7.545	0.984758	-0.0221587	0.0048888
LRRTM1	-4.34	-4.45	0.975281	-0.0361103	0.00796638
LRRTM4	-7.51	-7.34	1.02316	0.0330328	0.00728758
LRSAM1	-3.52	-3.48	1.01149	0.0164881	0.00363779
LRWD1	-0.63	-0.646667	0.974227	-0.0376704	0.00831049
LSM6	4.33	4.42	0.979638	-0.0296793	0.00654786
LTBP3	-1.405	-1.42	0.989437	-0.0153208	0.00338025
LTBP4	-2.98	-2.925	1.0188	0.0268757	0.00592939
LUM	-2.225	-2.215	1.00451	0.00649864	0.00143383
LY6G5C	-7.64	-7.44	1.02688	0.03827	0.00844274
LYG1	-7.67	-7.5	1.02267	0.032336	0.00713387
LYPLA1	-7.67	-7.45	1.02953	0.0419862	0.00926233
LYZL1	-7.695	-7.51	1.02463	0.0351084	0.0077454
LZTR1	-4.43	-4.41	1.00454	0.00652804	0.00144031
MACC1	-7.65	-7.46	1.02547	0.0362841	0.00800472
MAEL	-7.57	-7.34	1.03134	0.0445132	0.00981965
MAGEB1	-7.24333	-7.22333	1.00277	0.00398902	0.000880119
MAMDC2	-6.73	-6.8	0.989706	-0.0149282	0.00329364
MAN2A1	2.38	2.32	1.02586	0.0368368	0.00812662
MAN2B1	2.07333	2.05333	1.00974	0.0139842	0.00308537
MANEA	-3.03	-3.1	0.977419	-0.0329504	0.0072694
MAOA	4.225	4.185	1.00956	0.0137237	0.0030279
MAP3K6	-1.575	-1.61	0.978261	-0.0317089	0.00699554
MAP6	-4.82	-4.85	0.993814	-0.0089516	0.00197503
MAPK12	-7.58	-7.41	1.02294	0.0327243	0.00721953
MAPK4	-7.48	-7.39	1.01218	0.0174639	0.00385307
43160	-5.32	-5.34	0.996255	-0.0054135	0.00119441
MARK3	0.545	0.555	0.981982	-0.0262315	0.00578729
MATN3	-7.82	-7.63	1.0249	0.0354855	0.00782859
MB	-5.14	-5.01333	1.02527	0.0359982	0.00794166
MC3R	-7.86	-7.67	1.02477	0.0353027	0.00778826
MC4R	-4.35	-4.31	1.00928	0.0133275	0.00294049
MC5R	-7.88	-7.69	1.02471	0.035212	0.00776826
MCF2	-6.02	-5.85	1.02906	0.0413269	0.00911693
MCF2L2	-5.1	-4.985	1.02307	0.0329037	0.00725911
MCFD2	5.04	5.06	0.996047	-0.00571365	0.00126063
MCHR1	-7.8	-7.63	1.02228	0.0317911	0.00701367
MCHR2	-7.78	-7.58	1.02639	0.0375723	0.00828885
MCOLN1	-4.19	-4.15	1.00964	0.0138389	0.00305331
MCOLN3	-7.84	-7.66	1.0235	0.0335093	0.00739267
MDGA1	-4.075	-4.175	0.976048	-0.0349761	0.00771623
MDH1	5.33	5.2	1.025	0.0356239	0.0078591
MED26	-5.14	-5.09	1.00982	0.0141027	0.00311151
MED8	1.955	1.915	1.02089	0.0298242	0.00657982
MEGF10	-6.08	-5.96	1.02013	0.028759	0.00634484
MEPE	-7.88	-7.68	1.02604	0.0370893	0.00818232
MET	-3.53	-3.525	1.00142	0.00204493	0.000451183
MFAP5	-7.83	-7.65	1.02353	0.0335526	0.00740222
MFSD6	-2.14	-2.19	0.977169	-0.0333201	0.00735094
MGAT4C	-7.72	-7.51333	1.02751	0.0391477	0.00863632
MGST1	5.82333	5.68	1.02523	0.0359543	0.00793197
MIA	-4.65	-4.78	0.972803	-0.0397799	0.00877575
MLL	-2.12667	-2.16	0.984568	-0.0224374	0.00495029
MLNR	-7.58	-7.35	1.03129	0.0444536	0.00980649
MLST8	-2.59	-2.63	0.984791	-0.0221107	0.00487822
MMP13	-6.45	-6.5	0.992308	-0.0111406	0.00245798
MMP27	-7.76	-7.58	1.02375	0.0338588	0.00746977
MOBKL1A	-3.3	-3.4	0.970588	-0.0430687	0.00950108
MOBP	-7.6	-7.4	1.02703	0.0384741	0.00848776
MOCS2	4.41	4.39	1.00456	0.00655772	0.00144686
MPL	-7.83	-7.62	1.02756	0.0392213	0.00865255
MRAP	-7.79	-7.6	1.025	0.0356239	0.0078591
MRGPRF	-3.89	-3.91	0.994885	-0.00739845	0.00163235
MRPS36	3.2675	3.355	0.97392	-0.0381255	0.00841087
MS4A5	-7.64	-7.42	1.02965	0.0421535	0.00929923
MS4A6A	-7.69	-7.5	1.02533	0.036093	0.00796257
MSH4	-7.75	-7.52	1.03059	0.0434636	0.00958818
MSI1	-7.78	-7.61	1.02234	0.0318737	0.0070319
MSTN	-7.48	-7.33	1.02046	0.0292251	0.00644765
MTA2	-2.16	-2.13	1.01408	0.0201779	0.00445181
MTBP	-5.105	-5.025	1.01592	0.0227874	0.00502749
MTL5	-7.53	-7.36	1.0231	0.0329441	0.00726801
MTMR1	-1.765	-1.75	1.00857	0.0123133	0.00271671
MTMR2	-5.12	-4.98	1.02811	0.0399981	0.00882387
MTMR7	-7.88	-7.67	1.02738	0.0389691	0.00859691
MTR	-4.76	-4.86	0.979424	-0.0299947	0.00661743
MTRF1L	-7.35	-7.22	1.01801	0.0257454	0.00568005
MUC1	-4.87	-4.8	1.01458	0.0208874	0.00460834
MUC5AC	-3.36	-3.34	1.00599	0.00861313	0.00190035
MUC6	-7.81	-7.62	1.02493	0.0355316	0.00783873
MUL1	-2.63	-2.64	0.996212	-0.00547513	0.00120801
MURC	-7.88	-7.69	1.02471	0.035212	0.00776826
MVK	-2.03	-2	1.015	0.0214797	0.00473902
MYBPC1	-6.755	-6.74	1.00223	0.00320718	0.000707617
MYBPHL	-7.65	-7.47	1.0241	0.0343515	0.00757845
MYEF2	-6.02	-5.93	1.01518	0.0217314	0.00479454
MYF5	-7.83	-7.63	1.02621	0.0373293	0.00823524
MYH1	-6.67	-6.572	1.01491	0.0213543	0.00471134
MYH7B	-5.69333	-5.76333	0.987854	-0.0176299	0.00388969
MYL1	-6.24667	-6.26833	0.996543	-0.00499535	0.00110215
MYLK3	-6.16	-6.05	1.01818	0.0259952	0.00573516
MYLK4	-7.77	-7.56	1.02778	0.0395284	0.00872027
MYO18B	-5.16	-5.16333	0.999354	-0.000931673	0.00020556
MYO5C	-3.39	-3.34	1.01497	0.0214372	0.00472963
MYOM3	-7.62	-7.41	1.02834	0.0403175	0.00889431
N4BP2L1	-3.64	-3.55333	1.02439	0.0347654	0.00766975
NAA25	-4.05	-3.99	1.01504	0.0215332	0.00475081
NAA40	-3.94667	-3.82667	1.03136	0.0445464	0.00982697
NAALADL2	-4.53	-4.41	1.02721	0.0387324	0.00854472
NAB1	-0.32	-0.33	0.969697	-0.0443941	0.00979338
NANOG	-7.8	-7.62	1.02362	0.0336831	0.00743102
NANOS2	-1.95	-1.9	1.02632	0.0374747	0.00826732
NCKAP5L	-7.44	-7.23	1.02905	0.041307	0.00911254
NCOA3	-2.92	-2.96	0.986486	-0.0196288	0.00433068
NCOA5	-3.495	-3.48	1.00431	0.00620515	0.00136907
NDFIP1	3.33667	3.32667	1.00301	0.00433025	0.000955407
NDOR1	-0.35	-0.34	1.02941	0.0418202	0.00922573
NDP	-5.04	-4.91	1.02648	0.0377007	0.00831717
NDRG4	-7.65	-7.47	1.0241	0.0343515	0.00757845
NDST4	-7.76	-7.53	1.03054	0.0434068	0.00957564
NDUFB7	5.94	5.83	1.01887	0.026967	0.00594954
NDUFS5	6.61	6.46	1.02322	0.0331161	0.00730595
NEDD1	-1.86	-1.84	1.01087	0.0155969	0.00344115
NEK1	-4.73	-4.61	1.02603	0.0370734	0.00817882
NEU2	-4.51	-4.39	1.02733	0.0389065	0.00858312
NEUROD2	-4.76	-4.91	0.96945	-0.0447615	0.00987439
NFE2L1	-2.12	-2.125	0.997647	-0.00339858	0.000749846
NIPAL1	-6.92	-6.73	1.02823	0.0401655	0.0088608
NIPAL2	-2.2	-2.15	1.02326	0.0331669	0.00731715
NIPAL4	-5.02	-5.09	0.986248	-0.0199783	0.00440778
NIPSNAP3A	-5.71	-5.68	1.00528	0.00759982	0.00167678
NKAIN4	-6.58	-6.38	1.03135	0.0445312	0.0098236
NKD1	-7.61	-7.44	1.02285	0.0325938	0.00719075
NKX3-1	-2.72	-2.69	1.01115	0.0160005	0.0035302
NLGN2	-7.77	-7.57	1.02642	0.0376213	0.00829966
NLGN3	-7.48	-7.33	1.02046	0.0292251	0.00644765
NLGN4X	-4.1	-4.21	0.973872	-0.0381963	0.00842648
NLN	-4.46	-4.44	1.0045	0.00648403	0.0014306
NLRP10	-7.51	-7.29	1.03018	0.0428941	0.00946257
NMU	-6.05	-6.01	1.00666	0.00957015	0.0021115
NNAT	-3.53667	-3.47	1.01921	0.0274546	0.00605709
NOC3L	-1.72	-1.74	0.988506	-0.0166787	0.00367984
NOLC1	-1.51	-1.5	1.00667	0.00958605	0.00211501
NOS2	-5.42667	-5.36	1.01244	0.0178333	0.00393456
NOSIP	0.52	0.516667	1.00645	0.00927781	0.002047
NOTUM	-5.68	-5.86	0.969283	-0.0450097	0.00992914
NOX4	-4.97	-5.02	0.99004	-0.0144415	0.00318626
NPHS2	-7.53	-7.36	1.0231	0.0329441	0.00726801
NPSR1	-7.53	-7.37	1.02171	0.0309852	0.00683592
NRD1	-4.74	-4.75	0.997895	-0.00304045	0.000670832
NRF1	-3.985	-3.88	1.02706	0.0385231	0.00849855
NRG3	-7.675	-7.495	1.02402	0.0342383	0.00755347
NRGN	-1.0025	-1.01	0.992574	-0.0107531	0.00237249
NRXN3	-4.22	-4.32	0.976852	-0.0337883	0.00745422
NSL1	-4.885	-4.865	1.00411	0.00591876	0.00130588
NT5C1A	-6.94	-6.76	1.02663	0.0379124	0.00836387
NTF4	-5.37	-5.29	1.01512	0.0216544	0.00477754
NTRK1	-7.54	-7.58	0.994723	-0.00763332	0.00168418
NTRK3	-7.61	-7.48	1.01738	0.0248582	0.00548433
NUBP2	2.685	2.62	1.02481	0.0353553	0.00779985
NUBPL	-4.53	-4.44	1.02027	0.0289514	0.00638728
NUDT13	-3.97667	-3.94	1.00931	0.013364	0.00294853
NXPH1	-5.67	-5.69	0.996485	-0.00507992	0.00112081
OASL	1.96	1.94	1.01031	0.014797	0.00326469
OAZ1	5.805	5.85	0.992308	-0.0111406	0.00245798
ODAM	-7.55	-7.38	1.02304	0.0328558	0.00724854
ODF1	-7.815	-7.63	1.02425	0.0345628	0.00762506
ODZ2	-7.52	-7.3	1.03014	0.0428362	0.0094498
OLFM2	-5.22	-5.15	1.01359	0.0194774	0.00429727
OLFM3	-5.51	-5.5	1.00182	0.0026207	0.000578219
OPALIN	-7.76	-7.575	1.02442	0.0348108	0.00767975
OPN4	-3.32	-3.36	0.988095	-0.017278	0.00381205
OPN5	-7.54	-7.31	1.03146	0.0446931	0.00985932
OR04B08	-7.57	-7.35	1.02993	0.042549	0.00938647
OR04C09	-6.76	-6.565	1.0297	0.0422282	0.00931572
OR04E05	-6.44	-6.48	0.993827	-0.00893313	0.00197095
OR04E07	-7.8	-7.63	1.02228	0.0317911	0.00701367
OR08C06	-7.85	-7.64	1.02749	0.03912	0.00863021
OR08C09	-7.78	-7.58	1.02639	0.0375723	0.00828885
OR08D04	-6.88333	-6.74	1.02127	0.0303588	0.00669773
OR08D06	-7.64	-7.46	1.02413	0.034397	0.00758849
OR08H06	-7.65	-7.45	1.02685	0.0382193	0.00843156
OR08H09	-7.69	-7.52	1.02261	0.0322509	0.00711511
OR10F05	-7.59	-7.42	1.02291	0.0326807	0.00720991
OR10G10	-7.7	-7.48	1.02941	0.0418202	0.00922573
OR12E11	-7.55	-7.32	1.03142	0.044633	0.00984606
OR16B12	-7.775	-7.57	1.02708	0.0385494	0.00850435
OR16F12	-7.33	-7.54	0.972149	-0.0407513	0.00899
OR18C09	-7.8	-7.57	1.03038	0.0431808	0.0095258
OR26A01	-7.84	-7.66	1.0235	0.0335093	0.00739267
OR28D07	-7.6	-7.38	1.02981	0.0423786	0.00934888
OR2C1	-7.73	-7.54	1.0252	0.0359039	0.00792086
OR4A15	-7.75	-7.58	1.02243	0.0319985	0.00705942
OR4C12	-7.72	-7.55	1.02252	0.0321242	0.00708716
OR51M1	-7.64	-7.47	1.02276	0.0324644	0.0071622
OR52E6	-7.8	-7.62	1.02362	0.0336831	0.00743102
OR5J2	-7.79	-7.58	1.0277	0.0394255	0.00869758
OR5T1	-7.42	-7.2	1.03056	0.0434223	0.00957905
OR6M1	-7.68	-7.49	1.02537	0.0361406	0.00797307
OR8A1	-4.58	-4.6	0.995652	-0.00628626	0.00138697
OR8B4	-7.65	-7.47	1.0241	0.0343515	0.00757845
OR8D2	-7.66	-7.48	1.02406	0.0343061	0.00756844
OR8U1	-7.63	-7.45	1.02416	0.0344426	0.00759855
OR9G4	-4.45	-4.33	1.02771	0.0394383	0.00870041
OSGIN2	-2.36	-2.41	0.979253	-0.0302463	0.00667292
OSTF1	3.23	3.33	0.96997	-0.043988	0.00970382
OTOA	-7.55	-7.39	1.02165	0.0309023	0.00681762
OTUD6A	-7.77	-7.59	1.02372	0.0338147	0.00746005
OTX2	-7.31	-7.19	1.01669	0.0238796	0.00526846
OVCA2	1.30667	1.32	0.989899	-0.0146468	0.00323154
OVCH2	-7.79	-7.61	1.02365	0.0337269	0.00744067
OVOL1	-4.74	-4.62	1.02597	0.0369942	0.00816134
P2RX5	-4.335	-4.285	1.01167	0.0167368	0.00369265
PABPN1	1.65	1.6975	0.972018	-0.0409455	0.00903283
PANK4	-2.77333	-2.83	0.979976	-0.029181	0.00643793
PANX3	-7.66	-7.49	1.0227	0.0323787	0.00714329
PAQR3	-4.08	-4.1	0.995122	-0.00705476	0.00155652
PASD1	-7.79	-7.59	1.02635	0.0375234	0.00827807
PCBP1	4.215	4.165	1.012	0.0172161	0.0037984
PCBP2	-2.94	-3.01	0.976744	-0.0339473	0.0074893
PCDH19	-7.81	-7.64	1.02225	0.0317499	0.0070046
PCDH8	-3.035	-3.02	1.00497	0.00714797	0.00157709
PCDH9	-7.6	-7.37	1.03121	0.0443348	0.0097803
PCDHA1	-4.42	-4.56	0.969298	-0.0449875	0.00992423
PCDHA5	-7.6	-7.42	1.02426	0.0345802	0.0076289
PCDHA6	-7.4	-7.26	1.01928	0.0275557	0.0060794
PCDHGB5	-4.77	-4.84	0.985537	-0.0210178	0.00463711
PCDHGB6	-7.86	-7.66	1.02611	0.0371849	0.00820341
PCGF1	4.86	4.94	0.983806	-0.0235547	0.00519678
PCNT	-7.46	-7.23	1.03181	0.04518	0.00996668
PCSK1	-5.02	-5.13	0.978558	-0.0312715	0.00689906
PCYT1B	-7.74	-7.55	1.02517	0.0358569	0.0079105
PDC	-7.025	-7.16	0.981145	-0.0274614	0.00605859
PDCL2	-7.59	-7.43	1.02153	0.0307377	0.00678131
PDE11A	-6.17	-6.06	1.01815	0.0259527	0.00572578
PDE4B	-6.41	-6.27	1.02233	0.0318589	0.00702864
PDE4D	-3.68	-3.63	1.01377	0.0197362	0.00435438
PDE7A	-3.74	-3.69	1.01355	0.0194175	0.00428405
PDE7B	-7.49	-7.32	1.02322	0.0331221	0.00730727
PDE8A	-3.19	-3.15	1.0127	0.0182046	0.00401648
PDILT	-7.63	-7.61	1.00263	0.0037866	0.000835459
PDP1	-4.47	-4.61	0.969631	-0.0444919	0.00981495
PDS5B	-1.135	-1.14	0.995614	-0.00634153	0.00139916
PDYN	-7.69	-7.5	1.02533	0.036093	0.00796257
PDZD11	2.01	1.96	1.02551	0.0363418	0.00801746
PDZD2	-7.86	-7.67	1.02477	0.0353027	0.00778826
PDZD8	-2.77	-2.75	1.00727	0.0104544	0.00230658
PEF1	-4.06	-3.99	1.01754	0.025091	0.00553568
PELI1	2.44	2.48	0.983871	-0.023459	0.00517566
PELI2	-5.25	-5.12	1.02539	0.0361736	0.00798035
PEPD	6.585	6.745	0.976279	-0.034635	0.00764098
PEX1	-1.07	-1.08	0.990741	-0.0134205	0.002961
PEX10	-3.71	-3.77	0.984085	-0.0231453	0.00510647
PFN4	-7.56	-7.33	1.03138	0.044573	0.00983283
PGB	-5.71	-5.79	0.986183	-0.0200726	0.00442859
PGGT1B	-4.44	-4.45	0.997753	-0.00324566	0.000716107
PGK2	-7.68	-7.49	1.02537	0.0361406	0.00797307
PGLYRP1	-7.72	-7.54	1.02387	0.0340363	0.00750893
PGRMC1	3.54	3.515	1.00711	0.0102247	0.00225591
PHF16	-5.88	-5.76	1.02083	0.0297473	0.00656286
PHF5A	2.155	2.1	1.02619	0.0372985	0.00822847
PHKA2	-1.805	-1.765	1.02266	0.0323307	0.0071327
PI15	-7.86	-7.65	1.02745	0.0390696	0.00861908
PIAS4	-4.5	-4.41	1.02041	0.0291463	0.00643028
PIGA	-4.93	-5.06	0.974308	-0.0375497	0.00828387
PIK3AP1	-4.89	-5	0.978	-0.0320936	0.00708041
PIM2	-4.98	-4.85	1.0268	0.038161	0.00841869
PKD2L1	-7.69	-7.51	1.02397	0.0341707	0.00753857
PKDREJ	-6.43	-6.275	1.0247	0.0352033	0.00776633
PKIA	-6.73	-6.695	1.00523	0.00752245	0.00165971
PKP1	-4.78	-4.71	1.01486	0.0212836	0.00469574
PLA2G4D	-7.74	-7.55	1.02517	0.0358569	0.0079105
PLCXD1	-5.23	-5.1	1.02549	0.0363137	0.00801125
PLCXD3	-7.77	-7.59	1.02372	0.0338147	0.00746005
PLD5	-7.56	-7.39	1.023	0.0328119	0.00723884
PLD6	-7.66	-7.44	1.02957	0.0420418	0.0092746
PLEKHO2	-4.62	-4.72333	0.978123	-0.0319125	0.00704046
PLSCR3	-3.41	-3.37	1.01187	0.0170231	0.00375583
PLUNC	-7.6	-7.37	1.03121	0.0443348	0.0097803
PM20D2	-5.935	-5.82	1.01976	0.0282289	0.0062279
PMCH	-7.76	-7.58	1.02375	0.0338588	0.00746977
PMM2	-2.84	-2.92	0.972603	-0.0400774	0.00884137
PNLIPRP1	-6.99	-6.89667	1.01353	0.0193932	0.00427871
PNPLA1	-7.86	-7.68	1.02344	0.033423	0.00737364
PNPLA5	-7.82	-7.64	1.02356	0.033596	0.0074118
PNPLA7	2.365	2.38	0.993697	-0.00912139	0.00201249
POC1B	-2.66	-2.635	1.00949	0.0136233	0.00300574
POGZ	-4.07	-4.08	0.997549	-0.00354036	0.000781128
POLE3	0.91	0.89	1.02247	0.0320612	0.00707326
PON1	-7.85	-7.66	1.0248	0.0353483	0.0077983
POT1	-1.68	-1.65667	1.01408	0.0201779	0.00445181
POU4F2	-7.75	-7.52	1.03059	0.0434636	0.00958818
PPAPDC1A	-3.75	-3.76	0.99734	-0.00384207	0.000847696
PPAT	-3.05	-3.09	0.987055	-0.0187976	0.0041473
PPBP	-4.29	-4.405	0.973893	-0.0381644	0.00841944
PPFIA2	-7.18	-7.28	0.986264	-0.0199546	0.00440256
PPIH	-2.48	-2.495	0.993988	-0.0086997	0.00191945
PPOX	3.08	3.02	1.01987	0.0283818	0.00626163
PPP1R14C	-7.39667	-7.25667	1.01929	0.0275683	0.00608217
PPP1R3A	-7.77	-7.54	1.0305	0.0433501	0.00956313
PPP1R3C	-7.53	-7.38	1.02033	0.029029	0.00640441
PPP2R2C	-7.8	-7.63	1.02228	0.0317911	0.00701367
PPP3CC	-2.87	-2.86	1.0035	0.00503559	0.00111103
PPP4R4	-7.69	-7.48	1.02807	0.0399453	0.00881224
PPPDE1	-3.315	-3.33	0.995495	-0.00651331	0.00143706
PPTC7	-2.08	-2.1	0.990476	-0.0138058	0.003046
PRCC	-2.61	-2.67	0.977528	-0.0327899	0.007234
PREP	-0.84	-0.845	0.994083	-0.00856201	0.00188907
PREX2	-4.76	-4.88	0.97541	-0.0359196	0.00792432
PRKAR1A	-3.3475	-3.41	0.981672	-0.0266877	0.00588792
PRKCA	-4.82	-4.85	0.993814	-0.0089516	0.00197503
PRM3	-7.36	-7.15	1.02937	0.0417625	0.00921301
PRMT3	-1.39333	-1.41333	0.985849	-0.0205613	0.00453641
PRMT6	-3.31	-3.41	0.970674	-0.0429405	0.00947281
PRMT8	-7.77	-7.57	1.02642	0.0376213	0.00829966
PROCA1	-5.34	-5.51	0.969147	-0.0452126	0.00997387
PRODH2	-3.61	-3.6	1.00278	0.00400193	0.000882967
PROX1	-4.08	-4.16	0.980769	-0.0280144	0.00618058
PRR11	-4.45	-4.52	0.984513	-0.0225174	0.00496795
PRR12	-3.72667	-3.62333	1.02852	0.0405682	0.00894962
PRR22	-5.62	-5.56	1.01079	0.0154852	0.00341653
PRR5L	-7.69	-7.51	1.02397	0.0341707	0.00753857
PRSS3	-6.47833	-6.3	1.02831	0.0402709	0.00888403
PRSS36	-7.85	-7.67	1.02347	0.0334661	0.00738315
PRSS37	-7.85	-7.64	1.02749	0.03912	0.00863021
PRSS38	-7.43	-7.28	1.0206	0.0294238	0.00649148
PSAP	3.286	3.312	0.99215	-0.0113702	0.00250864
PSKH2	-7.77	-7.59	1.02372	0.0338147	0.00746005
PSMA8	-7.71	-7.48	1.03075	0.0436926	0.00963867
PSMB11	-7.77	-7.59	1.02372	0.0338147	0.00746005
PSMB8	4.14	4.17	0.992806	-0.0104166	0.00229826
PSMB9	6.98	7.12	0.980337	-0.0286502	0.00632084
PSMD2	4.38	4.26	1.02817	0.0400774	0.00884137
PSMD4	3.78	3.75	1.008	0.0114956	0.00253632
PSME2	5.9	5.795	1.01812	0.0259063	0.00571554
PSPN	-3.56	-3.47	1.02594	0.0369416	0.00814974
PTBP1	-2.26667	-2.27667	0.995608	-0.00635083	0.00140122
PTCH2	-7.7	-7.51	1.0253	0.0360455	0.0079521
PTCHD1	-7.32	-7.21	1.01526	0.0218444	0.00481947
PTGDR	1.29	1.27	1.01575	0.0225426	0.00497349
PTH	-7.7	-7.49	1.02804	0.0398927	0.00880063
PTHLH	-7.27	-7.31	0.994528	-0.00791604	0.00174655
PTK2	-2.8	-2.722	1.02866	0.0407598	0.00899186
PTPDC1	-4.67	-4.63	1.00864	0.0124104	0.00273813
PTPRN	-4.325	-4.34	0.996544	-0.00499491	0.00110205
PTPRO	-7.54	-7.55	0.998675	-0.00191212	0.000421882
PTPRU	-7.79	-7.57	1.02906	0.04133	0.00911763
PUM1	2.385	2.46	0.969512	-0.044669	0.00985401
PVRL4	-7.75	-7.56	1.02513	0.0358101	0.00790017
PXK	-1.61	-1.58333	1.01684	0.0240957	0.00531612
QRFPR	-7.81	-7.59	1.02899	0.0412227	0.00909395
QTRTD1	-5.54	-5.59	0.991055	-0.0129623	0.00285991
RAB14	3.65667	3.59667	1.01668	0.0238687	0.00526604
RAB3C	-7.77	-7.57	1.02642	0.0376213	0.00829966
RAB6B	-7.8	-7.63	1.02228	0.0317911	0.00701367
RABL3	-1.95	-1.9	1.02632	0.0374747	0.00826732
RAD51L1	-3.48	-3.59	0.969359	-0.0448965	0.00990418
RALYL	-7.39	-7.625	0.96918	-0.045163	0.00996293
RAMP3	-5.8	-5.77	1.0052	0.00748158	0.0016507
RANBP17	-3.27667	-3.23667	1.01236	0.0177201	0.00390959
RANBP6	-4.46	-4.42	1.00905	0.0129973	0.00286764
RAP1GAP2	-3.06	-2.97	1.0303	0.0430687	0.00950108
RAP2C	-3.11	-3.04	1.02303	0.0328433	0.00724577
RASD1	-4.49	-4.36	1.02982	0.0423873	0.0093508
RASSF9	-5.33	-5.43	0.981584	-0.0268167	0.00591637
RAX2	-7.86	-7.68	1.02344	0.033423	0.00737364
RBBP4	-3.14	-3.09	1.01618	0.0231577	0.0051092
RBM10	4.23	4.18	1.01196	0.0171547	0.00378485
RBM23	-2.735	-2.78	0.983813	-0.0235441	0.00519443
RBM25	1.84	1.86	0.989247	-0.0155969	0.00344115
RBM26	-3.25667	-3.20667	1.01559	0.0223217	0.00492476
RBM34	1.88	1.85	1.01622	0.0232074	0.00512016
RCAN2	-1.905	-1.89	1.00794	0.0114048	0.00251627
RCAN3	-3.65	-3.7	0.986486	-0.0196288	0.00433068
RCOR2	-7.88	-7.7	1.02338	0.0333372	0.00735472
RECQL	-1.41	-1.39	1.01439	0.0206103	0.00454721
RERGL	-7.53	-7.3	1.03151	0.0447534	0.00987261
REV1	-2.47667	-2.54333	0.973788	-0.0383208	0.00845395
RFFL	-5.36	-5.4	0.992593	-0.0107264	0.00236661
RFWD3	-7.8	-7.63	1.02228	0.0317911	0.00701367
RFX4	-6.3275	-6.135	1.03138	0.0445723	0.00983266
RFX6	-4.67	-4.61	1.01302	0.0186558	0.00411602
RG9MTD2	-2.73	-2.72	1.00368	0.0052943	0.00116811
RGS9	-4.26	-4.15	1.02651	0.0377421	0.0083263
RHBDL3	-4.48	-4.39	1.0205	0.0292778	0.00645928
RHO	-6.505	-6.315	1.03009	0.0427663	0.00943439
RIBC2	-7.88	-7.7	1.02338	0.0333372	0.00735472
RIC3	-7.72	-7.54	1.02387	0.0340363	0.00750893
RIMS1	-7.41	-7.19	1.0306	0.0434818	0.00959217
RNASE10	-7.81	-7.59	1.02899	0.0412227	0.00909395
RNASET2	6.64	6.71	0.989568	-0.0151295	0.00333805
RNF181	2.32	2.33	0.995708	-0.00620515	0.00136907
RNF182	-7.59	-7.36	1.03125	0.0443941	0.00979338
RNGTT	-2.575	-2.515	1.02386	0.034014	0.00750401
ROPN1	-7.88	-7.7	1.02338	0.0333372	0.00735472
RORA	-4.69	-4.65	1.0086	0.0123572	0.00272641
RPL22L1	4.36667	4.38	0.996956	-0.00439846	0.000970456
RPLP1	5.35	5.2225	1.02441	0.0347983	0.007677
RPRD2	-2.255	-2.235	1.00895	0.0128526	0.0028357
RPS6KA6	-7.68	-7.46	1.02949	0.0419307	0.0092501
RRAGB	-5.58	-5.7	0.978947	-0.0306968	0.0067723
RRH	-7.67	-7.44	1.03091	0.043924	0.00968969
RRP1	2.85	2.77	1.02888	0.0410759	0.00906159
RRP8	-0.92	-0.91	1.01099	0.0157673	0.00347876
RSPH1	-7.84	-7.64	1.02618	0.037281	0.0082246
RSPH4A	-7.82	-7.6	1.02895	0.0411692	0.00908216
RTDR1	-7.49	-7.33	1.02183	0.0311525	0.00687282
RTF1	-2.74	-2.75	0.996364	-0.00525573	0.0011596
RTP1	-7.81	-7.59	1.02899	0.0412227	0.00909395
RUFY1	-5.035	-4.96	1.01512	0.0216517	0.00477695
S100G	2.26	2.27	0.995595	-0.00636953	0.00140534
SAAL1	-1.995	-2.05	0.973171	-0.0392352	0.00865561
SACS	-2.7225	-2.69	1.01208	0.0173259	0.00382261
SAFB	-1.31	-1.33	0.984962	-0.0218594	0.00482278
SAMD3	-7.62	-7.4	1.02973	0.0422657	0.00932399
SAMD7	-7.46	-7.32	1.01913	0.027332	0.00603005
SAP130	-2.56	-2.58	0.992248	-0.0112273	0.00247711
SARM1	-4.93	-4.89	1.00818	0.0117532	0.00259314
SBF2	-4.13	-4.2	0.983333	-0.0242475	0.00534962
SCAMPER	-7.84	-7.66	1.0235	0.0335093	0.00739267
SCLT1	-3.65	-3.75	0.973333	-0.0389941	0.00860245
SCN2A	-6.52	-6.66	0.978979	-0.0306502	0.00676202
SCN3B	-7.39	-7.46	0.990617	-0.0136013	0.00300088
SCPEP1	1.81	1.83333	0.987273	-0.0184794	0.00407711
SCRN1	-7.8	-7.62	1.02362	0.0336831	0.00743102
SDHC	4.77667	4.64333	1.02872	0.0408434	0.00901029
SDR9C7	-7.55	-7.33	1.03001	0.0426634	0.0094117
SEC13	3.895	3.85	1.01169	0.0167649	0.00369885
SEC14L4	-7.71	-7.48	1.03075	0.0436926	0.00963867
SEC61A1	2.67	2.6	1.02692	0.0383281	0.00845555
SEL1L	0.9	0.89	1.01124	0.0161197	0.0035565
SELE	-5.28	-5.305	0.995287	-0.00681482	0.00150359
SELT	2.92667	2.96333	0.987627	-0.0179625	0.00396306
SEMA3A	-4.21	-4.32	0.974537	-0.0372111	0.00820918
SENP3	-0.72	-0.7	1.02857	0.040642	0.00896588
SENP8	-4.29	-4.17	1.02878	0.0409303	0.00902946
43357	-7.8	-7.58	1.02902	0.0412763	0.00910577
43346	-7.66	-7.47	1.02544	0.0362361	0.00799414
43349	-2.32	-2.26	1.02655	0.037802	0.00833952
SEPW1	6.64	6.56	1.0122	0.0174874	0.00385825
SERPINA12	-7.88	-7.69	1.02471	0.035212	0.00776826
SERPINA7	-7.795	-7.605	1.02498	0.0356008	0.007854
SERPINB10	-7.79	-7.58	1.0277	0.0394255	0.00869758
SERPINB11	-7.79	-7.61	1.02365	0.0337269	0.00744067
SERPINB9	-5.03	-4.97	1.01207	0.0173125	0.00381967
SERTAD4	-6.23	-6.35	0.981102	-0.0275244	0.0060725
SETD8	-2.98	-2.91	1.02405	0.0342932	0.00756558
SEZ6	-7.72	-7.53	1.02523	0.035951	0.00793125
SEZ6L	-7.81	-7.65	1.02092	0.0298628	0.00658833
SF3B4	-3.895	-4.01	0.971322	-0.0419789	0.00926073
SFI1	-1.52	-1.51	1.00662	0.00952277	0.00210105
SFTPD	6.55	6.64	0.986446	-0.0196883	0.00434381
SGSM1	-7.7	-7.51	1.0253	0.0360455	0.0079521
SH3PXD2B	-3.65	-3.69	0.98916	-0.0157244	0.00346928
SHARPIN	3.04	3.105	0.979066	-0.0305219	0.00673373
SHB	-1.38	-1.35	1.02222	0.0317089	0.00699554
SIM1	-6.93	-6.91	1.00289	0.00416964	0.00091997
SIRPB2	-7.63	-7.46	1.02279	0.0325074	0.00717169
SLC16A12	-7.65	-7.43	1.02961	0.0420975	0.0092869
SLC16A2	-7.5	-7.34	1.0218	0.0311105	0.00686356
SLC17A3	-7.86	-7.68	1.02344	0.033423	0.00737364
SLC1A2	-4.1	-4.15	0.987952	-0.0174874	0.00385825
SLC22A1	-7.02667	-7	1.00381	0.00548554	0.0012103
SLC22A10	-5.72	-5.58	1.02509	0.03575	0.00788692
SLC22A2	-7.44	-7.64	0.973822	-0.03827	0.00844274
SLC23A2	-4.38	-4.41	0.993197	-0.00984779	0.00217276
SLC25A25	-4.74	-4.67	1.01499	0.0214645	0.00473566
SLC25A27	-6.48	-6.51	0.995392	-0.00666373	0.00147025
SLC25A41	-7.8	-7.63	1.02228	0.0317911	0.00701367
SLC26A7	-7.83	-7.65	1.02353	0.0335526	0.00740222
SLC26A9	-7.84	-7.66	1.0235	0.0335093	0.00739267
SLC2A11	-7.51	-7.31	1.02736	0.0389415	0.00859084
SLC2A12	-7.67	-7.49	1.02403	0.0342609	0.00755845
SLC2A3	-4.985	-4.87	1.02361	0.0336717	0.00742851
SLC2A4	-6.605	-6.53	1.01149	0.0164756	0.00363502
SLC30A9	-2.76	-2.69	1.02602	0.0370621	0.00817632
SLC35A2	-1.88	-1.86	1.01075	0.01543	0.00340435
SLC35B1	3.45	3.51	0.982906	-0.0248747	0.00548797
SLC35D3	-6.36	-6.3	1.00952	0.0136749	0.00301713
SLC35F3	-4.1	-4.085	1.00367	0.00528783	0.00116668
SLC38A4	-7.85	-7.67	1.02347	0.0334661	0.00738315
SLC38A6	-0.93	-0.92	1.01087	0.0155969	0.00344115
SLC41A1	-7.73	-7.56	1.02249	0.0320822	0.00707789
SLC45A3	-7.74	-7.51	1.03063	0.0435207	0.00960075
SLC4A1	-7.86	-7.68	1.02344	0.033423	0.00737364
SLC4A4	1.55	1.535	1.00977	0.0140296	0.00309537
SLC4A5	-6.69	-6.71	0.997019	-0.00430656	0.000950178
SLC6A15	-7.8	-7.63	1.02228	0.0317911	0.00701367
SLC6A6	-2.05	-2.08	0.985577	-0.0209596	0.00462428
SLC7A2	-7.88	-7.7	1.02338	0.0333372	0.00735472
SLC8A1	-4.78	-4.92	0.971545	-0.0416477	0.00918769
SLC9A11	-7.79	-7.56	1.03042	0.0432371	0.00953821
SLC9A2	-4.69	-4.61	1.01735	0.0248212	0.00547616
SLCO1A2	-7.715	-7.51	1.0273	0.0388532	0.00857137
SLIT1	-6.06	-6.25	0.9696	-0.0445384	0.0098252
SLIT2	-6.66	-6.85	0.972263	-0.0405818	0.00895261
SMAD1	-2.1375	-2.105	1.01544	0.0221042	0.00487678
SMARCAL1	-2.68	-2.67	1.00375	0.00539326	0.00118994
SMPD4	1.67	1.71	0.976608	-0.0341482	0.00753361
SMYD5	-6.58	-6.61	0.995461	-0.00656269	0.00144796
SNAPC1	1.7	1.71	0.994152	-0.00846158	0.00186691
SNCAIP	-4.72	-4.75	0.993684	-0.00914065	0.00201674
SNX21	-2.98	-2.97	1.00337	0.0048494	0.00106995
SNX3	4.775	4.745	1.00632	0.00909265	0.00200615
SNX31	-4.89	-5.03	0.972167	-0.0407239	0.00898396
SNX7	2.63	2.68	0.981343	-0.0271702	0.00599436
SOBP	-7.79	-7.56	1.03042	0.0432371	0.00953821
SOHLH2	-7.71	-7.53	1.0239	0.034081	0.00751878
SOX30	-7.44	-7.245	1.02692	0.0383169	0.00845309
SPACA3	-7.6	-7.42	1.02426	0.0345802	0.0076289
SPACA4	-7.6	-7.39	1.02842	0.0404251	0.00891804
SPAG11	-7.615	-7.435	1.02421	0.0345113	0.00761369
SPAG17	-7.84	-7.66	1.0235	0.0335093	0.00739267
SPAG6	-7.66	-7.45333	1.02773	0.0394586	0.00870489
SPAG7	5.375	5.45	0.986239	-0.0199915	0.00441069
SPATA24	1.46	1.45	1.0069	0.00991547	0.00218769
SPATA4	-7.81	-7.62	1.02493	0.0355316	0.00783873
SPECC1L	-5.83	-5.99	0.973289	-0.0390601	0.008617
SPEF2	-7.46	-7.31	1.02052	0.0293042	0.00646511
SPEG	-2.35	-2.375	0.989474	-0.0152668	0.00336833
SPEM1	-7.81	-7.63	1.02359	0.0336395	0.0074214
SPIN4	-7.39	-7.17	1.03068	0.0436012	0.00961852
SPO11	-6.02	-6.18	0.97411	-0.0378434	0.00834863
SPOCK2	-5.05	-5.06	0.998024	-0.002854	0.000629693
SPOPL	-1.05	-1.075	0.976744	-0.0339473	0.0074893
SPRY4	-5.97	-5.84	1.02226	0.0317626	0.00700739
SPRYD3	-3.4	-3.45	0.985507	-0.0210616	0.00464678
SPSB2	0.75	0.76	0.986842	-0.0191088	0.00421596
SPTBN2	-2.485	-2.55	0.97451	-0.0372514	0.00821807
SPTBN4	-7.59	-7.37	1.02985	0.0424353	0.00936138
SPZ1	-7.69	-7.51	1.02397	0.0341707	0.00753857
SRD5A1	-4.27667	-4.25667	1.0047	0.00676265	0.00149207
SREK1	-2.47	-2.51	0.984064	-0.0231763	0.0051133
SRSF2	-0.505	-0.5	1.01	0.0143553	0.00316724
SS18	-2.55	-2.6	0.980769	-0.0280144	0.00618058
SSBP3	-4.08	-3.98	1.02513	0.0358007	0.0078981
SSH1	-2.41	-2.38	1.01261	0.0180716	0.00398713
SSTR1	-7.29	-7.17	1.01674	0.0239457	0.00528303
ST18	-5.7	-5.84	0.976027	-0.0350065	0.00772291
ST3GAL3	-7.83	-7.65	1.02353	0.0335526	0.00740222
ST6GALNAC5	-7.87	-7.69	1.02341	0.03338	0.00736417
ST8SIA3	-7.77	-7.54	1.0305	0.0433501	0.00956313
ST8SIA6	-7.58	-7.42	1.02156	0.0307787	0.00679035
STAC	-7.79	-7.57	1.02906	0.04133	0.00911763
STC1	-4.61333	-4.62	0.998557	-0.00208332	0.000459653
STEAP1	-7.78	-7.6	1.02368	0.0337707	0.00745035
STEAP4	-7.7	-7.52	1.02394	0.0341258	0.00752866
STIL	-4.79	-4.69	1.02132	0.0304377	0.00671515
STK31	-7.86	-7.67	1.02477	0.0353027	0.00778826
STK32B	-7.52	-7.35	1.02313	0.0329884	0.00727778
STMN3	2.86	2.92	0.979452	-0.0299532	0.00660827
STRADA	-4.45	-4.52	0.984513	-0.0225174	0.00496795
STS	-7.78	-7.55	1.03046	0.0432935	0.00955066
STUB1	2.94	2.88	1.02083	0.0297473	0.00656286
STXBP4	-4.61	-4.47	1.03132	0.0444919	0.00981495
SUCLG1	6.285	6.27	1.00239	0.0034473	0.000760597
SUCLG2	3.30333	3.27333	1.00916	0.013162	0.00290397
SULT1D1	5.35	5.49	0.974499	-0.0372673	0.00822157
SULT4A1	-7.55	-7.32	1.03142	0.044633	0.00984606
SULT6B1	-7.84	-7.65	1.02484	0.0353939	0.00780837
SUSD5	-7.75	-7.52	1.03059	0.0434636	0.00958818
SV2A	-7.47	-7.24	1.03177	0.0451185	0.00995314
SV2B	-7.57	-7.35	1.02993	0.042549	0.00938647
SV2C	-7.23	-7.17	1.00837	0.0120225	0.00265257
SVEP1	-1.87	-1.83	1.02186	0.0311946	0.00688211
SVIP	-2.2	-2.15667	1.02009	0.0287003	0.00633189
SYNC	-7.37	-7.16	1.02933	0.041705	0.00920033
SYP	-7.72	-7.54	1.02387	0.0340363	0.00750893
SYT14	-7.79	-7.56	1.03042	0.0432371	0.00953821
SYT9	-7.68	-7.45	1.03087	0.0438659	0.00967689
SYTL5	-6.63	-6.48	1.02315	0.0330151	0.00728366
T	-6.795	-6.73	1.00966	0.013867	0.00305952
TAF10	3.47	3.54	0.980226	-0.0288137	0.0063569
TAF7L	-7.5	-7.27	1.03164	0.0449352	0.00991271
TANC2	-5.32	-5.24	1.01527	0.0218594	0.00482278
TARSL2	-4.63	-4.57	1.01313	0.018818	0.00415181
TAT	-7.8	-7.6	1.02632	0.0374747	0.00826732
TBC1D15	-1.505	-1.535	0.980456	-0.0284752	0.00628223
TBC1D20	-3.77	-3.7	1.01892	0.0270393	0.00596547
TBC1D21	-7.36	-7.23	1.01798	0.0257101	0.00567227
TBCCD1	-3.09	-3.1	0.996774	-0.00466138	0.00102846
TBCEL	-2.73	-2.78	0.982014	-0.0261839	0.00577679
TBPL2	-7.8	-7.58	1.02902	0.0412763	0.00910577
TBR1	-7.69	-7.47	1.02945	0.0418754	0.0092379
TBX20	-7.54	-7.31	1.03146	0.0446931	0.00985932
TBX4	-7.77	-7.6	1.02237	0.0319152	0.00704105
TCEAL3	-5.56	-5.68	0.978873	-0.030806	0.00679639
TCEB2	5.8	5.78	1.00346	0.00498341	0.00109951
TCF25	1.8925	1.905	0.993438	-0.0094977	0.00209552
TCHH	-7.63	-7.43	1.02692	0.0383208	0.00845395
TCL1A	-7.76	-7.53	1.03054	0.0434068	0.00957564
TCL1B	-7.79	-7.56	1.03042	0.0432371	0.00953821
TDO2	-4.11	-4.1	1.00244	0.00351448	0.00077542
TDRKH	-7.74	-7.55	1.02517	0.0358569	0.0079105
TEAD1	-3.78	-3.88	0.974227	-0.0376704	0.00831049
TEX101	-7.62	-7.45	1.02282	0.0325506	0.00718121
TEX11	-7.55	-7.4	1.02027	0.0289514	0.00638728
TEX261	2.395	2.35	1.01915	0.0273649	0.00603731
TFAP2B	-7.8	-7.63	1.02228	0.0317911	0.00701367
TFAP2C	-7.59	-7.43	1.02153	0.0307377	0.00678131
TFAP4	-4.36	-4.47	0.975391	-0.0359467	0.0079303
TFPI2	-7.78	-7.59	1.02503	0.0356703	0.00786933
TG	-6.63	-6.78	0.977876	-0.0322764	0.00712073
THBD	-2.4	-2.37	1.01266	0.0181473	0.00400385
THBS2	-7.83	-7.64	1.02487	0.0354397	0.00781847
THNSL1	-3.8525	-3.7925	1.01582	0.0226458	0.00499626
THOC1	-1.18	-1.19	0.991597	-0.0121747	0.00268614
THRAP3	-1.22	-1.245	0.97992	-0.0292646	0.00645637
THUMPD1	-5.73	-5.56	1.03058	0.0434503	0.00958522
TIAL1	1.845	1.84	1.00272	0.00391505	0.000863798
TIMELESS	-5.69	-5.59	1.01789	0.0255804	0.00564364
TIMP3	-2.57667	-2.61333	0.985969	-0.0203852	0.00449756
TLCD2	-7.61	-7.44	1.02285	0.0325938	0.00719075
TLK2	-3.39	-3.30667	1.0252	0.0359077	0.00792169
TLX1	-4.62	-4.68	0.987179	-0.0186157	0.00410717
TMC1	-7.72	-7.54	1.02387	0.0340363	0.00750893
TMED10	4.045	4.035	1.00248	0.00357103	0.000787895
TMED11	-7.83	-7.63	1.02621	0.0373293	0.00823524
TMEFF1	-3.8	-3.77	1.00796	0.0114349	0.00252292
TMEM11	1.75	1.71	1.02339	0.0333586	0.00735944
TMEM110	-3.73	-3.8	0.981579	-0.0268238	0.00591794
TMEM132B	-7.7	-7.52	1.02394	0.0341258	0.00752866
TMEM144	-0.93	-0.935	0.994652	-0.00773565	0.00170675
TMEM149	-1.3	-1.29	1.00775	0.0111406	0.00245798
TMEM174	-6.23	-6.14	1.01466	0.0209935	0.00463175
TMEM179B	3.47	3.5	0.991429	-0.0124193	0.0027401
TMEM190	-3.73	-3.755	0.993342	-0.00963728	0.00212631
TMEM194A	-7.44	-7.21	1.0319	0.0453034	0.00999389
TMEM20	-0.39	-0.38	1.02632	0.0374747	0.00826732
TMEM208	2.24	2.3	0.973913	-0.0381351	0.00841299
TMEM211	-7.86	-7.68	1.02344	0.033423	0.00737364
TMEM212	-7.76	-7.52	1.03191	0.045324	0.00999844
TMEM225	-7.58	-7.41	1.02294	0.0327243	0.00721953
TMEM25	-7.78	-7.55	1.03046	0.0432935	0.00955066
TMEM27	-3.735	-3.7175	1.00471	0.0067755	0.00149491
TMEM50A	3.06	3.08	0.993506	-0.0093987	0.00207367
TMEM59L	-6.1	-6	1.01667	0.0238467	0.0052612
TMEM63C	-7.47	-7.32	1.02049	0.0292646	0.00645637
TMEM8C	-2.67	-2.66	1.00376	0.0054135	0.00119441
TMIE	-7.81	-7.63	1.02359	0.0336395	0.0074214
TMPRSS11A	-7.8	-7.62	1.02362	0.0336831	0.00743102
TMPRSS11D	-7.88	-7.69	1.02471	0.035212	0.00776826
TMPRSS11F	-7.54	-7.31	1.03146	0.0446931	0.00985932
TMPRSS4	-2.89	-2.91	0.993127	-0.00994966	0.00219523
TMTC4	-0.77	-0.79	0.974684	-0.0369942	0.00816134
TNFRSF11A	-7.8	-7.58	1.02902	0.0412763	0.00910577
TNFRSF14	6.46	6.35	1.01732	0.0247776	0.00546655
TNFSF14	-4.45	-4.52	0.984513	-0.0225174	0.00496795
TNFSF18	-7.8	-7.57	1.03038	0.0431808	0.0095258
TNFSF4	-7.81	-7.63	1.02359	0.0336395	0.0074214
TNMD	-7.76	-7.52	1.03191	0.045324	0.00999844
TNNT1	-5.17	-5.31	0.973635	-0.0385476	0.00850396
TNNT3	-7.84	-7.64	1.02618	0.037281	0.0082246
TNPO2	-4.39	-4.38	1.00228	0.00329007	0.000725906
TNS3	-5.44	-5.29	1.02836	0.0403389	0.00889904
TP63	-7.8	-7.62	1.02362	0.0336831	0.00743102
TP73	-3.245	-3.22	1.00776	0.0111578	0.00246178
TPC3	-5.93	-5.775	1.02684	0.0382112	0.00842976
TPD52L1	-7.76	-7.58	1.02375	0.0338588	0.00746977
TPH2	-7.47	-7.24	1.03177	0.0451185	0.00995314
TPI1	4.87	4.77	1.02096	0.0299325	0.0066037
TPM4	2.745	2.76	0.994565	-0.00786212	0.00173465
TRAPPC5	3.8	3.71	1.02426	0.0345802	0.0076289
TRIM10	-2.22	-2.2	1.00909	0.0130562	0.00288061
TRIM17	-0.91	-0.89	1.02247	0.0320612	0.00707326
TRIM37	-3.995	-4.115	0.970838	-0.0426969	0.00941909
TRIM38	-7.88	-7.68	1.02604	0.0370893	0.00818232
TRIM41	-3.29	-3.32	0.990964	-0.0130957	0.00288933
TRIM44	-6.34	-6.48	0.978395	-0.031511	0.00695189
TRIM66	-7.86	-7.65	1.02745	0.0390696	0.00861908
TRIM71	-7.32	-7.11	1.02954	0.0419941	0.00926408
TRMU	-4.03	-4.13	0.975787	-0.0353619	0.00780132
TROVE2	-2.02	-2.07	0.975845	-0.0352755	0.00778225
TRPM3	-6.53667	-6.43667	1.01554	0.0222414	0.00490704
TRPV3	-7.79	-7.56	1.03042	0.0432371	0.00953821
TSEN15	-4.68	-4.59	1.01961	0.0280144	0.00618058
TSHB	-4.515	-4.385	1.02965	0.0421491	0.00929828
TSNARE1	-4.93	-4.84	1.0186	0.0265806	0.00586429
TSNAX	-1.48	-1.52	0.973684	-0.0384741	0.00848776
TSNAXIP1	-3.53	-3.56	0.991573	-0.0122091	0.00269372
TSPAN14	-3.89	-3.84	1.01302	0.0186638	0.00411779
TSPAN3	3.74	3.825	0.977778	-0.0324215	0.00715273
TSPAN7	2.11	2.12	0.995283	-0.00682127	0.00150501
TSSC1	4.58	4.49	1.02004	0.0286322	0.00631686
TTC21B	-3.66	-3.58	1.02235	0.0318841	0.00703419
TTC25	-4.43	-4.51	0.982262	-0.0258207	0.00569667
TTN	-7.82333	-7.6	1.02939	0.041784	0.00921775
TTYH1	-3.48333	-3.57667	0.973905	-0.0381471	0.00841564
TUBA8	-3.3	-3.34	0.988024	-0.0173821	0.00383501
TUBB2C	5.235	5.305	0.986805	-0.0191632	0.00422796
TUBB6	1.8	1.75	1.02857	0.040642	0.00896588
TUBE1	-3.85	-3.75	1.02667	0.0379678	0.00837609
TUBGCP3	-2.57	-2.63	0.977186	-0.0332944	0.00734529
TXLNG	1.06	1.04	1.01923	0.0274807	0.00606286
TXNDC16	-4.17333	-4.25667	0.980423	-0.028524	0.00629299
TXNDC2	-7.41	-7.19	1.0306	0.0434818	0.00959217
TXNDC3	-7.58	-7.37	1.02849	0.0405332	0.0089419
TXNRD1	2.9625	2.895	1.02332	0.0332518	0.00733588
TYRP1	-7.745	-7.57	1.02312	0.0329719	0.00727415
UBE2N	0.515	0.51	1.0098	0.0140752	0.00310544
UBE2O	-5.06	-5.14	0.984436	-0.022631	0.00499299
UBE2QL1	-7.68	-7.45	1.03087	0.0438659	0.00967689
UBE3C	-1.10667	-1.12667	0.982249	-0.02584	0.00570092
UBXN6	3.8	3.89	0.976864	-0.0337707	0.00745035
UCN3	-4.66	-4.75	0.981053	-0.0275976	0.00608863
UGDH	2.05	2	1.025	0.0356239	0.0078591
UHRF1BP1	-2.01	-2	1.005	0.0071955	0.00158758
UNC45A	2.035	2.015	1.00993	0.014249	0.00314378
UNC45B	-7.675	-7.495	1.02402	0.0342383	0.00755347
UNCX	-7.79	-7.6	1.025	0.0356239	0.0078591
UNK	2.025	2.07	0.978261	-0.0317089	0.00699554
UOX	-7.68	-7.5	1.024	0.0342157	0.0075485
USE1	3.86	3.76	1.0266	0.0378682	0.00835411
USP11	-2.38	-2.33333	1.02	0.0285692	0.00630296
USP26	-7.5	-7.34	1.0218	0.0311105	0.00686356
USP4	2.62667	2.70667	0.970443	-0.0432841	0.00954858
USP42	-2.735	-2.695	1.01484	0.0212556	0.00468956
USP44	-6.112	-6.266	0.975423	-0.0359002	0.00792005
USP50	-7.78	-7.585	1.02571	0.036621	0.00807902
USP53	-2.03333	-1.97667	1.02867	0.0407771	0.00899569
USP7	2.57	2.61667	0.982166	-0.0259618	0.00572779
UTS2D	-6.68	-6.89	0.969521	-0.0446559	0.0098511
VAT1L	-4.76	-4.91	0.96945	-0.0447615	0.00987439
VEPH1	-7.74	-7.56	1.02381	0.0339473	0.0074893
VGLL1	-7.87	-7.69	1.02341	0.03338	0.00736417
VIP	-7.67	-7.49	1.02403	0.0342609	0.00755845
VIT	-5.65	-5.68	0.994718	-0.00764006	0.00168566
VPS16	2.77	2.78	0.996403	-0.00519891	0.00114706
VPS24	5.53	5.44	1.01654	0.0236728	0.00522283
VPS28	1.75	1.74	1.00575	0.00826762	0.00182412
VSIG1	-7.87	-7.68	1.02474	0.0352573	0.00777825
VSIG10	0.755	0.77	0.980519	-0.0283818	0.00626163
VSNL1	-6.82	-6.8	1.00294	0.00423699	0.00093483
VSTM2L	-7.51	-7.28	1.03159	0.0448745	0.00989931
VSX1	-7.4	-7.26	1.01928	0.0275557	0.0060794
VWC2L	-7.35	-7.13	1.03086	0.0438422	0.00967166
WAS	-5.49	-5.63	0.975133	-0.0363288	0.00801457
WDR16	-7.81	-7.63	1.02359	0.0336395	0.0074214
WDR37	-4.92	-4.8	1.025	0.0356239	0.0078591
WDR47	-2.51	-2.505	1.002	0.00287676	0.000634715
WDR52	-7.79	-7.56	1.03042	0.0432371	0.00953821
WDR63	-5.48	-5.425	1.01014	0.0145528	0.0032108
WDR72	-7.76	-7.57	1.0251	0.0357634	0.00788986
WDR87	-7.81	-7.61	1.02628	0.0374261	0.0082566
WDR88	-7.63	-7.45	1.02416	0.0344426	0.00759855
WFDC5	-7.125	-7.265	0.98073	-0.0280728	0.00619346
WFDC8	-7.79	-7.59	1.02635	0.0375234	0.00827807
WNT1	-3.19	-3.16	1.00949	0.0136319	0.00300763
WNT16	-7.75	-7.56	1.02513	0.0358101	0.00790017
WNT5A	6.18	6.32	0.977848	-0.0323177	0.00712984
WNT6	-7.3	-7.18	1.01671	0.0239126	0.00527573
WNT7A	-7.85	-7.65	1.02614	0.0372329	0.00821399
WSCD1	-3.04	-2.95	1.03051	0.0433564	0.00956452
XKR6	-7.69	-7.5	1.02533	0.036093	0.00796257
XKR8	-3.33	-3.31	1.00604	0.00869096	0.00191752
XRCC2	-4.05	-4.02	1.00746	0.0107264	0.00236661
XRCC4	-3.94	-3.99	0.987469	-0.0181931	0.00401394
XRCC6	3.59	3.49	1.02865	0.0407568	0.00899121
YIPF1	2.47	2.54667	0.969895	-0.0440991	0.00972832
YPEL4	-7.8	-7.63	1.02228	0.0317911	0.00701367
YSK4	-6.68	-6.82	0.979472	-0.0299236	0.00660175
YWHAB	4.9	4.87	1.00616	0.00885998	0.00195481
ZBTB24	-1.7	-1.68	1.0119	0.0170735	0.00376694
ZBTB48	-0.79	-0.81	0.975309	-0.0360693	0.00795733
ZC3H14	-3.245	-3.165	1.02528	0.036013	0.00794492
ZC4H2	-2.46	-2.4	1.025	0.0356239	0.0078591
ZCCHC10	-7.78	-7.56	1.0291	0.0413839	0.00912951
ZCCHC8	-5.12	-5.24	0.977099	-0.033423	0.00737364
ZCWPW1	-6.75	-6.7	1.00746	0.0107264	0.00236661
ZDHHC15	-5.73	-5.77	0.993068	-0.0100362	0.00221432
ZDHHC19	-7.83	-7.64	1.02487	0.0354397	0.00781847
ZDHHC21	-1.39	-1.36	1.02206	0.0314782	0.00694467
ZDHHC5	3.68	3.76	0.978723	-0.0310269	0.00684511
ZDHHC6	-0.8275	-0.8425	0.982196	-0.0259174	0.00571799
ZFAT	-6.4	-6.29	1.01749	0.0250119	0.00551824
ZG16	4.23	4.285	0.987165	-0.0186375	0.00411199
ZIC5	-7.74	-7.55	1.02517	0.0358569	0.0079105
ZIM2	-7.75	-7.56	1.02513	0.0358101	0.00790017
ZMAT4	-4.61	-4.57	1.00875	0.0125726	0.00277392
ZMYM3	-1.55	-1.57	0.987261	-0.0184963	0.00408084
ZNF142	-0.565	-0.575	0.982609	-0.0253111	0.00558424
ZNF165	-7.66	-7.48	1.02406	0.0343061	0.00756844
ZNF181	-5.24667	-5.29	0.991808	-0.0118666	0.00261816
ZNF184	-2.105	-2.055	1.02433	0.0346818	0.00765131
ZNF236	-2.09	-2.115	0.98818	-0.0171547	0.00378485
ZNF276	-1.13	-1.16	0.974138	-0.037802	0.00833952
ZNF277	-2.75	-2.69	1.0223	0.0318254	0.00702126
ZNF281	2.01	2.05	0.980488	-0.0284284	0.00627191
ZNF287	-7.81	-7.61	1.02628	0.0374261	0.0082566
ZNF300	-3.1225	-3.1325	0.996808	-0.00461294	0.00101778
ZNF335	-1.22	-1.2	1.01667	0.0238467	0.0052612
ZNF385C	-7.77	-7.54	1.0305	0.0433501	0.00956313
ZNF483	-7.72	-7.54	1.02387	0.0340363	0.00750893
ZNF550	-7.19	-7.24	0.993094	-0.00999793	0.00220588
ZNF75D	-1.98	-2	0.99	-0.0144996	0.00319907
ZNF774	-7.27	-7.16	1.01536	0.0219958	0.00485286
ZNF81	-4.77	-4.63	1.03024	0.0429771	0.00948087
ZSCAN29	-6.2	-6.135	1.01059	0.0152049	0.00335467
ZSCAN4	-7.79	-7.58	1.0277	0.0394255	0.00869758

## Sheet: Sheet2
Table S1.Differential Genes of Dog Recurrent Infection with Hydatidosis
Symbol	S	N	FC	logFC	p.value
AADACL2	-7.52	-7.35	1.02313	0.0329884	0.00727778
AADACL3	-7.82	-7.63	1.0249	0.0354855	0.00782859
AADACL4	-7.73	-7.56	1.02249	0.0320822	0.00707789
ABAT	3.92	3.81	1.02887	0.0410627	0.00905866
ABCA9	-6.275	-6.2	1.0121	0.0173472	0.00382733
ABCC12	-7.92	-7.69	1.02991	0.0425168	0.00937937
ABCD2	-7.81	-7.61	1.02628	0.0374261	0.0082566
ABCF3	-1.59	-1.615	0.98452	-0.0225074	0.00496573
ABCG4	-7.9	-7.68	1.02865	0.0407463	0.0089889
ABHD14B	2.7	2.68	1.00746	0.0107264	0.00236661
ACADM	5.45	5.39	1.01113	0.015971	0.00352369
ACCN5	-7.88	-7.67	1.02738	0.0389691	0.00859691
ACMSD	-7.835	-7.63	1.02687	0.0382502	0.00843837
ACOT12	-7.83	-7.6	1.03026	0.0430129	0.00948877
ACOT7	2.32	2.34	0.991453	-0.0123837	0.00273226
ACR	-7.7	-7.52	1.02394	0.0341258	0.00752866
ACSL6	-7.825	-7.61	1.02825	0.0401943	0.00886715
ACSM2A	-6.5475	-6.475	1.0112	0.016064	0.00354421
ACTL6B	-7.65	-7.49	1.02136	0.030494	0.00672757
ACTL7B	-6.26	-6.3	0.993651	-0.00918917	0.00202744
ACTL9	-6.07	-5.97	1.01675	0.0239656	0.00528742
ACTN2	-6.79833	-6.88	0.98813	-0.0172275	0.0038009
ACTR1A	5.12	5.06	1.01186	0.0170064	0.00375214
ADAM18	-7.68	-7.5	1.024	0.0342157	0.0075485
ADAM21	-7.76	-7.56	1.02646	0.0376704	0.00831049
ADAM32	-7.5	-7.315	1.02529	0.0360327	0.00794928
ADAMTS14	-5.12	-5.14	0.996109	-0.00562455	0.00124097
ADAMTS9	-6.9	-6.85	1.0073	0.0104924	0.00231497
ADAMTSL3	-7.73	-7.55	1.02384	0.0339918	0.0074991
ADCY10	-7.86	-7.64	1.0288	0.0409567	0.00903529
ADRBK2	-5.22	-5.19	1.00578	0.00831527	0.00183463
AFG3L2	-1.54333	-1.57333	0.980932	-0.0277747	0.0061277
AGAP2	-7.46	-7.28	1.02473	0.0352372	0.0077738
AGPAT6	-1.07667	-1.09	0.987768	-0.0177565	0.00391761
AGTR1	-7.24	-7.26	0.997245	-0.00397985	0.000878096
AHI1	-4.925	-4.825	1.02073	0.0295948	0.0065292
AIFM3	-7.71	-7.52	1.02527	0.0359982	0.00794166
AKAP4	-5.14	-5.18	0.992278	-0.0111837	0.00246751
ALAD	2.75	2.77	0.99278	-0.0104544	0.00230658
ALCAM	-1.55	-1.51	1.02649	0.0377197	0.00832135
ALG10	-3.605	-3.655	0.98632	-0.0198721	0.00438436
ALLC	-7.53	-7.34	1.02589	0.0368698	0.00813391
ALPK3	-7.82	-7.59	1.0303	0.0430687	0.00950108
ALPL	-5.0825	-5.18	0.981178	-0.0274138	0.00604809
AMIGO1	-7.53	-7.33	1.02729	0.0388367	0.00856772
AMTN	-7.68	-7.53	1.01992	0.0284564	0.0062781
AMZ1	-7.87	-7.66	1.02742	0.0390192	0.00860798
AMZ2	1.63	1.68	0.970238	-0.0435893	0.00961588
ANKRD29	-2.7	-2.62	1.03053	0.0433926	0.00957251
ANKRD33B	-7.65	-7.5	1.02	0.0285692	0.00630296
ANKRD60	-7.81	-7.58	1.03034	0.0431247	0.00951343
ANO4	-7.55	-7.35	1.02721	0.0387324	0.00854472
ANXA11	5.81	5.72	1.01573	0.022523	0.00496918
ANXA2	6.17	6.21	0.993559	-0.00932278	0.00205692
AOH2	-7.69	-7.54	1.01989	0.0284191	0.00626985
AP2A2	2.628	2.666	0.985746	-0.0207115	0.00456954
AP2S1	3.085	3.11	0.991961	-0.0116441	0.00256907
AP3M2	-7.92	-7.68	1.03125	0.0443941	0.00979338
AP4B1	2.37	2.315	1.02376	0.0338749	0.00747331
APITD1	-7.4	-7.2	1.02778	0.0395284	0.00872027
APOBEC2	-7.42	-7.22	1.0277	0.0394203	0.00869645
APOLD1	-7.81	-7.62	1.02493	0.0355316	0.00783873
AQP4	-7.65	-7.5	1.02	0.0285692	0.00630296
AQP6	-7.88	-7.67	1.02738	0.0389691	0.00859691
ARFIP1	-2.74	-2.8	0.978571	-0.0312509	0.00689453
ARHGEF15	-4.255	-4.39	0.969248	-0.0450618	0.00994062
ARHGEF4	-7.66	-7.48	1.02406	0.0343061	0.00756844
ARL13B	-3.12	-3.11	1.00322	0.00463145	0.00102186
ARMC3	-7.76667	-7.55333	1.02824	0.0401821	0.00886445
ARMC6	-2.73	-2.67	1.02247	0.0320612	0.00707326
ARMC7	-4.685	-4.56	1.02741	0.0390152	0.0086071
ARPC3	5.69	5.72	0.994755	-0.00758649	0.00167384
ARSH	-5.99	-5.91	1.01354	0.0193979	0.00427973
ART4	-6.37	-6.41	0.99376	-0.00903098	0.00199254
ARX	-6.015	-5.905	1.01863	0.0266277	0.00587468
ASB10	-4.7	-4.6	1.02174	0.0310269	0.00684511
ASB13	-3.71	-3.82	0.971204	-0.0421535	0.00929923
ASB14	-7.82	-7.63	1.0249	0.0354855	0.00782859
ASGR1	-7.64	-7.45	1.0255	0.0363322	0.00801533
ASIP	-7.79	-7.6	1.025	0.0356239	0.0078591
ASZ1	-7.83	-7.63	1.02621	0.0373293	0.00823524
ATF4	4.68333	4.64667	1.00789	0.0113396	0.00250189
ATG10	-5.04	-4.89	1.03067	0.0435893	0.00961588
ATP12A	-7.65	-7.47	1.0241	0.0343515	0.00757845
ATP13A4	-7.39	-7.17	1.03068	0.0436012	0.00961852
ATP1B2	-6.51	-6.63	0.9819	-0.0263513	0.00581372
ATP1B4	-5.6	-5.62	0.996441	-0.0051433	0.00113479
ATP4B	-7.85	-7.64	1.02749	0.03912	0.00863021
ATP5C1	3.342	3.332	1.003	0.00432333	0.00095388
ATP5SL	-2.595	-2.575	1.00777	0.0111621	0.00246273
ATP6V0A2	-2.34	-2.27	1.03084	0.0438162	0.00966593
ATP6V0C	4.37667	4.48667	0.975483	-0.0358115	0.00790048
ATP6V0D2	-7.8	-7.61	1.02497	0.0355777	0.00784891
ATP6V1C2	-4.64667	-4.51667	1.02878	0.0409377	0.0090311
AWAT1	-6.4	-6.31	1.01426	0.0204319	0.00450785
B3GALT1	-7.81	-7.58	1.03034	0.0431247	0.00951343
B3GNT9	-5.09	-5.12	0.994141	-0.00847815	0.00187057
BAALC	-7.39	-7.17	1.03068	0.0436012	0.00961852
BAAT	2.21	2.28	0.969298	-0.0449875	0.00992423
BAI2	-3.5	-3.57	0.980392	-0.0285692	0.00630296
BBS9	-3.49	-3.55	0.983099	-0.024592	0.00542561
BCL2L13	1.29	1.32	0.977273	-0.0331669	0.00731715
BCL6B	-6.28	-6.21	1.01127	0.0161713	0.00356789
BCL7A	-5.56	-5.65	0.984071	-0.023166	0.00511102
BCL9	-2.76	-2.83	0.975265	-0.0361338	0.00797157
BCOR	-3.74	-3.68	1.0163	0.0233325	0.00514776
BEND4	-5.91	-5.99	0.986644	-0.0193979	0.00427973
BEND6	-7.83	-7.64	1.02487	0.0354397	0.00781847
BEST1	-7.57	-7.46	1.01475	0.0211177	0.00465914
BET3L	-7.56	-7.37	1.02578	0.0367216	0.00810122
BIN3	-3.28	-3.25	1.00923	0.0132561	0.00292473
BMP15	-7.84	-7.64	1.02618	0.037281	0.0082246
BPIL3	-7.78	-7.61	1.02234	0.0318737	0.0070319
BRCA1	-5.06	-5.1	0.992157	-0.0113599	0.00250636
BRCA2	-1.5	-1.54	0.974026	-0.0379678	0.00837609
BRD1	-4.15	-4.28	0.969626	-0.0444995	0.00981661
BRI3	-2.765	-2.845	0.97188	-0.0411492	0.00907774
BRIP1	-4.55	-4.65	0.978495	-0.0313642	0.00691951
BTBD1	-1.18	-1.175	1.00426	0.0061261	0.00135163
C1QA	2.87	2.91	0.986254	-0.0199684	0.0044056
C1QL3	-7.525	-7.595	0.990783	-0.0133584	0.00294729
C1QTNF3	-7.73	-7.515	1.02861	0.0406953	0.00897764
C1QTNF4	-2.71	-2.74	0.989051	-0.015883	0.00350429
C23H3orf39	-2.04	-2.05	0.995122	-0.00705476	0.00155652
C8A	-7.68	-7.5	1.024	0.0342157	0.0075485
C9	-7.84	-7.6	1.03158	0.0448542	0.00989485
CA10	-6.5	-6.69	0.971599	-0.0415665	0.00916978
CA11	-1.355	-1.3325	1.01689	0.0241573	0.00532972
CABP4	-7.91	-7.68	1.02995	0.0425714	0.0093914
CACNA2D1	-3.44	-3.45	0.997101	-0.0041878	0.000923976
CACNA2D3	-6.99667	-7.05333	0.991966	-0.0116375	0.00256761
CACNA2D4	-7.73	-7.53	1.02656	0.0378185	0.00834316
CACNB2	-7.82	-7.63	1.0249	0.0354855	0.00782859
CACNB3	-1.3925	-1.3575	1.02578	0.0367251	0.008102
CACNG6	-7.62	-7.44	1.02419	0.0344884	0.00760864
CADM2	-7.69	-7.51	1.02397	0.0341707	0.00753857
CAFA-T2R3	-7.68	-7.51	1.02264	0.0322934	0.00712448
CAFA-T2R38	-7.75	-7.56	1.02513	0.0358101	0.00790017
CAFA-T2R43	-7.82	-7.58	1.03166	0.0449708	0.00992054
CAFA-T2R5	-7.6	-7.44	1.02151	0.0306968	0.0067723
CAFA-T2R67	-7.84	-7.65	1.02484	0.0353939	0.00780837
CALHM2	-2.63333	-2.69333	0.977723	-0.0325026	0.00717063
CALHM3	-6.14	-6.07	1.01153	0.0165421	0.0036497
CALM1	6.56	6.41	1.0234	0.0333715	0.00736228
CALM3	4.49	4.3775	1.0257	0.0366083	0.00807622
CALR3	-6.34	-6.35	0.998425	-0.00227375	0.00050167
CAMK1G	-7.87	-7.65	1.02876	0.0409039	0.00902364
CAMKV	-7.5	-7.29	1.02881	0.0409718	0.00903862
CAPN6	-7.76	-7.57	1.0251	0.0357634	0.00788986
CAPN7	-1.31667	-1.33333	0.9875	-0.0181473	0.00400384
CAPRIN2	-1.99	-1.94	1.02577	0.0367118	0.00809905
CAPZA3	-7.58	-7.41	1.02294	0.0327243	0.00721953
CARM1	-2.485	-2.435	1.02053	0.0293241	0.00646949
CASKIN1	-7.87	-7.66	1.02742	0.0390192	0.00860798
CASQ2	-7.83	-7.605	1.02959	0.0420641	0.00927951
CATSPER1	-7.56	-7.38	1.02439	0.0347654	0.00766975
CATSPER3	-7.58	-7.39	1.02571	0.0366235	0.00807958
CATSPERB	-7.77	-7.56	1.02778	0.0395284	0.00872027
CBLL1	1.76	1.77	0.99435	-0.00817393	0.00180345
CBX8	-1.17	-1.2	0.975	-0.0365259	0.00805805
CBY3	-7.55	-7.36	1.02582	0.0367709	0.00811209
CCBP2	-4.81	-4.68	1.02778	0.0395284	0.00872027
CCDC102B	-7.42	-7.62	0.973753	-0.0383718	0.00846519
CCDC110	-7.05333	-7.26667	0.970642	-0.0429885	0.00948339
CCDC114	-7.35	-7.48	0.98262	-0.025294	0.00558048
CCDC116	-4.55	-4.42	1.02941	0.0418202	0.00922573
CCDC137	-3.73	-3.69	1.01084	0.0155548	0.00343188
CCDC147	-7.645	-7.445	1.02686	0.0382447	0.00843714
CCDC19	-7.69	-7.53	1.02125	0.0303337	0.00669221
CCDC30	-5.7625	-5.665	1.01721	0.0246189	0.00543154
CCDC38	-7.88	-7.64	1.03141	0.044623	0.00984385
CCDC60	-7.78	-7.58	1.02639	0.0375723	0.00828885
CCDC62	-4.14333	-4.02333	1.02983	0.0424006	0.00935374
CCDC7	-7.91	-7.67	1.03129	0.0444511	0.00980595
CCDC70	-7.75	-7.55	1.02649	0.0377197	0.00832135
CCDC73	-7.55	-7.39	1.02165	0.0309023	0.00681762
CCDC77	-3.65	-3.67	0.99455	-0.0078836	0.00173939
CCDC79	-7.82	-7.63	1.0249	0.0354855	0.00782859
CCDC94	-7.23	-7.35	0.983673	-0.0237486	0.00523955
CCDC97	-4.965	-5.065	0.980257	-0.0287686	0.00634695
CCKAR	-5.65	-5.61	1.00713	0.0102501	0.00226152
CCL7	-7.8	-7.57	1.03038	0.0431808	0.0095258
CCNA1	-7.81	-7.62	1.02493	0.0355316	0.00783873
CCNG2	-2.77	-2.82	0.98227	-0.0258092	0.00569412
CCNI	2.82667	2.74	1.03163	0.0449259	0.00991064
CCR7	-7.55	-7.38	1.02304	0.0328558	0.00724854
CCT8L2	-7.7	-7.52	1.02394	0.0341258	0.00752866
CD164	1.825	1.785	1.02241	0.0319724	0.00705367
CD180	-2.61	-2.59	1.00772	0.0110977	0.00244853
CD1B	-4.69667	-4.83333	0.971724	-0.0413813	0.00912893
CD63	6.69	6.61	1.0121	0.0173559	0.00382925
CD70	-3.74	-3.71	1.00809	0.0116191	0.00256356
CDAN1	-3.42	-3.38	1.01183	0.0169731	0.00374478
CDC23	-5.09	-5.19667	0.979474	-0.0299209	0.00660114
CDC42	2.19667	2.24	0.980655	-0.0281828	0.00621773
CDH15	-7.42	-7.22	1.0277	0.0394203	0.00869645
CDH2	-5.11	-5.135	0.995131	-0.00704098	0.00155349
CDH24	-2.42	-2.38	1.01681	0.0240455	0.00530504
CDH8	-7.89	-7.65	1.03137	0.0445656	0.00983118
CDHR3	-7.79	-7.58	1.0277	0.0394255	0.00869758
CDKL1	-7.56	-7.39	1.023	0.0328119	0.00723884
CDKL3	-7.7	-7.5	1.02667	0.0379678	0.00837609
CDX4	-7.92	-7.69	1.02991	0.0425168	0.00937937
CELF3	-7.76	-7.6	1.02105	0.0300572	0.00663122
CELF5	-6.22	-6.3	0.987302	-0.0184372	0.0040678
CEP192	-3.19	-3.1	1.02903	0.0412882	0.00910841
CfOLF1	-7.745	-7.56	1.02447	0.034879	0.0076948
CGNL1	-7.38	-7.2	1.025	0.0356239	0.0078591
CHAD	-4.37	-4.36	1.00229	0.00330514	0.000729232
CHAT	-7.47	-7.27	1.02751	0.0391529	0.00863746
CHCHD10	8.24667	8.35	0.987625	-0.0179651	0.00396364
CHD6	-3.18	-3.2	0.99375	-0.00904514	0.00199567
CHDH	-4.46	-4.54	0.982379	-0.0256486	0.00565869
CHEK2	-2.3	-2.265	1.01545	0.0221228	0.00488089
CHI3L1	-7.45	-7.26	1.02617	0.0372709	0.00822237
CHIA	-7.48	-7.3	1.02466	0.0351418	0.00775277
CHMP4C	1.56	1.57	0.993631	-0.00921853	0.00203392
CHODL	-7.76	-7.53	1.03054	0.0434068	0.00957564
CHPT1	-0.47	-0.475	0.989474	-0.0152668	0.00336833
CHRM4	-2.4	-2.37	1.01266	0.0181473	0.00400385
CHRM5	-7.54	-7.33	1.02865	0.0407513	0.00899
CHRNA3	-7.89	-7.68	1.02734	0.038919	0.00858587
CHRNB3	-6.86	-6.97	0.984218	-0.0229501	0.00506339
CHRND	-7.9	-7.66	1.03133	0.0445083	0.00981855
CHST4	-4.08	-3.98	1.02513	0.0358007	0.0078981
CHST9	-7.47	-7.63	0.97903	-0.0305748	0.00674539
CILP	-7.83	-7.63	1.02621	0.0373293	0.00823524
CIRBP	-1.03	-1.04667	0.984076	-0.0231577	0.0051092
CLCF1	-7.53	-7.54	0.998674	-0.00191466	0.000422442
CLCN6	-5.44	-5.4	1.00741	0.0106472	0.00234914
CLDN17	-5.98	-5.94	1.00673	0.00968255	0.0021363
CLDN18	-7.68	-7.49	1.02537	0.0361406	0.00797307
CLDN7	5.67	5.73	0.989529	-0.0151864	0.0033506
CLEC3A	-7.77	-7.55	1.02914	0.041438	0.00914143
CLN8	-5.31	-5.4	0.983333	-0.0242475	0.00534962
CLOCK	-4.11	-4.07	1.00983	0.0141096	0.00311303
CLUL1	-7.79	-7.58	1.0277	0.0394255	0.00869758
CLVS2	-7.81	-7.58	1.03034	0.0431247	0.00951343
CMTM1	-7.7	-7.53	1.02258	0.0322086	0.00710577
CMYA5	-7.47333	-7.55	0.989845	-0.0147248	0.00324875
CNDP2	7.97	8.11	0.982737	-0.0251222	0.00554257
CNGA2	-7.93	-7.69	1.03121	0.0443373	0.00978084
CNGA3	-7.93	-7.69	1.03121	0.0443373	0.00978084
CNGA4	-7.82	-7.62	1.02625	0.0373776	0.00824591
CNGB3	-7.84	-7.64	1.02618	0.037281	0.0082246
CNKSR2	-7.61	-7.42	1.02561	0.0364773	0.00804733
CNTN1	-6.805	-6.88	0.989099	-0.0158134	0.00348893
CNTN3	-7.44	-7.59	0.980237	-0.0287973	0.00635328
CNTNAP5	-7.56	-7.35	1.02857	0.040642	0.00896588
COL10A1	-7.185	-7.32	0.981557	-0.0268555	0.00592494
COL25A1	-7.72	-7.53	1.02523	0.035951	0.00793125
COMMD6	-5.15	-5.24	0.982824	-0.0249944	0.00551437
COPB2	1.47	1.455	1.01031	0.014797	0.00326469
cOR10Q3	-7.41	-7.2	1.02917	0.0414766	0.00914996
cOR11J4	-7.72	-7.69	1.0039	0.00561725	0.00123936
cOR1AF1	-7.85	-7.61	1.03154	0.0447962	0.00988205
cOR51C4	-7.9	-7.67	1.02999	0.0426261	0.00940346
cOR51H3	-7.89	-7.68	1.02734	0.038919	0.00858587
cOR51H5	-7.71	-7.52	1.02527	0.0359982	0.00794166
cOR51K1P	-7.73	-7.54	1.0252	0.0359039	0.00792086
cOR51P3	-7.73	-7.55	1.02384	0.0339918	0.0074991
cOR51R2	-4.89	-5.03	0.972167	-0.0407239	0.00898396
cOR52A17	-7.71	-7.52	1.02527	0.0359982	0.00794166
cOR52AB4	-7.82	-7.59	1.0303	0.0430687	0.00950108
cOR52E9	-7.8	-7.59	1.02767	0.0393742	0.00868628
cOR52H8	-7.54	-7.36	1.02446	0.0348588	0.00769033
cOR52M5	-7.61	-7.57	1.00528	0.00760315	0.00167752
cOR52P2P	-7.87	-7.66	1.02742	0.0390192	0.00860798
cOR52Z4	-7.55	-7.37	1.02442	0.034812	0.00768003
cOR56A20	-4.38	-4.42	0.99095	-0.0131155	0.00289371
cOR56B6	-7.94	-7.7	1.03117	0.0442806	0.00976833
cOR5A3	-4.05	-3.93	1.03053	0.0433926	0.00957251
cOR5AN3	-5.9	-6.065	0.972795	-0.0397927	0.00877857
cOR5M13P	-7.86	-7.62	1.0315	0.0447383	0.00986928
cOR6C63	-7.83	-7.64	1.02487	0.0354397	0.00781847
cOR6M4	-7.79	-7.56	1.03042	0.0432371	0.00953821
cOR6M5	-7.84	-7.61	1.03022	0.0429572	0.00947649
cOR9A7	-7.77	-7.56	1.02778	0.0395284	0.00872027
cOR9K3	-7.67	-7.505	1.02199	0.0313745	0.00692179
cOR9R4	-7.73	-7.57	1.02114	0.0301751	0.00665722
CPA1	-7.64	-7.45	1.0255	0.0363322	0.00801533
CPA4	-5.78	-5.62	1.02847	0.0404994	0.00893443
CPA6	-7.6	-7.43	1.02288	0.0326372	0.00720032
CPB1	-6.575	-6.73	0.976969	-0.0336156	0.00741613
CPLX2	-6.9	-6.71	1.02832	0.0402836	0.00888684
CPNE4	-7.58	-7.4	1.02432	0.0346726	0.00764927
CPS1	-2.93	-2.99	0.979933	-0.0292448	0.00645201
CPT2	3.14	3.05	1.02951	0.0419553	0.00925553
CPXM2	-3.44	-3.3775	1.0185	0.0264528	0.0058361
CR2	-7.76	-7.56	1.02646	0.0376704	0.00831049
CREB3L1	-7.77	-7.54	1.0305	0.0433501	0.00956313
CRHBP	-7.77	-7.58	1.02507	0.0357167	0.00787958
CRISP2	-5.655	-5.57	1.01526	0.0218497	0.00482064
CROT	-4	-4.02	0.995025	-0.0071955	0.00158758
CRP	-6.87	-6.78	1.01327	0.0190248	0.00419743
CRX	-7.24	-7.15	1.01259	0.0180465	0.00398159
CSMD3	-7.63	-7.46	1.02279	0.0325074	0.00717169
CSN2	-7.45	-7.28	1.02335	0.033302	0.00734695
CSNK2A2	1.28	1.32	0.969697	-0.0443941	0.00979338
CST11	-7.45	-7.29	1.02195	0.0313216	0.00691012
CST9L	-5	-5.03	0.994036	-0.0086303	0.00190414
CSTA	-7.09	-7.2	0.984722	-0.0222113	0.00490041
CTCFL	-7.82	-7.62	1.02625	0.0373776	0.00824591
CTNNA1	-7.78	-7.61	1.02234	0.0318737	0.0070319
CTRB1	-5.038	-4.934	1.02108	0.0300934	0.0066392
CTRC	-4.68667	-4.80333	0.975711	-0.0354737	0.00782598
CWH43	-7.85	-7.65	1.02614	0.0372329	0.00821399
CYB5R3	-2.7	-2.63	1.02662	0.0378966	0.00836038
CYP2D15	-4.52	-4.55	0.993407	-0.00954377	0.00210568
CYP2E1	-7.745	-7.545	1.02651	0.0377443	0.00832679
CYP3A26	-7.57	-7.39	1.02436	0.0347189	0.00765949
CYP4A38	-7.78	-7.59	1.02503	0.0356703	0.00786933
CYTL1	-7.8	-7.56	1.03175	0.0450879	0.00994637
DAG1	-2.21	-2.23	0.991031	-0.0129973	0.00286764
DBNDD1	-5.89	-5.71	1.03152	0.0447769	0.00987779
DBX2	-7.69	-7.5	1.02533	0.036093	0.00796257
DCAF8L2	-7.79	-7.59	1.02635	0.0375234	0.00827807
DCBLD1	-1.81	-1.85	0.978378	-0.0315356	0.00695732
DCDC2	-7.7	-7.52	1.02394	0.0341258	0.00752866
DCDC5	-7.56	-7.37	1.02578	0.0367216	0.00810122
DCLK1	-7.6	-7.39	1.02842	0.0404251	0.00891804
DCP2	-1.87	-1.86	1.00538	0.00773565	0.00170675
DCST2	-7.75	-7.56	1.02513	0.0358101	0.00790017
DCT	-7.67	-7.52	1.01995	0.0284939	0.00628636
DDB1	-2.07	-2.11	0.981043	-0.0276122	0.00609187
DDI1	-7.82	-7.63	1.0249	0.0354855	0.00782859
DDT	3.93	4.03	0.975186	-0.0362505	0.00799732
DDX11	-1.93	-1.935	0.997416	-0.00373272	0.00082357
DDX25	-5.20667	-5.09333	1.02225	0.0317499	0.0070046
DDX4	-5.41	-5.3	1.02075	0.0296362	0.00653835
DDX43	-7.52	-7.32	1.02732	0.038889	0.00857926
DEFB1	-7.43	-7.23	1.02766	0.0393666	0.00868459
DEFB105A	-7.89	-7.67	1.02868	0.0407987	0.00900045
DEFB127	-6.345	-6.165	1.0292	0.0415193	0.00915936
DFNB59	-6.7	-6.85	0.978102	-0.0319429	0.00704716
DGKI	-7.82	-7.63	1.0249	0.0354855	0.00782859
DGKK	-7.86	-7.66	1.02611	0.0371849	0.00820341
DKK2	-7.69	-7.53	1.02125	0.0303337	0.00669221
DLGAP2	-7.32	-7.4	0.989189	-0.0156816	0.00345986
DLX5	-6.18	-6	1.03	0.0426443	0.00940749
DMAP1	5.02	4.88	1.02869	0.0408062	0.0090021
DMRT1	-7.69	-7.51	1.02397	0.0341707	0.00753857
DNAH10	-5.45	-5.34	1.0206	0.0294165	0.00648987
DNAH6	-7.7	-7.51	1.0253	0.0360455	0.0079521
DNAH7	-7.91	-7.67	1.03129	0.0444511	0.00980595
DNAH8	-5.6	-5.625	0.995556	-0.00642627	0.00141786
DNAI1	-2.91	-2.89	1.00692	0.00994966	0.00219523
DNAJC12	-4.74	-4.69	1.01066	0.0152991	0.00337547
DNAJC3	2.845	2.905	0.979346	-0.0301095	0.00664275
DNAJC5B	-7.77	-7.59	1.02372	0.0338147	0.00746005
DNAJC6	-7.43	-7.24	1.02624	0.0373725	0.00824478
DNTT	-7.63	-7.45	1.02416	0.0344426	0.00759855
DNTTIP1	3.06667	3.02667	1.01322	0.0189416	0.00417906
DOCK7	-3.55	-3.6	0.986111	-0.0201779	0.00445181
DOK6	-5.2	-5.13	1.01365	0.0195528	0.00431391
DRAM2	2.49333	2.45	1.01769	0.025294	0.00558048
DRD5	-7.83	-7.62	1.02756	0.0392213	0.00865255
DSEL	-7.5	-7.33	1.02319	0.0330774	0.00729741
DSG4	-7.66	-7.48	1.02406	0.0343061	0.00756844
DUOXA2	-7.62	-7.46	1.02145	0.0306154	0.00675433
DUSP27	-7.67	-7.51	1.0213	0.0304137	0.00670984
DUXA	-7.91	-7.69	1.02861	0.0406941	0.00897738
ECHS1	5.355	5.4	0.991667	-0.0120728	0.00266367
EDNRA	-3.805	-3.745	1.01602	0.0229307	0.00505912
EFCAB10	-3.755	-3.645	1.03018	0.0428941	0.00946257
EFCAB6	-7.56	-7.38	1.02439	0.0347654	0.00766975
EFHA2	-7.78	-7.57	1.02774	0.0394769	0.00870891
EFHB	-7.84	-7.63	1.02752	0.0391706	0.00864137
EFNB1	-2.72	-2.68	1.01493	0.0213737	0.00471562
EFNB3	-5.53	-5.43	1.01842	0.0263273	0.00580841
EGFL6	-7.84	-7.61	1.03022	0.0429572	0.00947649
EGFR	-3.2675	-3.2075	1.01871	0.026738	0.00589901
EHMT1	-2.22	-2.24	0.991071	-0.0129391	0.00285478
EIF5A2	-3.21	-3.29	0.975684	-0.0355143	0.00783492
ELAVL4	-5.22	-5.36	0.973881	-0.0381832	0.00842359
ELK3	-2.56333	-2.54333	1.00786	0.0113005	0.00249328
ELMOD1	-7.81	-7.6	1.02763	0.0393231	0.00867501
ELMOD3	-1.62333	-1.62667	0.997951	-0.00295938	0.000652943
ELOVL3	-5.99	-5.96	1.00503	0.00724367	0.00159821
ELSPBP1	-6.82667	-6.97667	0.9785	-0.0313566	0.00691784
EML6	-7.93	-7.69	1.03121	0.0443373	0.00978084
ENAM	-7.93	-7.69	1.03121	0.0443373	0.00978084
ENPP5	-1.56	-1.59	0.981132	-0.0274807	0.00606286
EP400	-6	-5.91	1.01523	0.0218044	0.00481064
EPB42	-7.4	-7.19	1.02921	0.0415335	0.0091625
EPHA7	-7.65	-7.49	1.02136	0.030494	0.00672757
EPM2A	-7.11	-6.94	1.0245	0.0349139	0.0077025
EPYC	-7.75	-7.59	1.02108	0.0300964	0.00663986
ERBB4	-7.87	-7.64	1.0301	0.042791	0.00943983
ESAM	-7.58	-7.41	1.02294	0.0327243	0.00721953
ESR2	-6.915	-6.785	1.01916	0.0273804	0.00604074
ETV1	-2.09	-2.14	0.976636	-0.0341079	0.00752471
EVI5L	-7.9	-7.67	1.02999	0.0426261	0.00940346
EYA1	-7.55	-7.36	1.02582	0.0367709	0.00811209
EYA2	-7.58	-7.43	1.02019	0.0288356	0.00636174
EYS	-7.75	-7.54	1.02785	0.0396318	0.00874308
F13B	-7.64	-7.48	1.02139	0.0305344	0.00673647
F8	-7.51	-7.36	1.02038	0.0291071	0.00642164
F9	-5.83	-5.685	1.02551	0.0363355	0.00801606
FAR2	1.49	1.48	1.00676	0.00971515	0.00214349
FAT3	-7.81	-7.63	1.02359	0.0336395	0.0074214
FAU	8.58333	8.80667	0.97464	-0.037058	0.00817542
FBXL18	-6.07	-6.04	1.00497	0.00714797	0.00157709
FBXL7	-7.86	-7.69	1.02211	0.0315457	0.00695955
FBXO16	-7.85	-7.61	1.03154	0.0447962	0.00988205
FBXO17	-4.94	-4.99	0.98998	-0.0145288	0.00320551
FBXO18	-1.98	-1.99	0.994975	-0.007268	0.00160357
FBXO31	1.785	1.83	0.97541	-0.0359196	0.00792432
FBXO46	-5.72	-5.62	1.01779	0.025445	0.00561379
FCGRT	5.11	5.16	0.99031	-0.0140478	0.00309939
FDFT1	3.83	3.72	1.02957	0.0420418	0.0092746
FGB	-7.56333	-7.52667	1.00487	0.00701112	0.0015469
FGD1	-4.68	-4.765	0.982162	-0.0259677	0.00572909
FGF12	-7.61	-7.57	1.00528	0.00760315	0.00167752
FGF14	-6.13	-6.27333	0.977152	-0.0333451	0.00735647
FGF18	-2.44	-2.51	0.972112	-0.0408062	0.0090021
FGF20	-7.63	-7.47	1.02142	0.0305748	0.00674539
FGF5	-7.89	-7.66	1.03003	0.0426809	0.00941555
FGFR1OP2	1.55	1.57	0.987261	-0.0184963	0.00408084
FGG	-7.69	-7.51	1.02397	0.0341707	0.00753857
FKBP6	-7.59	-7.43	1.02153	0.0307377	0.00678131
FLT3	-3.83	-3.84	0.997396	-0.00376192	0.000830012
FMO3	-7.58	-7.39	1.02571	0.0366235	0.00807958
FOXF1	-3.16	-3.2	0.9875	-0.0181473	0.00400385
FOXI3	-7.45	-7.29	1.02195	0.0313216	0.00691012
FOXP3	-7.42	-7.45	0.995973	-0.00582124	0.00128437
FPR2	-7.82	-7.63	1.0249	0.0354855	0.00782859
FREM2	-7.18	-7.22	0.99446	-0.00801499	0.00176838
FRMD3	-4.4	-4.41	0.997732	-0.00327513	0.00072261
FRMD4B	-5.39	-5.27	1.02277	0.0324823	0.00716615
FRMD6	-5.56	-5.45	1.02018	0.0288287	0.0063602
FRMD7	-7.67	-7.53	1.01859	0.0265767	0.00586344
FRMPD4	-7.64	-7.48	1.02139	0.0305344	0.00673647
FSCN1	-2.39	-2.41	0.991701	-0.0120225	0.00265257
FSHR	-7.81	-7.58	1.03034	0.0431247	0.00951343
FSTL4	-7.78	-7.57	1.02774	0.0394769	0.00870891
FUK	-1.425	-1.43	0.996503	-0.00505323	0.00111492
FUT1	-5.18	-5.28	0.981061	-0.0275858	0.00608605
FUT9	-7.86	-7.62	1.0315	0.0447383	0.00986928
GABARAP	4.72	4.645	1.01615	0.0231083	0.00509829
GABRA1	-7.7	-7.51	1.0253	0.0360455	0.0079521
GABRA2	-7.88	-7.64	1.03141	0.044623	0.00984385
GABRP	-7.58	-7.43	1.02019	0.0288356	0.00636174
GABRR1	-7.56	-7.37	1.02578	0.0367216	0.00810122
GAD1	-7.75	-7.57	1.02378	0.033903	0.00747952
GALNT1	5.2	5.12	1.01562	0.0223678	0.00493494
GALNT10	-3.44	-3.35	1.02687	0.0382475	0.00843777
GALNT12	5.39	5.46	0.987179	-0.0186157	0.00410717
GAPDH	6.31429	6.41714	0.983972	-0.0233116	0.00514314
GBA3	-7.65	-7.51	1.01864	0.0266468	0.00587891
GBX1	-7.55	-7.37	1.02442	0.034812	0.00768003
GCNT4	-7.82	-7.63	1.0249	0.0354855	0.00782859
GDAP1	-7.75	-7.59	1.02108	0.0300964	0.00663986
GDAP1L1	-5.4	-5.32	1.01504	0.0215332	0.00475081
GDF3	-7.63	-7.45	1.02416	0.0344426	0.00759855
GDF5	-7.82	-7.63	1.0249	0.0354855	0.00782859
GEN1	-1.27	-1.29	0.984496	-0.0225426	0.00497349
GFER	1.885	1.86	1.01344	0.0192619	0.00424974
GFRAL	-7.74	-7.57	1.02246	0.0320403	0.00706864
GGCX	-1.27	-1.28	0.992188	-0.0113153	0.00249654
GIPR	-7.73	-7.55	1.02384	0.0339918	0.0074991
GJB1	3.8425	3.94	0.975254	-0.0361504	0.00797522
GJC1	-3.51	-3.53	0.994334	-0.00819715	0.00180857
GJD2	-4.5	-4.42	1.0181	0.0258786	0.00570944
GKAP1	-1.785	-1.76	1.0142	0.0203486	0.00448949
GLB1	-2.60667	-2.68333	0.971429	-0.0418202	0.00922573
GLB1L2	-6.17667	-6.22	0.993033	-0.0100861	0.00222534
GLG1	1.8425	1.8	1.02361	0.0336677	0.00742762
GLMN	-1.59333	-1.62667	0.979508	-0.0298705	0.00659003
GLRA1	-7.85	-7.65	1.02614	0.0372329	0.00821399
GLT25D2	-7.82	-7.6	1.02895	0.0411692	0.00908216
GMEB1	-2.46	-2.4	1.025	0.0356239	0.0078591
GNA12	-3.6	-3.51	1.02564	0.0365259	0.00805805
GNAT1	-7.61	-7.43	1.02423	0.0345342	0.00761876
GNB1	1.8875	1.9025	0.992116	-0.0114198	0.00251959
GNB4	-4.52	-4.56	0.991228	-0.0127111	0.00280447
GNG7	-2.625	-2.575	1.01942	0.027745	0.00612116
GNGT1	-7.81	-7.62	1.02493	0.0355316	0.00783873
GOLGA3	-3.61	-3.56	1.01404	0.0201216	0.0044394
GORAB	-3.01	-3.08	0.977273	-0.0331669	0.00731715
GPAM	-3.74	-3.77	0.992042	-0.0115263	0.00254307
GPAT2	-4.765	-4.625	1.03027	0.0430228	0.00949097
GPR109A	-7.55	-7.37	1.02442	0.034812	0.00768003
GPR110	-7.54	-7.55	0.998675	-0.00191212	0.000421882
GPR111	-7.69	-7.54	1.01989	0.0284191	0.00626985
GPR126	-5.41	-5.33	1.01501	0.0214931	0.00474196
GPR137C	-7.57	-7.4	1.02297	0.032768	0.00722917
GPR141	-4.75	-4.71	1.00849	0.0122005	0.00269182
GPR143	-5.63	-5.5	1.02364	0.0337033	0.00743547
GPR176	-5.5	-5.37	1.02421	0.0345095	0.0076133
GPR4	-4.81	-4.8	1.00208	0.00300249	0.000662455
GPR87	-7.79	-7.58	1.0277	0.0394255	0.00869758
GPRC6A	-7.72	-7.55	1.02252	0.0321242	0.00708716
GRAMD1A	-2.95	-2.87	1.02787	0.0396642	0.00875024
GRAMD2	-7.43	-7.35	1.01088	0.015618	0.00344581
GRAP	-3.01	-3.02	0.996689	-0.00478506	0.00105575
GRB14	-5.375	-5.45	0.986239	-0.0199915	0.00441069
GRHL2	-7.53	-7.34	1.02589	0.0368698	0.00813391
GRIA1	-7.48	-7.3	1.02466	0.0351418	0.00775277
GRIK4	-7.71	-7.52	1.02527	0.0359982	0.00794166
GRIN1	-7.91	-7.67	1.03129	0.0444511	0.00980595
GRIN2B	-7.84	-7.62	1.02887	0.0410627	0.00905866
GRM7	-7.82	-7.63	1.0249	0.0354855	0.00782859
GRM8	-7.64	-7.48	1.02139	0.0305344	0.00673647
GSN	2.75667	2.72333	1.01224	0.0175513	0.00387234
GSTA3	6.265	6.355	0.985838	-0.0205776	0.00454
GSTK1	5.925	5.96	0.994128	-0.00849718	0.00187477
GSTM3	2.91	2.98	0.97651	-0.0342932	0.00756558
GTF2E1	-2.92	-2.85	1.02456	0.0350065	0.00772291
GTF2H2	-0.685	-0.67	1.02239	0.0319429	0.00704716
GTF2IRD1	-7.48	-7.32	1.02186	0.0311946	0.00688211
GTPBP1	-3.985	-3.93	1.01399	0.0200504	0.00442369
GYPA	-7.42	-7.23	1.02628	0.0374235	0.00825604
GYS2	-6.32	-6.125	1.03184	0.0452147	0.00997434
HADHA	4.01	4.13667	0.96938	-0.0448665	0.00989755
HADHB	5.3	5.28	1.00379	0.00545443	0.00120344
HAND1	-2.7	-2.65	1.01887	0.026967	0.00594954
HAPLN3	-3.93	-3.98	0.987437	-0.0182391	0.00402409
HARBI1	-4.59	-4.64	0.989224	-0.0156307	0.00344861
HAUS2	-3.48	-3.53	0.985836	-0.0205809	0.00454072
HAUS7	-7.65	-7.47	1.0241	0.0343515	0.00757845
HAVCR1	-5.68	-5.77	0.984402	-0.0226804	0.0050039
HBG2	-7.62	-7.44	1.02419	0.0344884	0.00760864
HCRTR2	-7.69	-7.51	1.02397	0.0341707	0.00753857
HDGF	3.03	3.08	0.983766	-0.0236126	0.00520954
HDLBP	0.676667	0.656667	1.03046	0.0432841	0.00954858
HEATR5B	-2.09667	-2.03333	1.03115	0.0442508	0.00976177
HECW1	-7.51	-7.3	1.02877	0.0409164	0.00902641
HEMGN	-7.26	-7.05333	1.0293	0.0416643	0.00919136
HEPHL1	-7.18	-7.22	0.99446	-0.00801499	0.00176838
HERPUD1	3.555	3.59	0.990251	-0.0141343	0.00311848
HESX1	-4.93	-4.85	1.01649	0.0236029	0.00520741
HEXDC	-2.14	-2.08	1.02885	0.0410273	0.00905086
HFM1	-7.84	-7.61	1.03022	0.0429572	0.00947649
HHIPL2	-7.74	-7.56	1.02381	0.0339473	0.0074893
HIGD2A	-3.02	-3.11	0.971061	-0.042366	0.00934611
HMGXB3	-3.42	-3.46	0.988439	-0.0167757	0.00370124
HNF4G	4.09	4.21	0.971496	-0.0417194	0.0092035
HOXA13	-7.6	-7.43	1.02288	0.0326372	0.00720032
HOXA9	-7.72	-7.54	1.02387	0.0340363	0.00750893
HOXB1	2.69	2.75	0.978182	-0.0318254	0.00702126
HOXC4	-7.82	-7.58	1.03166	0.0449708	0.00992054
HOXC5	-7.57	-7.41	1.02159	0.0308198	0.00679942
HPCA	-7.53	-7.34	1.02589	0.0368698	0.00813391
HPS4	-4.8	-4.92	0.97561	-0.0356239	0.0078591
HRASLS	-5.92	-5.78	1.02422	0.0345277	0.00761731
HRASLS5	-7.39	-7.18	1.02925	0.0415905	0.00917508
HRH4	-7.27	-7.18	1.01253	0.0179715	0.00396505
HS3ST2	-7.48	-7.29	1.02606	0.0371195	0.00818897
HS6ST2	-7.57	-7.43	1.01884	0.0269311	0.00594161
HSPA4L	-3.15	-3.22	0.978261	-0.0317089	0.00699554
HTR2A	-7.5	-7.31	1.02599	0.0370192	0.00816685
HTR3A	-7.535	-7.355	1.02447	0.0348822	0.0076955
HTR3B	-5.6	-5.56	1.00719	0.0103419	0.00228178
HTR3E	-7.56	-7.36	1.02717	0.0386805	0.00853327
HYAL4	-7.89	-7.65	1.03137	0.0445656	0.00983118
ICAM4	-7.81	-7.58	1.03034	0.0431247	0.00951343
IDH1	3.795	3.725	1.01879	0.0268595	0.00592581
IGDCC3	-7.64	-7.42	1.02965	0.0421535	0.00929923
IGF2BP1	-7.68	-7.5	1.024	0.0342157	0.0075485
IGHMBP2	-2.24	-2.23	1.00448	0.00645502	0.0014242
IGSF11	-6.97	-6.855	1.01678	0.024002	0.00529545
IGSF22	-7.53	-7.36	1.0231	0.0329441	0.00726801
IL10RB	4.435	4.45	0.996629	-0.00487123	0.00107477
IL11	-2.86	-2.93	0.976109	-0.0348855	0.00769624
IL17F	-6.02	-5.95	1.01176	0.0168738	0.00372288
IL17RD	-7.92	-7.68	1.03125	0.0443941	0.00979338
IL18BP	2.6	2.635	0.986717	-0.0192913	0.00425623
IL1B	-7.57667	-7.40667	1.02295	0.0327389	0.00722274
IL1F5	-7.53	-7.32	1.02869	0.0408062	0.0090021
IL1F8	-7.77	-7.6	1.02237	0.0319152	0.00704105
IL1R1	-7.9	-7.68	1.02865	0.0407463	0.0089889
IL20	-6.45	-6.29	1.02544	0.0362391	0.0079948
IL4	-3.625	-3.545	1.02257	0.0321954	0.00710285
IL5RA	-5.48	-5.4	1.01481	0.0212165	0.00468094
ILDR2	-7.82	-7.61	1.0276	0.0392722	0.00866377
ILVBL	4.1	4.205	0.97503	-0.0364819	0.00804835
INA	-7.65	-7.49	1.02136	0.030494	0.00672757
INMT	-7.7	-7.52	1.02394	0.0341258	0.00752866
INO80C	-1.71	-1.67	1.02395	0.0341482	0.00753361
INSL6	-7.81	-7.58	1.03034	0.0431247	0.00951343
INTU	-7.78	-7.57	1.02774	0.0394769	0.00870891
IP6K2	-2.44	-2.49	0.97992	-0.0292646	0.00645637
IQCF3	-7.45	-7.25	1.02759	0.0392594	0.00866096
IQCG	-7.76	-7.58	1.02375	0.0338588	0.00746977
IQCK	-5.61	-5.52	1.0163	0.0233325	0.00514776
IQSEC2	-7.79	-7.61	1.02365	0.0337269	0.00744067
IQSEC3	-7.75	-7.55	1.02649	0.0377197	0.00832135
IRF3	3.2	3.15	1.01587	0.0227201	0.00501265
IRF8	-2.39	-2.37	1.00844	0.0121236	0.00267486
IRG1	-7.84	-7.61	1.03022	0.0429572	0.00947649
IRS4	-5.74	-5.62	1.02135	0.0304806	0.00672461
IRX2	-7.71	-7.52	1.02527	0.0359982	0.00794166
ITGA4	-0.89	-0.91	0.978022	-0.0320612	0.00707326
ITGAD	-7.72	-7.55	1.02252	0.0321242	0.00708716
ITGAM	-5.8075	-5.9325	0.97893	-0.0307229	0.00677806
JAKMIP2	-7.61	-7.565	1.00595	0.00855637	0.00188783
JDP2	-3.925	-4	0.98125	-0.0273073	0.00602461
JPH3	-7.78	-7.61	1.02234	0.0318737	0.0070319
JPH4	-2.62	-2.66	0.984962	-0.0218594	0.00482278
KATNAL2	-7.78	-7.58	1.02639	0.0375723	0.00828885
KATNB1	-2.335	-2.265	1.03091	0.0439115	0.00968694
KAZALD1	-2.265	-2.245	1.00891	0.0127956	0.00282313
KBTBD10	-7.58	-7.39	1.02571	0.0366235	0.00807958
KBTBD5	-7.68	-7.51	1.02264	0.0322934	0.00712448
KCND1	-7.77	-7.61	1.02102	0.0300181	0.00662259
KCNH1	-7.73	-7.55	1.02384	0.0339918	0.0074991
KCNH8	-7.51	-7.36	1.02038	0.0291071	0.00642164
KCNJ1	-7.61	-7.68	0.990885	-0.0132099	0.00291452
KCNJ10	-7.67	-7.46	1.02815	0.0400509	0.00883553
KCNJ4	-5.63	-5.8	0.97069	-0.042918	0.00946784
KCNJ5	-7.66	-7.5	1.02133	0.0304538	0.00671869
KCNMA1	-7.225	-7.34	0.984332	-0.0227825	0.00502642
KCNMB2	-7.83	-7.59	1.03162	0.0449124	0.00990768
KCNS1	-2.66	-2.59	1.02703	0.0384741	0.00848776
KCNS2	-7.71	-7.51	1.02663	0.037918	0.00836509
KCNV2	-7.21	-7.25	0.994483	-0.00798174	0.00176105
KCTD16	-7.63	-7.48	1.02005	0.0286448	0.00631964
KCTD2	-3.53	-3.5	1.00857	0.0123133	0.00271671
KCTD9	-2.49	-2.56	0.972656	-0.0399981	0.00882387
KDM4A	-0.95	-0.97	0.979381	-0.0300572	0.00663122
KEAP1	3.08	3.125	0.9856	-0.0209258	0.00461682
KIF14	-7.52	-7.36	1.02174	0.0310269	0.00684511
KIF1A	-6.635	-6.705	0.98956	-0.0151409	0.00334055
KIF3B	-4.815	-4.675	1.02995	0.0425694	0.00939097
KIF5B	0.9425	0.96	0.981771	-0.0265418	0.00585573
KIF6	-7.5	-7.31	1.02599	0.0370192	0.00816685
KLC2	-4.84	-4.88333	0.991126	-0.0128592	0.00283716
KLC3	-3.8	-3.92	0.969388	-0.0448542	0.00989485
KLF5	4.505	4.475	1.0067	0.00963942	0.00212678
KLHL10	-6.12	-6.01	1.0183	0.0261667	0.00577298
KLHL12	-3.04	-2.96	1.02703	0.0384741	0.00848776
KLHL4	-7.82	-7.59	1.0303	0.0430687	0.00950108
KLHL6	-7.82	-7.59	1.0303	0.0430687	0.00950108
KLK10	-7.43	-7.48	0.993316	-0.00967606	0.00213487
KLK12	-7.87	-7.66	1.02742	0.0390192	0.00860798
KLK13	-7.69	-7.54	1.01989	0.0284191	0.00626985
KLK14	-5.33	-5.25	1.01524	0.0218181	0.00481367
KLK6	-7.68	-7.49	1.02537	0.0361406	0.00797307
KLK7	-7.56	-7.38	1.02439	0.0347654	0.00766975
KLK9	-7.54	-7.39	1.0203	0.0289902	0.00639583
KPNA3	-2.566	-2.646	0.969766	-0.0442919	0.00977083
KPNA6	-2.455	-2.47	0.993927	-0.00878802	0.00193894
KRR1	1.44	1.40667	1.0237	0.0337883	0.00745422
KRT23	-7.86	-7.65	1.02745	0.0390696	0.00861908
KRT26	-7.53	-7.63	0.986894	-0.0190332	0.00419928
KRT40	-7.58	-7.41	1.02294	0.0327243	0.00721953
KRT72	-7.8	-7.62	1.02362	0.0336831	0.00743102
KRT73	-7.56	-7.41	1.02024	0.0289127	0.00637874
KRT9	-7.64	-7.47	1.02276	0.0324644	0.0071622
LACE1	-3.97	-3.87	1.02584	0.0368054	0.00811971
LAMB4	-7.88	-7.66	1.02872	0.0408512	0.00901203
LAMP1	5.21	5.205	1.00096	0.00138521	0.000305626
LASS3	-7.71333	-7.50667	1.02753	0.039182	0.00864389
LASS6	-2.93	-3.02	0.970199	-0.0436479	0.00962881
LBX1	-6.87	-6.73	1.0208	0.0297036	0.00655321
LCMT1	-3.905	-3.94	0.991117	-0.0128731	0.00284022
LCN12	-6.05	-6	1.00833	0.0119726	0.00264156
LCN15	-5.66	-5.67	0.998236	-0.00254668	0.000561888
LCTL	-6.08	-5.93333	1.02472	0.0352285	0.00777189
LDHC	-7.82	-7.61	1.0276	0.0392722	0.00866377
LDLRAP1	-5.73	-5.88	0.97449	-0.037281	0.0082246
LDOC1	-2.69	-2.66	1.01128	0.0161799	0.00356979
LEMD3	-3.38	-3.48	0.971264	-0.0420641	0.00927951
LEPR	-7.665	-7.47	1.0261	0.0371775	0.00820178
LEPROTL1	3.68	3.75	0.981333	-0.0271848	0.00599759
LGALS9	5.025	5.035	0.998014	-0.00286818	0.000632823
LGI1	-5.68	-5.855	0.970111	-0.0437782	0.00965756
LGI2	-7.81	-7.63	1.02359	0.0336395	0.0074214
LGI3	-6	-6.13	0.978793	-0.0309246	0.00682254
LGSN	-7.53	-7.35	1.02449	0.0349056	0.00770067
LHB	-2.93	-2.86	1.02448	0.0348855	0.00769624
LHX1	-7.74	-7.54	1.02653	0.037769	0.00833224
LHX3	-7.4	-7.21	1.02635	0.037526	0.00827864
LHX5	-7.76	-7.55	1.02781	0.03958	0.00873166
LHX6	-7.68	-7.52	1.02128	0.0303736	0.00670101
LIM2	-7.8	-7.61	1.02497	0.0355777	0.00784891
LIPG	-5.51	-5.41	1.01848	0.0264237	0.00582969
LIPI	-5.32	-5.47	0.972578	-0.0401146	0.00884957
LIPJ	-7.46	-7.23	1.03181	0.04518	0.00996668
LLGL1	-4.685	-4.73	0.990486	-0.0137911	0.00304277
LMBR1L	-3.83	-3.725	1.02819	0.040104	0.00884722
LMOD3	-7.695	-7.515	1.02395	0.0341482	0.00753361
LOC100499480	8.4	8.536	0.984067	-0.0231708	0.00511209
LOC403525	-7.4	-7.19	1.02921	0.0415335	0.0091625
LOC403889	-7.73	-7.55	1.02384	0.0339918	0.0074991
LOC442975	-7.75	-7.54	1.02785	0.0396318	0.00874308
LOC474524	3.32	3.42	0.97076	-0.0428131	0.0094447
LOC474768	-5.99	-6.05	0.990083	-0.0143791	0.0031725
LOC474790	-7.735	-7.555	1.02383	0.0339695	0.0074942
LOC475019	-7.78	-7.55	1.03046	0.0432935	0.00955066
LOC475165	-7.71	-7.53	1.0239	0.034081	0.00751878
LOC475216	-7.87	-7.66	1.02742	0.0390192	0.00860798
LOC475419	-6.875	-6.93	0.992063	-0.0114956	0.00253632
LOC475503	-3.3	-3.4	0.970588	-0.0430687	0.00950108
LOC475522	-7.76	-7.54	1.02918	0.0414921	0.00915338
LOC475540	-3.41	-3.45	0.988406	-0.0168246	0.00371203
LOC475615	-2.855	-2.82	1.01241	0.0177956	0.00392624
LOC475691	-7.58	-7.38	1.0271	0.038577	0.00851045
LOC475861	-7.76	-7.55	1.02781	0.03958	0.00873166
LOC475905	-5.77	-5.82	0.991409	-0.0124478	0.0027464
LOC476040	6.71	6.58	1.01976	0.0282252	0.00622708
LOC476114	-7.89	-7.66	1.03003	0.0426809	0.00941555
LOC476248	-7.83	-7.59	1.03162	0.0449124	0.00990768
LOC476315	5.845	5.695	1.02634	0.0375072	0.00827449
LOC476444	4.92	4.79	1.02714	0.0386327	0.00852272
LOC476669	4.57	4.6	0.993478	-0.0094397	0.00208272
LOC477365	-7.88	-7.67	1.02738	0.0389691	0.00859691
LOC477366	-7.52	-7.29	1.03155	0.0448138	0.00988594
LOC477368	-7.64	-7.47	1.02276	0.0324644	0.0071622
LOC477425	-7.49	-7.32	1.02322	0.0331221	0.00730727
LOC477486	-5.35	-5.26	1.01711	0.0244761	0.00540004
LOC477508	7.535	7.47	1.0087	0.0124993	0.00275775
LOC477569	3.35	3.34	1.00299	0.00431299	0.000951598
LOC477671	-2.165	-2.12	1.02123	0.0303028	0.00668538
LOC477721	-3.22333	-3.30333	0.975782	-0.0353692	0.00780292
LOC477831	-7.53	-7.34	1.02589	0.0368698	0.00813391
LOC477837	-1.52	-1.495	1.01672	0.0239258	0.00527865
LOC477942	3.09	3.17	0.974763	-0.036876	0.00813527
LOC477944	5.415	5.315	1.01881	0.0268916	0.00593291
LOC478114	2.1	2.05	1.02439	0.0347654	0.00766975
LOC478170	-0.54	-0.55	0.981818	-0.0264722	0.00584038
LOC478206	-7.61	-7.44	1.02285	0.0325938	0.00719075
LOC478419	5.27	5.37	0.981378	-0.0271191	0.00598309
LOC478449	-4.295	-4.22	1.01777	0.0254151	0.00560719
LOC478524	-7.79	-7.62	1.02231	0.0318323	0.00702278
LOC478639	6.7	6.725	0.996283	-0.00537317	0.00118551
LOC478692	-7.88	-7.67	1.02738	0.0389691	0.00859691
LOC478790	-4.84	-4.93	0.981744	-0.0265806	0.00586429
LOC478791	-7.105	-6.9	1.02971	0.0422383	0.00931794
LOC478990	-2.12	-2.08	1.01923	0.0274807	0.00606286
LOC478994	-5.44	-5.5	0.989091	-0.015825	0.00349148
LOC479007	-7.86	-7.62	1.0315	0.0447383	0.00986928
LOC479235	-2.49	-2.46	1.0122	0.0174874	0.00385825
LOC479395	-6.55	-6.42	1.02025	0.0289216	0.00638071
LOC479407	-6.91	-6.845	1.0095	0.0136352	0.00300836
LOC479559	-7.71	-7.54	1.02255	0.0321663	0.00709645
LOC479662	-5.77	-5.8	0.994828	-0.00748158	0.0016507
LOC479686	-3.3	-3.4	0.970588	-0.0430687	0.00950108
LOC479717	4.3025	4.2975	1.00116	0.00167755	0.000370128
LOC479816	-7.77	-7.56	1.02778	0.0395284	0.00872027
LOC479826	-3.49	-3.58	0.97486	-0.0367326	0.00810363
LOC480033	-7.72	-7.53	1.02523	0.035951	0.00793125
LOC480097	-7.8	-7.6	1.02632	0.0374747	0.00826732
LOC480151	-6.06	-5.88	1.03061	0.0435016	0.00959656
LOC480351	-7.55	-7.37	1.02442	0.034812	0.00768003
LOC480468	-4.53	-4.41	1.02721	0.0387324	0.00854472
LOC480476	-7.82	-7.58	1.03166	0.0449708	0.00992054
LOC480499	-7.62	-7.435	1.02488	0.0354583	0.00782257
LOC480513	2.65	2.635	1.00569	0.0081894	0.00180686
LOC480628	-2.295	-2.33	0.984979	-0.0218358	0.00481757
LOC480643	-7.77	-7.56	1.02778	0.0395284	0.00872027
LOC480791	3.82	3.785	1.00925	0.0132793	0.00292985
LOC481133	-7.32	-7.47	0.97992	-0.0292646	0.00645637
LOC481139	-7.75	-7.56	1.02513	0.0358101	0.00790017
LOC481173	-7.87	-7.64	1.0301	0.042791	0.00943983
LOC481348	-2.69	-2.66	1.01128	0.0161799	0.00356979
LOC481374	-7.48	-7.31	1.02326	0.0331669	0.00731715
LOC481438	-7.87	-7.66	1.02742	0.0390192	0.00860798
LOC481600	-7.73	-7.55	1.02384	0.0339918	0.0074991
LOC481633	-7.42	-7.23	1.02628	0.0374235	0.00825604
LOC481649	-7.82	-7.63	1.0249	0.0354855	0.00782859
LOC481829	-7.78	-7.59	1.02503	0.0356703	0.00786933
LOC481879	-7.89	-7.65	1.03137	0.0445656	0.00983118
LOC481962	-1.42	-1.38	1.02899	0.0412227	0.00909395
LOC482125	-7.87	-7.65	1.02876	0.0409039	0.00902364
LOC482210	-7.83	-7.64	1.02487	0.0354397	0.00781847
LOC482225	-7.81	-7.62	1.02493	0.0355316	0.00783873
LOC482239	-7.52	-7.37	1.02035	0.029068	0.00641301
LOC482303	-7.92	-7.68	1.03125	0.0443941	0.00979338
LOC482312	-7.62	-7.45	1.02282	0.0325506	0.00718121
LOC482418	-7.76	-7.54	1.02918	0.0414921	0.00915338
LOC482441	-4.96	-5	0.992	-0.011588	0.00255669
LOC482470	-4.17	-4.06	1.02709	0.0385677	0.00850838
LOC482725	-7.69	-7.54	1.01989	0.0284191	0.00626985
LOC482733	-4.86	-4.89	0.993865	-0.00887815	0.00195882
LOC482755	-7.14	-7.29	0.979424	-0.0299947	0.00661743
LOC482765	-5.27	-5.3	0.99434	-0.0081894	0.00180686
LOC482849	-7.65	-7.44	1.02823	0.0401571	0.00885895
LOC482907	-7.78	-7.59	1.02503	0.0356703	0.00786933
LOC483003	-4.42	-4.34	1.01843	0.0263513	0.00581372
LOC483169	-3.135	-3.115	1.00642	0.00923328	0.00203718
LOC483450	-7.83	-7.64	1.02487	0.0354397	0.00781847
LOC483455	-7.79	-7.62	1.02231	0.0318323	0.00702278
LOC483474	-7.87	-7.66	1.02742	0.0390192	0.00860798
LOC483479	-7.81	-7.63	1.02359	0.0336395	0.0074214
LOC483500	-7.63	-7.46	1.02279	0.0325074	0.00717169
LOC483501	-6.86	-6.66	1.03003	0.0426864	0.00941677
LOC483521	-7.75	-7.59	1.02108	0.0300964	0.00663986
LOC483559	-7.74	-7.55	1.02517	0.0358569	0.0079105
LOC483723	-1.18	-1.21	0.975207	-0.0362202	0.00799062
LOC483802	-7.78	-7.57	1.02774	0.0394769	0.00870891
LOC483905	-7.81	-7.62	1.02493	0.0355316	0.00783873
LOC483936	-7.7	-7.55	1.01987	0.0283818	0.00626163
LOC483997	-7.78	-7.58	1.02639	0.0375723	0.00828885
LOC484017	-7.81	-7.63	1.02359	0.0336395	0.0074214
LOC484026	-7.77	-7.56	1.02778	0.0395284	0.00872027
LOC484101	-7.55	-7.33	1.03001	0.0426634	0.0094117
LOC484191	-7.77	-7.56	1.02778	0.0395284	0.00872027
LOC484249	-5.23	-5.11	1.02348	0.0334877	0.00738791
LOC484468	-5.41	-5.34	1.01311	0.0187889	0.00414537
LOC484475	2.96	3.04	0.973684	-0.0384741	0.00848776
LOC484859	-7.25	-7.13	1.01683	0.0240789	0.00531242
LOC484867	-4.91	-4.87	1.00821	0.0118013	0.00260375
LOC484873	-4.67	-4.78	0.976987	-0.0335881	0.00741005
LOC484934	-2.99	-3.04	0.983553	-0.0239258	0.00527865
LOC484972	-7.66	-7.46	1.02681	0.0381688	0.00842041
LOC484982	-5.37	-5.29	1.01512	0.0216544	0.00477754
LOC485076	4.91	4.79	1.02505	0.0356974	0.00787531
LOC485235	-7.82	-7.58	1.03166	0.0449708	0.00992054
LOC485270	-7.93	-7.69	1.03121	0.0443373	0.00978084
LOC485288	-7.73	-7.57	1.02114	0.0301751	0.00665722
LOC485290	-7.62	-7.44	1.02419	0.0344884	0.00760864
LOC485295	-7.75	-7.57	1.02378	0.033903	0.00747952
LOC485308	-4.1	-4.02	1.0199	0.0284284	0.00627191
LOC485321	-7.84	-7.62	1.02887	0.0410627	0.00905866
LOC485325	-7.94	-7.7	1.03117	0.0442806	0.00976833
LOC485345	-7.75	-7.57	1.02378	0.033903	0.00747952
LOC485372	-7.71	-7.54	1.02255	0.0321663	0.00709645
LOC485415	-7.9	-7.68	1.02865	0.0407463	0.0089889
LOC485435	-7.7	-7.51	1.0253	0.0360455	0.0079521
LOC485538	-7.64	-7.46	1.02413	0.034397	0.00758849
LOC485562	-7.69	-7.515	1.02329	0.0332105	0.00732677
LOC485714	-7.5	-7.31	1.02599	0.0370192	0.00816685
LOC485750	-7.53	-7.35	1.02449	0.0349056	0.00770067
LOC486000	-3.25	-3.19	1.01881	0.0268833	0.00593107
LOC486445	-4.79	-4.69	1.02132	0.0304377	0.00671515
LOC486544	-7.45	-7.4	1.00676	0.00971515	0.00214349
LOC486584	-7.91	-7.67	1.03129	0.0444511	0.00980595
LOC486688	-7.58	-7.37	1.02849	0.0405332	0.0089419
LOC486972	-6.89	-6.69	1.0299	0.0424978	0.00937517
LOC486982	-7.85	-7.63	1.02883	0.0410096	0.00904696
LOC487009	-2.88	-2.83	1.01767	0.0252668	0.00557446
LOC487248	-7.52	-7.33	1.02592	0.0369195	0.00814486
LOC488139	-7.81	-7.62	1.02493	0.0355316	0.00783873
LOC488146	-7.81	-7.58	1.03034	0.0431247	0.00951343
LOC488147	-7.84	-7.61	1.03022	0.0429572	0.00947649
LOC488253	-7.45	-7.27	1.02476	0.0352851	0.00778436
LOC488312	-7.21	-7.22	0.998615	-0.00199958	0.000441178
LOC488463	2.32	2.38	0.97479	-0.0368368	0.00812662
LOC488474	-7.77	-7.56	1.02778	0.0395284	0.00872027
LOC488535	0.97	0.95	1.02105	0.0300572	0.00663122
LOC488576	-6.42	-6.285	1.02148	0.0306606	0.0067643
LOC488612	-7.64	-7.46	1.02413	0.034397	0.00758849
LOC488783	-5.01	-4.88	1.02664	0.0379295	0.00836762
LOC488873	-4.45	-4.48	0.993304	-0.0096934	0.00213869
LOC488882	-7.77	-7.58	1.02507	0.0357167	0.00787958
LOC489001	-7.82	-7.64	1.02356	0.033596	0.0074118
LOC489137	-7.68	-7.5	1.024	0.0342157	0.0075485
LOC489189	-7.79	-7.6	1.025	0.0356239	0.0078591
LOC489294	1.925	1.885	1.02122	0.0302939	0.00668343
LOC489314	-7.55	-7.33	1.03001	0.0426634	0.0094117
LOC489325	-7.76	-7.57	1.0251	0.0357634	0.00788986
LOC489338	-7.9	-7.68	1.02865	0.0407463	0.0089889
LOC489341	-7.72	-7.53	1.02523	0.035951	0.00793125
LOC489347	-7.34	-7.54	0.973475	-0.0387845	0.0085562
LOC489360	-7.91	-7.67	1.03129	0.0444511	0.00980595
LOC489394	-7.8	-7.61	1.02497	0.0355777	0.00784891
LOC489401	-7.84	-7.65	1.02484	0.0353939	0.00780837
LOC489434	-7.7	-7.52	1.02394	0.0341258	0.00752866
LOC489566	-7.87	-7.63	1.03145	0.0446806	0.00985655
LOC489681	-3.69	-3.64	1.01374	0.0196824	0.0043425
LOC489790	-7.27	-7.44	0.977151	-0.0333473	0.00735694
LOC489915	-7.87	-7.63	1.03145	0.0446806	0.00985655
LOC489934	-4.23	-4.24	0.997642	-0.0034066	0.000751617
LOC489979	-7.79	-7.61	1.02365	0.0337269	0.00744067
LOC490096	-3.13	-3.14	0.996815	-0.0046019	0.00101534
LOC490346	-6	-5.98	1.00334	0.00481702	0.0010628
LOC490399	-7.65	-7.68	0.996094	-0.00564656	0.00124583
LOC490565	-3.14	-3.1	1.0129	0.0184963	0.00408084
LOC490597	-7.8	-7.58	1.02902	0.0412763	0.00910577
LOC490601	-7.67	-7.5	1.02267	0.032336	0.00713387
LOC490635	-7.82	-7.63	1.0249	0.0354855	0.00782859
LOC490726	-7.61	-7.46	1.02011	0.0287208	0.00633642
LOC490887	-7.85	-7.61	1.03154	0.0447962	0.00988205
LOC490896	-5.44	-5.31	1.02448	0.0348948	0.00769828
LOC490964	-4.88	-4.79	1.01879	0.0268555	0.00592494
LOC491090	4.88	4.77	1.02306	0.0328919	0.00725649
LOC491116	-0.72	-0.71	1.01408	0.0201779	0.00445181
LOC491229	-7.68	-7.53	1.01992	0.0284564	0.0062781
LOC491279	-4.58	-4.695	0.975506	-0.0357776	0.00789299
LOC491435	-7.48	-7.29	1.02606	0.0371195	0.00818897
LOC491481	-7.8	-7.61	1.02497	0.0355777	0.00784891
LOC491627	-7.87	-7.66	1.02742	0.0390192	0.00860798
LOC491629	-7.56	-7.37	1.02578	0.0367216	0.00810122
LOC491639	-5.12	-5.19	0.986513	-0.0195907	0.00432228
LOC491696	3.08	3.145	0.979332	-0.0301297	0.00664719
LOC491820	-7.9	-7.66	1.03133	0.0445083	0.00981855
LOC491949	-3.5	-3.44	1.01744	0.0249464	0.00550378
LOC492040	-7.7	-7.48	1.02941	0.0418202	0.00922573
LOC492054	-7.83	-7.6	1.03026	0.0430129	0.00948877
LOC492149	-4.86	-4.81	1.0104	0.0149194	0.0032917
LOC492152	-7.32	-7.43	0.985195	-0.0215186	0.00474758
LOC492262	-7.69	-7.52	1.02261	0.0322509	0.00711511
LOC606785	-7.68	-7.49	1.02537	0.0361406	0.00797307
LOC606793	-7.81	-7.605	1.02696	0.0383743	0.00846574
LOC606804	3.17	3.23	0.981424	-0.0270513	0.00596814
LOC606856	-7.79	-7.6	1.025	0.0356239	0.0078591
LOC606910	-7.87	-7.63	1.03145	0.0446806	0.00985655
LOC607086	-2.44	-2.5	0.976	-0.0350469	0.00773184
LOC607214	-7.57	-7.41	1.02159	0.0308198	0.00679942
LOC607225	-7.58	-7.48	1.01337	0.0191596	0.00422716
LOC607239	-7.78	-7.58	1.02639	0.0375723	0.00828885
LOC607266	-3.75	-3.76	0.99734	-0.00384207	0.000847696
LOC607365	6.23	6.105	1.02048	0.0292409	0.00645113
LOC607515	-7.46	-7.28	1.02473	0.0352372	0.0077738
LOC607539	-7.64	-7.47	1.02276	0.0324644	0.0071622
LOC607723	-7.91	-7.68	1.02995	0.0425714	0.0093914
LOC607729	-6.80333	-6.75	1.0079	0.0113543	0.00250513
LOC607801	-7.41	-7.2	1.02917	0.0414766	0.00914996
LOC607807	-7.81	-7.6	1.02763	0.0393231	0.00867501
LOC607830	-2.71	-2.64	1.02652	0.0377549	0.00832913
LOC607848	-7.85	-7.65	1.02614	0.0372329	0.00821399
LOC607872	-7.77	-7.56	1.02778	0.0395284	0.00872027
LOC607953	-7.71	-7.52	1.02527	0.0359982	0.00794166
LOC608004	-7.52	-7.69	0.977893	-0.0322509	0.00711511
LOC608088	-7.8	-7.61	1.02497	0.0355777	0.00784891
LOC608302	-7.94	-7.7	1.03117	0.0442806	0.00976833
LOC608359	-7.51	-7.33	1.02456	0.0349997	0.00772142
LOC608376	-7.06	-7.22	0.977839	-0.0323307	0.0071327
LOC608457	-7.72	-7.53	1.02523	0.035951	0.00793125
LOC608479	7.39	7.56	0.977513	-0.0328119	0.00723884
LOC608493	-4.65	-4.51	1.03104	0.0441033	0.00972924
LOC608500	-7.77	-7.6	1.02237	0.0319152	0.00704105
LOC608537	-4.95	-4.98	0.993976	-0.00871722	0.00192332
LOC608561	-7.77	-7.59	1.02372	0.0338147	0.00746005
LOC608630	-7.62	-7.4	1.02973	0.0422657	0.00932399
LOC608645	-7.63	-7.47	1.02142	0.0305748	0.00674539
LOC608660	-7.72	-7.55	1.02252	0.0321242	0.00708716
LOC608685	-7.74	-7.57	1.02246	0.0320403	0.00706864
LOC608733	-1.14	-1.15	0.991304	-0.0126	0.00277998
LOC608808	-7.7	-7.52	1.02394	0.0341258	0.00752866
LOC608876	-7.58	-7.42	1.02156	0.0307787	0.00679035
LOC608891	-3.72	-3.65	1.01918	0.0274062	0.00604641
LOC608960	4.5	4.46	1.00897	0.0128813	0.00284203
LOC609066	-7.62	-7.67	0.993481	-0.00943558	0.00208181
LOC609138	-7.71	-7.53	1.0239	0.034081	0.00751878
LOC609140	-7.72	-7.56	1.02116	0.0302146	0.00666593
LOC609275	-7.54	-7.33	1.02865	0.0407513	0.00899
LOC609321	-7.79	-7.58	1.0277	0.0394255	0.00869758
LOC609323	-7.71	-7.53	1.0239	0.034081	0.00751878
LOC609347	-7.66	-7.51	1.01997	0.0285315	0.00629465
LOC609367	-4.6	-4.46	1.03139	0.0445902	0.00983661
LOC609482	-7.47	-7.29	1.02469	0.0351894	0.00776327
LOC609553	-7.72	-7.57	1.01982	0.0283075	0.00624525
LOC609736	-7.54	-7.36	1.02446	0.0348588	0.00769033
LOC609744	8.04	8.03	1.00125	0.00179551	0.000396154
LOC609748	-7.63	-7.45	1.02416	0.0344426	0.00759855
LOC609788	-7.81	-7.63	1.02359	0.0336395	0.0074214
LOC609921	3.61	3.6	1.00278	0.00400193	0.000882967
LOC609927	-7.89	-7.66	1.03003	0.0426809	0.00941555
LOC609966	-7.89	-7.65	1.03137	0.0445656	0.00983118
LOC609981	-7.7	-7.52	1.02394	0.0341258	0.00752866
LOC610018	-7.9	-7.66	1.03133	0.0445083	0.00981855
LOC610022	-7.87	-7.63	1.03145	0.0446806	0.00985655
LOC610071	-7.23	-7.34	0.985014	-0.0217844	0.00480624
LOC610091	-7.91	-7.68	1.02995	0.0425714	0.0093914
LOC610163	-7.57	-7.4	1.02297	0.032768	0.00722917
LOC610217	-7.88	-7.66	1.02872	0.0408512	0.00901203
LOC610266	-7.72	-7.53	1.02523	0.035951	0.00793125
LOC610298	-7.65	-7.48	1.02273	0.0324215	0.00715273
LOC610482	-7.66	-7.48	1.02406	0.0343061	0.00756844
LOC610513	-7.81	-7.58	1.03034	0.0431247	0.00951343
LOC610514	-3.83	-3.88	0.987113	-0.0187123	0.00412848
LOC610532	-7.65	-7.48	1.02273	0.0324215	0.00715273
LOC610537	6.61	6.72	0.983631	-0.023811	0.00525331
LOC610561	-7.81	-7.59	1.02899	0.0412227	0.00909395
LOC610613	-3.87	-3.97	0.974811	-0.0368054	0.00811971
LOC610631	-2.72	-2.67	1.01873	0.0267669	0.00590539
LOC610677	-4.13	-4.23	0.976359	-0.0345159	0.00761471
LOC610726	-2.79	-2.82	0.989362	-0.01543	0.00340435
LOC610737	-7.78	-7.57	1.02774	0.0394769	0.00870891
LOC610780	-7.73	-7.56	1.02249	0.0320822	0.00707789
LOC610871	-5.66	-5.81	0.974182	-0.0377361	0.00832498
LOC610901	-7.6	-7.43	1.02288	0.0326372	0.00720032
LOC610931	-7.55	-7.36	1.02582	0.0367709	0.00811209
LOC610944	-7.81	-7.61	1.02628	0.0374261	0.0082566
LOC610972	-7.83	-7.63	1.02621	0.0373293	0.00823524
LOC610976	-7.69	-7.54	1.01989	0.0284191	0.00626985
LOC610997	-6.81	-6.99	0.974249	-0.0376377	0.00830327
LOC611068	-7.81	-7.58	1.03034	0.0431247	0.00951343
LOC611081	-7.58	-7.36	1.02989	0.0424921	0.00937391
LOC611126	-7.82	-7.62	1.02625	0.0373776	0.00824591
LOC611129	-7.71	-7.54	1.02255	0.0321663	0.00709645
LOC611180	-7.88	-7.65	1.03007	0.0427359	0.00942768
LOC611181	-7.54	-7.36	1.02446	0.0348588	0.00769033
LOC611361	-7.76	-7.54	1.02918	0.0414921	0.00915338
LOC611382	-4.31	-4.22	1.02133	0.0304449	0.00671672
LOC611428	-1.6	-1.64	0.97561	-0.0356239	0.0078591
LOC611487	-1.1	-1.09	1.00917	0.0131754	0.00290692
LOC611532	-7.85	-7.61	1.03154	0.0447962	0.00988205
LOC611558	-7.68	-7.49	1.02537	0.0361406	0.00797307
LOC611559	-7.54	-7.39	1.0203	0.0289902	0.00639583
LOC611648	-7.89	-7.66	1.03003	0.0426809	0.00941555
LOC611682	-7.44	-7.59	0.980237	-0.0287973	0.00635328
LOC611685	-7.83	-7.64	1.02487	0.0354397	0.00781847
LOC611707	-7.81	-7.61	1.02628	0.0374261	0.0082566
LOC611721	-4.16	-4.13	1.00726	0.0104417	0.0023038
LOC611727	-6.32	-6.37	0.992151	-0.0113688	0.00250834
LOC611815	-7.62	-7.46	1.02145	0.0306154	0.00675433
LOC611816	-4.48	-4.41	1.01587	0.0227201	0.00501265
LOC611882	-7.64	-7.43	1.02826	0.0402104	0.0088707
LOC611957	-7.4	-7.21	1.02635	0.037526	0.00827864
LOC611968	-7.81	-7.57	1.0317	0.0450292	0.00993344
LOC611988	-4.63	-4.5	1.02889	0.0410872	0.00906407
LOC612107	-7.57	-7.41	1.02159	0.0308198	0.00679942
LOC612108	-7.92	-7.68	1.03125	0.0443941	0.00979338
LOC612196	-7.81	-7.58	1.03034	0.0431247	0.00951343
LOC612233	-7.82	-7.63	1.0249	0.0354855	0.00782859
LOC612234	-7.93	-7.69	1.03121	0.0443373	0.00978084
LOC612238	-7.86	-7.65	1.02745	0.0390696	0.00861908
LOC612269	-7.82	-7.63	1.0249	0.0354855	0.00782859
LOC612293	-7.87	-7.65	1.02876	0.0409039	0.00902364
LOC612297	-3.05	-2.99	1.02007	0.0286638	0.00632383
LOC612325	-2.2	-2.185	1.00686	0.00987024	0.00217771
LOC612484	-7.04	-7.12	0.988764	-0.0163018	0.00359668
LOC612521	-7.61	-7.42	1.02561	0.0364773	0.00804733
LOC612534	-7.43	-7.21	1.03051	0.043363	0.00956597
LOC612544	-7.73	-7.53	1.02656	0.0378185	0.00834316
LOC612576	-5.71	-5.59	1.02147	0.0306425	0.00676031
LOC612657	1.72	1.68	1.02381	0.0339473	0.0074893
LOC612672	-7.48	-7.59	0.985507	-0.0210616	0.00464678
LOC612694	-7.74	-7.55	1.02517	0.0358569	0.0079105
LOC612844	1.86	1.91	0.973822	-0.03827	0.00844274
LOC612872	-3.87	-3.835	1.00913	0.013107	0.00289183
LPIN1	-4.96667	-5.04667	0.984148	-0.0230529	0.00508607
LRFN5	-7.56	-7.39	1.023	0.0328119	0.00723884
LRGUK	-7.53	-7.36	1.0231	0.0329441	0.00726801
LRRC2	-5.66	-5.58	1.01434	0.0205369	0.00453103
LRRC4B	-7.62	-7.49	1.01736	0.0248253	0.00547707
LRRC55	-7.88	-7.65	1.03007	0.0427359	0.00942768
LRRC6	-6.825	-7.03	0.970839	-0.0426956	0.0094188
LRRC67	-7.64	-7.48	1.02139	0.0305344	0.00673647
LRRC8E	-7.77	-7.57	1.02642	0.0376213	0.00829966
LRRK1	-4.8	-4.74	1.01266	0.0181473	0.00400385
LRRN1	-7.395	-7.545	0.980119	-0.0289708	0.00639155
LRRN3	-7.03	-7.18	0.979109	-0.0304592	0.00671987
LRRTM1	-4.5	-4.45	1.01124	0.0161197	0.0035565
LRRTM2	-6.22	-6.06	1.0264	0.0375968	0.00829425
LRRTM4	-7.53	-7.34	1.02589	0.0368698	0.00813391
LTBP1	-1.72667	-1.68	1.02778	0.0395284	0.00872027
LTBP2	-5.60667	-5.43667	1.03127	0.0444209	0.00979929
LTBP4	-2.93	-2.925	1.00171	0.00246404	0.000543655
LY6G5C	-7.6	-7.44	1.02151	0.0306968	0.0067723
LYG2	-6.41	-6.58	0.974164	-0.0377632	0.00833096
LYRM5	-6.57	-6.47	1.01546	0.0221277	0.00488196
LYZL1	-7.69	-7.51	1.02397	0.0341707	0.00753857
MAB21L1	-3.51	-3.53	0.994334	-0.00819715	0.00180857
MACC1	-7.62	-7.46	1.02145	0.0306154	0.00675433
MAEL	-7.52	-7.34	1.02452	0.0349526	0.00771103
MAGEB1	-7.45	-7.22333	1.03138	0.0445757	0.00983342
MAGEB5	-6.32	-6.18	1.02265	0.0323177	0.00712984
MAMDC2	-6.78	-6.8	0.997059	-0.00424947	0.000937584
MAN1A1	4.63	4.53	1.02208	0.0315011	0.00694972
MAN1C1	-1.96	-1.97	0.994924	-0.00734197	0.00161989
MAOA	4.23	4.185	1.01075	0.01543	0.00340435
MAOB	2.515	2.475	1.01616	0.0231299	0.00510306
MAP2	-5.74	-5.69	1.00879	0.0126221	0.00278485
MAP3K14	-5.6	-5.57	1.00539	0.0077495	0.00170981
MAP6	-4.97	-4.85	1.02474	0.0352611	0.00777908
MAP7D3	-3.26	-3.28	0.993902	-0.00882385	0.00194684
MAPK12	-7.59	-7.41	1.02429	0.0346263	0.00763907
43162	-1.63667	-1.61	1.01656	0.0236998	0.00522879
43164	-1.33	-1.35	0.985185	-0.0215332	0.00475081
MB	-5.16333	-5.01333	1.02992	0.0425326	0.00938284
MC3R	-7.51	-7.67	0.97914	-0.0304137	0.00670984
MCFD2	5.14	5.06	1.01581	0.022631	0.00499299
MCHR1	-7.81	-7.63	1.02359	0.0336395	0.0074214
MCHR2	-7.82	-7.58	1.03166	0.0449708	0.00992054
MCOLN3	-7.87	-7.66	1.02742	0.0390192	0.00860798
MDH1B	-7.57	-7.38	1.02575	0.0366725	0.00809038
MEA1	4.11	4.05	1.01481	0.0212165	0.00468094
MED23	-1.195	-1.185	1.00844	0.0121236	0.00267486
MED24	-2.13	-2.16	0.986111	-0.0201779	0.00445181
MED26	-5.02	-5.09	0.986248	-0.0199783	0.00440778
MEF2A	-2.74333	-2.66667	1.02875	0.0408924	0.00902112
MEOX2	-4	-4.05	0.987654	-0.0179219	0.00395411
MEPE	-7.92	-7.68	1.03125	0.0443941	0.00979338
MET	-3.56	-3.525	1.00993	0.014254	0.00314489
METTL2B	-2.325	-2.3	1.01087	0.0155969	0.00344115
MFAP5	-7.87	-7.65	1.02876	0.0409039	0.00902364
MFSD7	-5.2	-5.09	1.02161	0.030846	0.0068052
MGAT4C	-7.69667	-7.51333	1.0244	0.0347807	0.00767311
MLNR	-7.53	-7.35	1.02449	0.0349056	0.00770067
MMP20	-7.82	-7.58	1.03166	0.0449708	0.00992054
MMP26	-7.7	-7.51	1.0253	0.0360455	0.0079521
MMP27	-7.76	-7.58	1.02375	0.0338588	0.00746977
MMP28	-1.095	-1.11	0.986486	-0.0196288	0.00433068
MOBP	-7.6	-7.4	1.02703	0.0384741	0.00848776
MOCS2	4.46	4.39	1.01595	0.0228228	0.00503531
MOGS	-1.575	-1.535	1.02606	0.0371132	0.00818758
MPL	-7.85	-7.62	1.03018	0.0429017	0.00946424
MPPED2	-5.38	-5.285	1.01798	0.0257027	0.00567063
MRAP	-7.84	-7.6	1.03158	0.0448542	0.00989485
MRPL54	-4.27	-4.29	0.995338	-0.00674158	0.00148743
MRS2	-3.27	-3.28	0.996951	-0.00440518	0.000971938
MS4A5	-7.56	-7.42	1.01887	0.026967	0.00594954
MS4A6A	-7.67	-7.5	1.02267	0.032336	0.00713387
MS4A7	-1.46	-1.44	1.01389	0.0198996	0.00439041
MSH4	-7.71	-7.52	1.02527	0.0359982	0.00794166
MSI1	-7.81	-7.61	1.02628	0.0374261	0.0082566
MSI2	-4.68333	-4.63333	1.01079	0.0154852	0.00341653
MSRA	1.55	1.51	1.02649	0.0377197	0.00832135
MSTN	-7.53	-7.33	1.02729	0.0388367	0.00856772
MTF2	-1.19	-1.18	1.00847	0.0121747	0.00268614
MTL5	-7.53	-7.36	1.0231	0.0329441	0.00726801
MTMR14	-0.96	-0.97	0.989691	-0.0149503	0.00329852
MTRF1L	-7.42	-7.22	1.0277	0.0394203	0.00869645
MUC6	-7.78	-7.62	1.021	0.0299792	0.00661399
MURC	-7.93	-7.69	1.03121	0.0443373	0.00978084
MVP	0.59	0.606667	0.972527	-0.0401891	0.008866
MYBL1	-4.98	-4.91	1.01426	0.0204227	0.00450583
MYBPC1	-6.69167	-6.74	0.992829	-0.010383	0.00229084
MYBPHL	-7.67	-7.47	1.02677	0.0381183	0.00840928
MYF5	-7.87	-7.63	1.03145	0.0446806	0.00985655
MYH2	-7.084	-7.222	0.980892	-0.0278342	0.00614084
MYL10	-7.39	-7.17	1.03068	0.0436012	0.00961852
MYL2	-6.414	-6.452	0.99411	-0.00852209	0.00188026
MYLK4	-7.74	-7.56	1.02381	0.0339473	0.0074893
MYO18B	-5.19333	-5.16333	1.00581	0.00835809	0.00184408
MYO5C	-3.44	-3.34	1.02994	0.0425605	0.00938899
MYOM3	-7.6	-7.41	1.02564	0.0365259	0.00805805
MYOT	-6.79	-6.77	1.00295	0.00425574	0.000938967
N4BP2	2.23	2.17	1.02765	0.0393487	0.00868064
NAA40	-3.71333	-3.82667	0.970383	-0.0433734	0.00956828
NANOG	-7.85	-7.62	1.03018	0.0429017	0.00946424
NCK2	-4.89	-4.76	1.02731	0.0388729	0.00857571
NCOA1	1.285	1.295	0.992278	-0.0111837	0.00246751
NDST4	-7.71	-7.53	1.0239	0.034081	0.00751878
NDUFB7	5.99	5.83	1.02744	0.0390601	0.008617
NDUFS5	6.58	6.46	1.01858	0.0265534	0.0058583
NELF	-3.645	-3.76	0.969415	-0.0448138	0.00988594
NELL1	-5.945	-5.86	1.01451	0.0207761	0.0045838
NFATC2	-4.09	-4.1	0.997561	-0.00352307	0.000777313
NFE2L1	-2.105	-2.125	0.990588	-0.0136426	0.00301
NGB	-5.8	-5.91	0.981387	-0.0271052	0.00598003
NIF3L1	2.705	2.68	1.00933	0.0133956	0.0029555
NINJ2	-2.51	-2.48	1.0121	0.0173472	0.00382733
NIPA2	1.35667	1.33667	1.01496	0.0214266	0.00472729
NIPAL3	-2.06	-2.04	1.0098	0.0140752	0.00310544
NKAIN4	-6.3	-6.38	0.987461	-0.0182046	0.00401648
NKD1	-7.61	-7.44	1.02285	0.0325938	0.00719075
NKIRAS2	-5.11	-4.995	1.02302	0.0328386	0.00724474
NLGN2	-7.81	-7.57	1.0317	0.0450292	0.00993344
NLGN3	-7.51	-7.33	1.02456	0.0349997	0.00772142
NLRP10	-7.5	-7.29	1.02881	0.0409718	0.00903862
NLRP9	-7.66	-7.48	1.02406	0.0343061	0.00756844
NMS	-7.13333	-6.96667	1.02392	0.0341079	0.00752471
NODAL	-5.69	-5.53	1.02893	0.0411492	0.00907774
NOMO2	5.33	5.24	1.01718	0.0245687	0.00542047
NOS2	-5.26	-5.36	0.981343	-0.0271702	0.00599436
NOTUM	-5.77	-5.86	0.984642	-0.0223293	0.00492645
NOXO1	-4.01	-4.02	0.997512	-0.00359327	0.000792801
NPAS4	-7.59	-7.43	1.02153	0.0307377	0.00678131
NPAT	-2.04	-2.02	1.0099	0.0142139	0.00313603
NPHS2	-7.53	-7.36	1.0231	0.0329441	0.00726801
NPPC	-3.44	-3.34	1.02994	0.0425605	0.00938899
NPSR1	-7.56	-7.37	1.02578	0.0367216	0.00810122
NPTX2	-4.49	-4.61	0.97397	-0.0380513	0.0083945
NQO1	-2.195	-2.135	1.0281	0.0399849	0.00882096
NR2E1	-7.48	-7.29	1.02606	0.0371195	0.00818897
NRBP2	-3.1	-3.05	1.01639	0.023459	0.00517566
NRG3	-7.41	-7.495	0.988659	-0.0164549	0.00363047
NSL1	-4.855	-4.865	0.997945	-0.00296851	0.000654958
NTAN1	-2.21	-2.27	0.973568	-0.0386459	0.00852565
NTN3	-7.55	-7.35	1.02721	0.0387324	0.00854472
NTRK1	-7.76	-7.58	1.02375	0.0338588	0.00746977
NUPL2	-3.54	-3.63	0.975207	-0.0362202	0.00799062
OAZ1	5.845	5.85	0.999145	-0.0012336	0.000272176
ODAM	-7.57	-7.38	1.02575	0.0366725	0.00809038
ODF1	-7.83	-7.63	1.02621	0.0373293	0.00823524
ODF2	-4.35333	-4.26	1.02191	0.0312671	0.00689809
ODZ1	-7.85	-7.61	1.03154	0.0447962	0.00988205
OLFM1	-5.04	-5.05	0.99802	-0.00285965	0.000630941
OMD	-5.81	-5.7	1.0193	0.0275762	0.00608393
OPALIN	-7.77	-7.575	1.02574	0.0366687	0.00808955
OPN5	-7.47	-7.31	1.02189	0.0312368	0.00689142
OPRL1	-6.33	-6.41	0.98752	-0.0181189	0.00399756
OPTC	-6.77	-6.815	0.993397	-0.00955782	0.00210878
OR01C09	-5.325	-5.21	1.02207	0.0314982	0.00694906
OR04E07	-7.82	-7.63	1.0249	0.0354855	0.00782859
OR08C09	-7.76	-7.58	1.02375	0.0338588	0.00746977
OR08D06	-7.63	-7.46	1.02279	0.0325074	0.00717169
OR08H06	-7.63	-7.45	1.02416	0.0344426	0.00759855
OR08H09	-7.33	-7.52	0.974734	-0.0369195	0.00814486
OR10F05	-7.6	-7.42	1.02426	0.0345802	0.0076289
OR10G10	-7.64	-7.48	1.02139	0.0305344	0.00673647
OR12E11	-7.51	-7.32	1.02596	0.0369693	0.00815584
OR16B12	-7.76	-7.57	1.0251	0.0357634	0.00788986
OR18C09	-7.79	-7.57	1.02906	0.04133	0.00911763
OR26A01	-7.86	-7.66	1.02611	0.0371849	0.00820341
OR28D07	-7.57	-7.38	1.02575	0.0366725	0.00809038
OR2C1	-7.7	-7.54	1.02122	0.0302939	0.00668343
OR4A15	-7.74	-7.58	1.02111	0.0301357	0.00664853
OR4C12	-7.73	-7.55	1.02384	0.0339918	0.0074991
OR4D5	-5.81	-5.64	1.03014	0.042843	0.0094513
OR51M1	-7.64	-7.47	1.02276	0.0324644	0.0071622
OR52E6	-7.73	-7.62	1.01444	0.0206774	0.00456202
OR5J2	-7.81	-7.58	1.03034	0.0431247	0.00951343
OR5M3	-7.65	-7.47	1.0241	0.0343515	0.00757845
OR5T1	-7.4	-7.2	1.02778	0.0395284	0.00872027
OR6M1	-7.65	-7.49	1.02136	0.030494	0.00672757
OR8B4	-7.64	-7.47	1.02276	0.0324644	0.0071622
OR8D2	-7.64	-7.48	1.02139	0.0305344	0.00673647
OR8K3	-7.69	-7.5	1.02533	0.036093	0.00796257
OR8U1	-7.62	-7.45	1.02282	0.0325506	0.00718121
OTOA	-7.55	-7.39	1.02165	0.0309023	0.00681762
OTUD6A	-7.76	-7.59	1.0224	0.0319568	0.00705022
OTX2	-7.41	-7.19	1.0306	0.0434818	0.00959217
OVCH2	-7.8	-7.61	1.02497	0.0355777	0.00784891
OXER1	-5.21	-5.17	1.00774	0.0111191	0.00245324
P2RX5	-4.365	-4.285	1.01867	0.0266865	0.00588765
PACS1	-6.33	-6.135	1.03178	0.0451422	0.00995834
PANX3	-7.41	-7.49	0.989319	-0.0154922	0.00341806
PAQR3	-4.13	-4.1	1.00732	0.0105179	0.0023206
PASD1	-7.36	-7.59	0.969697	-0.0443941	0.00979338
PAX9	-6.29	-6.33	0.993681	-0.00914548	0.00201781
PCDH19	-7.82	-7.64	1.02356	0.033596	0.0074118
PCDH9	-7.475	-7.37	1.01425	0.020409	0.00450279
PCDHA1	-4.69	-4.56	1.02851	0.0405541	0.0089465
PCDHA13	-7.4	-7.2	1.02778	0.0395284	0.00872027
PCDHA5	-7.58	-7.42	1.02156	0.0307787	0.00679035
PCDHA6	-7.44	-7.26	1.02479	0.0353331	0.00779495
PCDHB3	-6.76	-6.57	1.02892	0.0411299	0.00907349
PCDHGA3	-7.35	-7.18	1.02368	0.0337604	0.00744807
PCGF1	4.91	4.94	0.993927	-0.00878802	0.00193894
PCGF3	-2.17	-2.21	0.9819	-0.0263513	0.00581372
PCNT	-7.41	-7.23	1.0249	0.0354779	0.0078269
PCNXL2	-6.72	-6.55	1.02595	0.0369663	0.0081552
PCSK1	-5.16	-5.13	1.00585	0.00841224	0.00185603
PCYT1B	-7.79	-7.55	1.03179	0.0451467	0.00995934
PDCL	-2.36	-2.29	1.03057	0.0434393	0.0095828
PDCL2	-7.62	-7.43	1.02557	0.0364288	0.00803663
PDE4DIP	-4.74375	-4.7375	1.00132	0.00190204	0.000419657
PDE6G	2.42	2.4	1.00833	0.0119726	0.00264156
PDE7B	-7.51	-7.32	1.02596	0.0369693	0.00815584
PDE8A	-3.2	-3.15	1.01587	0.0227201	0.00501265
PDILT	-7.8	-7.61	1.02497	0.0355777	0.00784891
PDLIM1	4.54	4.5025	1.00833	0.011966	0.0026401
PDP1	-4.7	-4.61	1.01952	0.027894	0.00615403
PDYN	-7.66	-7.5	1.02133	0.0304538	0.00671869
PDZD2	-7.89	-7.67	1.02868	0.0407987	0.00900045
PEF1	-4.09	-3.99	1.02506	0.0357121	0.00787856
PEX7	1.31	1.35	0.97037	-0.0433926	0.00957251
PFKP	3.39	3.41	0.994135	-0.00848647	0.00187241
PFN4	-7.48	-7.33	1.02046	0.0292251	0.00644765
PGGT1B	-4.39	-4.45	0.986517	-0.0195844	0.00432088
PGK2	-7.65	-7.49	1.02136	0.030494	0.00672757
PGM2L1	-3.54	-3.48	1.01724	0.0246621	0.00544106
PGRMC1	3.625	3.515	1.03129	0.0444563	0.00980709
PHOSPHO1	-4.2	-4.18	1.00478	0.00688639	0.00151938
PHOX2B	-5.54	-5.63	0.984014	-0.0232489	0.00512932
PI15	-7.88	-7.65	1.03007	0.0427359	0.00942768
PI3	-1.54	-1.575	0.977778	-0.0324215	0.00715273
PIAS4	-4.51	-4.41	1.02268	0.0323488	0.00713669
PIH1D1	1.98	2.02	0.980198	-0.0288549	0.00636599
PIM2	-4.99	-4.85	1.02887	0.0410551	0.00905699
PITX1	-3.42	-3.34	1.02395	0.0341482	0.00753361
PIWIL2	-7.34	-7.57	0.969617	-0.0445132	0.00981965
PKD2L1	-7.7	-7.51	1.0253	0.0360455	0.0079521
PKDREJ	-6.42	-6.275	1.02311	0.0329578	0.00727104
PKP1	-4.73	-4.71	1.00425	0.00611312	0.00134877
PLA2G4D	-7.78	-7.55	1.03046	0.0432935	0.00955066
PLCXD1	-5.21	-5.1	1.02157	0.0307861	0.006792
PLD5	-7.56	-7.39	1.023	0.0328119	0.00723884
PLD6	-7.59	-7.44	1.02016	0.0287973	0.00635328
PLIN4	-6.3	-6.27	1.00478	0.00688639	0.00151938
PLN	-6.05667	-5.95333	1.01736	0.0248263	0.0054773
PLSCR3	-3.47	-3.37	1.02967	0.0421871	0.00930664
PMCH	-7.76	-7.58	1.02375	0.0338588	0.00746977
PMF1	-5.5	-5.58	0.985663	-0.0208335	0.00459645
PNPLA1	-7.91	-7.68	1.02995	0.0425714	0.0093914
PNPLA5	-7.83	-7.64	1.02487	0.0354397	0.00781847
PODXL2	-7.12	-6.96	1.02299	0.0327899	0.007234
POMC	-3.7	-3.76	0.984043	-0.0232074	0.00512016
PON1	-7.87	-7.66	1.02742	0.0390192	0.00860798
POU2F3	-7.83	-7.61	1.02891	0.0411159	0.00907039
POU4F2	-7.7	-7.52	1.02394	0.0341258	0.00752866
PPAT	-3.13	-3.09	1.01294	0.0185558	0.00409396
PPP1R14C	-7.11	-7.25667	0.979789	-0.0294574	0.00649891
PPP1R2	-2.95	-2.86	1.03147	0.0446998	0.00986079
PPP1R3A	-7.73	-7.54	1.0252	0.0359039	0.00792086
PPP1R3C	-7.59	-7.38	1.02846	0.0404791	0.00892995
PPP2R2C	-7.82	-7.63	1.0249	0.0354855	0.00782859
PPP4C	3.065	3.04	1.00822	0.0118157	0.00260695
PPP4R4	-7.63	-7.48	1.02005	0.0286448	0.00631964
PPPDE1	-3.32	-3.33	0.996997	-0.00433894	0.000957322
PRAME	-6.71	-6.80333	0.986281	-0.019929	0.00439691
PRCC	-2.71	-2.67	1.01498	0.0214531	0.00473315
PRCD	-5.3775	-5.265	1.02137	0.0305021	0.00672935
PRELID2	1.71	1.72	0.994186	-0.00841224	0.00185603
PREPL	-3.38	-3.35	1.00896	0.0128622	0.00283781
PRKAR1A	-3.31	-3.41	0.970674	-0.0429405	0.00947281
PRKCB	-3.07333	-3.06333	1.00326	0.00470189	0.0010374
PRMT3	-1.43667	-1.41333	1.01651	0.0236236	0.00521198
PRMT8	-7.8	-7.57	1.03038	0.0431808	0.0095258
PROC	-4.66	-4.57	1.01969	0.0281358	0.00620736
PROCA1	-5.68	-5.51	1.03085	0.0438386	0.00967087
PROX1	-4.27	-4.16	1.02644	0.0376525	0.00830655
PRPF40A	1.5825	1.5725	1.00636	0.00914548	0.00201781
PRPH2	-6.265	-6.35	0.986614	-0.0194421	0.00428949
PRR22	-5.57	-5.56	1.0018	0.00259245	0.000571985
PRR5L	-7.66	-7.51	1.01997	0.0285315	0.00629465
PRRG1	-7.6	-7.44	1.02151	0.0306968	0.0067723
PRSS37	-7.88	-7.64	1.03141	0.044623	0.00984385
PRSS38	-7.46	-7.28	1.02473	0.0352372	0.0077738
PRUNE	-2.81	-2.76	1.01812	0.0259019	0.00571457
PSKH2	-7.77	-7.59	1.02372	0.0338147	0.00746005
PSMB11	-7.75	-7.59	1.02108	0.0300964	0.00663986
PSMD4	3.86	3.75	1.02933	0.0417103	0.00920148
PSME2	5.68	5.795	0.980155	-0.0289177	0.00637985
PTCH2	-7.67	-7.51	1.0213	0.0304137	0.00670984
PTGIS	-5.05	-4.98	1.01406	0.0201376	0.00444294
PTGR1	3.05	3.09	0.987055	-0.0187976	0.0041473
PTH	-7.65	-7.49	1.02136	0.030494	0.00672757
PTK7	-3.77	-3.8	0.992105	-0.0114349	0.00252292
PTPDC1	-4.64	-4.63	1.00216	0.00311261	0.000686752
PTPRO	-7.73	-7.55	1.02384	0.0339918	0.0074991
PTPRU	-7.78	-7.57	1.02774	0.0394769	0.00870891
PURA	1.935	1.89	1.02381	0.0339473	0.0074893
PVRL1	-4.54	-4.605	0.985885	-0.0205089	0.00452483
PVRL4	-7.79	-7.56	1.03042	0.0432371	0.00953821
PXDNL	-7.63	-7.6	1.00395	0.00568364	0.00125401
QRFPR	-7.79	-7.59	1.02635	0.0375234	0.00827807
R3HDM2	-2.065	-2.02	1.02228	0.0317865	0.00701266
RAB10	0.356667	0.366667	0.972727	-0.0398927	0.00880063
RAB11A	3.475	3.41	1.01906	0.0272412	0.00601003
RAB23	-0.83	-0.84	0.988095	-0.017278	0.00381205
RAB3A	-7.53	-7.34	1.02589	0.0368698	0.00813391
RAB3C	-7.81	-7.57	1.0317	0.0450292	0.00993344
RAB6B	-7.81	-7.63	1.02359	0.0336395	0.0074214
RABIF	-4.225	-4.25	0.994118	-0.0085115	0.00187793
RABL3	-1.91	-1.9	1.00526	0.00757322	0.00167091
RAD17	-1.1	-1.12	0.982143	-0.0259952	0.00573516
RAD50	1.905	1.875	1.016	0.0229004	0.00505243
RAD9B	-7.4	-7.2	1.02778	0.0395284	0.00872027
RADIL	-4.89	-4.87	1.00411	0.00591269	0.00130455
RANBP6	-4.31	-4.42	0.975113	-0.0363585	0.00802113
RAP2C	-3.11	-3.04	1.02303	0.0328433	0.00724577
RASD1	-4.3	-4.36	0.986239	-0.0199915	0.00441069
RASL11B	-2.68	-2.75	0.974545	-0.0371986	0.00820643
RAX2	-7.55	-7.68	0.983073	-0.0246297	0.00543392
RBM22	2.67	2.7	0.988889	-0.0161197	0.0035565
RBM45	-2.005	-2.035	0.985258	-0.0214266	0.00472729
RCOR2	-7.59	-7.7	0.985714	-0.0207586	0.00457992
RERGL	-7.35	-7.3	1.00685	0.00984779	0.00217276
RFFL	-5.42	-5.4	1.0037	0.00533344	0.00117675
RFWD3	-7.8	-7.63	1.02228	0.0317911	0.00701367
RFX4	-6.32	-6.135	1.03015	0.0428612	0.00945532
RFX7	-2.76	-2.775	0.994595	-0.0078195	0.00172525
RGS12	-3.455	-3.4425	1.00363	0.00522906	0.00115371
RGS22	-4.69	-4.75	0.987368	-0.0183396	0.00404626
RGS9	-4.23	-4.15	1.01928	0.0275463	0.00607733
RHCG	-6.47	-6.35	1.0189	0.0270091	0.00595883
RHO	-6.395	-6.315	1.01267	0.0181616	0.004007
RHOJ	-6.24	-6.29	0.992051	-0.011514	0.00254037
RIBC1	-3.20667	-3.19333	1.00418	0.00601124	0.00132629
RIBC2	-7.94	-7.7	1.03117	0.0442806	0.00976833
RIC3	-7.73	-7.54	1.0252	0.0359039	0.00792086
RLN	-2.69667	-2.72	0.991422	-0.0124294	0.00274235
RNASE10	-7.81	-7.59	1.02899	0.0412227	0.00909395
RNASEK	2.31	2.375	0.972632	-0.0400347	0.00883194
RNF168	-1.58	-1.57	1.00637	0.00916	0.00202101
RNF181	2.27	2.33	0.974249	-0.0376377	0.00830327
RNF182	-7.54	-7.36	1.02446	0.0348588	0.00769033
RNF25	-1.825	-1.795	1.01671	0.0239126	0.00527573
RNF43	-3.02	-2.93	1.03072	0.0436479	0.00962881
RP1	-7.69	-7.51	1.02397	0.0341707	0.00753857
RPA1	-3.125	-3.04	1.02796	0.0397849	0.00877685
RPL6P	-7.76	-7.53	1.03054	0.0434068	0.00957564
RPLP1	5.3075	5.2225	1.01628	0.0232919	0.00513879
RPS6KA6	-7.61	-7.46	1.02011	0.0287208	0.00633642
RRAGB	-5.77	-5.7	1.01228	0.0176094	0.00388516
RRAS	3.335	3.26	1.02301	0.0328148	0.00723949
RSBN1	0.325	0.33	0.984848	-0.0220263	0.0048596
RSPH1	-7.85	-7.64	1.02749	0.03912	0.00863021
RSPH4A	-7.83	-7.6	1.03026	0.0430129	0.00948877
RSPO1	-7.79	-7.6	1.025	0.0356239	0.0078591
RSPO3	-5.74	-5.78	0.99308	-0.0100188	0.00221048
RTDR1	-7.13	-7.33	0.972715	-0.0399111	0.00880469
RTEL1	-2.06	-2.04	1.0098	0.0140752	0.00310544
RTP1	-7.8	-7.59	1.02767	0.0393742	0.00868628
RUFY1	-4.865	-4.96	0.980847	-0.0279003	0.00615542
RXFP2	-7.53	-7.38	1.02033	0.029029	0.00640441
S100A10	5.55	5.63	0.98579	-0.0206472	0.00455534
S1PR2	-3.94	-3.9	1.01026	0.0147215	0.00324803
SAAL1	-2.005	-2.05	0.978049	-0.0320217	0.00706454
SAMD3	-7.54	-7.4	1.01892	0.0270393	0.00596547
SAMD7	-7.54	-7.32	1.03005	0.0427209	0.00942437
SARS2	-3.03	-3.05	0.993443	-0.00949145	0.00209414
SASS6	-7.57	-7.4	1.02297	0.032768	0.00722917
SCAMPER	-7.86	-7.66	1.02611	0.0371849	0.00820341
SCLT1	-3.67	-3.75	0.978667	-0.0311105	0.00686356
SCN1B	-1.545	-1.525	1.01311	0.0187976	0.0041473
SCN9A	-6.94	-7.04	0.985795	-0.0206398	0.00455371
SCUBE2	-6.465	-6.455	1.00155	0.00223327	0.00049274
SDC3	-7.08	-6.96	1.01724	0.0246621	0.00544106
SDR9C7	-7.25	-7.33	0.989086	-0.0158322	0.00349308
SEC14L4	-7.65	-7.48	1.02273	0.0324215	0.00715273
43357	-7.78	-7.58	1.02639	0.0375723	0.00828885
43346	-7.63	-7.47	1.02142	0.0305748	0.00674539
SEPW1	6.545	6.56	0.997713	-0.00330262	0.000728675
SERPINA6	-6.59	-6.74	0.977745	-0.0324701	0.00716346
SERPINA7	-7.84	-7.605	1.0309	0.0439054	0.0096856
SERPINB10	-7.82	-7.58	1.03166	0.0449708	0.00992054
SERPINB11	-7.81	-7.61	1.02628	0.0374261	0.0082566
SERPINB7	-7.74	-7.53	1.02789	0.0396837	0.00875453
SEZ6	-7.7	-7.53	1.02258	0.0322086	0.00710577
SFRP2	-7.61	-7.45	1.02148	0.030656	0.0067633
SFSWAP	1.3	1.265	1.02767	0.0393742	0.00868628
SFTPD	6.52	6.64	0.981928	-0.0263113	0.00580488
SFXN5	-6.34	-6.42	0.987539	-0.0180905	0.00399129
SGCB	-3.22	-3.29667	0.976744	-0.0339473	0.0074893
SGCG	-7.56	-7.47	1.01205	0.017278	0.00381205
SGSM1	-7.565	-7.51	1.00732	0.0105272	0.00232265
SH3RF2	-3.12	-3.115	1.00161	0.00231387	0.000510521
SHMT1	-2.08	-2.13	0.976526	-0.0342699	0.00756045
SIRPB1	-5.92	-6.065	0.976092	-0.0349105	0.00770174
SIRPB2	-7.64	-7.46	1.02413	0.034397	0.00758849
SIT1	-3.41	-3.32	1.02711	0.0385885	0.00851298
SKP2	-4.1	-4.02	1.0199	0.0284284	0.00627191
SLC16A12	-7.58	-7.43	1.02019	0.0288356	0.00636174
SLC16A2	-7.52	-7.34	1.02452	0.0349526	0.00771103
SLC17A3	-7.92	-7.68	1.03125	0.0443941	0.00979338
SLC22A1	-7.02667	-7	1.00381	0.00548554	0.0012103
SLC22A2	-7.85	-7.64	1.02749	0.03912	0.00863021
SLC25A25	-4.8	-4.67	1.02784	0.0396119	0.00873869
SLC25A29	-3.62	-3.63	0.997245	-0.00397985	0.000878096
SLC25A3	5.45833	5.57333	0.979366	-0.0300799	0.00663622
SLC25A41	-7.82	-7.63	1.0249	0.0354855	0.00782859
SLC25A44	-3.28	-3.24	1.01235	0.017702	0.00390559
SLC26A7	-7.89	-7.65	1.03137	0.0445656	0.00983118
SLC26A9	-7.88	-7.66	1.02872	0.0408512	0.00901203
SLC27A3	-1.01	-0.99	1.0202	0.0288549	0.00636599
SLC2A11	-7.54	-7.31	1.03146	0.0446931	0.00985932
SLC2A12	-7.7	-7.49	1.02804	0.0398927	0.00880063
SLC30A9	-2.72	-2.69	1.01115	0.0160005	0.0035302
SLC35B1	3.42	3.51	0.974359	-0.0374747	0.00826732
SLC35C1	-2.98	-2.91	1.02405	0.0342932	0.00756558
SLC35D3	-6.26	-6.3	0.993651	-0.00918917	0.00202744
SLC38A2	2.03	2.065	0.983051	-0.0246621	0.00544106
SLC38A4	-7.89	-7.67	1.02868	0.0407987	0.00900045
SLC41A1	-7.74	-7.56	1.02381	0.0339473	0.0074893
SLC48A1	-3.88	-3.92	0.989796	-0.014797	0.00326469
SLC4A1	-7.89	-7.68	1.02734	0.038919	0.00858587
SLC5A5	-6.17	-6.1	1.01148	0.0164612	0.00363186
SLC6A15	-7.82	-7.63	1.0249	0.0354855	0.00782859
SLC6A3	-5.17	-5.02	1.02988	0.0424769	0.00937057
SLC9A11	-7.76	-7.56	1.02646	0.0376704	0.00831049
SLC9A7	-6.53	-6.62	0.986405	-0.0197482	0.00435703
SLURP1	-0.92	-0.91	1.01099	0.0157673	0.00347876
SMAD6	1.91	1.9	1.00526	0.00757322	0.00167091
SMARCA2	-0.9	-0.91	0.989011	-0.0159415	0.0035172
SMARCAL1	-2.62	-2.67	0.981273	-0.0272729	0.00601702
SMARCC1	-3.39	-3.36	1.00893	0.012824	0.0028294
SMCP	-7.27	-7.095	1.02467	0.0351527	0.00775517
SMPD1	-2	-2.03	0.985222	-0.0214797	0.00473902
SMUG1	-4.36	-4.43	0.984199	-0.0229786	0.00506967
SNAI1	-4.87	-4.78	1.01883	0.0269112	0.00593721
SNTG2	-5.95	-6.09	0.977011	-0.0335526	0.00740222
SNX12	-0.97	-0.96	1.01042	0.0149503	0.00329852
SNX20	-6.4	-6.43	0.995334	-0.00674683	0.00148859
SNX21	-3.01	-2.97	1.01347	0.0193006	0.00425826
SNX31	-4.98	-5.03	0.99006	-0.0144127	0.00317989
SOBP	-7.77	-7.56	1.02778	0.0395284	0.00872027
SOHLH2	-7.74	-7.53	1.02789	0.0396837	0.00875453
SORT1	1.12	1.155	0.969697	-0.0443941	0.00979338
SOX30	-7.46	-7.245	1.02968	0.0421899	0.00930728
SPACA3	-7.58	-7.42	1.02156	0.0307787	0.00679035
SPAG17	-7.86	-7.66	1.02611	0.0371849	0.00820341
SPAG6	-7.64333	-7.45333	1.02549	0.0363162	0.00801179
SPAG7	5.49	5.45	1.00734	0.0105499	0.00232767
SPATA2	-3.66	-3.67	0.997275	-0.00393642	0.000868512
SPATA22	-7.47	-7.3	1.02329	0.0332118	0.00732705
SPATA4	-7.81	-7.62	1.02493	0.0355316	0.00783873
SPCS2	-3.11	-3.14	0.990446	-0.01385	0.00305575
SPECC1L	-6.12	-5.99	1.0217	0.0309757	0.00683381
SPEF2	-7.5	-7.31	1.02599	0.0370192	0.00816685
SPEG	-2.425	-2.375	1.02105	0.0300572	0.00663122
SPEM1	-7.41	-7.63	0.971166	-0.0422095	0.00931159
SPRY4	-5.89	-5.84	1.00856	0.0122993	0.00271362
SPRYD3	-3.42	-3.45	0.991304	-0.0126	0.00277998
SPTBN4	-7.55	-7.37	1.02442	0.034812	0.00768003
SPZ1	-7.66	-7.51	1.01997	0.0285315	0.00629465
SRA1	2.265	2.305	0.982646	-0.0252557	0.00557202
ST3GAL3	-7.84	-7.65	1.02484	0.0353939	0.00780837
ST6GALNAC5	-7.92	-7.69	1.02991	0.0425168	0.00937937
ST8SIA3	-7.74	-7.54	1.02653	0.037769	0.00833224
ST8SIA6	-7.61	-7.42	1.02561	0.0364773	0.00804733
STAC	-7.76	-7.57	1.0251	0.0357634	0.00788986
STARD4	-1.59	-1.57	1.01274	0.0182622	0.00402919
STC2	-7.56	-7.38	1.02439	0.0347654	0.00766975
STEAP4	-7.74	-7.52	1.02926	0.0416009	0.00917737
STK31	-7.905	-7.67	1.03064	0.0435389	0.00960477
STK32B	-7.53	-7.35	1.02449	0.0349056	0.00770067
STOX1	-5.73	-5.78	0.991349	-0.0125344	0.00276549
STS	-7.75	-7.55	1.02649	0.0377197	0.00832135
STXBP2	1.75	1.76	0.994318	-0.00822051	0.00181373
STXBP4	-4.56	-4.47	1.02013	0.028759	0.00634484
SUCLG1	6.365	6.27	1.01515	0.0216951	0.00478652
SULT6B1	-7.86	-7.65	1.02745	0.0390696	0.00861908
SV2A	-7.42	-7.24	1.02486	0.0354295	0.00781622
SV2B	-7.52	-7.35	1.02313	0.0329884	0.00727778
SVIL	-4.5	-4.39	1.02506	0.0357041	0.00787678
SWAP70	-3.365	-3.44	0.978198	-0.0318021	0.0070161
SYNGR4	-5.76	-5.65	1.01947	0.0278179	0.00613725
SYP	-7.75	-7.54	1.02785	0.0396318	0.00874308
SYT14	-7.76	-7.56	1.02646	0.0376704	0.00831049
SYT17	-2.71	-2.66	1.0188	0.0268666	0.00592739
SYT9	-7.6	-7.45	1.02013	0.028759	0.00634484
SYVN1	-3.705	-3.6575	1.01299	0.0186157	0.00410717
TAF10	3.49	3.54	0.985876	-0.0205223	0.0045278
TAF6	-1.8	-1.77	1.01695	0.0242475	0.00534962
TAF7L	-7.44	-7.27	1.02338	0.0333473	0.00735694
TAS1R1	-6.79	-6.6	1.02879	0.0409455	0.00903283
TAT	-7.79	-7.6	1.025	0.0356239	0.0078591
TBC1D14	-2.835	-2.905	0.975904	-0.0351894	0.00776327
TBC1D21	-7.43	-7.23	1.02766	0.0393666	0.00868459
TBCEL	-2.86	-2.78	1.02878	0.0409303	0.00902946
TBPL2	-7.8	-7.58	1.02902	0.0412763	0.00910577
TBR1	-7.62	-7.47	1.02008	0.0286828	0.00632802
TBX20	-7.5	-7.31	1.02599	0.0370192	0.00816685
TBX4	-7.8	-7.6	1.02632	0.0374747	0.00826732
TCEB2	5.81	5.78	1.00519	0.00746867	0.00164785
TCL1A	-7.71	-7.53	1.0239	0.034081	0.00751878
TCL1B	-7.76	-7.56	1.02646	0.0376704	0.00831049
TDG	-1.46	-1.5	0.973333	-0.0389941	0.00860245
TDO2	-4.22	-4.1	1.02927	0.0416191	0.00918138
TDRD6	-7.84	-7.62	1.02887	0.0410627	0.00905866
TDRKH	-7.7	-7.55	1.01987	0.0283818	0.00626163
TEX101	-7.63	-7.45	1.02416	0.0344426	0.00759855
TEX11	-7.63	-7.4	1.03108	0.0441578	0.00974126
TEX13A	-7.46	-7.26	1.02755	0.0392061	0.00864919
TFAP2C	-7.6	-7.43	1.02288	0.0326372	0.00720032
TFAP4	-4.46	-4.47	0.997763	-0.00323112	0.0007129
TFPI2	-7.82	-7.59	1.0303	0.0430687	0.00950108
TFR2	-6.7	-6.62	1.01208	0.0173299	0.0038235
TGFB2	-4.605	-4.655	0.989259	-0.01558	0.00343744
THBS2	-7.84	-7.64	1.02618	0.037281	0.0082246
THRAP3	-1.255	-1.245	1.00803	0.0115416	0.00254647
THRSP	-6.6	-6.5	1.01538	0.0220263	0.0048596
THUMPD1	-5.49	-5.56	0.98741	-0.0182787	0.00403283
TIAL1	1.83	1.84	0.994565	-0.00786212	0.00173465
TLCD2	-7.6	-7.44	1.02151	0.0306968	0.0067723
TLK2	-3.31667	-3.30667	1.00302	0.0043564	0.000961177
TLR3	-1.74	-1.75	0.994286	-0.00826762	0.00182412
TLX1	-4.61	-4.68	0.985043	-0.0217418	0.00479683
TMC1	-7.77	-7.54	1.0305	0.0433501	0.00956313
TMED10	4.145	4.035	1.02726	0.0388034	0.00856039
TMED11	-7.83	-7.63	1.02621	0.0373293	0.00823524
TMEM132B	-7.75	-7.52	1.03059	0.0434636	0.00958818
TMEM159	-6.345	-6.16	1.03003	0.0426898	0.00941752
TMEM168	-2.06	-2	1.03	0.0426443	0.00940749
TMEM179B	3.59	3.5	1.02571	0.0366289	0.00808078
TMEM183A	2.595	2.545	1.01965	0.0280689	0.0061926
TMEM190	-3.81	-3.755	1.01465	0.0209781	0.00462835
TMEM194A	-7.41	-7.21	1.02774	0.0394743	0.00870835
TMEM200A	-7.65	-7.47	1.0241	0.0343515	0.00757845
TMEM209	-4.0625	-4.1275	0.984252	-0.0229004	0.00505243
TMEM211	-7.91	-7.68	1.02995	0.0425714	0.0093914
TMEM225	-7.59	-7.41	1.02429	0.0346263	0.00763907
TMEM27	-3.7125	-3.7175	0.998655	-0.00194172	0.000428412
TMEM38A	-6.055	-6.06	0.999175	-0.00119083	0.00026274
TMEM59L	-5.95	-6	0.991667	-0.0120728	0.00266367
TMIE	-7.81	-7.63	1.02359	0.0336395	0.0074214
TMPRSS11A	-7.82	-7.62	1.02625	0.0373776	0.00824591
TMPRSS11D	-7.93	-7.69	1.03121	0.0443373	0.00978084
TMPRSS11F	-7.5	-7.31	1.02599	0.0370192	0.00816685
TNFRSF11A	-7.81	-7.58	1.03034	0.0431247	0.00951343
TNFRSF14	6.41	6.35	1.00945	0.0135678	0.00299349
TNFSF4	-7.82	-7.63	1.0249	0.0354855	0.00782859
TNMD	-7.71	-7.52	1.02527	0.0359982	0.00794166
TNNI2	-4.18	-4.06	1.02956	0.0420232	0.00927051
TNNT3	-7.85	-7.64	1.02749	0.03912	0.00863021
TNPO2	-4.29	-4.38	0.979452	-0.0299532	0.00660827
TOR2A	3.69	3.77	0.97878	-0.0309437	0.00682676
TP63	-7.81	-7.62	1.02493	0.0355316	0.00783873
TPD52L1	-7.77	-7.58	1.02507	0.0357167	0.00787958
TPH2	-7.42	-7.24	1.02486	0.0354295	0.00781622
TRAPPC10	-1.91	-1.97	0.969543	-0.044623	0.00984385
TREX1	-1.32	-1.35	0.977778	-0.0324215	0.00715273
TRIM37	-3.9925	-4.115	0.970231	-0.0436	0.00961825
TRIM55	-7.66667	-7.45667	1.02816	0.0400686	0.00883942
TRIM66	-7.88	-7.65	1.03007	0.0427359	0.00942768
TROVE2	-2.1	-2.07	1.01449	0.0207586	0.00457992
TRPC6	-7.63	-7.45	1.02416	0.0344426	0.00759855
TRPM3	-6.46667	-6.43667	1.00466	0.00670849	0.00148013
TRPV1	-6.21	-6.17	1.00648	0.00932278	0.00205692
TRPV3	-7.77	-7.56	1.02778	0.0395284	0.00872027
TSC2	0.23	0.223333	1.02985	0.0424353	0.00936138
TSHR	-7.305	-7.11	1.02743	0.0390347	0.0086114
TSHZ3	-5.2	-5.19	1.00193	0.00277708	0.000612723
TTC26	-6.195	-6.05	1.02397	0.0341691	0.00753822
TTC27	2.06	2.11	0.976303	-0.0345987	0.00763296
TTC9B	-5.54	-5.42	1.02214	0.0315931	0.00697001
TTN	-7.61333	-7.6	1.00175	0.00252883	0.000557949
TTPA	-7.67	-7.49	1.02403	0.0342609	0.00755845
TUB	-7.68	-7.49	1.02537	0.0361406	0.00797307
TUBB1	-7.53	-7.37	1.02171	0.0309852	0.00683592
TXNDC3	-7.57	-7.37	1.02714	0.0386287	0.00852184
TXNRD1	2.9675	2.895	1.02504	0.0356847	0.00787251
TYRP1	-7.7	-7.57	1.01717	0.0245651	0.00541968
UBA5	3.86	3.77	1.02387	0.0340363	0.00750893
UBE2N	0.495	0.51	0.970588	-0.0430687	0.00950108
UBXN6	3.87	3.89	0.994859	-0.00743659	0.00164077
UCHL3	3.45	3.47	0.994236	-0.0083393	0.00183994
UCN3	-4.62	-4.75	0.972632	-0.0400347	0.00883194
ULK3	-3.42	-3.52	0.971591	-0.0415791	0.00917256
UNC5D	-6.34	-6.23	1.01766	0.0252507	0.00557091
UNCX	-7.77	-7.6	1.02237	0.0319152	0.00704105
UOX	-7.65	-7.5	1.02	0.0285692	0.00630296
UPK1B	-5.24	-5.23	1.00191	0.00275587	0.000608042
USP21	-3.11	-3.04	1.02303	0.0328433	0.00724577
USP26	-7.55	-7.34	1.02861	0.0406966	0.00897792
USP36	-5.12	-4.97	1.03018	0.042898	0.00946342
USP4	2.72333	2.70667	1.00616	0.00885635	0.00195401
USP44	-6.162	-6.266	0.983402	-0.0241461	0.00532724
USP48	1.72	1.7	1.01176	0.0168738	0.00372288
USP50	-7.8	-7.585	1.02835	0.0403249	0.00889596
USPL1	-2.295	-2.26	1.01549	0.0221714	0.0048916
VAMP4	-3.35	-3.375	0.992593	-0.0107264	0.00236661
VAPA	1.825	1.88	0.970745	-0.0428362	0.0094498
VEPH1	-7.75	-7.56	1.02513	0.0358101	0.00790017
VEZF1	0.58	0.585	0.991453	-0.0123837	0.00273226
VGLL1	-7.92	-7.69	1.02991	0.0425168	0.00937937
VIP	-7.7	-7.49	1.02804	0.0398927	0.00880063
VPS16	2.85	2.78	1.02518	0.035877	0.00791494
VPS24	5.54	5.44	1.01838	0.0262793	0.00579783
VSTM2A	-4.92	-4.89	1.00613	0.00882385	0.00194684
VSTM2L	-7.44	-7.28	1.02198	0.0313642	0.00691951
VSX1	-7.45	-7.26	1.02617	0.0372709	0.00822237
WBP1	3.03	3.015	1.00498	0.00715979	0.0015797
WDR16	-7.84	-7.63	1.02752	0.0391706	0.00864137
WDR17	-7.9	-7.66	1.03133	0.0445083	0.00981855
WDR31	-2.01	-1.95	1.03077	0.0437214	0.00964502
WDR35	-3.01	-3.05	0.986885	-0.0190458	0.00420205
WDR37	-4.89	-4.8	1.01875	0.0268001	0.00591271
WDR47	-2.43	-2.505	0.97006	-0.0438543	0.00967433
WDR48	-1.8	-1.85333	0.971223	-0.0421255	0.00929306
WDR52	-7.76	-7.56	1.02646	0.0376704	0.00831049
WDR63	-5.515	-5.425	1.01659	0.0237377	0.00523716
WDR72	-7.8	-7.57	1.03038	0.0431808	0.0095258
WDR78	-6.35	-6.195	1.02502	0.0356523	0.00786537
WDR87	-7.85	-7.61	1.03154	0.0447962	0.00988205
WDR88	-7.62	-7.45	1.02282	0.0325506	0.00718121
WFDC8	-7.82	-7.59	1.0303	0.0430687	0.00950108
WIF1	-7.6	-7.42	1.02426	0.0345802	0.0076289
WIPF1	-2.83	-2.79	1.01434	0.0205369	0.00453103
WNT10B	-7.51	-7.28	1.03159	0.0448745	0.00989931
WNT16	-7.74	-7.56	1.02381	0.0339473	0.0074893
WNT3A	-7.63	-7.46	1.02279	0.0325074	0.00717169
WNT7A	-7.87	-7.65	1.02876	0.0409039	0.00902364
WSCD1	-2.91	-2.95	0.986441	-0.0196958	0.00434546
XRCC6	3.59	3.49	1.02865	0.0407568	0.00899121
XYLB	-3.46	-3.49	0.991404	-0.012455	0.00274798
XYLT2	-1.11	-1.08	1.02778	0.0395284	0.00872027
YIPF2	1.92	1.945	0.987147	-0.0186638	0.00411779
YIPF3	3.21	3.3	0.972727	-0.0398927	0.00880063
YPEL4	-7.82	-7.63	1.0249	0.0354855	0.00782859
YSK4	-7.01	-6.82	1.02786	0.0396427	0.00874549
YTHDF1	-1.5425	-1.5675	0.984051	-0.023195	0.00511741
YWHAB	4.93	4.87	1.01232	0.0176659	0.00389762
ZC3H12B	-7.18	-7.2	0.997222	-0.00401306	0.000885423
ZC3H12C	-6.94	-6.83	1.01611	0.0230501	0.00508545
ZC3H14	-3.195	-3.165	1.00948	0.0136104	0.0030029
ZC4H2	-2.415	-2.4	1.00625	0.00898878	0.00198323
ZCCHC10	-7.75	-7.56	1.02513	0.0358101	0.00790017
ZCCHC11	-2.84	-2.91	0.975945	-0.0351282	0.00774977
ZCWPW1	-6.61	-6.7	0.986567	-0.0195108	0.00430465
ZDHHC15	-5.66	-5.77	0.980936	-0.0277693	0.00612651
ZDHHC19	-7.88	-7.64	1.03141	0.044623	0.00984385
ZDHHC5	3.65	3.76	0.970745	-0.0428362	0.0094498
ZFAT	-6.48	-6.29	1.03021	0.0429338	0.00947133
ZFPM2	-5.13667	-5	1.02733	0.0389044	0.00858265
ZFYVE28	-7.48	-7.5	0.997333	-0.00385233	0.000849959
ZIC5	-7.71	-7.55	1.02119	0.0302542	0.00667467
ZIM2	-7.73	-7.56	1.02249	0.0320822	0.00707789
ZMYM3	-1.58	-1.57	1.00637	0.00916	0.00202101
ZMYM4	-2.62	-2.56	1.02344	0.033423	0.00737364
ZMYND12	-2.66	-2.71	0.98155	-0.0268666	0.00592739
ZNF165	-7.65	-7.48	1.02273	0.0324215	0.00715273
ZNF214	-7.64	-7.47	1.02276	0.0324644	0.0071622
ZNF287	-7.81	-7.61	1.02628	0.0374261	0.0082566
ZNF362	-2.26	-2.21	1.02262	0.0322764	0.00712073
ZNF385B	-7.67	-7.5	1.02267	0.032336	0.00713387
ZNF385C	-7.73	-7.54	1.0252	0.0359039	0.00792086
ZNF385D	-7.69	-7.57	1.01585	0.0226903	0.00500608
ZNF451	-3.55	-3.52	1.00852	0.0122436	0.00270134
ZNF483	-7.74	-7.54	1.02653	0.037769	0.00833224
ZNF606	-5.62	-5.63	0.998224	-0.00256479	0.000565884
ZNF646	-2.89	-2.83	1.0212	0.0302674	0.00667758
ZNF668	-4.05	-4.16	0.973558	-0.0386616	0.00852911
ZNF710	-4.92	-4.9	1.00408	0.00587657	0.00129658
ZNF774	-6.94	-7.16	0.969274	-0.0450239	0.00993227
ZNF804B	-7.28	-7.13	1.02104	0.0300364	0.00662661
ZRANB3	-3.005	-2.92	1.02911	0.0413966	0.00913232
ZSCAN4	-7.765	-7.58	1.02441	0.0347881	0.00767474
ZXDC	-4.31	-4.27	1.00937	0.0134518	0.0029679
