# Supplementary material for: Identification of hydatidosis-related modules and key regulatory genes
Source: PeerJ. 2020 Jun 18;8:e9280. doi: 10.7717/peerj.9280 (PMC7306218; doi:10.7717/peerj.9280)
Supplement: Supplemental Information 2 [file peerj-08-9280-s002.xlsx]

## Sheet: Sheet1
Table S2.Protein difference quantitative experiment results
gene name	Group_A.average	Group_C.average	FC	logFC	pvalue
ALB	1.10898e+11	2.7509e+10	4.03131	2.01125	0.0425796
DKFZp686C15213	1.24826e+09	1.09187e+09	1.14323	0.193117	0.0479357
HEL-S-71p	2.69888e+09	1.16392e+09	2.31879	1.21337	0.0199513
SPTBN1	6.47247e+08	7.22892e+08	0.895358	-0.159463	0.00261145
TUBA1A	2.52017e+08	5.32307e+07	4.73442	2.24319	0.0295487
MYH10	5.12335e+08	5.01925e+08	1.02074	0.029616	0.0384597
DKFZp686I15212	2.06225e+09	3.32817e+08	6.19635	2.63142	0.0434716
EHHADH	1.30865e+09	2.79277e+09	0.468586	-1.09361	0.0360231
MTTP	1.09249e+09	1.64137e+09	0.665594	-0.587286	0.0325218
ALDH4A1	1.98741e+09	4.21141e+09	0.471911	-1.08341	0.0372702
APOA1	8.12652e+09	2.86789e+09	2.83362	1.50265	0.0135418
IQGAP1	7.65289e+08	2.31943e+08	3.29947	1.72223	0.0466104
CYP2C9	1.04148e+09	2.28896e+09	0.455002	-1.13605	0.0367925
ALDH1B1	4.53446e+08	1.72788e+09	0.262429	-1.93	0.0467519
RDH16	1.08966e+09	2.75729e+09	0.395193	-1.33937	0.0346798
SLC27A5	7.80044e+08	1.93287e+09	0.403568	-1.30912	0.0140157
ETFDH	4.82788e+08	1.33295e+09	0.362196	-1.46516	0.0278472
hCG_1993905	4.72248e+08	1.42699e+09	0.33094	-1.59536	0.0138362
ALDOA	2.16751e+09	9.47225e+08	2.28828	1.19426	0.0308334
PLG	2.1176e+09	2.90045e+08	7.30094	2.86808	0.0265906
ASL	7.43617e+08	2.0776e+09	0.357921	-1.48229	0.034281
ACSL5	2.78616e+08	5.58108e+08	0.499216	-1.00226	0.00322172
CYP3A4	4.37343e+08	1.41042e+09	0.31008	-1.68929	0.0265161
CYP2C8	4.35081e+08	1.09922e+09	0.395808	-1.33713	0.023217
GPT	3.17094e+08	1.1506e+09	0.27559	-1.85941	0.0486578
APOH	1.4357e+09	4.09939e+08	3.50224	1.80828	0.0192891
GC	1.3497e+09	3.56901e+08	3.78172	1.91904	0.00893558
CYP1A2	3.47271e+08	1.62556e+09	0.213631	-2.22681	0.0368282
CES2	6.28722e+08	9.54338e+08	0.658805	-0.602077	0.0261244
ACOX2	4.29495e+08	7.82028e+08	0.549206	-0.86458	0.0336473
DPYSL2	4.6921e+08	1.45292e+08	3.22942	1.69128	0.0350787
AKR1D1	2.73096e+08	1.73281e+09	0.157603	-2.66563	0.0118613
BAAT	5.07685e+08	1.59564e+09	0.318171	-1.65213	0.0392327
NADK2	3.15668e+08	6.741e+08	0.468281	-1.09455	0.0209027
PON3	3.06927e+08	7.7536e+08	0.395851	-1.33697	0.0114617
BDH1	7.67162e+08	1.47697e+09	0.519415	-0.945039	0.0402752
MUT	5.38615e+08	1.07113e+09	0.502845	-0.991814	0.0371185
MAOA	3.7092e+08	1.05922e+09	0.350181	-1.51383	0.0294693
F2	8.95493e+08	1.56494e+08	5.72222	2.51657	0.0354352
AASS	1.28985e+08	5.24314e+08	0.246008	-2.02322	0.0483119
HEL-S-22	2.21268e+09	7.29557e+08	3.03291	1.6007	0.0203006
UGT1A4	3.84221e+08	1.35743e+09	0.28305	-1.82087	0.0406555
ACSS3	2.4363e+08	3.66762e+08	0.664273	-0.590151	0.049073
CLU	3.15076e+09	2.75753e+08	11.426	3.51425	0.0125576
HEL-S-299	5.1304e+08	1.33751e+09	0.383578	-1.38241	0.0120987
NIPSNAP1	6.00197e+08	1.34491e+09	0.446272	-1.164	0.0228799
MYO1B	1.6737e+08	3.00479e+08	0.557012	-0.844219	0.00613325
SLC27A2	3.07356e+08	1.08881e+09	0.282286	-1.82477	0.0312872
GALK1	4.08863e+08	9.11599e+08	0.448512	-1.15678	0.0344042
UGT2B15	7.02933e+08	1.87769e+09	0.374361	-1.4175	0.0177546
AK2	7.42941e+08	1.04525e+09	0.710776	-0.492534	0.00148321
SPR	2.05677e+08	4.0597e+08	0.50663	-0.980994	0.00242539
ARPC1B	4.46722e+08	1.71141e+08	2.61026	1.38419	0.0282382
PECR	3.19131e+08	5.4992e+08	0.580323	-0.785072	0.00672525
PABPC1	3.51996e+08	3.64413e+08	0.965927	-0.0500139	0.0416178
CD163	3.8463e+08	2.04997e+08	1.87628	0.907873	0.0209934
HSPE1	1.05309e+09	2.49508e+09	0.422064	-1.24447	0.0481611
C4B	4.3211e+08	2.99201e+08	1.44421	0.530284	0.00769362
SFXN1	6.12097e+08	1.14848e+09	0.532963	-0.907894	0.0198524
RHOA	5.37892e+08	2.51458e+08	2.1391	1.097	0.0309599
SLC2A2	7.28465e+08	1.36549e+09	0.533481	-0.90649	0.0205234
ISOC2	1.87007e+08	4.2003e+08	0.445222	-1.1674	0.041118
CYCS	3.06066e+08	6.00034e+08	0.510082	-0.971199	0.0221826
DKFZp761K058	2.41735e+08	3.74791e+08	0.644986	-0.632661	0.038549
MGST1	1.56891e+09	4.30789e+09	0.364194	-1.45722	0.00804273
CORO1A	1.24797e+09	1.90935e+08	6.53608	2.70843	0.0445414
CRAT	2.92134e+08	4.08036e+08	0.715951	-0.482066	0.0221918
CYBB	6.21152e+08	1.53472e+08	4.04733	2.01697	0.0355418
ECI1	5.13443e+08	1.15925e+09	0.442909	-1.17492	0.0278256
CLIC1	9.71296e+08	3.69256e+08	2.63041	1.39529	0.0300152
CTNND1	1.272e+08	1.9495e+08	0.652477	-0.616001	0.00767967
ITIH2	8.3649e+08	9.91798e+07	8.43407	3.07623	0.0390674
RAN	9.89381e+08	6.16016e+08	1.6061	0.68356	0.0354277
DSP	5.60441e+07	1.21633e+08	0.460765	-1.1179	0.020247
ITGA1	1.81907e+08	2.896e+08	0.62813	-0.670865	0.020134
NDUFV1	2.1896e+08	3.5863e+08	0.610545	-0.71183	0.0358921
SERPING1	6.53626e+08	2.99304e+08	2.18382	1.12685	0.0320365
43354	1.00193e+08	7.64471e+07	1.31062	0.390248	0.048791
SPCS2	3.27912e+08	1.63504e+08	2.00553	1.00398	0.0271758
PHYH	1.79954e+08	4.80506e+08	0.37451	-1.41692	0.0289633
RAB35	8.89136e+07	5.47898e+07	1.62281	0.698495	0.0427301
CSTB	7.97306e+08	3.72786e+08	2.13878	1.09679	0.0404213
HEL-S-43	2.60912e+09	5.66164e+08	4.60842	2.20427	0.0206676
METTL7B	2.02001e+08	5.35107e+08	0.377496	-1.40547	0.0185431
PGRMC2	2.87398e+08	4.70306e+08	0.611088	-0.710549	0.0126446
AK4	1.68528e+08	4.11752e+08	0.409295	-1.28879	0.0447309
ABHD10	1.13871e+08	1.92904e+08	0.590298	-0.760484	0.031348
NDUFA10	1.65204e+08	3.3055e+08	0.499785	-1.00062	0.00271456
C1R	2.75921e+08	6.97197e+07	3.95758	1.98462	0.0452782
APOA4	4.56813e+08	4.46551e+07	10.2298	3.35471	0.0143896
ARHGDIB	8.89817e+08	3.65852e+08	2.43218	1.28225	0.0316477
ATP5F1C	4.73127e+08	7.68421e+08	0.615713	-0.69967	0.0420255
TOMM70	1.06538e+08	2.07272e+08	0.514	-0.960161	0.0066873
HEL-S-303	2.5956e+08	1.75021e+08	1.48302	0.568542	0.0423602
EIF2S3	1.97202e+08	1.5485e+08	1.27351	0.348808	0.0128906
NAGK	1.7779e+08	9.40787e+07	1.8898	0.918232	0.0368039
STBD1	1.19856e+08	2.65127e+08	0.452071	-1.14538	0.0345263
ICAM1	4.20443e+08	1.5534e+08	2.7066	1.43648	0.0256821
ASGR1	3.09176e+08	5.6443e+08	0.547767	-0.868364	0.0266491
DHTKD1	8.66227e+07	2.24717e+08	0.385474	-1.3753	0.0353063
ACLY	1.3625e+08	7.79841e+07	1.74715	0.805007	0.0163637
ARPC4-TTLL3	1.0208e+09	4.40012e+08	2.31995	1.21409	0.0173126
CAPNS1	2.43438e+08	2.63831e+08	0.922704	-0.11606	0.00493631
RPS6	4.6805e+08	6.38047e+08	0.733568	-0.446998	0.0412782
RPS14	3.9925e+08	7.56373e+08	0.527848	-0.921805	0.0443937
TXN	1.43162e+09	2.27073e+09	0.630466	-0.665509	0.044434
MGST3	5.39072e+08	3.43099e+08	1.57118	0.651852	0.0277691
ACTR1A	2.16002e+08	1.45421e+08	1.48535	0.570807	0.03224
MSRA	1.22467e+08	1.86532e+08	0.656545	-0.607034	0.00201734
NSF	2.00419e+08	1.42609e+08	1.40537	0.490953	0.0486435
SERPINF2	3.34772e+08	5.535e+07	6.04828	2.59653	0.00356322
HIST2H3PS2	2.65491e+09	3.32771e+09	0.797818	-0.325868	0.0175154
GLYATL1	1.61943e+08	3.10667e+08	0.521273	-0.939889	0.0446807
FIS1	2.63498e+08	5.25963e+08	0.500982	-0.99717	0.0424264
TPT1	3.81798e+08	2.76719e+08	1.37973	0.464387	0.0201785
CUBN	1.90527e+08	3.06358e+08	0.62191	-0.685223	0.0340901
EHD4	1.53559e+08	7.76184e+07	1.97839	0.984326	0.0374264
ARHG	1.8924e+08	5.35264e+07	3.53545	1.82189	0.0263227
CPOX	9.70444e+07	1.7284e+08	0.561471	-0.832716	0.00812245
REEP6	2.88335e+08	7.81708e+08	0.368852	-1.43888	0.0464639
GNG12	1.05459e+08	1.98993e+08	0.529964	-0.916034	0.00657131
ATP5L	3.71891e+08	7.20528e+08	0.516137	-0.954175	0.0387885
NDUFA4	4.76922e+08	1.00219e+09	0.475878	-1.07134	0.0484126
PRRC1	1.06623e+08	1.5803e+08	0.674704	-0.567674	0.0101427
ASGR2	2.54256e+08	1.68204e+08	1.51159	0.596066	0.0104672
BSG	4.33578e+08	2.15335e+08	2.01351	1.00971	0.0101229
GGCX	7.96439e+07	1.86577e+08	0.426868	-1.22814	0.0258951
RPL7A	3.3248e+08	4.7033e+08	0.706907	-0.500408	0.0275886
RUVBL2	1.61821e+08	9.6794e+07	1.67181	0.741407	0.0445073
CIAO1	9.46705e+07	5.71442e+07	1.6567	0.728308	0.0184908
SGPL1	4.9499e+07	6.23622e+07	0.793734	-0.333273	0.0319878
MAPK1	2.12981e+08	1.34084e+08	1.58841	0.667587	0.00813129
JCHAIN	3.54149e+08	7.63517e+07	4.63839	2.21362	0.00224374
SEC61B	4.01436e+08	6.66971e+08	0.601879	-0.732455	0.0221876
KANK2	4.7334e+07	4.21057e+07	1.12417	0.168859	0.0251279
ME2	1.3822e+08	7.09753e+07	1.94744	0.961577	0.0455549
DYNLT1	7.4919e+07	3.24425e+07	2.30929	1.20745	0.00821237
RPL9	8.03361e+07	2.18268e+08	0.368062	-1.44198	0.00249254
TOR1AIP1	1.67041e+08	8.4804e+07	1.96974	0.978002	0.0066632
EIF3H	6.03707e+07	5.7966e+07	1.04148	0.058641	0.0437152
PRCP	1.244e+08	4.78099e+07	2.60197	1.3796	0.013092
OSBP	1.84207e+08	9.70592e+07	1.89788	0.924387	0.00649588
TBCA	1.29707e+08	2.96358e+08	0.437672	-1.19208	0.00214025
TMX1	1.65408e+08	7.62904e+07	2.16813	1.11645	0.0303755
M6PR	8.96895e+07	8.45261e+07	1.06109	0.0855414	0.0367338
PFDN5	6.23735e+07	4.61304e+07	1.35211	0.435216	0.0386735
ALYREF	8.29201e+07	6.15075e+07	1.34813	0.430959	0.0337829
ASNA1	1.97755e+08	4.50958e+07	4.38523	2.13265	0.00278979
ITPR2	2.33609e+07	4.25117e+07	0.549516	-0.863766	0.0156288
TNPO3	3.67405e+07	3.27683e+07	1.12122	0.165067	0.0396915
TMEM97	1.45348e+08	2.26642e+08	0.641311	-0.640903	0.0153659
MFAP2	1.67573e+08	1.859e+08	0.901417	-0.149733	0.0246961
SRP14	1.83345e+08	1.18424e+08	1.54821	0.630603	0.0189473
IGH@	1.19354e+09	4.574e+08	2.60941	1.38372	0.0134514
SF1	5.34418e+07	2.80103e+07	1.90793	0.932011	0.0143326
NAAA	5.22751e+07	8.14974e+07	0.641433	-0.640629	0.0381865
hCG_1998059	9.26377e+07	8.6514e+07	1.07078	0.0986659	0.0337367
EEFSEC	5.45442e+07	6.77201e+07	0.805436	-0.312157	0.045037
ALDH18A1	8.6141e+07	2.40146e+07	3.58702	1.84279	0.0017794
LUC7L2	1.98465e+08	2.67098e+07	7.43041	2.89344	0.00733604
SFXN5	3.16586e+07	9.153e+07	0.345882	-1.53165	0.0146871
DCD	1.7638e+08	7.74995e+07	2.27589	1.18643	0.0050594
HLA-B	3.55963e+08	1.69091e+08	2.10516	1.07393	0.0212273
OSGEP	9.74175e+07	5.74656e+07	1.69523	0.761482	0.024878
SRP9	3.64595e+08	4.08936e+07	8.91569	3.15635	0.0230896
ACTG1	1.80858e+09	6.94627e+08	2.60368	1.38055	0.00025682
AFM	4.40835e+07	1.09167e+08	0.403816	-1.30823	0.0466244
ALB	4.97401e+09	1.37911e+10	0.360668	-1.47126	0.000164391
AMBP	3.04944e+09	3.97012e+09	0.768096	-0.380641	0.0393459
APCS	5.9085e+09	8.35458e+09	0.707217	-0.499775	0.0315574
APOA1	8230523159	1.57863e+10	0.521372	-0.939614	0.00169762
APOA2	1483698521	2.83735e+09	0.522918	-0.935344	1.4036e-05
APOB	3750415444	9.81675e+09	0.382042	-1.3882	8.24162e-05
APOC1	1.24055e+08	4.17098e+08	0.297424	-1.74941	0.00113939
APOC3	4.69459e+08	1.70687e+09	0.275041	-1.86228	5.26263e-06
APOC4-APOC2	5.24659e+07	2.79701e+08	0.187578	-2.41444	0.000309763
APOD	1.04398e+09	1.58111e+09	0.660279	-0.598853	0.00543358
APOE	7.30656e+07	2.78206e+08	0.262632	-1.92889	7.06676e-05
APOH	3.79042e+08	1.358e+09	0.279118	-1.84105	6.52983e-05
APOM	1.11306e+08	1.75681e+08	0.633567	-0.658432	0.0130259
ATRN	7.99083e+08	1.03448e+09	0.772449	-0.372489	0.045924
AZGP1	4.34773e+09	7.5687e+09	0.574435	-0.799783	0.000220828
BCHE	3.22657e+08	7.30225e+08	0.441859	-1.17834	0.000252811
BTD	3.34409e+08	5.51508e+08	0.606353	-0.72177	0.00069814
C1QA	3.6374e+07	1.079e+08	0.337109	-1.56871	0.00212951
C1QB	7.8062e+08	1.50488e+09	0.518726	-0.946955	0.00372739
C1QC	1.00765e+09	2262064267	0.445457	-1.16664	0.0022634
C1R	1.47612e+09	2.30633e+09	0.640028	-0.643793	0.00641628
C1RL	7.5729e+08	1.02454e+09	0.739151	-0.43606	0.00290159
C1S	8.63107e+07	3.00522e+08	0.287202	-1.79986	0.0219675
C4BPA	2500015730	4424942072	0.564983	-0.823721	0.00601758
C4BPB	2.26209e+08	4.20007e+08	0.538584	-0.892756	0.00142176
C5	1.25464e+09	1830773208	0.685306	-0.54518	0.00659242
C9	3.19865e+09	1.84519e+09	1.7335	0.793688	0.000888438
CA1	4.43325e+07	1.20889e+08	0.36672	-1.44725	0.00543072
CFHR1	1.08609e+08	2.97511e+08	0.365059	-1.4538	0.00719409
CFI	2.81988e+08	5.44681e+08	0.517712	-0.949778	0.000121153
CLU	2.26486e+09	1.91228e+09	1.18438	0.244126	0.00775832
CP	9.36061e+09	1.16071e+09	8.06455	3.01159	0.00309527
CRP	1.90554e+09	1.17227e+08	16.2551	4.02282	0.0208475
DCD	0.01	2.33156e+08	4.28898e-11	-34.4406	0.0412318
DKFZP686J11235	6.20776e+07	1.11767e+08	0.555421	-0.848346	0.0456389
ENO1	4.99582e+07	0.01	4.99582e+09	32.2181	0.00352981
F10	1.65545e+08	2.91813e+08	0.567299	-0.817818	1.86792e-07
F11	7.96204e+07	144098852	0.55254	-0.855848	0.0115079
F2	4.39609e+09	8.25387e+09	0.53261	-0.908849	5.88725e-07
F9	2.01142e+08	3.04781e+08	0.659957	-0.599556	0.0236044
FCGBP	3.4833e+07	8.23837e+07	0.422814	-1.24191	0.00758722
FCGR3B	4.57517e+07	1.14437e+08	0.399797	-1.32266	0.0303531
FCN2	1.62551e+08	3.2595e+08	0.4987	-1.00376	0.00674276
FCN3	8.67206e+08	1.83386e+09	0.472886	-1.08044	0.000542556
FGG	17168555534	1.39406e+10	1.23155	0.300472	0.0425171
FGL1	1.13583e+08	1.28131e+06	88.646	6.46998	0.00019375
FLNA	9.68854e+07	4.66903e+07	2.07507	1.05316	0.00897114
FN1	3.50318e+09	1.08154e+10	0.323905	-1.62636	0.00022948
GLNC1	4.01749e+08	7.61614e+08	0.527497	-0.922764	0.021323
GPLD1	3.53731e+08	7.98941e+08	0.44275	-1.17544	5.69367e-06
GPX3	5.06934e+08	9.22458e+08	0.549547	-0.863685	0.00341341
GSN	4361783023	9.51977e+09	0.458182	-1.12601	0.0446566
HBB	5.44578e+08	1.25533e+09	0.433811	-1.20486	0.00317555
HCG_40889	1.24111e+09	2.08911e+09	0.594088	-0.751251	0.0466296
HEL-S-2A	0.01	1.68048e+07	5.95068e-10	-30.6462	0.0433048
HEL-S-72P	4.82324e+07	0.01	4.82324e+09	32.1674	0.00339076
HGFAC	1.20294e+08	2.18792e+08	0.54981	-0.862996	0.018768
HPX	4.87687e+10	6.31471e+10	0.772302	-0.372762	0.009672
IGFBP3	3.99045e+06	1.43042e+08	0.0278971	-5.16374	3.65991e-06
IGHG4	1.87806e+10	1.13582e+09	16.5348	4.04744	0.0434879
IGK@	5.36324e+08	1.74422e+08	3.07486	1.62052	0.00425368
IGKV3-7	4.86784e+08	2.21217e+08	2.20049	1.13782	0.0495788
IGLV5-45	0.01	1.66117e+07	6.01984e-10	-30.6296	0.0470621
ITIH2	1.1064e+10	1.69762e+10	0.651736	-0.61764	0.00165009
ITIH3	1855446212	8.79092e+08	2.11064	1.07768	0.00224491
ITIH4	6.0305e+09	7267972874	0.829736	-0.269276	0.0499044
KLKB1	1.06735e+09	1710873646	0.623861	-0.680702	0.000562162
LAMP1	0.01	1.74276e+07	5.73804e-10	-30.6987	0.00617665
LPA	6.81184e+08	3.23156e+08	2.10791	1.07582	0.0232815
LRG1	2.88253e+08	1.07172e+08	2.68964	1.42741	0.00468403
LYVE1	3.09319e+07	8.38162e+07	0.369044	-1.43813	0.0203008
MASP1	1.92956e+08	3.01188e+08	0.640649	-0.642394	0.00257747
MASP2	1.71208e+08	2.37631e+08	0.720481	-0.472968	0.000386199
PCYOX1	3.75506e+07	8.19088e+07	0.458444	-1.12518	0.0255023
PF4V1	8.69091e+07	0.01	8.69091e+09	33.0169	0.011649
PFN1	4.57117e+08	1.39221e+08	3.28339	1.71519	0.0139611
PGLYRP2	6.08686e+08	9.78818e+08	0.621858	-0.685342	0.00244692
PLG	1.20891e+09	2.44264e+09	0.494919	-1.01473	2.72149e-05
PON1	2638034984	6.49513e+09	0.406156	-1.29989	1.7885e-05
PON3	9.39073e+08	2.08127e+09	0.451202	-1.14816	0.000287727
PRG4	1.66563e+08	2.90745e+08	0.572882	-0.803691	0.0052365
PROS1	4.43522e+08	7.79264e+08	0.569155	-0.813105	0.000460347
PSMD6	2.01938e+07	0.01	2.01938e+09	30.9113	0.0336492
RBP4	1.99497e+09	6.23503e+09	0.319962	-1.64403	3.3173e-06
SAA1	1.46895e+08	9.99912e+06	14.6908	3.87684	0.0169789
SELENOP	3.76708e+07	1.84159e+08	0.204556	-2.28943	3.4306e-06
SERPINA1	6.80563e+08	0.01	6.80563e+10	35.986	0.0110048
SERPINA5	4.09133e+07	2.73546e+08	0.149566	-2.74114	4.31587e-06
SERPINC1	6106601679	8.17067e+09	0.747381	-0.420084	0.00525538
SERPIND1	3.70042e+09	4754334631	0.778325	-0.361556	0.0239803
SERPINF2	1.59781e+09	1.92045e+09	0.832	-0.265345	0.0386926
SERPING1	7.57329e+09	1.04155e+10	0.727117	-0.45974	0.0214834
SHBG	3.77466e+08	2.91278e+07	12.959	3.69588	0.0492681
SPP2	3.86569e+07	1.21684e+08	0.317682	-1.65434	0.000338999
SSC5D	0.01	5.83662e+06	1.71332e-09	-29.1206	0.0408524
TAGLN2	1.43434e+07	0.01	1.43434e+09	30.4177	0.0342132
TLN1	1.54619e+08	4.60188e+07	3.35991	1.74842	0.00452892
TUBB1	6.47507e+07	2.06835e+07	3.13055	1.64642	0.011172
VTN	1.25912e+10	1.86063e+10	0.676718	-0.563372	0.000220619
VWF	7.32868e+07	3.56257e+08	0.205713	-2.28129	0.00166054
