# Supplementary material for: Identification of hydatidosis-related modules and key regulatory genes
Source: PeerJ. 2020 Jun 18;8:e9280. doi: 10.7717/peerj.9280 (PMC7306218; doi:10.7717/peerj.9280)
Supplement: Supplemental Information 4 [file peerj-08-9280-s004.xlsx]

## Sheet: human
Table S4.Enrichment results of functional modules of human echinococcosis
Module	ID	Description	GeneRatio	BgRatio	pvalue	p.adjust	qvalue	geneID	Count
KEGG_Pathway_Module_1	hsa03040	Spliceosome	104/182	134/7469	9.67552e-155	3.96697e-153	2.95358e-153	10084/10189/10262/10285/10286/10291/10450/10465/10523/10569/10594/10713/10772/10907/10946/10992/11017/11157/11325/11338/1655/1665/199746/220988/22827/22916/22938/23020/23450/23451/23658/24148/25804/26121/27316/27339/3178/3183/3190/3192/3303/3312/4116/4670/4686/5093/51340/51362/51645/51690/51729/5356/55110/55660/55696/56259/56949/57187/57819/6426/6427/6428/6429/6430/6431/6432/6434/6625/6626/6627/6…	104
KEGG_Pathway_Module_1	hsa03013	RNA transport	51/182	171/7469	3.89884e-43	7.99262e-42	5.95086e-42	100101267/10189/10250/10482/10762/10921/11097/11260/129401/22794/22916/23165/23225/23279/23511/23636/29107/348995/3837/4116/4686/4927/53371/55110/55706/55746/55998/56000/57122/57187/5903/65109/7175/728343/79023/7919/79228/79902/80145/8021/8086/84321/8480/8563/9631/9688/9775/9883/9939/9972/9984	51
KEGG_Pathway_Module_1	hsa03015	mRNA surveillance pathway	31/182	91/7469	4.14275e-28	5.66176e-27	4.21543e-27	10189/10250/10482/10898/10914/10921/10978/11051/1477/1478/1479/22794/22916/29107/29894/4116/4686/51585/51692/53981/55110/55998/56000/65109/728343/7919/79869/8106/81608/9775/9939	31
KEGG_Pathway_Module_1	hsa03020	RNA polymerase	12/182	31/7469	2.87562e-12	2.94751e-11	2.19455e-11	5430/5431/5432/5433/5434/5435/5436/5437/5438/5439/5440/5441	12
KEGG_Pathway_Module_1	hsa00240	Pyrimidine metabolism	12/182	101/7469	5.48843e-06	4.50051e-05	3.35083e-05	5430/5431/5432/5433/5434/5435/5436/5437/5438/5439/5440/5441	12
KEGG_Pathway_Module_1	hsa05168	Herpes simplex infection	15/182	185/7469	4.14673e-05	0.00028336	0.000210974	10189/10482/3190/5430/55998/56000/6426/6427/6428/6429/6430/6431/6432/728343/8683	15
KEGG_Pathway_Module_1	hsa05164	Influenza A	13/182	171/7469	0.000260006	0.00152289	0.00113386	10482/10898/11100/29107/3303/3312/3838/55998/56000/728343/7919/8106/8480	13
KEGG_Pathway_Module_1	hsa00230	Purine metabolism	12/182	174/7469	0.00107035	0.00548557	0.00408425	5430/5431/5432/5433/5434/5435/5436/5437/5438/5439/5440/5441	12
KEGG_Pathway_Module_1	hsa05016	Huntington disease	12/182	193/7469	0.00258502	0.0117762	0.0087679	5430/5431/5432/5433/5434/5435/5436/5437/5438/5439/5440/5441	12
KEGG_Pathway_Module_1	hsa03018	RNA degradation	7/182	79/7469	0.00300479	0.0123197	0.00917253	11157/23658/25804/3313/51690/57819/23517	7
KEGG_Pathway_Module_1	hsa04623	Cytosolic DNA-sensing pathway	5/182	63/7469	0.018286	0.0681569	0.0507459	5434/5435/5437/5440/5441	5
KEGG_Pathway_Module_1	hsa03008	Ribosome biogenesis in eukaryotes	6/182	105/7469	0.042729	0.145991	0.108696	10482/29107/55998/56000/728343/4809	6
KEGG_Pathway_Module_1	hsa04612	Antigen processing and presentation	4/182	77/7469	0.117911	0.371872	0.276875	3303/3308/3309/3312	4
KEGG_Pathway_Module_1	hsa05020	Prion diseases	2/182	35/7469	0.209487	0.613497	0.456776	3303/3309	2
KEGG_Pathway_Module_1	hsa04216	Ferroptosis	2/182	40/7469	0.254748	0.696311	0.518434	5093/5094	2
KEGG_Pathway_Module_1	hsa03022	Basal transcription factors	2/182	45/7469	0.300203	0.769269	0.572755	2962/2963	2
KEGG_Pathway_Module_1	hsa05134	Legionellosis	2/182	55/7469	0.389235	0.938743	0.698936	3303/3312	2
KEGG_Pathway_Module_1	hsa03060	Protein export	1/182	23/7469	0.433478	0.967946	0.720678	3309	1
KEGG_Pathway_Module_1	hsa04213	Longevity regulating pathway - multiple species	2/182	62/7469	0.44856	0.967946	0.720678	3303/3312	2
KEGG_Pathway_Module_1	hsa05131	Shigellosis	2/182	65/7469	0.472992	0.969633	0.721935	199746/7307	2
KEGG_Pathway_Module_1	hsa05216	Thyroid cancer	1/182	37/7469	0.599481	0.999463	0.744144	7175	1
KEGG_Pathway_Module_1	hsa05322	Systemic lupus erythematosus	3/182	133/7469	0.633977	0.999463	0.744144	6628/6632/6634	3
KEGG_Pathway_Module_1	hsa04657	IL-17 signaling pathway	2/182	93/7469	0.666784	0.999463	0.744144	1994/6426	2
KEGG_Pathway_Module_1	hsa04330	Notch signaling pathway	1/182	48/7469	0.695142	0.999463	0.744144	22938	1
KEGG_Pathway_Module_1	hsa05145	Toxoplasmosis	2/182	113/7469	0.766993	0.999463	0.744144	3303/3312	2
KEGG_Pathway_Module_1	hsa04141	Protein processing in endoplasmic reticulum	3/182	165/7469	0.771755	0.999463	0.744144	3303/3309/3312	3
KEGG_Pathway_Module_1	hsa05211	Renal cell carcinoma	1/182	69/7469	0.819146	0.999463	0.744144	5546	1
KEGG_Pathway_Module_1	hsa05202	Transcriptional misregulation in cancer	3/182	186/7469	0.836945	0.999463	0.744144	1655/2521/5546	3
KEGG_Pathway_Module_1	hsa05162	Measles	2/182	132/7469	0.836961	0.999463	0.744144	3303/3312	2
KEGG_Pathway_Module_1	hsa04918	Thyroid hormone synthesis	1/182	74/7469	0.840325	0.999463	0.744144	3309	1
KEGG_Pathway_Module_1	hsa04915	Estrogen signaling pathway	2/182	137/7469	0.851932	0.999463	0.744144	3303/3312	2
KEGG_Pathway_Module_1	hsa04152	AMPK signaling pathway	1/182	120/7469	0.949432	0.999463	0.744144	1994	1
KEGG_Pathway_Module_1	hsa05203	Viral carcinogenesis	2/182	201/7469	0.959586	0.999463	0.744144	22938/3190	2
KEGG_Pathway_Module_1	hsa04120	Ubiquitin mediated proteolysis	1/182	137/7469	0.966999	0.999463	0.744144	27339	1
KEGG_Pathway_Module_1	hsa04144	Endocytosis	2/182	244/7469	0.983952	0.999463	0.744144	3303/3312	2
KEGG_Pathway_Module_1	hsa04530	Tight junction	1/182	170/7469	0.985629	0.999463	0.744144	3308	1
KEGG_Pathway_Module_1	hsa05152	Tuberculosis	1/182	179/7469	0.988552	0.999463	0.744144	3313	1
KEGG_Pathway_Module_1	hsa05169	Epstein-Barr virus infection	1/182	201/7469	0.993441	0.999463	0.744144	22938	1
KEGG_Pathway_Module_1	hsa05205	Proteoglycans in cancer	1/182	201/7469	0.993441	0.999463	0.744144	1655	1
KEGG_Pathway_Module_1	hsa04010	MAPK signaling pathway	2/182	295/7469	0.994834	0.999463	0.744144	3303/3312	2
KEGG_Pathway_Module_1	hsa05206	MicroRNAs in cancer	1/182	299/7469	0.999463	0.999463	0.744144	3190	1
KEGG_Pathway_Module_10	hsa05130	Pathogenic Escherichia coli infection	43239	55/7469	1.93354e-07	4.83386e-06	3.05296e-06	10382/10383/203068/7277/7846	5
KEGG_Pathway_Module_10	hsa04145	Phagosome	43270	152/7469	1.40321e-06	1.72283e-05	1.08811e-05	10382/10383/1778/203068/7277/7846	6
KEGG_Pathway_Module_10	hsa04540	Gap junction	43239	88/7469	2.0674e-06	1.72283e-05	1.08811e-05	10382/10383/203068/7277/7846	5
KEGG_Pathway_Module_10	hsa04962	Vasopressin-regulated water reabsorption	43150	44/7469	0.00544247	0.0326798	0.0206399	1778/8766	2
KEGG_Pathway_Module_10	hsa04390	Hippo signaling pathway	43178	154/7469	0.00653596	0.0326798	0.0206399	7531/7532/84962	3
KEGG_Pathway_Module_10	hsa04530	Tight junction	43178	170/7469	0.00858483	0.0357701	0.0225917	4218/7277/7846	3
KEGG_Pathway_Module_10	hsa04972	Pancreatic secretion	43150	96/7469	0.0242541	0.0866218	0.0547085	4218/8766	2
KEGG_Pathway_Module_10	hsa04110	Cell cycle	43150	124/7469	0.0388901	0.10962	0.0692336	7531/7532	2
KEGG_Pathway_Module_10	hsa04114	Oocyte meiosis	43150	125/7469	0.0394631	0.10962	0.0692336	7531/7532	2
KEGG_Pathway_Module_10	hsa04210	Apoptosis	43150	136/7469	0.0459798	0.11495	0.0725997	7277/7846	2
KEGG_Pathway_Module_10	hsa04392	Hippo signaling pathway - multiple species	43119	29/7469	0.0713325	0.162119	0.102391	84962	1
KEGG_Pathway_Module_10	hsa05203	Viral carcinogenesis	43150	201/7469	0.0913604	0.18859	0.119109	7531/7532	2
KEGG_Pathway_Module_10	hsa00565	Ether lipid metabolism	43119	47/7469	0.113154	0.18859	0.119109	5048	1
KEGG_Pathway_Module_10	hsa03420	Nucleotide excision repair	43119	47/7469	0.113154	0.18859	0.119109	1069	1
KEGG_Pathway_Module_10	hsa04961	Endocrine and other factor-regulated calcium reabsorption	43119	47/7469	0.113154	0.18859	0.119109	8766	1
KEGG_Pathway_Module_10	hsa04144	Endocytosis	43150	244/7469	0.126419	0.197529	0.124755	4218/8766	2
KEGG_Pathway_Module_10	hsa05100	Bacterial invasion of epithelial cells	43119	74/7469	0.172555	0.253758	0.160268	4735	1
KEGG_Pathway_Module_10	hsa04512	ECM-receptor interaction	43119	82/7469	0.189419	0.260168	0.164317	3161	1
KEGG_Pathway_Module_10	hsa05132	Salmonella infection	43119	86/7469	0.197728	0.260168	0.164317	1778	1
KEGG_Pathway_Module_10	hsa05165	Human papillomavirus infection	43150	339/7469	0.212438	0.265548	0.167715	27175/7283	2
KEGG_Pathway_Module_10	hsa04151	PI3K-Akt signaling pathway	43150	354/7469	0.226664	0.269838	0.170424	7531/7532	2
KEGG_Pathway_Module_10	hsa04722	Neurotrophin signaling pathway	43119	119/7469	0.263265	0.288227	0.182038	7531	1
KEGG_Pathway_Module_10	hsa04152	AMPK signaling pathway	43119	120/7469	0.265169	0.288227	0.182038	4218	1
KEGG_Pathway_Module_10	hsa04068	FoxO signaling pathway	43119	132/7469	0.287662	0.296841	0.187478	10733	1
KEGG_Pathway_Module_10	hsa04910	Insulin signaling pathway	43119	137/7469	0.296841	0.296841	0.187478	5577	1
KEGG_Pathway_Module_11	hsa04610	Complement and coagulation cascades	23/52	79/7469	3.0607e-33	2.93827e-31	1.90086e-31	1191/1675/2/2153/2157/2159/2162/2165/2243/2244/2266/3053/462/5054/5104/5265/5340/5345/5624/5627/7056/710/7450	23
KEGG_Pathway_Module_11	hsa04933	AGE-RAGE signaling pathway in diabetic complications	10/52	99/7469	1.05306e-09	5.0547e-08	3.27004e-08	2335/5054/7040/7042/7043/7056/7422/7423/7424/2277	10
KEGG_Pathway_Module_11	hsa04510	Focal adhesion	12/52	199/7469	7.44788e-09	2.38332e-07	1.54184e-07	2335/3082/3479/5155/7057/7422/7423/7424/7450/81/87/2277	12
KEGG_Pathway_Module_11	hsa04151	PI3K-Akt signaling pathway	12/52	354/7469	3.94894e-06	8.26077e-05	5.34414e-05	2335/3082/3479/3481/5155/7057/7422/7423/7424/7450/9863/2277	12
KEGG_Pathway_Module_11	hsa04010	MAPK signaling pathway	11/52	295/7469	4.30248e-06	8.26077e-05	5.34414e-05	3082/3479/3481/5155/7040/7042/7043/7422/7423/7424/2277	11
KEGG_Pathway_Module_11	hsa05211	Renal cell carcinoma	6/52	69/7469	7.2638e-06	0.00011457	7.41187e-05	3082/5155/7040/7042/7043/7422	6
KEGG_Pathway_Module_11	hsa05205	Proteoglycans in cancer	9/52	201/7469	8.35406e-06	0.00011457	7.41187e-05	2335/3082/3479/3481/7040/7042/7057/7078/7422	9
KEGG_Pathway_Module_11	hsa04015	Rap1 signaling pathway	9/52	206/7469	1.01964e-05	0.000122356	7.9156e-05	3082/3479/5155/7057/7422/7423/7424/9863/2277	9
KEGG_Pathway_Module_11	hsa05144	Malaria	5/52	49/7469	2.03293e-05	0.000216846	0.000140284	3082/7040/7042/7043/7057	5
KEGG_Pathway_Module_11	hsa05146	Amoebiasis	6/52	96/7469	4.86868e-05	0.000467393	0.000302371	2335/7040/7042/7043/81/87	6
KEGG_Pathway_Module_11	hsa04014	Ras signaling pathway	8/52	232/7469	0.000177367	0.00154793	0.0010014	3082/3479/3481/5155/7422/7423/7424/2277	8
KEGG_Pathway_Module_11	hsa01521	EGFR tyrosine kinase inhibitor resistance	5/52	79/7469	0.000205272	0.00164217	0.00106237	2621/3082/3479/5155/7422	5
KEGG_Pathway_Module_11	hsa04350	TGF-beta signaling pathway	5/52	84/7469	0.000273906	0.00202269	0.00130854	7040/7042/7043/7044/7057	5
KEGG_Pathway_Module_11	hsa04066	HIF-1 signaling pathway	5/52	100/7469	0.000614253	0.00421202	0.00272488	226/3479/5054/7076/7422	5
KEGG_Pathway_Module_11	hsa04611	Platelet activation	5/52	123/7469	0.00156293	0.0100027	0.00647106	2243/2244/2266/7450/83706	5
KEGG_Pathway_Module_11	hsa05212	Pancreatic cancer	4/52	75/7469	0.0017635	0.010581	0.00684517	7040/7042/7043/7422	4
KEGG_Pathway_Module_11	hsa04926	Relaxin signaling pathway	5/52	130/7469	0.00199609	0.011272	0.00729222	7040/7422/7423/7424/2277	5
KEGG_Pathway_Module_11	hsa05410	Hypertrophic cardiomyopathy (HCM)	4/52	83/7469	0.00255937	0.0136499	0.00883056	3479/7040/7042/7043	4
KEGG_Pathway_Module_11	hsa05323	Rheumatoid arthritis	4/52	90/7469	0.00343379	0.0164822	0.0106628	7040/7042/7043/7422	4
KEGG_Pathway_Module_11	hsa05414	Dilated cardiomyopathy (DCM)	4/52	90/7469	0.00343379	0.0164822	0.0106628	3479/7040/7042/7043	4
KEGG_Pathway_Module_11	hsa05142	Chagas disease (American trypanosomiasis)	4/52	102/7469	0.00537173	0.0245565	0.0158863	5054/7040/7042/7043	4
KEGG_Pathway_Module_11	hsa05225	Hepatocellular carcinoma	5/52	168/7469	0.00600568	0.0262066	0.0169538	3082/3481/7040/7042/7043	5
KEGG_Pathway_Module_11	hsa05150	Staphylococcus aureus infection	3/52	56/7469	0.00680503	0.0284036	0.0183751	1675/2266/5340	3
KEGG_Pathway_Module_11	hsa05321	Inflammatory bowel disease (IBD)	3/52	65/7469	0.0102635	0.0410538	0.026559	7040/7042/7043	3
KEGG_Pathway_Module_11	hsa04068	FoxO signaling pathway	4/52	132/7469	0.0131123	0.0481603	0.0311563	3479/7040/7042/7043	4
KEGG_Pathway_Module_11	hsa04115	p53 signaling pathway	3/52	72/7469	0.0135451	0.0481603	0.0311563	3479/5054/7057	3
KEGG_Pathway_Module_11	hsa05218	Melanoma	3/52	72/7469	0.0135451	0.0481603	0.0311563	3082/3479/5155	3
KEGG_Pathway_Module_11	hsa05140	Leishmaniasis	3/52	74/7469	0.0145803	0.0499895	0.0323397	7040/7042/7043	3
KEGG_Pathway_Module_11	hsa05220	Chronic myeloid leukemia	3/52	76/7469	0.0156593	0.0504559	0.0326414	7040/7042/7043	3
KEGG_Pathway_Module_11	hsa04810	Regulation of actin cytoskeleton	5/52	213/7469	0.0157675	0.0504559	0.0326414	2335/5155/7114/81/87	5
KEGG_Pathway_Module_11	hsa04512	ECM-receptor interaction	3/52	82/7469	0.0191617	0.058902	0.0381054	2335/7057/7450	3
KEGG_Pathway_Module_11	hsa05226	Gastric cancer	4/52	149/7469	0.019634	0.058902	0.0381054	3082/7040/7042/7043	4
KEGG_Pathway_Module_11	hsa05210	Colorectal cancer	3/52	86/7469	0.0217189	0.0617634	0.0399566	7040/7042/7043	3
KEGG_Pathway_Module_11	hsa04390	Hippo signaling pathway	4/52	154/7469	0.0218745	0.0617634	0.0399566	5054/7040/7042/7043	4
KEGG_Pathway_Module_11	hsa04218	Cellular senescence	4/52	160/7469	0.0247634	0.0679226	0.0439411	5054/7040/7042/7043	4
KEGG_Pathway_Module_11	hsa05219	Bladder cancer	2/52	41/7469	0.0327958	0.0874555	0.0565776	7057/7422	2
KEGG_Pathway_Module_11	hsa05145	Toxoplasmosis	3/52	113/7469	0.0436295	0.113201	0.073233	7040/7042/7043	3
KEGG_Pathway_Module_11	hsa04060	Cytokine-cytokine receptor interaction	5/52	294/7469	0.0526405	0.132986	0.0860329	5196/5473/7040/7042/7043	5
KEGG_Pathway_Module_11	hsa04110	Cell cycle	3/52	124/7469	0.0548229	0.134036	0.0867116	7040/7042/7043	3
KEGG_Pathway_Module_11	hsa05206	MicroRNAs in cancer	5/52	299/7469	0.0558482	0.134036	0.0867116	5155/7042/7057/7078/7422	5
KEGG_Pathway_Module_11	hsa05418	Fluid shear stress and atherosclerosis	3/52	139/7469	0.0720779	0.168768	0.109181	5155/7056/7422	3
KEGG_Pathway_Module_11	hsa05161	Hepatitis B	3/52	144/7469	0.0783148	0.179005	0.115804	7040/7042/7043	3
KEGG_Pathway_Module_11	hsa05214	Glioma	2/52	71/7469	0.0872047	0.19469	0.12595	3479/5155	2
KEGG_Pathway_Module_11	hsa04520	Adherens junction	2/52	72/7469	0.0893092	0.194857	0.126058	81/87	2
KEGG_Pathway_Module_11	hsa05152	Tuberculosis	3/52	179/7469	0.12801	0.273088	0.176669	7040/7042/7043	3
KEGG_Pathway_Module_11	hsa05215	Prostate cancer	2/52	97/7469	0.146126	0.304959	0.197287	3479/5155	2
KEGG_Pathway_Module_11	hsa04670	Leukocyte transendothelial migration	2/52	112/7469	0.183047	0.373883	0.241876	81/87	2
KEGG_Pathway_Module_11	hsa00030	Pentose phosphate pathway	1/52	30/7469	0.189418	0.378837	0.245081	226	1
KEGG_Pathway_Module_11	hsa05166	Human T-cell leukemia virus 1 infection	3/52	219/7469	0.195101	0.382238	0.247281	7040/7042/7043	3
KEGG_Pathway_Module_11	hsa00051	Fructose and mannose metabolism	1/52	33/7469	0.2063	0.394041	0.254917	226	1
KEGG_Pathway_Module_11	hsa05165	Human papillomavirus infection	4/52	339/7469	0.209334	0.394041	0.254917	2335/7057/7422/7450	4
KEGG_Pathway_Module_11	hsa04380	Osteoclast differentiation	2/52	128/7469	0.223761	0.413098	0.267245	7040/7042	2
KEGG_Pathway_Module_11	hsa04960	Aldosterone-regulated sodium reabsorption	1/52	37/7469	0.228274	0.413478	0.267491	3479	1
KEGG_Pathway_Module_11	hsa05322	Systemic lupus erythematosus	2/52	133/7469	0.236653	0.420717	0.272174	81/87	2
KEGG_Pathway_Module_11	hsa04550	Signaling pathways regulating pluripotency of stem cells	2/52	139/7469	0.252182	0.440173	0.284761	3479/7044	2
KEGG_Pathway_Module_11	hsa04672	Intestinal immune network for IgA production	1/52	49/7469	0.290678	0.489349	0.316575	7040	1
KEGG_Pathway_Module_11	hsa04913	Ovarian steroidogenesis	1/52	49/7469	0.290678	0.489349	0.316575	3479	1
KEGG_Pathway_Module_11	hsa04979	Cholesterol metabolism	1/52	50/7469	0.295649	0.489349	0.316575	350	1
KEGG_Pathway_Module_11	hsa04530	Tight junction	2/52	170/7469	0.332384	0.540616	0.349741	81/87	2
KEGG_Pathway_Module_11	hsa04370	VEGF signaling pathway	1/52	59/7469	0.338877	0.540616	0.349741	7422	1
KEGG_Pathway_Module_11	hsa04730	Long-term depression	1/52	60/7469	0.343517	0.540616	0.349741	3479	1
KEGG_Pathway_Module_11	hsa04213	Longevity regulating pathway - multiple species	1/52	62/7469	0.3527	0.546116	0.353299	3479	1
KEGG_Pathway_Module_11	hsa05167	Kaposi sarcoma-associated herpesvirus infection	2/52	186/7469	0.373038	0.559163	0.361739	5155/7422	2
KEGG_Pathway_Module_11	hsa00010	Glycolysis / Gluconeogenesis	1/52	68/7469	0.379501	0.559163	0.361739	226	1
KEGG_Pathway_Module_11	hsa04062	Chemokine signaling pathway	2/52	189/7469	0.380563	0.559163	0.361739	5196/5473	2
KEGG_Pathway_Module_11	hsa05412	Arrhythmogenic right ventricular cardiomyopathy (ARVC)	1/52	72/7469	0.39676	0.559163	0.361739	88	1
KEGG_Pathway_Module_11	hsa04918	Thyroid hormone synthesis	1/52	74/7469	0.405212	0.559163	0.361739	213	1
KEGG_Pathway_Module_11	hsa05100	Bacterial invasion of epithelial cells	1/52	74/7469	0.405212	0.559163	0.361739	2335	1
KEGG_Pathway_Module_11	hsa01230	Biosynthesis of amino acids	1/52	75/7469	0.409394	0.559163	0.361739	226	1
KEGG_Pathway_Module_11	hsa05203	Viral carcinogenesis	2/52	201/7469	0.410287	0.559163	0.361739	81/87	2
KEGG_Pathway_Module_11	hsa05133	Pertussis	1/52	76/7469	0.413548	0.559163	0.361739	710	1
KEGG_Pathway_Module_11	hsa04540	Gap junction	1/52	88/7469	0.46121	0.611515	0.395607	5155	1
KEGG_Pathway_Module_11	hsa04211	Longevity regulating pathway	1/52	89/7469	0.465006	0.611515	0.395607	3479	1
KEGG_Pathway_Module_11	hsa05222	Small cell lung cancer	1/52	93/7469	0.479929	0.617293	0.399345	2335	1
KEGG_Pathway_Module_11	hsa01522	Endocrine resistance	1/52	98/7469	0.498009	0.617293	0.399345	3479	1
KEGG_Pathway_Module_11	hsa04750	Inflammatory mediator regulation of TRP channels	1/52	99/7469	0.501551	0.617293	0.399345	3479	1
KEGG_Pathway_Module_11	hsa04914	Progesterone-mediated oocyte maturation	1/52	99/7469	0.501551	0.617293	0.399345	3479	1
KEGG_Pathway_Module_11	hsa05231	Choline metabolism in cancer	1/52	99/7469	0.501551	0.617293	0.399345	5155	1
KEGG_Pathway_Module_11	hsa04659	Th17 cell differentiation	1/52	107/7469	0.529013	0.642852	0.41588	7040	1
KEGG_Pathway_Module_11	hsa04668	TNF signaling pathway	1/52	110/7469	0.538925	0.646709	0.418376	7424	1
KEGG_Pathway_Module_11	hsa01200	Carbon metabolism	1/52	116/7469	0.558137	0.661496	0.427941	226	1
KEGG_Pathway_Module_11	hsa04152	AMPK signaling pathway	1/52	120/7469	0.570507	0.667911	0.432091	3479	1
KEGG_Pathway_Module_11	hsa04142	Lysosome	1/52	123/7469	0.579561	0.669134	0.432883	1521	1
KEGG_Pathway_Module_11	hsa04114	Oocyte meiosis	1/52	125/7469	0.585492	0.669134	0.432883	3479	1
KEGG_Pathway_Module_11	hsa04210	Apoptosis	1/52	136/7469	0.616679	0.69142	0.4473	1521	1
KEGG_Pathway_Module_11	hsa04371	Apelin signaling pathway	1/52	137/7469	0.619397	0.69142	0.4473	5054	1
KEGG_Pathway_Module_11	hsa04072	Phospholipase D signaling pathway	1/52	146/7469	0.643025	0.694124	0.44905	5155	1
KEGG_Pathway_Module_11	hsa05224	Breast cancer	1/52	147/7469	0.64556	0.694124	0.44905	3479	1
KEGG_Pathway_Module_11	hsa04932	Non-alcoholic fatty liver disease (NAFLD)	1/52	149/7469	0.650577	0.694124	0.44905	7040	1
KEGG_Pathway_Module_11	hsa04150	mTOR signaling pathway	1/52	151/7469	0.655524	0.694124	0.44905	3479	1
KEGG_Pathway_Module_11	hsa04145	Phagosome	1/52	152/7469	0.657972	0.694124	0.44905	7057	1
KEGG_Pathway_Module_11	hsa04630	JAK-STAT signaling pathway	1/52	162/7469	0.68153	0.711162	0.460072	5155	1
KEGG_Pathway_Module_11	hsa05164	Influenza A	1/52	171/7469	0.701367	0.723992	0.468372	5340	1
KEGG_Pathway_Module_11	hsa05202	Transcriptional misregulation in cancer	1/52	186/7469	0.731768	0.747338	0.483475	3479	1
KEGG_Pathway_Module_11	hsa05163	Human cytomegalovirus infection	1/52	225/7469	0.797313	0.805706	0.521235	7422	1
KEGG_Pathway_Module_11	hsa04080	Neuroactive ligand-receptor interaction	1/52	277/7469	0.860828	0.860828	0.556895	5340	1
KEGG_Pathway_Module_12	hsa00140	Steroid hormone biosynthesis	46/66	60/7469	2.90475e-91	1.22e-89	7.03256e-90	10720/1109/1543/1544/1551/1571/1576/1577/1584/1585/1586/1588/1589/1645/3283/3284/3290/3291/3292/3293/3294/51144/51478/54575/54576/54577/54578/54579/54600/54657/54658/54659/574537/6715/6718/6783/7363/7364/7365/7366/7367/7923/79644/79799/8630/8644	46
KEGG_Pathway_Module_12	hsa00830	Retinol metabolism	36/66	67/7469	8.60542e-61	1.80714e-59	1.04171e-59	10720/1543/1544/1548/1551/1555/1558/1559/1562/1576/1577/1579/1592/216/29785/316/340665/54575/54576/54577/54578/54579/54600/54657/54658/54659/56603/574537/7363/7364/7365/7366/7367/79799/8630/8854	36
KEGG_Pathway_Module_12	hsa00980	Metabolism of xenobiotics by cytochrome P450	31/66	76/7469	7.42389e-47	1.03934e-45	5.99121e-46	10720/1543/1544/1548/1553/1555/1559/1565/1571/1576/1577/1645/29785/3290/54575/54576/54577/54578/54579/54600/54657/54658/54659/574537/7363/7364/7365/7366/7367/79799/874	31
KEGG_Pathway_Module_12	hsa05204	Chemical carcinogenesis	29/66	82/7469	1.92506e-41	2.02131e-40	1.16517e-40	10720/1543/1544/1548/1551/1553/1558/1559/1562/1571/1576/1577/3290/54575/54576/54577/54578/54579/54600/54657/54658/54659/574537/7363/7364/7365/7366/7367/79799	29
KEGG_Pathway_Module_12	hsa00982	Drug metabolism - cytochrome P450	27/66	72/7469	2.76413e-39	2.32187e-38	1.33842e-38	10720/1544/1548/1555/1558/1559/1565/1571/1576/1577/316/54575/54576/54577/54578/54579/54600/54657/54658/54659/574537/7363/7364/7365/7366/7367/79799	27
KEGG_Pathway_Module_12	hsa00053	Ascorbate and aldarate metabolism	18/66	27/7469	3.79389e-32	2.65572e-31	1.53087e-31	10720/54575/54576/54577/54578/54579/54600/54657/54658/54659/574537/7358/7363/7364/7365/7366/7367/79799	18
KEGG_Pathway_Module_12	hsa00040	Pentose and glucuronate interconversions	19/66	34/7469	9.34438e-32	5.60663e-31	3.23189e-31	10720/54575/54576/54577/54578/54579/54600/54657/54658/54659/574537/7358/7363/7364/7365/7366/7367/79799/9365	19
KEGG_Pathway_Module_12	hsa00983	Drug metabolism - other enzymes	21/66	79/7469	1.14213e-26	5.99619e-26	3.45645e-26	1066/10720/1548/1571/1576/54575/54576/54577/54578/54579/54600/54657/54658/54659/574537/7363/7364/7365/7366/7367/79799	21
KEGG_Pathway_Module_12	hsa00860	Porphyrin and chlorophyll metabolism	17/66	42/7469	2.8344e-25	1.32272e-24	7.62471e-25	10720/54575/54576/54577/54578/54579/54600/54657/54658/54659/574537/7363/7364/7365/7366/7367/79799	17
KEGG_Pathway_Module_12	hsa04913	Ovarian steroidogenesis	9/66	49/7469	2.90782e-10	1.22128e-09	7.03999e-10	1543/1586/1588/3283/3284/3292/3294/51478/8644	9
KEGG_Pathway_Module_12	hsa00590	Arachidonic acid metabolism	7/66	63/7469	1.13843e-06	4.34672e-06	2.50563e-06	1555/1558/1559/1571/1579/8644/874	7
KEGG_Pathway_Module_12	hsa00591	Linoleic acid metabolism	5/66	29/7469	4.65726e-06	1.63004e-05	9.39623e-06	1544/1558/1559/1571/1576	5
KEGG_Pathway_Module_12	hsa04927	Cortisol synthesis and secretion	5/66	64/7469	0.000235611	0.000761206	0.00043879	1584/1586/1589/3283/3284	5
KEGG_Pathway_Module_12	hsa00232	Caffeine metabolism	2/66	5/7469	0.000756013	0.00226804	0.00130739	1544/1548	2
KEGG_Pathway_Module_12	hsa00380	Tryptophan metabolism	3/66	40/7469	0.00515663	0.0144386	0.00832298	1543/1544/316	3
KEGG_Pathway_Module_12	hsa00120	Primary bile acid biosynthesis	2/66	17/7469	0.00960202	0.0248511	0.0143252	1109/6718	2
KEGG_Pathway_Module_12	hsa04925	Aldosterone synthesis and secretion	4/66	96/7469	0.0100588	0.0248511	0.0143252	1585/1589/3283/3284	4
KEGG_Pathway_Module_12	hsa04934	Cushing syndrome	5/66	154/7469	0.0113672	0.0265235	0.0152893	1584/1586/1589/3283/3284	5
KEGG_Pathway_Module_12	hsa04726	Serotonergic synapse	4/66	115/7469	0.0184892	0.0408708	0.0235596	1558/1559/1562/1565	4
KEGG_Pathway_Module_12	hsa00750	Vitamin B6 metabolism	1/66	6/7469	0.0518786	0.108945	0.0628004	316	1
KEGG_Pathway_Module_12	hsa00520	Amino sugar and nucleotide sugar metabolism	2/66	48/7469	0.0669052	0.13381	0.0771338	7358/80146	2
KEGG_Pathway_Module_12	hsa04976	Bile secretion	2/66	71/7469	0.129827	0.247851	0.142871	1576/7363	2
KEGG_Pathway_Module_12	hsa00100	Steroid biosynthesis	1/66	19/7469	0.15536	0.283701	0.163537	51478	1
KEGG_Pathway_Module_12	hsa00790	Folate biosynthesis	1/66	26/7469	0.206387	0.358553	0.206685	8644	1
KEGG_Pathway_Module_12	hsa01040	Biosynthesis of unsaturated fatty acids	1/66	27/7469	0.213424	0.358553	0.206685	51144	1
KEGG_Pathway_Module_12	hsa00062	Fatty acid elongation	1/66	30/7469	0.23417	0.364264	0.209977	51144	1
KEGG_Pathway_Module_12	hsa00760	Nicotinate and nicotinamide metabolism	1/66	30/7469	0.23417	0.364264	0.209977	316	1
KEGG_Pathway_Module_12	hsa00350	Tyrosine metabolism	1/66	36/7469	0.274057	0.406245	0.234176	316	1
KEGG_Pathway_Module_12	hsa04960	Aldosterone-regulated sodium reabsorption	1/66	37/7469	0.280502	0.406245	0.234176	3291	1
KEGG_Pathway_Module_12	hsa00071	Fatty acid degradation	1/66	44/7469	0.324072	0.442643	0.255158	1579	1
KEGG_Pathway_Module_12	hsa04961	Endocrine and other factor-regulated calcium reabsorption	1/66	47/7469	0.341939	0.442643	0.255158	9365	1
KEGG_Pathway_Module_12	hsa00280	Valine, leucine and isoleucine degradation	1/66	48/7469	0.347791	0.442643	0.255158	316	1
KEGG_Pathway_Module_12	hsa01212	Fatty acid metabolism	1/66	48/7469	0.347791	0.442643	0.255158	51144	1
KEGG_Pathway_Module_12	hsa04917	Prolactin signaling pathway	1/66	70/7469	0.464314	0.573564	0.330626	1586	1
KEGG_Pathway_Module_12	hsa03320	PPAR signaling pathway	1/66	74/7469	0.483177	0.579812	0.334228	1579	1
KEGG_Pathway_Module_12	hsa04211	Longevity regulating pathway	1/66	89/7469	0.548264	0.639642	0.368716	9365	1
KEGG_Pathway_Module_12	hsa01522	Endocrine resistance	1/66	98/7469	0.583368	0.648898	0.374052	1565	1
KEGG_Pathway_Module_12	hsa04750	Inflammatory mediator regulation of TRP channels	1/66	99/7469	0.587098	0.648898	0.374052	1579	1
KEGG_Pathway_Module_12	hsa04928	Parathyroid hormone synthesis, secretion and action	1/66	106/7469	0.612307	0.659407	0.380109	9365	1
KEGG_Pathway_Module_12	hsa04270	Vascular smooth muscle contraction	1/66	121/7469	0.661331	0.694398	0.400279	1579	1
KEGG_Pathway_Module_12	hsa04932	Non-alcoholic fatty liver disease (NAFLD)	1/66	149/7469	0.737061	0.755038	0.435235	1571	1
KEGG_Pathway_Module_12	hsa04630	JAK-STAT signaling pathway	1/66	162/7469	0.76629	0.76629	0.441721	316	1
KEGG_Pathway_Module_13	hsa03008	Ribosome biogenesis in eukaryotes	32/47	105/7469	1.91332e-50	2.10465e-49	1.81262e-49	10171/10199/10528/10556/10557/10607/10813/10885/134430/1736/2091/22803/23160/27341/28987/51077/51096/51602/54913/55127/55272/55781/55813/5822/65083/83732/84128/84135/92856/9724/9790/84916	32
KEGG_Pathway_Module_13	hsa03018	RNA degradation	14/47	79/7469	1.70306e-17	9.36682e-17	8.06712e-17	10200/10438/11340/118460/22803/23016/23404/5073/51010/51013/5393/5394/54512/56915	14
KEGG_Pathway_Module_13	hsa03013	RNA transport	3/47	171/7469	0.0920867	0.337651	0.2908	10556/10557/54913	3
KEGG_Pathway_Module_13	hsa04392	Hippo signaling pathway - multiple species	1/47	29/7469	0.167573	0.391726	0.337372	1454	1
KEGG_Pathway_Module_13	hsa04710	Circadian rhythm	1/47	31/7469	0.178057	0.391726	0.337372	1454	1
KEGG_Pathway_Module_13	hsa04340	Hedgehog signaling pathway	1/47	47/7469	0.25741	0.471918	0.406436	1454	1
KEGG_Pathway_Module_13	hsa04068	FoxO signaling pathway	1/47	132/7469	0.568581	0.754165	0.64952	1454	1
KEGG_Pathway_Module_13	hsa04310	Wnt signaling pathway	1/47	149/7469	0.613277	0.754165	0.64952	1454	1
KEGG_Pathway_Module_13	hsa04390	Hippo signaling pathway	1/47	154/7469	0.625537	0.754165	0.64952	1454	1
KEGG_Pathway_Module_13	hsa05167	Kaposi sarcoma-associated herpesvirus infection	1/47	186/7469	0.695465	0.754165	0.64952	7538	1
KEGG_Pathway_Module_13	hsa05166	Human T-cell leukemia virus 1 infection	1/47	219/7469	0.754165	0.754165	0.64952	7538	1
KEGG_Pathway_Module_14	hsa00480	Glutathione metabolism	34/57	56/7469	6.90459e-63	2.76184e-61	1.38092e-61	119391/124975/221357/257202/2678/2686/2687/27306/2876/2877/2878/2879/2880/2882/2936/2937/2938/2939/2940/2941/2944/2946/2947/2948/2949/2950/2952/373156/4257/4258/4259/493869/653689/9446	34
KEGG_Pathway_Module_14	hsa00980	Metabolism of xenobiotics by cytochrome P450	35/57	76/7469	5.1614e-59	1.03228e-57	5.1614e-58	119391/124/125/127/128/130/131/1545/1553/1571/1572/2052/218/220/221357/222/27306/2938/2939/2940/2941/2944/2946/2947/2948/2949/2950/2952/29785/373156/4257/4258/4259/653689/9446	35
KEGG_Pathway_Module_14	hsa05204	Chemical carcinogenesis	34/57	82/7469	3.86384e-55	5.15178e-54	2.57589e-54	119391/124/125/127/128/130/131/1545/1553/1557/1571/2052/218/220/221357/222/27306/2938/2939/2940/2941/2944/2946/2947/2948/2949/2950/2952/373156/4257/4258/4259/653689/9446	34
KEGG_Pathway_Module_14	hsa00982	Drug metabolism - cytochrome P450	31/57	72/7469	1.75814e-50	1.75814e-49	8.79072e-50	119391/124/125/127/128/130/131/1557/1571/218/220/221357/222/27306/2938/2939/2940/2941/2944/2946/2947/2948/2949/2950/2952/373156/4257/4258/4259/653689/9446	31
KEGG_Pathway_Module_14	hsa00983	Drug metabolism - other enzymes	19/57	79/7469	1.33829e-24	1.07063e-23	5.35314e-24	119391/1571/221357/2938/2939/2940/2941/2944/2946/2947/2948/2949/2950/2952/4257/4258/4259/653689/9446	19
KEGG_Pathway_Module_14	hsa01524	Platinum drug resistance	18/57	73/7469	1.62005e-23	1.08003e-22	5.40017e-23	119391/221357/2938/2939/2940/2941/2944/2946/2947/2948/2949/2950/2952/4257/4258/4259/653689/9446	18
KEGG_Pathway_Module_14	hsa05418	Fluid shear stress and atherosclerosis	18/57	139/7469	3.92443e-18	2.24253e-17	1.12127e-17	119391/221357/2938/2939/2940/2941/2944/2946/2947/2948/2949/2950/2952/4257/4258/4259/653689/9446	18
KEGG_Pathway_Module_14	hsa05225	Hepatocellular carcinoma	18/57	168/7469	1.26167e-16	6.30837e-16	3.15418e-16	119391/221357/2938/2939/2940/2941/2944/2946/2947/2948/2949/2950/2952/4257/4258/4259/653689/9446	18
KEGG_Pathway_Module_14	hsa00590	Arachidonic acid metabolism	12/57	63/7469	2.27442e-14	1.01085e-13	5.05427e-14	1557/1571/257202/2678/2687/27306/2876/2877/2878/2880/2882/493869	12
KEGG_Pathway_Module_14	hsa00350	Tyrosine metabolism	9/57	36/7469	3.64922e-12	1.45969e-11	7.29843e-12	124/125/127/128/130/131/218/220/222	9
KEGG_Pathway_Module_14	hsa00830	Retinol metabolism	10/57	67/7469	5.21201e-11	1.89528e-10	9.47639e-11	124/125/127/128/130/131/29785/54884/9227/53630	10
KEGG_Pathway_Module_14	hsa00010	Glycolysis / Gluconeogenesis	9/57	68/7469	1.58547e-09	5.28489e-09	2.64245e-09	124/125/127/128/130/131/218/220/222	9
KEGG_Pathway_Module_14	hsa00430	Taurine and hypotaurine metabolism	5/57	11/7469	9.65687e-09	2.97134e-08	1.48567e-08	124975/2678/2686/2687/51380	5
KEGG_Pathway_Module_14	hsa04918	Thyroid hormone synthesis	8/57	74/7469	7.06733e-08	2.01924e-07	1.00962e-07	257202/2876/2877/2878/2880/2882/2936/493869	8
KEGG_Pathway_Module_14	hsa00071	Fatty acid degradation	6/57	44/7469	8.51541e-07	2.27078e-06	1.13539e-06	124/125/127/128/130/131	6
KEGG_Pathway_Module_14	hsa00360	Phenylalanine metabolism	3/57	17/7469	0.000265647	0.000664118	0.000332059	218/220/222	3
KEGG_Pathway_Module_14	hsa00340	Histidine metabolism	3/57	23/7469	0.000669735	0.00157585	0.000787923	218/220/222	3
KEGG_Pathway_Module_14	hsa00410	beta-Alanine metabolism	3/57	31/7469	0.00162792	0.0036176	0.0018088	218/220/222	3
KEGG_Pathway_Module_14	hsa00591	Linoleic acid metabolism	2/57	29/7469	0.0203608	0.0428648	0.0214324	1557/1571	2
KEGG_Pathway_Module_14	hsa04146	Peroxisome	3/57	83/7469	0.0251824	0.0503648	0.0251824	373156/6647/6648	3
KEGG_Pathway_Module_14	hsa04216	Ferroptosis	2/57	40/7469	0.0370891	0.0706459	0.035323	2879/2937	2
KEGG_Pathway_Module_14	hsa05014	Amyotrophic lateral sclerosis (ALS)	2/57	51/7469	0.0575027	0.10455	0.0522751	2876/6647	2
KEGG_Pathway_Module_14	hsa00140	Steroid hormone biosynthesis	2/57	60/7469	0.0764648	0.132982	0.0664911	1545/1571	2
KEGG_Pathway_Module_14	hsa04213	Longevity regulating pathway - multiple species	2/57	62/7469	0.080917	0.134862	0.0674309	6647/6648	2
KEGG_Pathway_Module_14	hsa04977	Vitamin digestion and absorption	1/57	24/7469	0.168184	0.269095	0.134547	9227	1
KEGG_Pathway_Module_14	hsa00790	Folate biosynthesis	1/57	26/7469	0.180873	0.269779	0.13489	8836	1
KEGG_Pathway_Module_14	hsa05016	Huntington disease	3/57	193/7469	0.182101	0.269779	0.13489	2876/6647/6648	3
KEGG_Pathway_Module_14	hsa01523	Antifolate resistance	1/57	31/7469	0.21177	0.302528	0.151264	8836	1
KEGG_Pathway_Module_14	hsa05020	Prion diseases	1/57	35/7469	0.23566	0.325049	0.162524	6647	1
KEGG_Pathway_Module_14	hsa00380	Tryptophan metabolism	1/57	40/7469	0.264525	0.3527	0.17635	1545	1
KEGG_Pathway_Module_14	hsa00270	Cysteine and methionine metabolism	1/57	47/7469	0.303144	0.391153	0.195577	2937	1
KEGG_Pathway_Module_14	hsa04913	Ovarian steroidogenesis	1/57	49/7469	0.313807	0.392258	0.196129	1545	1
KEGG_Pathway_Module_14	hsa04976	Bile secretion	1/57	71/7469	0.421023	0.510331	0.255165	2052	1
KEGG_Pathway_Module_14	hsa04211	Longevity regulating pathway	1/57	89/7469	0.496351	0.583943	0.291971	6648	1
KEGG_Pathway_Module_14	hsa05215	Prostate cancer	1/57	97/7469	0.526657	0.601894	0.300947	2950	1
KEGG_Pathway_Module_14	hsa04726	Serotonergic synapse	1/57	115/7469	0.588445	0.639605	0.319803	1557	1
KEGG_Pathway_Module_14	hsa01200	Carbon metabolism	1/57	116/7469	0.591635	0.639605	0.319803	128	1
KEGG_Pathway_Module_14	hsa04068	FoxO signaling pathway	1/57	132/7469	0.63949	0.673147	0.336574	6648	1
KEGG_Pathway_Module_14	hsa04932	Non-alcoholic fatty liver disease (NAFLD)	1/57	149/7469	0.684301	0.701848	0.350924	1571	1
KEGG_Pathway_Module_14	hsa05206	MicroRNAs in cancer	1/57	299/7469	0.903452	0.903452	0.451726	1545	1
KEGG_Pathway_Module_15	hsa04726	Serotonergic synapse	24/52	115/7469	7.56804e-31	3.63266e-29	1.83226e-29	10681/2775/2783/2784/2785/2786/2787/2788/2790/2791/2792/2793/3360/3362/3363/3760/3762/3763/3765/51764/54331/55970/59345/94235	24
KEGG_Pathway_Module_15	hsa04713	Circadian entrainment	22/52	96/7469	3.85552e-29	9.25324e-28	4.66721e-28	10681/117/2775/2783/2784/2785/2786/2787/2788/2790/2791/2792/2793/3760/3762/3763/3765/51764/54331/55970/59345/94235	22
KEGG_Pathway_Module_15	hsa05032	Morphine addiction	21/52	91/7469	7.72748e-28	1.2364e-26	6.23621e-27	10681/2775/2783/2784/2785/2786/2787/2788/2790/2791/2792/2793/3760/3762/3763/3765/51764/54331/55970/59345/94235	21
KEGG_Pathway_Module_15	hsa04725	Cholinergic synapse	22/52	112/7469	1.60579e-27	1.92695e-26	9.71928e-27	10681/2775/2783/2784/2785/2786/2787/2788/2790/2791/2792/2793/3759/3760/3761/3763/3768/51764/54331/55970/59345/94235	22
KEGG_Pathway_Module_15	hsa04728	Dopaminergic synapse	22/52	131/7469	6.58206e-26	6.31878e-25	3.1871e-25	10681/1816/2775/2783/2784/2785/2786/2787/2788/2790/2791/2792/2793/3760/3762/3763/3765/51764/54331/55970/59345/94235	22
KEGG_Pathway_Module_15	hsa04723	Retrograde endocannabinoid signaling	21/52	148/7469	4.61754e-23	3.69403e-22	1.86322e-22	10681/2775/2783/2784/2785/2786/2787/2788/2790/2791/2792/2793/3760/3762/3763/3765/51764/54331/55970/59345/94235	21
KEGG_Pathway_Module_15	hsa04727	GABAergic synapse	18/52	88/7469	9.50575e-23	6.51823e-22	3.2877e-22	10681/2775/2783/2784/2785/2786/2787/2788/2790/2791/2792/2793/3763/51764/54331/55970/59345/94235	18
KEGG_Pathway_Module_15	hsa04724	Glutamatergic synapse	19/52	114/7469	3.29024e-22	1.97414e-21	9.95729e-22	10681/2775/2783/2784/2785/2786/2787/2788/2790/2791/2792/2793/2899/3760/51764/54331/55970/59345/94235	19
KEGG_Pathway_Module_15	hsa05034	Alcoholism	19/52	180/7469	2.66606e-18	1.4219e-17	7.17186e-18	10681/135/136/2775/2783/2784/2785/2786/2787/2788/2790/2791/2792/2793/51764/54331/55970/59345/94235	19
KEGG_Pathway_Module_15	hsa04926	Relaxin signaling pathway	17/52	130/7469	5.57684e-18	2.67688e-17	1.35018e-17	10681/2775/2783/2784/2785/2786/2787/2788/2790/2791/2792/2793/51764/54331/55970/59345/94235	17
KEGG_Pathway_Module_15	hsa04371	Apelin signaling pathway	16/52	137/7469	3.99153e-16	1.74176e-15	8.78519e-16	10681/2783/2784/2785/2786/2787/2788/2790/2791/2792/2793/51764/54331/55970/59345/94235	16
KEGG_Pathway_Module_15	hsa05163	Human cytomegalovirus infection	18/52	225/7469	3.64882e-15	1.45953e-14	7.36165e-15	10681/2775/2783/2784/2785/2786/2787/2788/2790/2791/2792/2793/51764/54331/55970/5732/59345/94235	18
KEGG_Pathway_Module_15	hsa04080	Neuroactive ligand-receptor interaction	19/52	277/7469	8.99349e-15	3.32067e-14	1.6749e-14	10888/117/134864/135/136/153/1816/2899/319100/3360/3362/3363/4159/4160/554/5732/83551/9038/9287	19
KEGG_Pathway_Module_15	hsa05170	Human immunodeficiency virus 1 infection	17/52	212/7469	2.42496e-14	8.31414e-14	4.19354e-14	10681/2775/2783/2784/2785/2786/2787/2788/2790/2791/2792/2793/51764/54331/55970/59345/94235	17
KEGG_Pathway_Module_15	hsa05167	Kaposi sarcoma-associated herpesvirus infection	16/52	186/7469	5.4273e-14	1.73674e-13	8.75985e-14	10681/2783/2784/2785/2786/2787/2788/2790/2791/2792/2793/51764/54331/55970/59345/94235	16
KEGG_Pathway_Module_15	hsa04062	Chemokine signaling pathway	16/52	189/7469	6.98914e-14	2.09674e-13	1.05757e-13	10681/2783/2784/2785/2786/2787/2788/2790/2791/2792/2793/51764/54331/55970/59345/94235	16
KEGG_Pathway_Module_15	hsa04014	Ras signaling pathway	17/52	232/7469	1.08654e-13	3.06788e-13	1.5474e-13	10681/2783/2784/2785/2786/2787/2788/2790/2791/2792/2793/3363/51764/54331/55970/59345/94235	17
KEGG_Pathway_Module_15	hsa04744	Phototransduction	7/52	28/7469	5.52482e-10	1.47329e-09	7.43105e-10	2779/2780/2792/5145/5148/5158/6010	7
KEGG_Pathway_Module_15	hsa04151	PI3K-Akt signaling pathway	16/52	354/7469	1.00781e-09	2.54603e-09	1.28418e-09	10681/2783/2784/2785/2786/2787/2788/2790/2791/2792/2793/51764/54331/55970/59345/94235	16
KEGG_Pathway_Module_15	hsa04921	Oxytocin signaling pathway	8/52	152/7469	8.62098e-06	2.06903e-05	1.04359e-05	2775/3759/3760/3761/3762/3763/3765/3768	8
KEGG_Pathway_Module_15	hsa04020	Calcium signaling pathway	7/52	183/7469	0.000248944	0.000569015	0.000287003	135/136/153/1816/3360/3362/3363	7
KEGG_Pathway_Module_15	hsa04024	cAMP signaling pathway	7/52	199/7469	0.000415038	0.000905537	0.00045674	117/135/153/1816/3360/3362/5732	7
KEGG_Pathway_Module_15	hsa04924	Renin secretion	4/52	65/7469	0.00103391	0.00215772	0.00108832	117/153/3759/5732	4
KEGG_Pathway_Module_15	hsa04971	Gastric acid secretion	4/52	75/7469	0.0017635	0.003527	0.00177897	3759/3766/3772/3773	4
KEGG_Pathway_Module_15	hsa04915	Estrogen signaling pathway	5/52	137/7469	0.00251144	0.00482197	0.00243213	2775/3760/3762/3763/3765	5
KEGG_Pathway_Module_15	hsa04742	Taste transduction	2/52	83/7469	0.113398	0.209351	0.105594	2784/51764	2
KEGG_Pathway_Module_15	hsa00230	Purine metabolism	3/52	174/7469	0.12032	0.213902	0.107889	5145/5148/5158	3
KEGG_Pathway_Module_15	hsa04015	Rap1 signaling pathway	3/52	206/7469	0.172338	0.295437	0.149014	135/136/2775	3
KEGG_Pathway_Module_15	hsa04270	Vascular smooth muscle contraction	2/52	121/7469	0.205827	0.340678	0.171833	135/136	2
KEGG_Pathway_Module_15	hsa04962	Vasopressin-regulated water reabsorption	1/52	44/7469	0.265302	0.424483	0.214103	554	1
KEGG_Pathway_Module_15	hsa04923	Regulation of lipolysis in adipocytes	1/52	54/7469	0.315193	0.488041	0.246161	153	1
KEGG_Pathway_Module_15	hsa04730	Long-term depression	1/52	60/7469	0.343517	0.515275	0.259897	2775	1
KEGG_Pathway_Module_15	hsa04911	Insulin secretion	1/52	85/7469	0.449664	0.614434	0.309912	117	1
KEGG_Pathway_Module_15	hsa04540	Gap junction	1/52	88/7469	0.46121	0.614434	0.309912	153	1
KEGG_Pathway_Module_15	hsa04970	Salivary secretion	1/52	90/7469	0.468776	0.614434	0.309912	153	1
KEGG_Pathway_Module_15	hsa05414	Dilated cardiomyopathy (DCM)	1/52	90/7469	0.468776	0.614434	0.309912	153	1
KEGG_Pathway_Module_15	hsa04925	Aldosterone synthesis and secretion	1/52	96/7469	0.490852	0.614434	0.309912	3762	1
KEGG_Pathway_Module_15	hsa04750	Inflammatory mediator regulation of TRP channels	1/52	99/7469	0.501551	0.614434	0.309912	5732	1
KEGG_Pathway_Module_15	hsa04916	Melanogenesis	1/52	101/7469	0.50856	0.614434	0.309912	2775	1
KEGG_Pathway_Module_15	hsa05142	Chagas disease (American trypanosomiasis)	1/52	102/7469	0.512029	0.614434	0.309912	2775	1
KEGG_Pathway_Module_15	hsa05145	Toxoplasmosis	1/52	113/7469	0.548631	0.6423	0.323967	2775	1
KEGG_Pathway_Module_15	hsa05012	Parkinson disease	1/52	142/7469	0.632707	0.701482	0.353818	135	1
KEGG_Pathway_Module_15	hsa04261	Adrenergic signaling in cardiomyocytes	1/52	144/7469	0.637902	0.701482	0.353818	153	1
KEGG_Pathway_Module_15	hsa04072	Phospholipase D signaling pathway	1/52	146/7469	0.643025	0.701482	0.353818	554	1
KEGG_Pathway_Module_15	hsa04022	cGMP-PKG signaling pathway	1/52	163/7469	0.683797	0.729383	0.367891	153	1
KEGG_Pathway_Module_15	hsa04810	Regulation of actin cytoskeleton	1/52	213/7469	0.779028	0.812899	0.410015	55970	1
KEGG_Pathway_Module_15	hsa04740	Olfactory transduction	2/52	448/7469	0.827862	0.845476	0.426446	2788/51764	2
KEGG_Pathway_Module_15	hsa04010	MAPK signaling pathway	1/52	295/7469	0.877888	0.877888	0.442794	55970	1
KEGG_Pathway_Module_16	hsa05322	Systemic lupus erythematosus	27/41	133/7469	1.04312e-38	4.27679e-37	3.95288e-37	128312/221613/255626/3013/3014/3015/3017/3018/317772/333932/474382/55766/8331/8334/8337/8338/8340/8341/8342/8345/8348/8349/85235/85236/8970/92815/94239	27
KEGG_Pathway_Module_16	hsa05034	Alcoholism	28/41	180/7469	7.75149e-37	1.58906e-35	1.4687e-35	128312/221613/255626/3013/3014/3015/3017/3018/3065/317772/333932/474382/55766/8331/8334/8337/8338/8340/8341/8342/8345/8348/8349/85235/85236/8970/92815/94239	28
KEGG_Pathway_Module_16	hsa04217	Necroptosis	14/41	162/7469	6.15768e-14	8.4155e-13	7.77813e-13	221613/3013/3014/3015/317772/474382/55766/8331/8334/8337/8338/85235/92815/94239	14
KEGG_Pathway_Module_16	hsa05203	Viral carcinogenesis	13/41	201/7469	2.39579e-11	2.45569e-10	2.2697e-10	128312/255626/3017/3018/3065/8340/8341/8342/8345/8348/8349/85236/8970	13
KEGG_Pathway_Module_16	hsa04934	Cushing syndrome	4/41	154/7469	0.00973311	0.0798115	0.0737667	11091/4221/5929/6934	4
KEGG_Pathway_Module_16	hsa05202	Transcriptional misregulation in cancer	3/41	186/7469	0.0813517	0.555904	0.5138	3065/333932/4221	3
KEGG_Pathway_Module_16	hsa05215	Prostate cancer	2/41	97/7469	0.098824	0.578826	0.534987	354/6934	2
KEGG_Pathway_Module_16	hsa04614	Renin-angiotensin system	1/41	23/7469	0.119082	0.610293	0.564071	3817	1
KEGG_Pathway_Module_16	hsa05216	Thyroid cancer	1/41	37/7469	0.184668	0.611891	0.565547	6934	1
KEGG_Pathway_Module_16	hsa04310	Wnt signaling pathway	2/41	149/7469	0.196777	0.611891	0.565547	6934/8607	2
KEGG_Pathway_Module_16	hsa03440	Homologous recombination	1/41	41/7469	0.202515	0.611891	0.565547	79184	1
KEGG_Pathway_Module_16	hsa04961	Endocrine and other factor-regulated calcium reabsorption	1/41	47/7469	0.228573	0.611891	0.565547	3817	1
KEGG_Pathway_Module_16	hsa04330	Notch signaling pathway	1/41	48/7469	0.232834	0.611891	0.565547	3065	1
KEGG_Pathway_Module_16	hsa05225	Hepatocellular carcinoma	2/41	168/7469	0.235208	0.611891	0.565547	6934/86	2
KEGG_Pathway_Module_16	hsa05213	Endometrial cancer	1/41	58/7469	0.274205	0.611891	0.565547	6934	1
KEGG_Pathway_Module_16	hsa04213	Longevity regulating pathway - multiple species	1/41	62/7469	0.290137	0.611891	0.565547	3065	1
KEGG_Pathway_Module_16	hsa05217	Basal cell carcinoma	1/41	63/7469	0.294066	0.611891	0.565547	6934	1
KEGG_Pathway_Module_16	hsa05221	Acute myeloid leukemia	1/41	66/7469	0.305727	0.611891	0.565547	6934	1
KEGG_Pathway_Module_16	hsa05031	Amphetamine addiction	1/41	68/7469	0.313396	0.611891	0.565547	3065	1
KEGG_Pathway_Module_16	hsa04520	Adherens junction	1/41	72/7469	0.328488	0.611891	0.565547	6934	1
KEGG_Pathway_Module_16	hsa05412	Arrhythmogenic right ventricular cardiomyopathy (ARVC)	1/41	72/7469	0.328488	0.611891	0.565547	6934	1
KEGG_Pathway_Module_16	hsa05166	Human T-cell leukemia virus 1 infection	2/41	219/7469	0.339403	0.611891	0.565547	10524/8295	2
KEGG_Pathway_Module_16	hsa05220	Chronic myeloid leukemia	1/41	76/7469	0.343256	0.611891	0.565547	3065	1
KEGG_Pathway_Module_16	hsa05132	Salmonella infection	1/41	86/7469	0.378803	0.621237	0.574186	5585	1
KEGG_Pathway_Module_16	hsa05210	Colorectal cancer	1/41	86/7469	0.378803	0.621237	0.574186	6934	1
KEGG_Pathway_Module_16	hsa04064	NF-kappa B signaling pathway	1/41	95/7469	0.409186	0.645254	0.596384	7329	1
KEGG_Pathway_Module_16	hsa04916	Melanogenesis	1/41	101/7469	0.42863	0.650882	0.601586	6934	1
KEGG_Pathway_Module_16	hsa04919	Thyroid hormone signaling pathway	1/41	116/7469	0.47455	0.673995	0.622948	3065	1
KEGG_Pathway_Module_16	hsa05206	MicroRNAs in cancer	2/41	299/7469	0.493015	0.673995	0.622948	3065/7329	2
KEGG_Pathway_Module_16	hsa04110	Cell cycle	1/41	124/7469	0.497547	0.673995	0.622948	3065	1
KEGG_Pathway_Module_16	hsa04120	Ubiquitin mediated proteolysis	1/41	137/7469	0.53284	0.673995	0.622948	7329	1
KEGG_Pathway_Module_16	hsa05224	Breast cancer	1/41	147/7469	0.558331	0.673995	0.622948	6934	1
KEGG_Pathway_Module_16	hsa05165	Human papillomavirus infection	2/41	339/7469	0.561489	0.673995	0.622948	3065/6934	2
KEGG_Pathway_Module_16	hsa05226	Gastric cancer	1/41	149/7469	0.563264	0.673995	0.622948	6934	1
KEGG_Pathway_Module_16	hsa04390	Hippo signaling pathway	1/41	154/7469	0.575362	0.673995	0.622948	6934	1
KEGG_Pathway_Module_16	hsa04621	NOD-like receptor signaling pathway	1/41	168/7469	0.607523	0.680488	0.628949	79184	1
KEGG_Pathway_Module_16	hsa03013	RNA transport	1/41	171/7469	0.614099	0.680488	0.628949	7329	1
KEGG_Pathway_Module_16	hsa05016	Huntington disease	1/41	193/7469	0.659145	0.708793	0.65511	3065	1
KEGG_Pathway_Module_16	hsa05169	Epstein-Barr virus infection	1/41	201/7469	0.674218	0.708793	0.65511	3065	1
KEGG_Pathway_Module_16	hsa04714	Thermogenesis	1/41	229/7469	0.722024	0.740075	0.684023	86	1
KEGG_Pathway_Module_16	hsa04151	PI3K-Akt signaling pathway	1/41	354/7469	0.86416	0.86416	0.79871	5585	1
KEGG_Pathway_Module_2	hsa03010	Ribosome	119/204	153/7469	1.20303e-171	3.60909e-170	2.78597e-170	100529097/11222/11224/140032/140801/200916/2197/23521/25873/28998/29088/29093/3921/4736/51021/51023/51065/51069/51073/51081/51116/51121/51187/51264/54948/55052/55168/55173/6122/6123/6124/6125/6128/6129/6130/6132/6133/6134/6135/6136/6137/6138/6139/6141/6142/6143/6144/6146/6147/6152/6154/6155/6156/6157/6158/6159/6160/6161/6164/6165/6166/6167/6168/6169/6170/6171/6173/6175/6176/6181/6182/6183/6187/61…	119
KEGG_Pathway_Module_2	hsa03060	Protein export	17/204	23/7469	1.17512e-22	1.76268e-21	1.36067e-21	10952/23478/23480/28972/29927/55176/58477/60559/6726/6727/6728/6729/6730/6731/90701/9789/6734	17
KEGG_Pathway_Module_2	hsa03013	RNA transport	29/204	171/7469	1.1441e-15	1.1441e-14	8.83167e-15	10209/1915/1964/1965/1968/1973/1974/1975/1977/1981/1983/26019/26986/3646/5976/65110/728689/8661/8662/8663/8664/8665/8666/8667/8668/8669/8894/9086/9669	29
KEGG_Pathway_Module_2	hsa03018	RNA degradation	13/204	79/7469	1.73539e-07	1.30155e-06	1.0047e-06	10438/11340/118460/23016/23404/26986/5073/51010/51013/5393/5394/54512/56915	13
KEGG_Pathway_Module_2	hsa03008	Ribosome biogenesis in eukaryotes	12/204	105/7469	2.61575e-05	0.000156945	0.000121151	10171/10885/2091/51077/55127/55272/55651/5822/84135/92856/84916/79631	12
KEGG_Pathway_Module_2	hsa04141	Protein processing in endoplasmic reticulum	13/204	165/7469	0.000554356	0.00277178	0.00213962	10952/1650/1965/23471/23480/29927/55176/6184/6185/6745/6746/6747/6748	13
KEGG_Pathway_Module_2	hsa03015	mRNA surveillance pathway	8/204	91/7469	0.00329263	0.0141113	0.0108929	2107/23049/23708/26019/26986/2935/5976/65110	8
KEGG_Pathway_Module_2	hsa05110	Vibrio cholerae infection	4/204	50/7469	0.0468839	0.175815	0.135717	10952/23480/29927/55176	4
KEGG_Pathway_Module_2	hsa00510	N-Glycan biosynthesis	3/204	49/7469	0.149081	0.496938	0.383601	1650/6184/6185	3
KEGG_Pathway_Module_2	hsa05134	Legionellosis	2/204	55/7469	0.445833	0.998407	0.7707	1915/1937	2
KEGG_Pathway_Module_2	hsa04145	Phagosome	4/204	152/7469	0.600762	0.998407	0.7707	10952/23480/29927/55176	4
KEGG_Pathway_Module_2	hsa01521	EGFR tyrosine kinase inhibitor resistance	2/204	79/7469	0.640518	0.998407	0.7707	1977/6194	2
KEGG_Pathway_Module_2	hsa05162	Measles	3/204	132/7469	0.704624	0.998407	0.7707	1965/8667/10399	3
KEGG_Pathway_Module_2	hsa04066	HIF-1 signaling pathway	2/204	100/7469	0.763268	0.998407	0.7707	1977/6194	2
KEGG_Pathway_Module_2	hsa04150	mTOR signaling pathway	3/204	151/7469	0.786533	0.998407	0.7707	1975/1977/6194	3
KEGG_Pathway_Module_2	hsa05416	Viral myocarditis	1/204	59/7469	0.806087	0.998407	0.7707	1981	1
KEGG_Pathway_Module_2	hsa05160	Hepatitis C	2/204	131/7469	0.877906	0.998407	0.7707	1965/3646	2
KEGG_Pathway_Module_2	hsa04910	Insulin signaling pathway	2/204	137/7469	0.893115	0.998407	0.7707	1977/6194	2
KEGG_Pathway_Module_2	hsa04211	Longevity regulating pathway	1/204	89/7469	0.916215	0.998407	0.7707	1977	1
KEGG_Pathway_Module_2	hsa04152	AMPK signaling pathway	1/204	120/7469	0.964925	0.998407	0.7707	1938	1
KEGG_Pathway_Module_2	hsa04140	Autophagy - animal	1/204	128/7469	0.972001	0.998407	0.7707	1965	1
KEGG_Pathway_Module_2	hsa05205	Proteoglycans in cancer	2/204	201/7469	0.975905	0.998407	0.7707	1975/6194	2
KEGG_Pathway_Module_2	hsa04210	Apoptosis	1/204	136/7469	0.977655	0.998407	0.7707	1965	1
KEGG_Pathway_Module_2	hsa04371	Apelin signaling pathway	1/204	137/7469	0.978277	0.998407	0.7707	6194	1
KEGG_Pathway_Module_2	hsa04932	Non-alcoholic fatty liver disease (NAFLD)	1/204	149/7469	0.984521	0.998407	0.7707	1965	1
KEGG_Pathway_Module_2	hsa04921	Oxytocin signaling pathway	1/204	152/7469	0.985779	0.998407	0.7707	1938	1
KEGG_Pathway_Module_2	hsa05164	Influenza A	1/204	171/7469	0.991696	0.998407	0.7707	1965	1
KEGG_Pathway_Module_2	hsa05168	Herpes simplex infection	1/204	185/7469	0.994418	0.998407	0.7707	1965	1
KEGG_Pathway_Module_2	hsa04151	PI3K-Akt signaling pathway	3/204	354/7469	0.997156	0.998407	0.7707	1975/1977/6194	3
KEGG_Pathway_Module_2	hsa04714	Thermogenesis	1/204	229/7469	0.998407	0.998407	0.7707	6194	1
KEGG_Pathway_Module_3	hsa04062	Chemokine signaling pathway	54/137	189/7469	1.95712e-52	1.68509e-50	9.81913e-51	10563/10663/10681/108/10803/10850/111/1230/1232/1233/1234/1236/2770/2771/2773/2783/2784/2785/2786/2787/2788/2790/2791/2792/2793/2833/2919/2920/2921/3577/3579/3627/4283/51764/5196/54331/5473/55970/58191/59345/6347/6352/6360/6363/6364/6366/6372/6373/6374/6387/729230/7852/94235/3576	54
KEGG_Pathway_Module_3	hsa04080	Neuroactive ligand-receptor interaction	61/137	277/7469	3.00909e-52	1.68509e-50	9.81913e-51	10316/11255/1268/1269/134/150/151/152/1813/1814/1815/186/187/1901/1902/1903/23566/2357/2358/2359/2587/2831/2832/2847/3350/3351/3352/3354/3355/3361/339403/4543/4886/4887/4889/4985/4986/4987/4988/51289/53637/53829/5540/56923/5733/59340/623/624/6751/6752/6753/6754/6755/719/728/84539/8484/8698/8811/9170/9294	61
KEGG_Pathway_Module_3	hsa04726	Serotonergic synapse	28/137	115/7469	1.69263e-24	6.31914e-23	3.68221e-23	10681/111/2770/2771/2773/2775/2783/2784/2785/2786/2787/2788/2790/2791/2792/2793/3350/3351/3352/3354/3355/3361/351/51764/54331/55970/59345/94235	28
KEGG_Pathway_Module_3	hsa05032	Morphine addiction	24/137	91/7469	5.71543e-22	1.60032e-20	9.32517e-21	10681/108/111/134/2770/2771/2773/2775/2783/2784/2785/2786/2787/2788/2790/2791/2792/2793/4988/51764/54331/55970/59345/94235	24
KEGG_Pathway_Module_3	hsa05163	Human cytomegalovirus infection	32/137	225/7469	2.66727e-20	5.97468e-19	3.48148e-19	10681/108/111/1230/1232/1234/2770/2771/2773/2775/2783/2784/2785/2786/2787/2788/2790/2791/2792/2793/3579/51764/54331/55970/5733/59345/6347/6352/6387/7852/94235/3576	32
KEGG_Pathway_Module_3	hsa04713	Circadian entrainment	23/137	96/7469	4.87012e-20	9.09089e-19	5.29732e-19	10681/108/111/2770/2771/2773/2775/2783/2784/2785/2786/2787/2788/2790/2791/2792/2793/4543/51764/54331/55970/59345/94235	23
KEGG_Pathway_Module_3	hsa04727	GABAergic synapse	22/137	88/7469	1.2284e-19	1.96545e-18	1.14528e-18	10681/108/111/2770/2771/2773/2775/2783/2784/2785/2786/2787/2788/2790/2791/2792/2793/51764/54331/55970/59345/94235	22
KEGG_Pathway_Module_3	hsa04060	Cytokine-cytokine receptor interaction	34/137	294/7469	1.21218e-18	1.69705e-17	9.8888e-18	10563/10663/10803/10850/1230/1232/1233/1234/1236/2833/2919/2920/2921/3577/3579/3627/4283/5196/5473/57007/58191/6347/6352/6360/6363/6364/6366/6372/6373/6374/6387/729230/7852/3576	34
KEGG_Pathway_Module_3	hsa04926	Relaxin signaling pathway	24/137	130/7469	4.88151e-18	6.07476e-17	3.53981e-17	10681/108/111/2770/2771/2773/2775/2783/2784/2785/2786/2787/2788/2790/2791/2792/2793/339403/51289/51764/54331/55970/59345/94235	24
KEGG_Pathway_Module_3	hsa04728	Dopaminergic synapse	24/137	131/7469	5.88838e-18	6.59498e-17	3.84294e-17	10681/111/1813/1814/1815/2770/2771/2773/2775/2783/2784/2785/2786/2787/2788/2790/2791/2792/2793/51764/54331/55970/59345/94235	24
KEGG_Pathway_Module_3	hsa04725	Cholinergic synapse	22/137	112/7469	3.3429e-17	3.40368e-16	1.98335e-16	10681/108/111/2770/2771/2773/2775/2783/2784/2785/2786/2787/2788/2790/2791/2792/2793/51764/54331/55970/59345/94235	22
KEGG_Pathway_Module_3	hsa04724	Glutamatergic synapse	22/137	114/7469	4.99155e-17	4.65878e-16	2.7147e-16	10681/108/111/2770/2771/2773/2775/2783/2784/2785/2786/2787/2788/2790/2791/2792/2793/51764/54331/55970/59345/94235	22
KEGG_Pathway_Module_3	hsa04371	Apelin signaling pathway	23/137	137/7469	2.34651e-16	2.02161e-15	1.17801e-15	10681/108/111/187/2770/2771/2773/2783/2784/2785/2786/2787/2788/2790/2791/2792/2793/51764/54331/55970/59345/8862/94235	23
KEGG_Pathway_Module_3	hsa04723	Retrograde endocannabinoid signaling	23/137	148/7469	1.37133e-15	1.09706e-14	6.39266e-15	10681/108/111/1268/2770/2771/2773/2775/2783/2784/2785/2786/2787/2788/2790/2791/2792/2793/51764/54331/55970/59345/94235	23
KEGG_Pathway_Module_3	hsa05167	Kaposi sarcoma-associated herpesvirus infection	25/137	186/7469	2.37978e-15	1.7769e-14	1.03541e-14	10681/1230/1232/1233/1234/2783/2784/2785/2786/2787/2788/2790/2791/2792/2793/2919/2920/2921/51764/54331/55970/59345/718/94235/3576	25
KEGG_Pathway_Module_3	hsa05034	Alcoholism	23/137	180/7469	1.07058e-13	7.49404e-13	4.36683e-13	10681/111/1813/2770/2771/2773/2775/2783/2784/2785/2786/2787/2788/2790/2791/2792/2793/4852/51764/54331/55970/59345/94235	23
KEGG_Pathway_Module_3	hsa05170	Human immunodeficiency virus 1 infection	22/137	212/7469	2.7208e-11	1.79253e-10	1.04452e-10	10681/1234/2770/2771/2773/2775/2783/2784/2785/2786/2787/2788/2790/2791/2792/2793/51764/54331/55970/59345/7852/94235	22
KEGG_Pathway_Module_3	hsa04024	cAMP signaling pathway	20/137	199/7469	4.24537e-10	2.64156e-09	1.53926e-09	108/111/134/1813/2770/2771/2773/3350/3351/3352/3354/3355/338442/4852/4886/5733/6751/6752/6755/8843	20
KEGG_Pathway_Module_3	hsa04923	Regulation of lipolysis in adipocytes	9/137	54/7469	4.77032e-07	2.81198e-06	1.63856e-06	108/111/134/2770/2771/2773/4852/4886/5733	9
KEGG_Pathway_Module_3	hsa04014	Ras signaling pathway	16/137	232/7469	4.67127e-06	2.61591e-05	1.52431e-05	10681/2783/2784/2785/2786/2787/2788/2790/2791/2792/2793/51764/54331/55970/59345/94235	16
KEGG_Pathway_Module_3	hsa04071	Sphingolipid signaling pathway	11/137	118/7469	9.49885e-06	5.06605e-05	2.95202e-05	134/1901/1903/2770/2771/2773/4985/53637/624/8698/9294	11
KEGG_Pathway_Module_3	hsa04151	PI3K-Akt signaling pathway	19/137	354/7469	2.20496e-05	0.000112252	6.54103e-05	10681/1902/23566/2783/2784/2785/2786/2787/2788/2790/2791/2792/2793/51764/54331/55970/59345/9170/94235	19
KEGG_Pathway_Module_3	hsa04657	IL-17 signaling pathway	9/137	93/7469	4.71194e-05	0.000229451	0.000133703	2919/2920/2921/3627/6347/6364/6372/6374/3576	9
KEGG_Pathway_Module_3	hsa05150	Staphylococcus aureus infection	7/137	56/7469	6.56631e-05	0.000306428	0.000178557	2357/2358/2359/718/719/727/728	7
KEGG_Pathway_Module_3	hsa05133	Pertussis	8/137	76/7469	6.89099e-05	0.000308716	0.000179891	2770/2771/2773/6372/6374/718/727/3576	8
KEGG_Pathway_Module_3	hsa05142	Chagas disease (American trypanosomiasis)	9/137	102/7469	9.76106e-05	0.000420476	0.000245014	2770/2771/2773/2775/624/6347/6352/718/3576	9
KEGG_Pathway_Module_3	hsa04742	Taste transduction	8/137	83/7469	0.000129434	0.000536911	0.000312862	2784/3350/3351/3352/3354/3355/346562/51764	8
KEGG_Pathway_Module_3	hsa04744	Phototransduction	5/137	28/7469	0.000135055	0.000540221	0.000314791	2779/2792/5145/5148/5158	5
KEGG_Pathway_Module_3	hsa04022	cGMP-PKG signaling pathway	11/137	163/7469	0.000188445	0.000727789	0.000424087	108/111/134/150/151/152/2770/2771/2773/4985/624	11
KEGG_Pathway_Module_3	hsa05323	Rheumatoid arthritis	8/137	90/7469	0.000228427	0.000852793	0.000496929	2919/6347/6352/6364/6372/6374/6387/3576	8
KEGG_Pathway_Module_3	hsa05030	Cocaine addiction	6/137	49/7469	0.000249595	0.000901762	0.000525463	111/1813/26086/2770/2771/2773	6
KEGG_Pathway_Module_3	hsa04015	Rap1 signaling pathway	12/137	206/7469	0.000378897	0.00132614	0.00077275	108/111/1268/1813/1902/23566/2357/2770/2771/2773/2775/9170	12
KEGG_Pathway_Module_3	hsa04971	Gastric acid secretion	7/137	75/7469	0.000420798	0.00142816	0.000832199	108/111/2770/2771/2773/6750/6752	7
KEGG_Pathway_Module_3	hsa04610	Complement and coagulation cascades	7/137	79/7469	0.000578318	0.00190505	0.00111008	3827/623/624/718/719/727/728	7
KEGG_Pathway_Module_3	hsa04668	TNF signaling pathway	8/137	110/7469	0.00088837	0.00284278	0.00165651	2919/2920/2921/3627/6347/6352/6364/6374	8
KEGG_Pathway_Module_3	hsa04540	Gap junction	7/137	88/7469	0.00110485	0.00343731	0.00200295	108/111/1813/1902/2770/2771/2773	7
KEGG_Pathway_Module_3	hsa04924	Renin secretion	6/137	65/7469	0.00116004	0.00351146	0.00204615	111/134/183/2770/2771/2773	6
KEGG_Pathway_Module_3	hsa04916	Melanogenesis	7/137	101/7469	0.00245856	0.0072463	0.00422247	108/111/2770/2771/2773/2775/5443	7
KEGG_Pathway_Module_3	hsa05134	Legionellosis	5/137	55/7469	0.0032176	0.00924027	0.00538437	2919/2920/2921/718/3576	5
KEGG_Pathway_Module_3	hsa04915	Estrogen signaling pathway	8/137	137/7469	0.00358675	0.0100429	0.00585207	108/111/2770/2771/2773/2775/2852/4988	8
KEGG_Pathway_Module_3	hsa04072	Phospholipase D signaling pathway	8/137	146/7469	0.00527066	0.0143979	0.00838975	108/111/1902/23566/3577/3579/9170/3576	8
KEGG_Pathway_Module_3	hsa05120	Epithelial cell signaling in Helicobacter pylori infection	5/137	68/7469	0.00798012	0.0212803	0.0124002	2919/3577/3579/6352/3576	5
KEGG_Pathway_Module_3	hsa04928	Parathyroid hormone synthesis, secretion and action	6/137	106/7469	0.0130268	0.0339303	0.0197714	108/111/2770/2771/2773/846	6
KEGG_Pathway_Module_3	hsa04730	Long-term depression	4/137	60/7469	0.0239384	0.060934	0.0355067	2770/2771/2773/2775	4
KEGG_Pathway_Module_3	hsa04611	Platelet activation	6/137	123/7469	0.0252651	0.062882	0.0366418	108/111/2770/2771/2773/64805	6
KEGG_Pathway_Module_3	hsa04064	NF-kappa B signaling pathway	5/137	95/7469	0.0300501	0.0731654	0.042634	2920/6363/6366/6387/3576	5
KEGG_Pathway_Module_3	hsa04621	NOD-like receptor signaling pathway	7/137	168/7469	0.0345553	0.0817363	0.0476283	2919/2920/2921/6347/6352/846/3576	7
KEGG_Pathway_Module_3	hsa04914	Progesterone-mediated oocyte maturation	5/137	99/7469	0.0350298	0.0817363	0.0476283	108/111/2770/2771/2773	5
KEGG_Pathway_Module_3	hsa04620	Toll-like receptor signaling pathway	5/137	104/7469	0.0419355	0.0958526	0.0558539	3627/4283/6352/6373/3576	5
KEGG_Pathway_Module_3	hsa04261	Adrenergic signaling in cardiomyocytes	6/137	144/7469	0.048739	0.109175	0.0636172	108/111/186/2770/2771/2773	6
KEGG_Pathway_Module_3	hsa04670	Leukocyte transendothelial migration	5/137	112/7469	0.0545889	0.119882	0.0698558	2770/2771/2773/6387/7852	5
KEGG_Pathway_Module_3	hsa05145	Toxoplasmosis	5/137	113/7469	0.0563106	0.121284	0.0706732	1234/2770/2771/2773/2775	5
KEGG_Pathway_Module_3	hsa04921	Oxytocin signaling pathway	6/137	152/7469	0.0603532	0.125216	0.0729639	108/111/2770/2771/2773/2775	6
KEGG_Pathway_Module_3	hsa04672	Intestinal immune network for IgA production	3/137	49/7469	0.0603718	0.125216	0.0729639	10803/6387/7852	3
KEGG_Pathway_Module_3	hsa04934	Cushing syndrome	6/137	154/7469	0.0634941	0.129297	0.0753422	108/111/2770/2771/2773/5443	6
KEGG_Pathway_Module_3	hsa04614	Renin-angiotensin system	2/137	23/7469	0.065756	0.131512	0.0766329	183/186	2
KEGG_Pathway_Module_3	hsa05132	Salmonella infection	4/137	86/7469	0.0728334	0.143111	0.0833919	2919/2920/2921/3576	4
KEGG_Pathway_Module_3	hsa04810	Regulation of actin cytoskeleton	7/137	213/7469	0.0962533	0.185868	0.108307	1902/55970/623/624/6387/7852/9170	7
KEGG_Pathway_Module_3	hsa04750	Inflammatory mediator regulation of TRP channels	4/137	99/7469	0.108184	0.205366	0.119668	108/111/623/624	4
KEGG_Pathway_Module_3	hsa04927	Cortisol synthesis and secretion	3/137	64/7469	0.112488	0.209977	0.122355	108/111/5443	3
KEGG_Pathway_Module_3	hsa05012	Parkinson disease	5/137	142/7469	0.119463	0.216035	0.125885	111/1813/2770/2771/2773	5
KEGG_Pathway_Module_3	hsa04020	Calcium signaling pathway	6/137	183/7469	0.119591	0.216035	0.125885	108/3361/5733/623/624/7852	6
KEGG_Pathway_Module_3	hsa05020	Prion diseases	2/137	35/7469	0.134471	0.23906	0.139302	6352/727	2
KEGG_Pathway_Module_3	hsa00230	Purine metabolism	5/137	174/7469	0.214791	0.375808	0.218986	108/111/5145/5148/5158	5
KEGG_Pathway_Module_3	hsa04360	Axon guidance	5/137	175/7469	0.218103	0.375808	0.218986	2770/2771/2773/6387/7852	5
KEGG_Pathway_Module_3	hsa04913	Ovarian steroidogenesis	2/137	49/7469	0.226569	0.378742	0.220696	108/111	2
KEGG_Pathway_Module_3	hsa05144	Malaria	2/137	49/7469	0.226569	0.378742	0.220696	6347/3576	2
KEGG_Pathway_Module_3	hsa04925	Aldosterone synthesis and secretion	3/137	96/7469	0.257873	0.424732	0.247494	108/111/5443	3
KEGG_Pathway_Module_3	hsa01522	Endocrine resistance	3/137	98/7469	0.267815	0.434714	0.253311	108/111/2852	3
KEGG_Pathway_Module_3	hsa04213	Longevity regulating pathway - multiple species	2/137	62/7469	0.315216	0.504345	0.293886	108/111	2
KEGG_Pathway_Module_3	hsa04623	Cytosolic DNA-sensing pathway	2/137	63/7469	0.32199	0.507928	0.295973	3627/6352	2
KEGG_Pathway_Module_3	hsa04920	Adipocytokine signaling pathway	2/137	69/7469	0.36224	0.563484	0.328346	4852/5443	2
KEGG_Pathway_Module_3	hsa04622	RIG-I-like receptor signaling pathway	2/137	70/7469	0.368867	0.565934	0.329773	3627/3576	2
KEGG_Pathway_Module_3	hsa04976	Bile secretion	2/137	71/7469	0.375469	0.568277	0.331139	108/111	2
KEGG_Pathway_Module_3	hsa05164	Influenza A	4/137	171/7469	0.383912	0.573309	0.334071	3627/6347/6352/3576	4
KEGG_Pathway_Module_3	hsa04918	Thyroid hormone synthesis	2/137	74/7469	0.395101	0.582253	0.339283	108/111	2
KEGG_Pathway_Module_3	hsa05168	Herpes simplex infection	4/137	185/7469	0.44202	0.642939	0.374645	6347/6352/718/727	4
KEGG_Pathway_Module_3	hsa04911	Insulin secretion	2/137	85/7469	0.464482	0.666949	0.388636	108/111	2
KEGG_Pathway_Module_3	hsa04211	Longevity regulating pathway	2/137	89/7469	0.488552	0.683704	0.398399	108/111	2
KEGG_Pathway_Module_3	hsa04970	Salivary secretion	2/137	90/7469	0.494464	0.683704	0.398399	108/111	2
KEGG_Pathway_Module_3	hsa05414	Dilated cardiomyopathy (DCM)	2/137	90/7469	0.494464	0.683704	0.398399	108/111	2
KEGG_Pathway_Module_3	hsa05203	Viral carcinogenesis	4/137	201/7469	0.506354	0.690813	0.402542	1232/1233/1234/718	4
KEGG_Pathway_Module_3	hsa04912	GnRH signaling pathway	2/137	93/7469	0.511942	0.690813	0.402542	108/111	2
KEGG_Pathway_Module_3	hsa04972	Pancreatic secretion	2/137	96/7469	0.529023	0.693931	0.404358	108/111	2
KEGG_Pathway_Module_3	hsa05146	Amoebiasis	2/137	96/7469	0.529023	0.693931	0.404358	2919/3576	2
KEGG_Pathway_Module_3	hsa05219	Bladder cancer	1/137	41/7469	0.53284	0.693931	0.404358	3576	1
KEGG_Pathway_Module_3	hsa04933	AGE-RAGE signaling pathway in diabetic complications	2/137	99/7469	0.545699	0.702508	0.409356	6347/3576	2
KEGG_Pathway_Module_3	hsa04973	Carbohydrate digestion and absorption	1/137	44/7469	0.558218	0.710459	0.413989	346562	1
KEGG_Pathway_Module_3	hsa04961	Endocrine and other factor-regulated calcium reabsorption	1/137	47/7469	0.582227	0.73269	0.426943	624	1
KEGG_Pathway_Module_3	hsa04270	Vascular smooth muscle contraction	2/137	121/7469	0.655249	0.812358	0.473367	108/111	2
KEGG_Pathway_Module_3	hsa04144	Endocytosis	4/137	244/7469	0.660041	0.812358	0.473367	1234/3577/3579/7852	4
KEGG_Pathway_Module_3	hsa04114	Oocyte meiosis	2/137	125/7469	0.672761	0.819014	0.477245	108/111	2
KEGG_Pathway_Module_3	hsa05131	Shigellosis	1/137	65/7469	0.701375	0.831906	0.484757	3576	1
KEGG_Pathway_Module_3	hsa04068	FoxO signaling pathway	2/137	132/7469	0.701679	0.831906	0.484757	1901/8698	2
KEGG_Pathway_Module_3	hsa05322	Systemic lupus erythematosus	2/137	133/7469	0.705634	0.831906	0.484757	718/727	2
KEGG_Pathway_Module_3	hsa05031	Amphetamine addiction	1/137	68/7469	0.717649	0.837257	0.487875	111	1
KEGG_Pathway_Module_3	hsa05140	Leishmaniasis	1/137	74/7469	0.747602	0.863211	0.502999	718	1
KEGG_Pathway_Module_3	hsa04714	Thermogenesis	3/137	229/7469	0.796997	0.910854	0.530761	108/111/1268	3
KEGG_Pathway_Module_3	hsa04922	Glucagon signaling pathway	1/137	103/7469	0.853405	0.965468	0.562585	108	1
KEGG_Pathway_Module_3	hsa05160	Hepatitis C	1/137	131/7469	0.913424	0.994764	0.579656	3576	1
KEGG_Pathway_Module_3	hsa05166	Human T-cell leukemia virus 1 infection	2/137	219/7469	0.914839	0.994764	0.579656	108/111	2
KEGG_Pathway_Module_3	hsa05418	Fluid shear stress and atherosclerosis	1/137	139/7469	0.925546	0.994764	0.579656	6347	1
KEGG_Pathway_Module_3	hsa05161	Hepatitis B	1/137	144/7469	0.93225	0.994764	0.579656	3576	1
KEGG_Pathway_Module_3	hsa04932	Non-alcoholic fatty liver disease (NAFLD)	1/137	149/7469	0.938355	0.994764	0.579656	3576	1
KEGG_Pathway_Module_3	hsa04145	Phagosome	1/137	152/7469	0.941752	0.994764	0.579656	718	1
KEGG_Pathway_Module_3	hsa04218	Cellular senescence	1/137	160/7469	0.94993	0.994764	0.579656	3576	1
KEGG_Pathway_Module_3	hsa05010	Alzheimer disease	1/137	171/7469	0.959344	0.994764	0.579656	351	1
KEGG_Pathway_Module_3	hsa05152	Tuberculosis	1/137	179/7469	0.965066	0.994764	0.579656	718	1
KEGG_Pathway_Module_3	hsa05202	Transcriptional misregulation in cancer	1/137	186/7469	0.969412	0.994764	0.579656	3576	1
KEGG_Pathway_Module_3	hsa05169	Epstein-Barr virus infection	1/137	201/7469	0.977	0.994764	0.579656	3627	1
KEGG_Pathway_Module_3	hsa04010	MAPK signaling pathway	1/137	295/7469	0.9962	0.99809	0.581594	55970	1
KEGG_Pathway_Module_3	hsa04740	Olfactory transduction	2/137	448/7469	0.99809	0.99809	0.581594	2788/51764	2
KEGG_Pathway_Module_4	hsa03050	Proteasome	43/107	45/7469	2.99134e-81	4.21779e-79	2.73944e-79	10197/10213/11047/122706/143471/23198/5682/5683/5684/5685/5686/5687/5688/5689/5690/5691/5692/5693/5694/5695/5696/5698/5699/5700/5701/5702/5704/5705/5706/5707/5708/5709/5710/5713/5714/5717/5718/5719/5720/5721/9491/9861/7979	43
KEGG_Pathway_Module_4	hsa04110	Cell cycle	30/107	124/7469	1.14483e-29	8.07105e-28	5.24212e-28	1017/1026/1027/10393/246184/2932/29882/29945/4085/4998/51433/51434/51529/595/64682/6500/6502/701/8454/8697/8881/890/8900/898/9184/9232/990/991/996/9978	30
KEGG_Pathway_Module_4	hsa05169	Epstein-Barr virus infection	34/107	201/7469	4.27176e-28	2.00773e-26	1.30401e-26	1017/10213/1026/1027/11047/4790/4791/4792/4793/4794/5700/5701/5702/5704/5705/5706/5707/5708/5709/5710/5713/5714/5717/5718/5719/595/6502/7124/7187/890/8900/898/9861/7979	34
KEGG_Pathway_Module_4	hsa04120	Ubiquitin mediated proteolysis	27/107	137/7469	4.34018e-24	1.52991e-22	9.93674e-23	10393/11065/246184/29882/29945/329/51433/51434/51529/57154/64682/64750/6500/6502/7317/7319/7321/7324/83737/8452/8454/868/8697/8881/991/996/9978	27
KEGG_Pathway_Module_4	hsa04114	Oocyte meiosis	25/107	125/7469	1.76443e-22	4.97568e-21	3.23169e-21	1017/10393/246184/26271/29882/29945/4085/51433/51434/51529/5516/5519/5526/5529/64682/6500/6790/8454/8697/8881/898/9232/991/996/9978	25
KEGG_Pathway_Module_4	hsa05166	Human T-cell leukemia virus 1 infection	26/107	219/7469	2.0966e-17	4.92702e-16	3.20008e-16	1017/1026/10393/246184/29882/29945/4085/4790/4791/4792/51433/51434/51529/595/64682/701/7124/8697/8881/890/8900/898/9184/9232/991/996	26
KEGG_Pathway_Module_4	hsa04914	Progesterone-mediated oocyte maturation	16/107	99/7469	4.24296e-13	8.54652e-12	5.55093e-12	1017/10393/246184/29882/29945/4085/51433/51434/51529/64682/6790/8697/8881/890/8900/996	16
KEGG_Pathway_Module_4	hsa05222	Small cell lung cancer	12/107	93/7469	6.33854e-09	1.11717e-07	7.25596e-08	1017/1026/1027/1163/1164/329/4790/4792/595/6502/7187/898	12
KEGG_Pathway_Module_4	hsa05165	Human papillomavirus infection	20/107	339/7469	5.07778e-08	7.95519e-07	5.16686e-07	1017/1026/1027/1452/1855/1857/2932/4790/5516/5519/5526/5529/5700/595/7124/7187/8312/890/8900/898	20
KEGG_Pathway_Module_4	hsa05203	Viral carcinogenesis	14/107	201/7469	8.93391e-07	1.25968e-05	8.18158e-06	1017/1026/1027/4790/4791/4792/5700/595/6502/7187/890/8900/898/991	14
KEGG_Pathway_Module_4	hsa04340	Hedgehog signaling pathway	7/107	47/7469	3.99066e-06	5.1153e-05	3.32237e-05	1452/2932/57154/595/64750/8452/8454	7
KEGG_Pathway_Module_4	hsa04350	TGF-beta signaling pathway	8/107	84/7469	2.41315e-05	0.000283545	0.000184162	5516/5519/57154/64750/6500/7124/8454/9978	8
KEGG_Pathway_Module_4	hsa05161	Hepatitis B	10/107	144/7469	3.69719e-05	0.000401003	0.00026045	1017/1026/1027/4790/4792/595/7124/890/8900/898	10
KEGG_Pathway_Module_4	hsa05226	Gastric cancer	10/107	149/7469	4.95473e-05	0.000499012	0.000324107	1017/1026/1027/1452/1855/1857/2932/595/8312/898	10
KEGG_Pathway_Module_4	hsa05215	Prostate cancer	8/107	97/7469	6.86013e-05	0.000644853	0.000418829	1017/1026/1027/2932/4790/4792/595/898	8
KEGG_Pathway_Module_4	hsa05160	Hepatitis C	9/107	131/7469	0.000100218	0.000881518	0.000572543	10197/1026/2932/4790/4792/5516/5519/7124/7187	9
KEGG_Pathway_Module_4	hsa05162	Measles	9/107	132/7469	0.000106282	0.000881518	0.000572543	1017/1027/2932/4790/4792/4793/595/868/898	9
KEGG_Pathway_Module_4	hsa04310	Wnt signaling pathway	9/107	149/7469	0.000266972	0.00209128	0.00135828	1452/1855/1857/2932/595/6500/8312/8454/9978	9
KEGG_Pathway_Module_4	hsa04934	Cushing syndrome	9/107	154/7469	0.000341401	0.0024705	0.00160458	1017/1026/1027/1855/1857/2932/595/8312/898	9
KEGG_Pathway_Module_4	hsa04657	IL-17 signaling pathway	7/107	93/7469	0.000350425	0.0024705	0.00160458	2932/4790/4792/51433/5597/7124/7187	7
KEGG_Pathway_Module_4	hsa04660	T cell receptor signaling pathway	7/107	101/7469	0.000579371	0.00389006	0.00252658	2932/4790/4792/4793/4794/7124/868	7
KEGG_Pathway_Module_4	hsa05224	Breast cancer	8/107	147/7469	0.00117252	0.00751482	0.00488084	1026/1452/1855/1857/2932/4791/595/8312	8
KEGG_Pathway_Module_4	hsa05168	Herpes simplex infection	9/107	185/7469	0.00128299	0.00786528	0.00510847	1017/4790/4792/4793/6500/6502/7124/7187/8454	9
KEGG_Pathway_Module_4	hsa04390	Hippo signaling pathway	8/107	154/7469	0.00158075	0.00905279	0.00587975	1855/1857/2932/329/5516/5519/595/8312	8
KEGG_Pathway_Module_4	hsa04152	AMPK signaling pathway	7/107	120/7469	0.00160511	0.00905279	0.00587975	5516/5519/5526/5529/595/890/8900	7
KEGG_Pathway_Module_4	hsa05217	Basal cell carcinoma	5/107	63/7469	0.00199676	0.0108286	0.00703313	1026/1855/1857/2932/8312	5
KEGG_Pathway_Module_4	hsa04064	NF-kappa B signaling pathway	6/107	95/7469	0.00232637	0.0121488	0.0078906	329/4790/4791/4792/7124/7187	6
KEGG_Pathway_Module_4	hsa04920	Adipocytokine signaling pathway	5/107	69/7469	0.00298365	0.0150248	0.00975857	4790/4792/4793/4794/7124	5
KEGG_Pathway_Module_4	hsa04622	RIG-I-like receptor signaling pathway	5/107	70/7469	0.00317715	0.0154475	0.0100331	4790/4792/4793/7124/7187	5
KEGG_Pathway_Module_4	hsa04662	B cell receptor signaling pathway	5/107	71/7469	0.00337954	0.0158838	0.0103165	2932/4790/4792/4793/4794	5
KEGG_Pathway_Module_4	hsa05220	Chronic myeloid leukemia	5/107	76/7469	0.00453295	0.0206176	0.0133911	1026/1027/4790/4792/595	5
KEGG_Pathway_Module_4	hsa04668	TNF signaling pathway	6/107	110/7469	0.0048258	0.0212637	0.0138107	329/4790/4792/7124/7187/83737	6
KEGG_Pathway_Module_4	hsa04071	Sphingolipid signaling pathway	6/107	118/7469	0.00677397	0.0289433	0.0187986	4790/5516/5519/5526/5529/7124	6
KEGG_Pathway_Module_4	hsa05134	Legionellosis	4/107	55/7469	0.00775385	0.0318282	0.0206723	4790/4791/4792/7124	4
KEGG_Pathway_Module_4	hsa04218	Cellular senescence	7/107	160/7469	0.00790062	0.0318282	0.0206723	1017/1026/4790/595/890/8900/898	7
KEGG_Pathway_Module_4	hsa05213	Endometrial cancer	4/107	58/7469	0.00933616	0.0365666	0.0237499	1026/2932/595/8312	4
KEGG_Pathway_Module_4	hsa04710	Circadian rhythm	3/107	31/7469	0.00960174	0.0365904	0.0237653	6500/8454/9978	3
KEGG_Pathway_Module_4	hsa04621	NOD-like receptor signaling pathway	7/107	168/7469	0.010198	0.0368698	0.0239468	329/4790/4792/4793/7124/7187/79184	7
KEGG_Pathway_Module_4	hsa05225	Hepatocellular carcinoma	7/107	168/7469	0.010198	0.0368698	0.0239468	1026/1452/1855/1857/2932/595/8312	7
KEGG_Pathway_Module_4	hsa04151	PI3K-Akt signaling pathway	11/107	354/7469	0.0121893	0.0429672	0.027907	1017/1026/1027/2932/4790/5516/5519/5526/5529/595/898	11
KEGG_Pathway_Module_4	hsa05142	Chagas disease (American trypanosomiasis)	5/107	102/7469	0.0152705	0.0525156	0.0341087	4790/4792/5516/5519/7124	5
KEGG_Pathway_Module_4	hsa04625	C-type lectin receptor signaling pathway	5/107	104/7469	0.0164881	0.0553529	0.0359515	4790/4791/4792/7124/868	5
KEGG_Pathway_Module_4	hsa04115	p53 signaling pathway	4/107	72/7469	0.0194532	0.0637883	0.0414302	1017/1026/595/898	4
KEGG_Pathway_Module_4	hsa05140	Leishmaniasis	4/107	74/7469	0.0212923	0.0682322	0.0443166	4790/4792/4793/7124	4
KEGG_Pathway_Module_4	hsa05145	Toxoplasmosis	5/107	113/7469	0.0227658	0.071333	0.0463305	329/4790/4792/4793/7124	5
KEGG_Pathway_Module_4	hsa04612	Antigen processing and presentation	4/107	77/7469	0.0242454	0.0743175	0.0482689	10197/5720/5721/7124	4
KEGG_Pathway_Module_4	hsa04722	Neurotrophin signaling pathway	5/107	119/7469	0.0277119	0.0831357	0.0539963	2932/4790/4792/4793/4794	5
KEGG_Pathway_Module_4	hsa04330	Notch signaling pathway	3/107	48/7469	0.0310315	0.0911551	0.0592049	1855/1857/8650	3
KEGG_Pathway_Module_4	hsa04012	ErbB signaling pathway	4/107	85/7469	0.0332864	0.0957833	0.0622109	1026/1027/2932/868	4
KEGG_Pathway_Module_4	hsa05210	Colorectal cancer	4/107	86/7469	0.0345376	0.097396	0.0632583	1026/2932/595/8312	4
KEGG_Pathway_Module_4	hsa04728	Dopaminergic synapse	5/107	131/7469	0.0395364	0.109307	0.0709942	2932/5516/5519/5526/5529	5
KEGG_Pathway_Module_4	hsa04068	FoxO signaling pathway	5/107	132/7469	0.0406415	0.109611	0.071192	1017/1026/1027/595/6502	5
KEGG_Pathway_Module_4	hsa03015	mRNA surveillance pathway	4/107	91/7469	0.0412014	0.109611	0.071192	5516/5519/5526/5529	4
KEGG_Pathway_Module_4	hsa04658	Th1 and Th2 cell differentiation	4/107	92/7469	0.0426159	0.111275	0.0722725	4790/4792/4793/4794	4
KEGG_Pathway_Module_4	hsa05167	Kaposi sarcoma-associated herpesvirus infection	6/107	186/7469	0.0503467	0.129071	0.0838308	1026/2932/4790/4792/595/7187	6
KEGG_Pathway_Module_4	hsa04933	AGE-RAGE signaling pathway in diabetic complications	4/107	99/7469	0.0532796	0.13415	0.0871302	1027/4790/595/7124	4
KEGG_Pathway_Module_4	hsa04066	HIF-1 signaling pathway	4/107	100/7469	0.0549115	0.135834	0.0882234	1026/1027/4790/9978	4
KEGG_Pathway_Module_4	hsa04623	Cytosolic DNA-sensing pathway	3/107	63/7469	0.0611888	0.147471	0.0957818	4790/4792/4793	3
KEGG_Pathway_Module_4	hsa04620	Toll-like receptor signaling pathway	4/107	104/7469	0.0617077	0.147471	0.0957818	4790/4792/7124/7187	4
KEGG_Pathway_Module_4	hsa04150	mTOR signaling pathway	5/107	151/7469	0.0652202	0.150142	0.0975165	1855/1857/2932/6502/7124	5
KEGG_Pathway_Module_4	hsa05131	Shigellosis	3/107	65/7469	0.0659609	0.150142	0.0975165	4790/4792/4793	3
KEGG_Pathway_Module_4	hsa04659	Th17 cell differentiation	4/107	107/7469	0.0670846	0.150142	0.0975165	4790/4792/4793/4794	4
KEGG_Pathway_Module_4	hsa04931	Insulin resistance	4/107	107/7469	0.0670846	0.150142	0.0975165	2932/4790/4792/7124	4
KEGG_Pathway_Module_4	hsa05221	Acute myeloid leukemia	3/107	66/7469	0.0684094	0.150715	0.0978885	4790/595/8900	3
KEGG_Pathway_Module_4	hsa01523	Antifolate resistance	2/107	31/7469	0.07226	0.156749	0.101808	4790/7124	2
KEGG_Pathway_Module_4	hsa04917	Prolactin signaling pathway	3/107	70/7469	0.078609	0.167937	0.109075	2932/4790/595	3
KEGG_Pathway_Module_4	hsa05170	Human immunodeficiency virus 1 infection	6/107	212/7469	0.0833077	0.175319	0.113869	4790/4792/6500/7124/8454/9978	6
KEGG_Pathway_Module_4	hsa05212	Pancreatic cancer	3/107	75/7469	0.0922316	0.191245	0.124213	1026/4790/595	3
KEGG_Pathway_Module_4	hsa05216	Thyroid cancer	2/107	37/7469	0.0980052	0.198218	0.128742	1026/595	2
KEGG_Pathway_Module_4	hsa05164	Influenza A	5/107	171/7469	0.0984061	0.198218	0.128742	2932/4790/4792/4793/7124	5
KEGG_Pathway_Module_4	hsa05163	Human cytomegalovirus infection	6/107	225/7469	0.103432	0.205407	0.133411	1026/2932/4790/4792/595/7124	6
KEGG_Pathway_Module_4	hsa04380	Osteoclast differentiation	4/107	128/7469	0.111116	0.217602	0.141331	4790/4791/4792/7124	4
KEGG_Pathway_Module_4	hsa03440	Homologous recombination	2/107	41/7469	0.116387	0.221765	0.144035	79184/7979	2
KEGG_Pathway_Module_4	hsa05219	Bladder cancer	2/107	41/7469	0.116387	0.221765	0.144035	1026/595	2
KEGG_Pathway_Module_4	hsa04210	Apoptosis	4/107	136/7469	0.130602	0.245532	0.159472	329/4790/4792/7124	4
KEGG_Pathway_Module_4	hsa04550	Signaling pathways regulating pluripotency of stem cells	4/107	139/7469	0.138256	0.2565	0.166596	1855/1857/2932/8312	4
KEGG_Pathway_Module_4	hsa04261	Adrenergic signaling in cardiomyocytes	4/107	144/7469	0.151404	0.277246	0.18007	5516/5519/5526/5529	4
KEGG_Pathway_Module_4	hsa04932	Non-alcoholic fatty liver disease (NAFLD)	4/107	149/7469	0.165013	0.29524	0.191757	2932/4790/7124/83737	4
KEGG_Pathway_Module_4	hsa01522	Endocrine resistance	3/107	98/7469	0.165418	0.29524	0.191757	1026/1027/595	3
KEGG_Pathway_Module_4	hsa04916	Melanogenesis	3/107	101/7469	0.175996	0.310193	0.201469	1855/1857/2932	3
KEGG_Pathway_Module_4	hsa04141	Protein processing in endoplasmic reticulum	4/107	165/7469	0.211253	0.36479	0.236929	6500/7321/8454/9978	4
KEGG_Pathway_Module_4	hsa04730	Long-term depression	2/107	60/7469	0.212147	0.36479	0.236929	5516/5519	2
KEGG_Pathway_Module_4	hsa05321	Inflammatory bowel disease (IBD)	2/107	65/7469	0.238618	0.405364	0.263282	4790/7124	2
KEGG_Pathway_Module_4	hsa05223	Non-small cell lung cancer	2/107	66/7469	0.243937	0.409467	0.265947	1026/595	2
KEGG_Pathway_Module_4	hsa05120	Epithelial cell signaling in Helicobacter pylori infection	2/107	68/7469	0.25459	0.42232	0.274295	4790/4792	2
KEGG_Pathway_Module_4	hsa05211	Renal cell carcinoma	2/107	69/7469	0.259921	0.42615	0.276783	1026/9978	2
KEGG_Pathway_Module_4	hsa05214	Glioma	2/107	71/7469	0.270587	0.438196	0.284607	1026/595	2
KEGG_Pathway_Module_4	hsa05218	Melanoma	2/107	72/7469	0.27592	0.438196	0.284607	1026/595	2
KEGG_Pathway_Module_4	hsa05202	Transcriptional misregulation in cancer	4/107	186/7469	0.276592	0.438196	0.284607	1026/1027/4790/8900	4
KEGG_Pathway_Module_4	hsa01524	Platinum drug resistance	2/107	73/7469	0.281251	0.440626	0.286185	1026/329	2
KEGG_Pathway_Module_4	hsa04062	Chemokine signaling pathway	4/107	189/7469	0.286219	0.443483	0.28804	2932/4790/4792/4793	4
KEGG_Pathway_Module_4	hsa05133	Pertussis	2/107	76/7469	0.297223	0.455527	0.295863	4790/7124	2
KEGG_Pathway_Module_4	hsa05310	Asthma	1/107	31/7469	0.361237	0.547682	0.355717	7124	1
KEGG_Pathway_Module_4	hsa04136	Autophagy - other	1/107	32/7469	0.370426	0.555639	0.360885	5516	1
KEGG_Pathway_Module_4	hsa04215	Apoptosis - multiple species	1/107	33/7469	0.379484	0.563234	0.365818	329	1
KEGG_Pathway_Module_4	hsa05143	African trypanosomiasis	1/107	35/7469	0.397214	0.583408	0.378921	7124	1
KEGG_Pathway_Module_4	hsa05146	Amoebiasis	2/107	96/7469	0.401362	0.583423	0.378931	4790/7124	2
KEGG_Pathway_Module_4	hsa05330	Allograft rejection	1/107	38/7469	0.422873	0.608419	0.395166	7124	1
KEGG_Pathway_Module_4	hsa05206	MicroRNAs in cancer	5/107	299/7469	0.427811	0.609306	0.395742	1026/1027/4790/595/898	5
KEGG_Pathway_Module_4	hsa04530	Tight junction	3/107	170/7469	0.441593	0.622646	0.404406	5516/5519/595	3
KEGG_Pathway_Module_4	hsa05332	Graft-versus-host disease	1/107	41/7469	0.447449	0.624657	0.405712	7124	1
KEGG_Pathway_Module_4	hsa04940	Type I diabetes mellitus	1/107	43/7469	0.463255	0.636424	0.413355	7124	1
KEGG_Pathway_Module_4	hsa04144	Endocytosis	4/107	244/7469	0.464905	0.636424	0.413355	57154/64750/83737/868	4
KEGG_Pathway_Module_4	hsa04930	Type II diabetes mellitus	1/107	46/7469	0.486127	0.659076	0.428067	7124	1
KEGG_Pathway_Module_4	hsa03420	Nucleotide excision repair	1/107	47/7469	0.493534	0.662323	0.430176	9978	1
KEGG_Pathway_Module_4	hsa04919	Thyroid hormone signaling pathway	2/107	116/7469	0.497916	0.662323	0.430176	2932/595	2
KEGG_Pathway_Module_4	hsa05030	Cocaine addiction	1/107	49/7469	0.508033	0.663265	0.430788	4790	1
KEGG_Pathway_Module_4	hsa05144	Malaria	1/107	49/7469	0.508033	0.663265	0.430788	7124	1
KEGG_Pathway_Module_4	hsa00330	Arginine and proline metabolism	1/107	50/7469	0.515127	0.666357	0.432796	4953	1
KEGG_Pathway_Module_4	hsa05014	Amyotrophic lateral sclerosis (ALS)	1/107	51/7469	0.52212	0.669263	0.434684	7124	1
KEGG_Pathway_Module_4	hsa04510	Focal adhesion	3/107	199/7469	0.546696	0.691927	0.449404	2932/329/595	3
KEGG_Pathway_Module_4	hsa05205	Proteoglycans in cancer	3/107	201/7469	0.553528	0.691927	0.449404	1026/595/7124	3
KEGG_Pathway_Module_4	hsa00480	Glutathione metabolism	1/107	56/7469	0.555615	0.691927	0.449404	4953	1
KEGG_Pathway_Module_4	hsa04926	Relaxin signaling pathway	2/107	130/7469	0.559431	0.691927	0.449404	4790/4792	2
KEGG_Pathway_Module_4	hsa05416	Viral myocarditis	1/107	59/7469	0.574584	0.704489	0.457563	595	1
KEGG_Pathway_Module_4	hsa04910	Insulin signaling pathway	2/107	137/7469	0.588142	0.714897	0.464323	2932/868	2
KEGG_Pathway_Module_4	hsa05418	Fluid shear stress and atherosclerosis	2/107	139/7469	0.596091	0.718366	0.466576	4790/7124	2
KEGG_Pathway_Module_4	hsa04664	Fc epsilon RI signaling pathway	1/107	68/7469	0.626809	0.748984	0.486462	7124	1
KEGG_Pathway_Module_4	hsa04921	Oxytocin signaling pathway	2/107	152/7469	0.644985	0.764225	0.496361	1026/595	2
KEGG_Pathway_Module_4	hsa04217	Necroptosis	2/107	162/7469	0.679364	0.78831	0.512004	329/7124	2
KEGG_Pathway_Module_4	hsa04630	JAK-STAT signaling pathway	2/107	162/7469	0.679364	0.78831	0.512004	1026/595	2
KEGG_Pathway_Module_4	hsa01521	EGFR tyrosine kinase inhibitor resistance	1/107	79/7469	0.682084	0.78831	0.512004	2932	1
KEGG_Pathway_Module_4	hsa05410	Hypertrophic cardiomyopathy (HCM)	1/107	83/7469	0.700104	0.799653	0.519371	7124	1
KEGG_Pathway_Module_4	hsa05010	Alzheimer disease	2/107	171/7469	0.707967	0.799653	0.519371	2932/7124	2
KEGG_Pathway_Module_4	hsa05132	Salmonella infection	1/107	86/7469	0.712951	0.799653	0.519371	4790	1
KEGG_Pathway_Module_4	hsa04211	Longevity regulating pathway	1/107	89/7469	0.725253	0.799653	0.519371	4790	1
KEGG_Pathway_Module_4	hsa05323	Rheumatoid arthritis	1/107	90/7469	0.729237	0.799653	0.519371	7124	1
KEGG_Pathway_Module_4	hsa05414	Dilated cardiomyopathy (DCM)	1/107	90/7469	0.729237	0.799653	0.519371	7124	1
KEGG_Pathway_Module_4	hsa05152	Tuberculosis	2/107	179/7469	0.731597	0.799653	0.519371	4790/7124	2
KEGG_Pathway_Module_4	hsa04640	Hematopoietic cell lineage	1/107	97/7469	0.755564	0.819496	0.532259	7124	1
KEGG_Pathway_Module_4	hsa04024	cAMP signaling pathway	2/107	199/7469	0.783719	0.839289	0.545115	4790/4792	2
KEGG_Pathway_Module_4	hsa04928	Parathyroid hormone synthesis, secretion and action	1/107	106/7469	0.785717	0.839289	0.545115	1026	1
KEGG_Pathway_Module_4	hsa04010	MAPK signaling pathway	3/107	295/7469	0.801086	0.849272	0.551599	4790/4791/7124	3
KEGG_Pathway_Module_4	hsa04140	Autophagy - animal	1/107	128/7469	0.84479	0.887242	0.57626	5516	1
KEGG_Pathway_Module_4	hsa04650	Natural killer cell mediated cytotoxicity	1/107	131/7469	0.851479	0.887242	0.57626	7124	1
KEGG_Pathway_Module_4	hsa05322	Systemic lupus erythematosus	1/107	133/7469	0.855779	0.887242	0.57626	7124	1
KEGG_Pathway_Module_4	hsa04371	Apelin signaling pathway	1/107	137/7469	0.864013	0.889239	0.577557	595	1
KEGG_Pathway_Module_4	hsa05012	Parkinson disease	1/107	142/7469	0.873652	0.892645	0.579769	7317	1
KEGG_Pathway_Module_4	hsa04360	Axon guidance	1/107	175/7469	0.922328	0.935599	0.607668	2932	1
KEGG_Pathway_Module_4	hsa04014	Ras signaling pathway	1/107	232/7469	0.966657	0.973561	0.632324	4790	1
KEGG_Pathway_Module_4	hsa04060	Cytokine-cytokine receptor interaction	1/107	294/7469	0.986811	0.986811	0.64093	7124	1
KEGG_Pathway_Module_5	hsa04962	Vasopressin-regulated water reabsorption	12/55	44/7469	1.25037e-16	3.25095e-15	2.36911e-15	10540/10671/1639/1778/1780/1781/1783/4905/51164/79659/84516/8655	12
KEGG_Pathway_Module_5	hsa04130	SNARE interactions in vesicular transport	9/55	34/7469	1.46261e-12	1.9014e-11	1.38563e-11	10282/10652/51272/53407/55850/662/6811/9527/9570	9
KEGG_Pathway_Module_5	hsa05132	Salmonella infection	10/55	86/7469	4.60186e-10	3.98828e-09	2.90644e-09	147700/1778/1780/1781/1783/3831/64837/7879/79659/89953	10
KEGG_Pathway_Module_5	hsa04144	Endocytosis	10/55	244/7469	9.22853e-06	5.99854e-05	4.37141e-05	26286/375/377/3798/3799/381/55738/7879/84364/8729	10
KEGG_Pathway_Module_5	hsa00510	N-Glycan biosynthesis	5/55	49/7469	2.68127e-05	0.000139426	0.000101606	10905/4121/4122/4124/57134	5
KEGG_Pathway_Module_5	hsa04145	Phagosome	7/55	152/7469	0.000112646	0.000488131	0.000355723	1778/1780/1781/1783/53407/7879/79659	7
KEGG_Pathway_Module_5	hsa05110	Vibrio cholerae infection	4/55	50/7469	0.000471461	0.00175114	0.00127614	10945/11014/11015/375	4
KEGG_Pathway_Module_5	hsa05134	Legionellosis	3/55	55/7469	0.00756463	0.024585	0.0179162	375/5861/81876	3
KEGG_Pathway_Module_5	hsa04721	Synaptic vesicle cycle	2/55	63/7469	0.0782103	0.225941	0.164653	4905/8775	2
KEGG_Pathway_Module_5	hsa04610	Complement and coagulation cascades	2/55	79/7469	0.114677	0.286448	0.208748	1604/966	2
KEGG_Pathway_Module_5	hsa04141	Protein processing in endoplasmic reticulum	3/55	165/7469	0.12119	0.286448	0.208748	10905/4121/57134	3
KEGG_Pathway_Module_5	hsa04640	Hematopoietic cell lineage	2/55	97/7469	0.159733	0.338446	0.246641	1604/966	2
KEGG_Pathway_Module_5	hsa05016	Huntington disease	3/55	193/7469	0.169223	0.338446	0.246641	10540/1639/51164	3
KEGG_Pathway_Module_5	hsa05205	Proteoglycans in cancer	3/55	201/7469	0.18387	0.341472	0.248846	286/287/288	3
KEGG_Pathway_Module_5	hsa04728	Dopaminergic synapse	2/55	131/7469	0.251041	0.435138	0.317104	3798/3799	2
KEGG_Pathway_Module_5	hsa04340	Hedgehog signaling pathway	1/55	47/7469	0.294223	0.478112	0.348422	11127	1
KEGG_Pathway_Module_5	hsa05416	Viral myocarditis	1/55	59/7469	0.354531	0.542224	0.395143	1604	1
KEGG_Pathway_Module_5	hsa04137	Mitophagy - animal	1/55	65/7469	0.382758	0.552873	0.402903	7879	1
KEGG_Pathway_Module_5	hsa04727	GABAergic synapse	1/55	88/7469	0.480164	0.645354	0.470299	4905	1
KEGG_Pathway_Module_5	hsa05146	Amoebiasis	1/55	96/7469	0.51037	0.645354	0.470299	7879	1
KEGG_Pathway_Module_5	hsa04914	Progesterone-mediated oocyte maturation	1/55	99/7469	0.521248	0.645354	0.470299	3835	1
KEGG_Pathway_Module_5	hsa04140	Autophagy - animal	1/55	128/7469	0.614886	0.719004	0.523971	7879	1
KEGG_Pathway_Module_5	hsa04210	Apoptosis	1/55	136/7469	0.637383	0.719004	0.523971	6709	1
KEGG_Pathway_Module_5	hsa04072	Phospholipase D signaling pathway	1/55	146/7469	0.663696	0.719004	0.523971	375	1
KEGG_Pathway_Module_5	hsa05152	Tuberculosis	1/55	179/7469	0.737911	0.767428	0.559259	7879	1
KEGG_Pathway_Module_5	hsa05206	MicroRNAs in cancer	1/55	299/7469	0.895167	0.895167	0.652348	9493	1
KEGG_Pathway_Module_6	hsa04080	Neuroactive ligand-receptor interaction	66/91	277/7469	8.38434e-77	1.11512e-74	7.14876e-75	10316/10800/10886/1128/1131/1133/1241/146/147/148/185/1902/1909/1910/2147/2149/2150/2151/23566/2358/23620/2642/2693/2798/2837/2847/2862/2911/2915/2925/3061/3062/3269/3356/3357/3358/4829/4923/5021/5028/5029/5031/5032/552/553/56413/56923/57105/5724/5731/5737/623/624/64106/680/6865/6869/6870/6915/7201/84539/84634/886/887/9002/9170	66
KEGG_Pathway_Module_6	hsa04020	Calcium signaling pathway	44/91	183/7469	4.43915e-48	2.95204e-46	1.89248e-46	10800/1128/1131/1133/146/147/148/185/1909/1910/2149/23236/2767/2769/2776/2911/2915/2925/3269/3356/3357/3358/4923/5021/5330/5331/5332/552/553/56413/57105/5724/5731/5737/623/624/6865/6869/6870/6915/7201/886/887/9630	44
KEGG_Pathway_Module_6	hsa04750	Inflammatory mediator regulation of TRP channels	14/91	99/7469	9.32531e-12	4.13422e-10	2.65035e-10	2150/23236/2776/3269/3356/3357/3358/5029/5330/5331/5332/623/624/8503	14
KEGG_Pathway_Module_6	hsa04072	Phospholipase D signaling pathway	16/91	146/7469	1.47702e-11	4.91108e-10	3.14838e-10	185/1902/2149/23236/23566/2911/2915/5330/5331/5332/551/552/553/5737/8503/9170	16
KEGG_Pathway_Module_6	hsa04540	Gap junction	12/91	88/7469	4.91395e-10	1.30711e-08	8.37958e-09	1902/23236/2767/2776/2911/2915/3356/3357/3358/5330/5331/5332	12
KEGG_Pathway_Module_6	hsa04270	Vascular smooth muscle contraction	13/91	121/7469	1.82495e-09	4.04531e-08	2.59335e-08	146/147/148/185/1909/23236/2767/2776/5330/5331/5332/552/553	13
KEGG_Pathway_Module_6	hsa04911	Insulin secretion	10/91	85/7469	6.45056e-08	1.15173e-06	7.38347e-07	1131/23236/2641/2767/2776/2864/5330/5331/5332/886	10
KEGG_Pathway_Module_6	hsa04022	cGMP-PKG signaling pathway	13/91	163/7469	6.9277e-08	1.15173e-06	7.38347e-07	146/147/148/185/1909/1910/23236/2767/2776/5330/5331/5332/624	13
KEGG_Pathway_Module_6	hsa05142	Chagas disease (American trypanosomiasis)	10/91	102/7469	3.70778e-07	5.47927e-06	3.51263e-06	23236/2767/2769/2776/5330/5331/5332/624/8503/9630	10
KEGG_Pathway_Module_6	hsa04725	Cholinergic synapse	10/91	112/7469	8.91794e-07	1.18609e-05	7.60372e-06	1128/1131/1133/23236/2767/2776/5330/5331/5332/8503	10
KEGG_Pathway_Module_6	hsa04924	Renin secretion	8/91	65/7469	1.01748e-06	1.23023e-05	7.88668e-06	183/185/1909/23236/2776/5330/5331/5332	8
KEGG_Pathway_Module_6	hsa04970	Salivary secretion	9/91	90/7469	1.24648e-06	1.38151e-05	8.85654e-06	1131/146/147/148/23236/2776/5330/5331/5332	9
KEGG_Pathway_Module_6	hsa04912	GnRH signaling pathway	9/91	93/7469	1.64762e-06	1.68565e-05	1.08063e-05	23236/2767/2776/2796/2797/2798/5330/5331/5332	9
KEGG_Pathway_Module_6	hsa04611	Platelet activation	10/91	123/7469	2.11876e-06	1.91134e-05	1.22531e-05	2149/23236/2776/5028/5330/5331/5332/6915/8503/9002	10
KEGG_Pathway_Module_6	hsa05146	Amoebiasis	9/91	96/7469	2.15564e-06	1.91134e-05	1.22531e-05	23236/2767/2769/2776/5330/5331/5332/8503/9630	9
KEGG_Pathway_Module_6	hsa04971	Gastric acid secretion	8/91	75/7469	3.07947e-06	2.55981e-05	1.64103e-05	1131/23236/2520/2776/5330/5331/5332/887	8
KEGG_Pathway_Module_6	hsa05143	African trypanosomiasis	6/91	35/7469	3.38405e-06	2.64752e-05	1.69726e-05	2150/23236/2776/5330/5331/5332	6
KEGG_Pathway_Module_6	hsa04610	Complement and coagulation cascades	8/91	79/7469	4.57657e-06	3.38158e-05	2.16785e-05	1361/2147/2149/2151/3827/623/624/9002	8
KEGG_Pathway_Module_6	hsa04015	Rap1 signaling pathway	12/91	206/7469	6.53908e-06	4.57736e-05	2.93444e-05	1902/2149/23236/23566/2776/5028/5330/5331/5332/8503/9002/9170	12
KEGG_Pathway_Module_6	hsa04730	Long-term depression	7/91	60/7469	7.21472e-06	4.79779e-05	3.07575e-05	23236/2767/2776/2911/5330/5331/5332	7
KEGG_Pathway_Module_6	hsa04927	Cortisol synthesis and secretion	7/91	64/7469	1.11556e-05	7.0652e-05	4.52933e-05	185/23236/2767/2776/5330/5331/5332	7
KEGG_Pathway_Module_6	hsa04720	Long-term potentiation	7/91	67/7469	1.51612e-05	9.16563e-05	5.87587e-05	23236/2776/2911/2915/5330/5331/5332	7
KEGG_Pathway_Module_6	hsa04972	Pancreatic secretion	8/91	96/7469	1.96494e-05	0.000110323	7.07254e-05	1131/1361/23236/2776/5330/5331/5332/886	8
KEGG_Pathway_Module_6	hsa04961	Endocrine and other factor-regulated calcium reabsorption	6/91	47/7469	1.99079e-05	0.000110323	7.07254e-05	23236/2776/5330/5331/5332/624	6
KEGG_Pathway_Module_6	hsa04261	Adrenergic signaling in cardiomyocytes	9/91	144/7469	5.86201e-05	0.000311859	0.000199925	146/147/148/185/23236/2776/5330/5331/5332	9
KEGG_Pathway_Module_6	hsa04724	Glutamatergic synapse	8/91	114/7469	6.82148e-05	0.000348945	0.0002237	23236/2776/2911/2915/5330/5331/5332/156	8
KEGG_Pathway_Module_6	hsa04726	Serotonergic synapse	8/91	115/7469	7.25914e-05	0.00035758	0.000229236	23236/2776/3356/3357/3358/5330/5331/5332	8
KEGG_Pathway_Module_6	hsa04925	Aldosterone synthesis and secretion	7/91	96/7469	0.000156118	0.000741559	0.000475396	185/23236/2767/2776/5330/5331/5332	7
KEGG_Pathway_Module_6	hsa04926	Relaxin signaling pathway	8/91	130/7469	0.000171785	0.000787841	0.000505066	1906/1910/23236/2769/5330/5331/5332/8503	8
KEGG_Pathway_Module_6	hsa04933	AGE-RAGE signaling pathway in diabetic complications	7/91	99/7469	0.000189313	0.000839289	0.000538048	185/1906/23236/5330/5331/5332/8503	7
KEGG_Pathway_Module_6	hsa04916	Melanogenesis	7/91	101/7469	0.000214456	0.000920086	0.000589845	1906/1910/23236/2776/5330/5331/5332	7
KEGG_Pathway_Module_6	hsa04922	Glucagon signaling pathway	7/91	103/7469	0.000242231	0.000992529	0.000636287	23236/2641/2642/2776/5330/5331/5332	7
KEGG_Pathway_Module_6	hsa04810	Regulation of actin cytoskeleton	10/91	213/7469	0.000246267	0.000992529	0.000636287	1128/1131/1133/1902/2147/2149/623/624/8503/9170	10
KEGG_Pathway_Module_6	hsa04928	Parathyroid hormone synthesis, secretion and action	7/91	106/7469	0.000289267	0.00113154	0.000725406	23236/2767/2776/5330/5331/5332/846	7
KEGG_Pathway_Module_6	hsa04071	Sphingolipid signaling pathway	7/91	118/7469	0.000556115	0.00211324	0.00135475	23236/2776/5330/5331/5332/624/8503	7
KEGG_Pathway_Module_6	hsa04915	Estrogen signaling pathway	7/91	137/7469	0.00134604	0.00497289	0.003188	23236/2776/2911/5330/5331/5332/8503	7
KEGG_Pathway_Module_6	hsa04918	Thyroid hormone synthesis	5/91	74/7469	0.00199825	0.00715919	0.00458959	23236/2776/5330/5331/5332	5
KEGG_Pathway_Module_6	hsa04062	Chemokine signaling pathway	8/91	189/7469	0.00204969	0.00715919	0.00458959	23236/2869/5330/5331/5332/6375/8503/156	8
KEGG_Pathway_Module_6	hsa04723	Retrograde endocannabinoid signaling	7/91	148/7469	0.00209931	0.00715919	0.00458959	23236/2776/2911/2915/5330/5331/5332	7
KEGG_Pathway_Module_6	hsa04921	Oxytocin signaling pathway	7/91	152/7469	0.00244223	0.00812043	0.00520582	23236/2776/5020/5021/5330/5331/5332	7
KEGG_Pathway_Module_6	hsa04934	Cushing syndrome	7/91	154/7469	0.00262915	0.00852871	0.00546755	185/23236/2767/2776/5330/5331/5332	7
KEGG_Pathway_Module_6	hsa05163	Human cytomegalovirus infection	8/91	225/7469	0.00593859	0.0188055	0.0120558	23236/2767/2776/5330/5331/5332/5731/8503	8
KEGG_Pathway_Module_6	hsa04713	Circadian entrainment	5/91	96/7469	0.00615208	0.0190285	0.0121987	23236/2776/5330/5331/5332	5
KEGG_Pathway_Module_6	hsa04371	Apelin signaling pathway	6/91	137/7469	0.00635548	0.0192109	0.0123156	185/23236/2776/5330/5331/5332	6
KEGG_Pathway_Module_6	hsa04070	Phosphatidylinositol signaling system	5/91	99/7469	0.00699702	0.0206801	0.0132575	23236/5330/5331/5332/8503	5
KEGG_Pathway_Module_6	hsa04024	cAMP signaling pathway	7/91	199/7469	0.0105147	0.0304013	0.0194895	1128/1909/2149/2693/2867/5021/8503	7
KEGG_Pathway_Module_6	hsa00562	Inositol phosphate metabolism	4/91	74/7469	0.0124056	0.0351053	0.0225052	23236/5330/5331/5332	4
KEGG_Pathway_Module_6	hsa04919	Thyroid hormone signaling pathway	5/91	116/7469	0.0133618	0.0370233	0.0237348	23236/5330/5331/5332/8503	5
KEGG_Pathway_Module_6	hsa04742	Taste transduction	4/91	83/7469	0.0182471	0.0495278	0.0317511	1131/2911/5028/5330	4
KEGG_Pathway_Module_6	hsa04728	Dopaminergic synapse	5/91	131/7469	0.0215281	0.0572648	0.0367111	23236/2776/5330/5331/5332	5
KEGG_Pathway_Module_6	hsa05016	Huntington disease	6/91	193/7469	0.0299699	0.0781567	0.0501044	23236/2776/2915/5330/5331/5332	6
KEGG_Pathway_Module_6	hsa04614	Renin-angiotensin system	2/91	23/7469	0.0314663	0.0804812	0.0515946	183/185	2
KEGG_Pathway_Module_6	hsa04621	NOD-like receptor signaling pathway	5/91	168/7469	0.053761	0.13491	0.0864874	23236/5330/5331/5332/846	5
KEGG_Pathway_Module_6	hsa05010	Alzheimer disease	5/91	171/7469	0.0571817	0.140836	0.0902869	23236/2776/5330/5331/5332	5
KEGG_Pathway_Module_6	hsa04973	Carbohydrate digestion and absorption	2/91	44/7469	0.0999929	0.241801	0.155013	5330/8503	2
KEGG_Pathway_Module_6	hsa04310	Wnt signaling pathway	4/91	149/7469	0.108042	0.256601	0.164501	23236/5330/5331/5332	4
KEGG_Pathway_Module_6	hsa05150	Staphylococcus aureus infection	2/91	56/7469	0.148559	0.346639	0.222222	2358/5724	2
KEGG_Pathway_Module_6	hsa04151	PI3K-Akt signaling pathway	6/91	354/7469	0.26189	0.60054	0.384992	1128/1902/2149/23566/8503/9170	6
KEGG_Pathway_Module_6	hsa05032	Morphine addiction	2/91	91/7469	0.304616	0.686676	0.440212	2869/156	2
KEGG_Pathway_Module_6	hsa04066	HIF-1 signaling pathway	2/91	100/7469	0.344983	0.764712	0.490239	1906/8503	2
KEGG_Pathway_Module_6	hsa04960	Aldosterone-regulated sodium reabsorption	1/91	37/7469	0.365342	0.796565	0.510659	8503	1
KEGG_Pathway_Module_6	hsa04668	TNF signaling pathway	2/91	110/7469	0.388942	0.834342	0.534877	1906/8503	2
KEGG_Pathway_Module_6	hsa04962	Vasopressin-regulated water reabsorption	1/91	44/7469	0.417801	0.882025	0.565445	551	1
KEGG_Pathway_Module_6	hsa04152	AMPK signaling pathway	2/91	120/7469	0.431592	0.883909	0.566653	148/8503	2
KEGG_Pathway_Module_6	hsa04930	Type II diabetes mellitus	1/91	46/7469	0.431985	0.883909	0.566653	8503	1
KEGG_Pathway_Module_6	hsa04340	Hedgehog signaling pathway	1/91	47/7469	0.438949	0.884548	0.567063	156	1
KEGG_Pathway_Module_6	hsa05170	Human immunodeficiency virus 1 infection	3/91	212/7469	0.480264	0.92223	0.59122	2767/2776/8503	3
KEGG_Pathway_Module_6	hsa04068	FoxO signaling pathway	2/91	132/7469	0.480653	0.92223	0.59122	2911/8503	2
KEGG_Pathway_Module_6	hsa05162	Measles	2/91	132/7469	0.480653	0.92223	0.59122	6869/8503	2
KEGG_Pathway_Module_6	hsa04923	Regulation of lipolysis in adipocytes	1/91	54/7469	0.485384	0.92223	0.59122	8503	1
KEGG_Pathway_Module_6	hsa05418	Fluid shear stress and atherosclerosis	2/91	139/7469	0.508074	0.929407	0.595821	1906/8503	2
KEGG_Pathway_Module_6	hsa05213	Endometrial cancer	1/91	58/7469	0.51019	0.929407	0.595821	8503	1
KEGG_Pathway_Module_6	hsa04370	VEGF signaling pathway	1/91	59/7469	0.516205	0.929407	0.595821	8503	1
KEGG_Pathway_Module_6	hsa04213	Longevity regulating pathway - multiple species	1/91	62/7469	0.533813	0.929407	0.595821	8503	1
KEGG_Pathway_Module_6	hsa05230	Central carbon metabolism in cancer	1/91	65/7469	0.550787	0.929407	0.595821	8503	1
KEGG_Pathway_Module_6	hsa05221	Acute myeloid leukemia	1/91	66/7469	0.556308	0.929407	0.595821	8503	1
KEGG_Pathway_Module_6	hsa05223	Non-small cell lung cancer	1/91	66/7469	0.556308	0.929407	0.595821	8503	1
KEGG_Pathway_Module_6	hsa04664	Fc epsilon RI signaling pathway	1/91	68/7469	0.56715	0.929407	0.595821	8503	1
KEGG_Pathway_Module_6	hsa05211	Renal cell carcinoma	1/91	69/7469	0.572472	0.929407	0.595821	8503	1
KEGG_Pathway_Module_6	hsa04917	Prolactin signaling pathway	1/91	70/7469	0.57773	0.929407	0.595821	8503	1
KEGG_Pathway_Module_6	hsa04662	B cell receptor signaling pathway	1/91	71/7469	0.582923	0.929407	0.595821	8503	1
KEGG_Pathway_Module_6	hsa05214	Glioma	1/91	71/7469	0.582923	0.929407	0.595821	8503	1
KEGG_Pathway_Module_6	hsa05218	Melanoma	1/91	72/7469	0.588053	0.929407	0.595821	8503	1
KEGG_Pathway_Module_6	hsa01524	Platinum drug resistance	1/91	73/7469	0.593121	0.929407	0.595821	8503	1
KEGG_Pathway_Module_6	hsa05100	Bacterial invasion of epithelial cells	1/91	74/7469	0.598128	0.929407	0.595821	8503	1
KEGG_Pathway_Module_6	hsa05212	Pancreatic cancer	1/91	75/7469	0.603073	0.929407	0.595821	8503	1
KEGG_Pathway_Module_6	hsa05220	Chronic myeloid leukemia	1/91	76/7469	0.607958	0.929407	0.595821	8503	1
KEGG_Pathway_Module_6	hsa01521	EGFR tyrosine kinase inhibitor resistance	1/91	79/7469	0.622259	0.94046	0.602907	8503	1
KEGG_Pathway_Module_6	hsa04012	ErbB signaling pathway	1/91	85/7469	0.649332	0.952097	0.610367	8503	1
KEGG_Pathway_Module_6	hsa05210	Colorectal cancer	1/91	86/7469	0.653653	0.952097	0.610367	8503	1
KEGG_Pathway_Module_6	hsa04211	Longevity regulating pathway	1/91	89/7469	0.666305	0.952097	0.610367	8503	1
KEGG_Pathway_Module_6	hsa04974	Protein digestion and absorption	1/91	90/7469	0.670419	0.952097	0.610367	1361	1
KEGG_Pathway_Module_6	hsa04666	Fc gamma R-mediated phagocytosis	1/91	91/7469	0.674484	0.952097	0.610367	8503	1
KEGG_Pathway_Module_6	hsa05222	Small cell lung cancer	1/91	93/7469	0.682465	0.952097	0.610367	8503	1
KEGG_Pathway_Module_6	hsa05215	Prostate cancer	1/91	97/7469	0.69785	0.952097	0.610367	8503	1
KEGG_Pathway_Module_6	hsa01522	Endocrine resistance	1/91	98/7469	0.70158	0.952097	0.610367	8503	1
KEGG_Pathway_Module_6	hsa04914	Progesterone-mediated oocyte maturation	1/91	99/7469	0.705264	0.952097	0.610367	8503	1
KEGG_Pathway_Module_6	hsa05231	Choline metabolism in cancer	1/91	99/7469	0.705264	0.952097	0.610367	8503	1
KEGG_Pathway_Module_6	hsa04660	T cell receptor signaling pathway	1/91	101/7469	0.712498	0.952097	0.610367	8503	1
KEGG_Pathway_Module_6	hsa04620	Toll-like receptor signaling pathway	1/91	104/7469	0.723021	0.952097	0.610367	8503	1
KEGG_Pathway_Module_6	hsa04625	C-type lectin receptor signaling pathway	1/91	104/7469	0.723021	0.952097	0.610367	8503	1
KEGG_Pathway_Module_6	hsa04931	Insulin resistance	1/91	107/7469	0.733163	0.955987	0.612861	8503	1
KEGG_Pathway_Module_6	hsa04670	Leukocyte transendothelial migration	1/91	112/7469	0.749256	0.961089	0.616131	8503	1
KEGG_Pathway_Module_6	hsa04722	Neurotrophin signaling pathway	1/91	119/7469	0.770186	0.961089	0.616131	8503	1
KEGG_Pathway_Module_6	hsa04140	Autophagy - animal	1/91	128/7469	0.794574	0.961089	0.616131	8503	1
KEGG_Pathway_Module_6	hsa04380	Osteoclast differentiation	1/91	128/7469	0.794574	0.961089	0.616131	8503	1
KEGG_Pathway_Module_6	hsa04650	Natural killer cell mediated cytotoxicity	1/91	131/7469	0.80212	0.961089	0.616131	8503	1
KEGG_Pathway_Module_6	hsa05160	Hepatitis C	1/91	131/7469	0.80212	0.961089	0.616131	8503	1
KEGG_Pathway_Module_6	hsa04144	Endocytosis	2/91	244/7469	0.803526	0.961089	0.616131	2869/156	2
KEGG_Pathway_Module_6	hsa04210	Apoptosis	1/91	136/7469	0.814092	0.961089	0.616131	8503	1
KEGG_Pathway_Module_6	hsa04910	Insulin signaling pathway	1/91	137/7469	0.816399	0.961089	0.616131	8503	1
KEGG_Pathway_Module_6	hsa04550	Signaling pathways regulating pluripotency of stem cells	1/91	139/7469	0.820929	0.961089	0.616131	8503	1
KEGG_Pathway_Module_6	hsa05161	Hepatitis B	1/91	144/7469	0.831775	0.961089	0.616131	8503	1
KEGG_Pathway_Module_6	hsa05224	Breast cancer	1/91	147/7469	0.837968	0.961089	0.616131	8503	1
KEGG_Pathway_Module_6	hsa04932	Non-alcoholic fatty liver disease (NAFLD)	1/91	149/7469	0.841971	0.961089	0.616131	8503	1
KEGG_Pathway_Module_6	hsa05226	Gastric cancer	1/91	149/7469	0.841971	0.961089	0.616131	8503	1
KEGG_Pathway_Module_6	hsa04150	mTOR signaling pathway	1/91	151/7469	0.845876	0.961089	0.616131	8503	1
KEGG_Pathway_Module_6	hsa04218	Cellular senescence	1/91	160/7469	0.8623	0.961089	0.616131	8503	1
KEGG_Pathway_Module_6	hsa04630	JAK-STAT signaling pathway	1/91	162/7469	0.865707	0.961089	0.616131	8503	1
KEGG_Pathway_Module_6	hsa05225	Hepatocellular carcinoma	1/91	168/7469	0.875438	0.961089	0.616131	8503	1
KEGG_Pathway_Module_6	hsa05164	Influenza A	1/91	171/7469	0.880038	0.961089	0.616131	8503	1
KEGG_Pathway_Module_6	hsa04360	Axon guidance	1/91	175/7469	0.885912	0.961089	0.616131	8503	1
KEGG_Pathway_Module_6	hsa05167	Kaposi sarcoma-associated herpesvirus infection	1/91	186/7469	0.900637	0.961089	0.616131	8503	1
KEGG_Pathway_Module_6	hsa04510	Focal adhesion	1/91	199/7469	0.915632	0.961089	0.616131	8503	1
KEGG_Pathway_Module_6	hsa05169	Epstein-Barr virus infection	1/91	201/7469	0.917731	0.961089	0.616131	8503	1
KEGG_Pathway_Module_6	hsa05203	Viral carcinogenesis	1/91	201/7469	0.917731	0.961089	0.616131	8503	1
KEGG_Pathway_Module_6	hsa05205	Proteoglycans in cancer	1/91	201/7469	0.917731	0.961089	0.616131	8503	1
KEGG_Pathway_Module_6	hsa05166	Human T-cell leukemia virus 1 infection	1/91	219/7469	0.934442	0.966171	0.619389	8503	1
KEGG_Pathway_Module_6	hsa04714	Thermogenesis	1/91	229/7469	0.942226	0.966171	0.619389	2641	1
KEGG_Pathway_Module_6	hsa04014	Ras signaling pathway	1/91	232/7469	0.944378	0.966171	0.619389	8503	1
KEGG_Pathway_Module_6	hsa04060	Cytokine-cytokine receptor interaction	1/91	294/7469	0.974703	0.989584	0.634399	6375	1
KEGG_Pathway_Module_6	hsa05165	Human papillomavirus infection	1/91	339/7469	0.985782	0.99325	0.636749	8503	1
KEGG_Pathway_Module_6	hsa04740	Olfactory transduction	1/91	448/7469	0.996532	0.996532	0.638853	156	1
KEGG_Pathway_Module_7	hsa05168	Herpes simplex infection	23/62	185/7469	7.47075e-22	5.08011e-20	1.96599e-20	10379/3105/3106/3107/3113/3115/3118/3122/3123/3127/3133/3134/3135/3434/3661/3665/4938/4939/4940/5371/6041/6672/6773	23
KEGG_Pathway_Module_7	hsa05169	Epstein-Barr virus infection	23/62	201/7469	5.2185e-21	1.77429e-19	6.86645e-20	10379/3105/3106/3107/3113/3115/3118/3122/3123/3127/3133/3134/3135/3383/3661/3665/4938/4939/4940/567/6773/960/9636	23
KEGG_Pathway_Module_7	hsa05164	Influenza A	21/62	171/7469	8.50102e-20	1.9269e-18	7.45704e-19	103/10379/3113/3115/3118/3122/3123/3127/3383/3661/3665/4261/4599/4938/4939/4940/5371/6041/6773/7706/91543	21
KEGG_Pathway_Module_7	hsa04612	Antigen processing and presentation	15/62	77/7469	2.39761e-17	4.07594e-16	1.57737e-16	10437/3105/3106/3107/3113/3115/3118/3122/3123/3127/3133/3134/3135/4261/567	15
KEGG_Pathway_Module_7	hsa05330	Allograft rejection	12/62	38/7469	7.97801e-17	1.08501e-15	4.19895e-16	3105/3106/3107/3113/3115/3118/3122/3123/3127/3133/3134/3135	12
KEGG_Pathway_Module_7	hsa05332	Graft-versus-host disease	12/62	41/7469	2.28441e-16	2.589e-15	1.00194e-15	3105/3106/3107/3113/3115/3118/3122/3123/3127/3133/3134/3135	12
KEGG_Pathway_Module_7	hsa04940	Type I diabetes mellitus	12/62	43/7469	4.3813e-16	4.25612e-15	1.64711e-15	3105/3106/3107/3113/3115/3118/3122/3123/3127/3133/3134/3135	12
KEGG_Pathway_Module_7	hsa05416	Viral myocarditis	13/62	59/7469	7.08839e-16	6.02513e-15	2.33171e-15	3105/3106/3107/3113/3115/3118/3122/3123/3127/3133/3134/3135/3383	13
KEGG_Pathway_Module_7	hsa05320	Autoimmune thyroid disease	12/62	53/7469	7.16022e-15	5.40995e-14	2.09363e-14	3105/3106/3107/3113/3115/3118/3122/3123/3127/3133/3134/3135	12
KEGG_Pathway_Module_7	hsa04514	Cell adhesion molecules (CAMs)	15/62	144/7469	3.88257e-13	2.64015e-12	1.02173e-12	3105/3106/3107/3113/3115/3118/3122/3123/3127/3133/3134/3135/3383/4684/7412	15
KEGG_Pathway_Module_7	hsa04621	NOD-like receptor signaling pathway	14/62	168/7469	5.61756e-11	3.47268e-10	1.34391e-10	10379/115361/115362/2633/2634/2635/3661/3665/388646/4938/4939/4940/6041/6773	14
KEGG_Pathway_Module_7	hsa05166	Human T-cell leukemia virus 1 infection	15/62	219/7469	1.73308e-10	9.82077e-10	3.80061e-10	1958/3105/3106/3107/3113/3115/3118/3122/3123/3127/3133/3134/3135/3383/567	15
KEGG_Pathway_Module_7	hsa04145	Phagosome	13/62	152/7469	2.16011e-10	1.1299e-09	4.37269e-10	2209/3105/3106/3107/3113/3115/3118/3122/3123/3127/3133/3134/3135	13
KEGG_Pathway_Module_7	hsa04380	Osteoclast differentiation	11/62	128/7469	5.88593e-09	2.85888e-08	1.10638e-08	10379/10859/11006/11024/11026/11027/2209/23547/353514/6773/79168	11
KEGG_Pathway_Module_7	hsa05150	Staphylococcus aureus infection	8/62	56/7469	1.47191e-08	6.67265e-08	2.58229e-08	2209/3113/3115/3118/3122/3123/3127/3383	8
KEGG_Pathway_Module_7	hsa05160	Hepatitis C	10/62	131/7469	9.67843e-08	4.11333e-07	1.59185e-07	10379/3434/3659/3661/3665/4938/4939/4940/6041/6773	10
KEGG_Pathway_Module_7	hsa05310	Asthma	6/62	31/7469	1.60077e-07	6.40307e-07	2.47797e-07	3113/3115/3118/3122/3123/3127	6
KEGG_Pathway_Module_7	hsa05167	Kaposi sarcoma-associated herpesvirus infection	11/62	186/7469	2.85765e-07	1.07956e-06	4.17785e-07	10379/3105/3106/3107/3133/3134/3135/3383/3661/3665/6773	11
KEGG_Pathway_Module_7	hsa05170	Human immunodeficiency virus 1 infection	11/62	212/7469	1.06017e-06	3.7943e-06	1.46838e-06	25939/3105/3106/3107/3133/3134/3135/3661/567/684/85363	11
KEGG_Pathway_Module_7	hsa04640	Hematopoietic cell lineage	8/62	97/7469	1.14859e-06	3.80666e-06	1.47317e-06	2209/3113/3115/3118/3122/3123/3127/960	8
KEGG_Pathway_Module_7	hsa05162	Measles	9/62	132/7469	1.17559e-06	3.80666e-06	1.47317e-06	103/10379/3661/3665/4599/4938/4939/4940/6773	9
KEGG_Pathway_Module_7	hsa05140	Leishmaniasis	7/62	74/7469	2.23575e-06	6.9105e-06	2.67434e-06	2209/3113/3115/3118/3122/3123/3127	7
KEGG_Pathway_Module_7	hsa04672	Intestinal immune network for IgA production	6/62	49/7469	2.70711e-06	8.00362e-06	3.09738e-06	3113/3115/3118/3122/3123/3127	6
KEGG_Pathway_Module_7	hsa05165	Human papillomavirus infection	13/62	339/7469	3.04415e-06	8.6251e-06	3.33789e-06	10379/3105/3106/3107/3133/3134/3135/3659/3661/4599/6773/8638/9636	13
KEGG_Pathway_Module_7	hsa05203	Viral carcinogenesis	10/62	201/7469	5.05754e-06	1.37565e-05	5.32373e-06	10379/3105/3106/3107/3133/3134/3135/3661/3665/6672	10
KEGG_Pathway_Module_7	hsa05323	Rheumatoid arthritis	7/62	90/7469	8.36873e-06	2.18874e-05	8.47037e-06	3113/3115/3118/3122/3123/3127/3383	7
KEGG_Pathway_Module_7	hsa05322	Systemic lupus erythematosus	8/62	133/7469	1.23328e-05	3.10603e-05	1.20202e-05	2209/3113/3115/3118/3122/3123/3127/6737	8
KEGG_Pathway_Module_7	hsa05321	Inflammatory bowel disease (IBD)	6/62	65/7469	1.44235e-05	3.50285e-05	1.35559e-05	3113/3115/3118/3122/3123/3127	6
KEGG_Pathway_Module_7	hsa04659	Th17 cell differentiation	7/62	107/7469	2.61632e-05	6.13483e-05	2.37416e-05	3113/3115/3118/3122/3123/3127/3662	7
KEGG_Pathway_Module_7	hsa05145	Toxoplasmosis	7/62	113/7469	3.72729e-05	8.44853e-05	3.26955e-05	3113/3115/3118/3122/3123/3127/4261	7
KEGG_Pathway_Module_7	hsa05152	Tuberculosis	8/62	179/7469	0.000104193	0.000222365	8.60545e-05	2209/3113/3115/3118/3122/3123/3127/4261	8
KEGG_Pathway_Module_7	hsa04658	Th1 and Th2 cell differentiation	6/62	92/7469	0.000104642	0.000222365	8.60545e-05	3113/3115/3118/3122/3123/3127	6
KEGG_Pathway_Module_7	hsa05163	Human cytomegalovirus infection	8/62	225/7469	0.000497838	0.00102585	0.000397	3105/3106/3107/3133/3134/3135/3661/567	8
KEGG_Pathway_Module_7	hsa04650	Natural killer cell mediated cytotoxicity	6/62	131/7469	0.000713655	0.00142731	0.000552365	3105/3106/3107/3133/3135/3383	6
KEGG_Pathway_Module_7	hsa04218	Cellular senescence	6/62	160/7469	0.00200887	0.00390294	0.00151043	3105/3106/3107/3133/3134/3135	6
KEGG_Pathway_Module_7	hsa04622	RIG-I-like receptor signaling pathway	4/62	70/7469	0.00262152	0.00495177	0.00191632	3661/3665/7706/9636	4
KEGG_Pathway_Module_7	hsa04144	Endocytosis	7/62	244/7469	0.00387271	0.0071174	0.00275441	3105/3106/3107/3133/3134/3135/5371	7
KEGG_Pathway_Module_7	hsa04623	Cytosolic DNA-sensing pathway	3/62	63/7469	0.0151938	0.0271889	0.010522	103/3661/3665	3
KEGG_Pathway_Module_7	hsa05133	Pertussis	3/62	76/7469	0.0249372	0.0434802	0.0168267	3394/3659/3661	3
KEGG_Pathway_Module_7	hsa05020	Prion diseases	2/62	35/7469	0.0338464	0.0561355	0.0217243	1958/4684	2
KEGG_Pathway_Module_7	hsa05143	African trypanosomiasis	2/62	35/7469	0.0338464	0.0561355	0.0217243	3383/7412	2
KEGG_Pathway_Module_7	hsa04064	NF-kappa B signaling pathway	3/62	95/7469	0.0439861	0.0712155	0.0275602	3383/7412/7706	3
KEGG_Pathway_Module_7	hsa04933	AGE-RAGE signaling pathway in diabetic complications	3/62	99/7469	0.0487081	0.0770267	0.0298091	1958/3383/7412	3
KEGG_Pathway_Module_7	hsa04620	Toll-like receptor signaling pathway	3/62	104/7469	0.054947	0.083031	0.0321328	3661/3663/3665	3
KEGG_Pathway_Module_7	hsa04625	C-type lectin receptor signaling pathway	3/62	104/7469	0.054947	0.083031	0.0321328	10379/3659/6773	3
KEGG_Pathway_Module_7	hsa05144	Malaria	2/62	49/7469	0.06216	0.0910259	0.0352267	3383/7412	2
KEGG_Pathway_Module_7	hsa04668	TNF signaling pathway	3/62	110/7469	0.0629149	0.0910259	0.0352267	3383/3659/7412	3
KEGG_Pathway_Module_7	hsa05221	Acute myeloid leukemia	2/62	66/7469	0.103798	0.147047	0.0569066	2209/5371	2
KEGG_Pathway_Module_7	hsa05161	Hepatitis B	3/62	144/7469	0.11705	0.162437	0.0628626	3661/3665/6773	3
KEGG_Pathway_Module_7	hsa04670	Leukocyte transendothelial migration	2/62	112/7469	0.238068	0.323772	0.125299	3383/7412	2
KEGG_Pathway_Module_7	hsa05340	Primary immunodeficiency	1/62	37/7469	0.265942	0.354589	0.137225	4261	1
KEGG_Pathway_Module_7	hsa05418	Fluid shear stress and atherosclerosis	2/62	139/7469	0.321352	0.42023	0.162628	3383/7412	2
KEGG_Pathway_Module_7	hsa04978	Mineral absorption	1/62	51/7469	0.347244	0.445521	0.172415	4502	1
KEGG_Pathway_Module_7	hsa04217	Necroptosis	2/62	162/7469	0.390747	0.483106	0.18696	10379/6773	2
KEGG_Pathway_Module_7	hsa04630	JAK-STAT signaling pathway	2/62	162/7469	0.390747	0.483106	0.18696	10379/6773	2
KEGG_Pathway_Module_7	hsa05131	Shigellosis	1/62	65/7469	0.419671	0.5096	0.197214	960	1
KEGG_Pathway_Module_7	hsa04917	Prolactin signaling pathway	1/62	70/7469	0.443572	0.525516	0.203373	3659	1
KEGG_Pathway_Module_7	hsa04662	B cell receptor signaling pathway	1/62	71/7469	0.448234	0.525516	0.203373	8519	1
KEGG_Pathway_Module_7	hsa05202	Transcriptional misregulation in cancer	2/62	186/7469	0.459769	0.529904	0.205071	2209/5371	2
KEGG_Pathway_Module_7	hsa04512	ECM-receptor interaction	1/62	82/7469	0.497053	0.563327	0.218006	960	1
KEGG_Pathway_Module_7	hsa04666	Fc gamma R-mediated phagocytosis	1/62	91/7469	0.533813	0.59403	0.229888	2209	1
KEGG_Pathway_Module_7	hsa04912	GnRH signaling pathway	1/62	93/7469	0.541616	0.59403	0.229888	1958	1
KEGG_Pathway_Module_7	hsa04928	Parathyroid hormone synthesis, secretion and action	1/62	106/7469	0.589292	0.636061	0.246154	1958	1
KEGG_Pathway_Module_7	hsa04120	Ubiquitin mediated proteolysis	1/62	137/7469	0.68417	0.715747	0.276992	5371	1
KEGG_Pathway_Module_7	hsa04371	Apelin signaling pathway	1/62	137/7469	0.68417	0.715747	0.276992	1958	1
KEGG_Pathway_Module_7	hsa04062	Chemokine signaling pathway	1/62	189/7469	0.797231	0.821389	0.317875	6773	1
KEGG_Pathway_Module_7	hsa05205	Proteoglycans in cancer	1/62	201/7469	0.817024	0.829218	0.320905	960	1
KEGG_Pathway_Module_7	hsa05206	MicroRNAs in cancer	1/62	299/7469	0.921421	0.921421	0.356587	960	1
KEGG_Pathway_Module_8	hsa04144	Endocytosis	37/80	244/7469	1.70727e-34	2.09994e-32	1.74321e-32	10092/10093/10094/10109/10552/1173/1175/1211/1212/1213/160/1601/161/163/1759/1785/1956/2060/26119/273/274/29924/3482/3949/408/409/5868/5869/5878/6455/6456/7037/81873/8218/867/8976/9829	37
KEGG_Pathway_Module_8	hsa05100	Bacterial invasion of epithelial cells	15/80	74/7469	7.86482e-16	4.83686e-14	4.0152e-14	10092/10093/10094/10109/10552/1211/1212/1213/1759/1785/2017/81873/8218/867/8976	15
KEGG_Pathway_Module_8	hsa04721	Synaptic vesicle cycle	14/80	63/7469	1.96904e-15	8.07305e-14	6.70164e-14	1173/1175/1211/1212/1213/160/161/163/1759/1785/6572/6844/6857/8218	14
KEGG_Pathway_Module_8	hsa04961	Endocrine and other factor-regulated calcium reabsorption	11/80	47/7469	1.33784e-12	4.11384e-11	3.415e-11	1173/1175/1211/1212/1213/160/161/163/1759/1785/8218	11
KEGG_Pathway_Module_8	hsa04142	Lysosome	15/80	123/7469	2.0159e-12	4.9591e-11	4.11667e-11	10053/1174/1211/1212/1213/162/164/2799/3482/4074/6272/8218/8905/8907/950	15
KEGG_Pathway_Module_8	hsa04666	Fc gamma R-mediated phagocytosis	10/80	91/7469	3.56719e-08	7.31274e-07	6.07048e-07	10092/10093/10094/10109/10552/1785/273/274/81873/8976	10
KEGG_Pathway_Module_8	hsa05130	Pathogenic Escherichia coli infection	8/80	55/7469	9.83713e-08	1.72852e-06	1.43489e-06	10092/10093/10094/10109/10552/2017/81873/8976	8
KEGG_Pathway_Module_8	hsa05131	Shigellosis	8/80	65/7469	3.74122e-07	5.75213e-06	4.77498e-06	10092/10093/10094/10109/10552/2017/81873/8976	8
KEGG_Pathway_Module_8	hsa04130	SNARE interactions in vesicular transport	5/80	34/7469	2.71095e-05	0.000370496	0.000307558	6844/6845/8673/8674/9341	5
KEGG_Pathway_Module_8	hsa05132	Salmonella infection	7/80	86/7469	3.3757e-05	0.000415211	0.000344676	10092/10093/10094/10109/10552/81873/8976	7
KEGG_Pathway_Module_8	hsa04962	Vasopressin-regulated water reabsorption	5/80	44/7469	9.73098e-05	0.0010881	0.000903259	554/5868/5869/5878/6844	5
KEGG_Pathway_Module_8	hsa05016	Huntington disease	9/80	193/7469	0.000202681	0.00207748	0.00172457	1173/1175/1211/1212/1213/160/161/163/8218	9
KEGG_Pathway_Module_8	hsa04810	Regulation of actin cytoskeleton	9/80	213/7469	0.000421742	0.00385775	0.00320241	10092/10093/10094/10109/10552/1956/4478/81873/8976	9
KEGG_Pathway_Module_8	hsa04530	Tight junction	8/80	170/7469	0.000439094	0.00385775	0.00320241	10096/10097/1080/2017/4478/57180/653857/8976	8
KEGG_Pathway_Module_8	hsa04722	Neurotrophin signaling pathway	6/80	119/7469	0.00165855	0.0136001	0.0112898	27330/6195/6196/6197/6272/9252	6
KEGG_Pathway_Module_8	hsa05170	Human immunodeficiency virus 1 infection	8/80	212/7469	0.00185052	0.0139917	0.0116148	10053/1174/162/164/8905/8907/915/920	8
KEGG_Pathway_Module_8	hsa04979	Cholesterol metabolism	4/80	50/7469	0.00193381	0.0139917	0.0116148	26119/3949/4036/6272	4
KEGG_Pathway_Module_8	hsa04010	MAPK signaling pathway	9/80	295/7469	0.00408835	0.0279371	0.0231912	1956/27330/408/409/6195/6196/6197/8986/9252	9
KEGG_Pathway_Module_8	hsa04145	Phagosome	6/80	152/7469	0.00560777	0.0345097	0.0286473	4074/5868/5869/5878/7037/9341	6
KEGG_Pathway_Module_8	hsa04720	Long-term potentiation	4/80	67/7469	0.00561133	0.0345097	0.0286473	27330/6195/6196/6197	4
KEGG_Pathway_Module_8	hsa04340	Hedgehog signaling pathway	3/80	47/7469	0.0136806	0.0801294	0.0665174	4036/408/409	3
KEGG_Pathway_Module_8	hsa04914	Progesterone-mediated oocyte maturation	4/80	99/7469	0.0213282	0.119244	0.0989876	27330/6195/6196/6197	4
KEGG_Pathway_Module_8	hsa04150	mTOR signaling pathway	5/80	151/7469	0.0225855	0.120783	0.100265	1856/27330/6195/6196/6197	5
KEGG_Pathway_Module_8	hsa04931	Insulin resistance	4/80	107/7469	0.0274353	0.140606	0.11672	27330/6195/6196/6197	4
KEGG_Pathway_Module_8	hsa00562	Inositol phosphate metabolism	3/80	74/7469	0.0445857	0.211335	0.175434	4952/5286/8867	3
KEGG_Pathway_Module_8	hsa04114	Oocyte meiosis	4/80	125/7469	0.0446724	0.211335	0.175434	27330/6195/6196/6197	4
KEGG_Pathway_Module_8	hsa05340	Primary immunodeficiency	2/80	37/7469	0.0592842	0.270072	0.224193	915/920	2
KEGG_Pathway_Module_8	hsa04216	Ferroptosis	2/80	40/7469	0.0680328	0.291259	0.241781	7018/7037	2
KEGG_Pathway_Module_8	hsa04072	Phospholipase D signaling pathway	4/80	146/7469	0.0709689	0.291259	0.241781	1759/1785/1956/554	4
KEGG_Pathway_Module_8	hsa05219	Bladder cancer	2/80	41/7469	0.0710389	0.291259	0.241781	1956/9252	2
KEGG_Pathway_Module_8	hsa05146	Amoebiasis	3/80	96/7469	0.0833745	0.328252	0.27249	5868/5869/5878	3
KEGG_Pathway_Module_8	hsa04640	Hematopoietic cell lineage	3/80	97/7469	0.0853988	0.328252	0.27249	7037/915/920	3
KEGG_Pathway_Module_8	hsa04070	Phosphatidylinositol signaling system	3/80	99/7469	0.0895103	0.331365	0.275074	4952/5286/8867	3
KEGG_Pathway_Module_8	hsa04066	HIF-1 signaling pathway	3/80	100/7469	0.0915969	0.331365	0.275074	1956/7018/7037	3
KEGG_Pathway_Module_8	hsa04928	Parathyroid hormone synthesis, secretion and action	3/80	106/7469	0.104536	0.367369	0.304962	1956/408/409	3
KEGG_Pathway_Module_8	hsa04926	Relaxin signaling pathway	3/80	130/7469	0.162557	0.555405	0.461055	1956/408/409	3
KEGG_Pathway_Module_8	hsa05205	Proteoglycans in cancer	4/80	201/7469	0.168289	0.559448	0.464411	1956/2017/4478/867	4
KEGG_Pathway_Module_8	hsa04976	Bile secretion	2/80	71/7469	0.176182	0.567773	0.471322	1080/3949	2
KEGG_Pathway_Module_8	hsa04520	Adherens junction	2/80	72/7469	0.180026	0.567773	0.471322	1956/8976	2
KEGG_Pathway_Module_8	hsa00531	Glycosaminoglycan degradation	1/80	19/7469	0.185234	0.569593	0.472833	2799	1
KEGG_Pathway_Module_8	hsa04934	Cushing syndrome	3/80	154/7469	0.228004	0.660593	0.548374	1856/1956/3949	3
KEGG_Pathway_Module_8	hsa04714	Thermogenesis	4/80	229/7469	0.229878	0.660593	0.548374	27330/6195/6196/6197	4
KEGG_Pathway_Module_8	hsa04012	ErbB signaling pathway	2/80	85/7469	0.230939	0.660593	0.548374	1956/867	2
KEGG_Pathway_Module_8	hsa04014	Ras signaling pathway	4/80	232/7469	0.236805	0.661979	0.549524	1956/5868/5869/5878	4
KEGG_Pathway_Module_8	hsa05032	Morphine addiction	2/80	91/7469	0.254793	0.691948	0.574402	408/409	2
KEGG_Pathway_Module_8	hsa04658	Th1 and Th2 cell differentiation	2/80	92/7469	0.258777	0.691948	0.574402	915/920	2
KEGG_Pathway_Module_8	hsa05231	Choline metabolism in cancer	2/80	99/7469	0.286676	0.750237	0.622789	1956/8976	2
KEGG_Pathway_Module_8	hsa04660	T cell receptor signaling pathway	2/80	101/7469	0.294636	0.754301	0.626164	915/920	2
KEGG_Pathway_Module_8	hsa05152	Tuberculosis	3/80	179/7469	0.300494	0.754301	0.626164	5868/5869/5878	3
KEGG_Pathway_Module_8	hsa04659	Th17 cell differentiation	2/80	107/7469	0.318438	0.78123	0.648518	915/920	2
KEGG_Pathway_Module_8	hsa04062	Chemokine signaling pathway	3/80	189/7469	0.329985	0.78123	0.648518	408/409/8976	3
KEGG_Pathway_Module_8	hsa04668	TNF signaling pathway	2/80	110/7469	0.330276	0.78123	0.648518	8986/9252	2
KEGG_Pathway_Module_8	hsa02010	ABC transporters	1/80	44/7469	0.378239	0.868507	0.720969	1080	1
KEGG_Pathway_Module_8	hsa04330	Notch signaling pathway	1/80	48/7469	0.404611	0.868507	0.720969	1856	1
KEGG_Pathway_Module_8	hsa04913	Ovarian steroidogenesis	1/80	49/7469	0.411029	0.868507	0.720969	3949	1
KEGG_Pathway_Module_8	hsa05160	Hepatitis C	2/80	131/7469	0.411199	0.868507	0.720969	1956/3949	2
KEGG_Pathway_Module_8	hsa05162	Measles	2/80	132/7469	0.414944	0.868507	0.720969	4478/915	2
KEGG_Pathway_Module_8	hsa05110	Vibrio cholerae infection	1/80	50/7469	0.41738	0.868507	0.720969	1080	1
KEGG_Pathway_Module_8	hsa04978	Mineral absorption	1/80	51/7469	0.423662	0.868507	0.720969	7018	1
KEGG_Pathway_Module_8	hsa05014	Amyotrophic lateral sclerosis (ALS)	1/80	51/7469	0.423662	0.868507	0.720969	5868	1
KEGG_Pathway_Module_8	hsa04910	Insulin signaling pathway	2/80	137/7469	0.433493	0.874092	0.725605	867/9322	2
KEGG_Pathway_Module_8	hsa04514	Cell adhesion molecules (CAMs)	2/80	144/7469	0.458936	0.891683	0.740208	3897/920	2
KEGG_Pathway_Module_8	hsa05213	Endometrial cancer	1/80	58/7469	0.465805	0.891683	0.740208	1956	1
KEGG_Pathway_Module_8	hsa05224	Breast cancer	2/80	147/7469	0.469642	0.891683	0.740208	1856/1956	2
KEGG_Pathway_Module_8	hsa05226	Gastric cancer	2/80	149/7469	0.47671	0.891683	0.740208	1856/1956	2
KEGG_Pathway_Module_8	hsa05217	Basal cell carcinoma	1/80	63/7469	0.494029	0.891683	0.740208	1856	1
KEGG_Pathway_Module_8	hsa04927	Cortisol synthesis and secretion	1/80	64/7469	0.499495	0.891683	0.740208	3949	1
KEGG_Pathway_Module_8	hsa05230	Central carbon metabolism in cancer	1/80	65/7469	0.504902	0.891683	0.740208	1956	1
KEGG_Pathway_Module_8	hsa05223	Non-small cell lung cancer	1/80	66/7469	0.510251	0.891683	0.740208	1956	1
KEGG_Pathway_Module_8	hsa05120	Epithelial cell signaling in Helicobacter pylori infection	1/80	68/7469	0.52078	0.891683	0.740208	1956	1
KEGG_Pathway_Module_8	hsa05214	Glioma	1/80	71/7469	0.536155	0.891683	0.740208	1956	1
KEGG_Pathway_Module_8	hsa05225	Hepatocellular carcinoma	2/80	168/7469	0.540963	0.891683	0.740208	1856/1956	2
KEGG_Pathway_Module_8	hsa05218	Melanoma	1/80	72/7469	0.54117	0.891683	0.740208	1956	1
KEGG_Pathway_Module_8	hsa04918	Thyroid hormone synthesis	1/80	74/7469	0.551042	0.891683	0.740208	4036	1
KEGG_Pathway_Module_8	hsa04971	Gastric acid secretion	1/80	75/7469	0.555899	0.891683	0.740208	1080	1
KEGG_Pathway_Module_8	hsa05212	Pancreatic cancer	1/80	75/7469	0.555899	0.891683	0.740208	1956	1
KEGG_Pathway_Module_8	hsa05220	Chronic myeloid leukemia	1/80	76/7469	0.560704	0.891683	0.740208	867	1
KEGG_Pathway_Module_8	hsa04612	Antigen processing and presentation	1/80	77/7469	0.565458	0.891683	0.740208	920	1
KEGG_Pathway_Module_8	hsa01521	EGFR tyrosine kinase inhibitor resistance	1/80	79/7469	0.574813	0.894962	0.74293	1956	1
KEGG_Pathway_Module_8	hsa04911	Insulin secretion	1/80	85/7469	0.601702	0.904305	0.750686	6844	1
KEGG_Pathway_Module_8	hsa05210	Colorectal cancer	1/80	86/7469	0.606017	0.904305	0.750686	1956	1
KEGG_Pathway_Module_8	hsa04540	Gap junction	1/80	88/7469	0.61451	0.904305	0.750686	1956	1
KEGG_Pathway_Module_8	hsa04970	Salivary secretion	1/80	90/7469	0.622822	0.904305	0.750686	6844	1
KEGG_Pathway_Module_8	hsa04912	GnRH signaling pathway	1/80	93/7469	0.634958	0.904305	0.750686	1956	1
KEGG_Pathway_Module_8	hsa04713	Circadian entrainment	1/80	96/7469	0.646709	0.904305	0.750686	9252	1
KEGG_Pathway_Module_8	hsa04925	Aldosterone synthesis and secretion	1/80	96/7469	0.646709	0.904305	0.750686	3949	1
KEGG_Pathway_Module_8	hsa04972	Pancreatic secretion	1/80	96/7469	0.646709	0.904305	0.750686	1080	1
KEGG_Pathway_Module_8	hsa05215	Prostate cancer	1/80	97/7469	0.650543	0.904305	0.750686	1956	1
KEGG_Pathway_Module_8	hsa01522	Endocrine resistance	1/80	98/7469	0.654335	0.904305	0.750686	1956	1
KEGG_Pathway_Module_8	hsa04916	Melanogenesis	1/80	101/7469	0.665469	0.90439	0.750756	1856	1
KEGG_Pathway_Module_8	hsa05142	Chagas disease (American trypanosomiasis)	1/80	102/7469	0.669102	0.90439	0.750756	915	1
KEGG_Pathway_Module_8	hsa05166	Human T-cell leukemia virus 1 infection	2/80	219/7469	0.685651	0.914828	0.759421	915/920	2
KEGG_Pathway_Module_8	hsa04670	Leukocyte transendothelial migration	1/80	112/7469	0.703349	0.914828	0.759421	4478	1
KEGG_Pathway_Module_8	hsa04725	Cholinergic synapse	1/80	112/7469	0.703349	0.914828	0.759421	6572	1
KEGG_Pathway_Module_8	hsa05145	Toxoplasmosis	1/80	113/7469	0.706574	0.914828	0.759421	3949	1
KEGG_Pathway_Module_8	hsa04152	AMPK signaling pathway	1/80	120/7469	0.728205	0.930615	0.772526	1080	1
KEGG_Pathway_Module_8	hsa04611	Platelet activation	1/80	123/7469	0.736986	0.930615	0.772526	8673	1
KEGG_Pathway_Module_8	hsa04140	Autophagy - animal	1/80	128/7469	0.751003	0.930615	0.772526	8673	1
KEGG_Pathway_Module_8	hsa04728	Dopaminergic synapse	1/80	131/7469	0.759056	0.930615	0.772526	409	1
KEGG_Pathway_Module_8	hsa04068	FoxO signaling pathway	1/80	132/7469	0.761683	0.930615	0.772526	1956	1
KEGG_Pathway_Module_8	hsa04120	Ubiquitin mediated proteolysis	1/80	137/7469	0.774399	0.930615	0.772526	867	1
KEGG_Pathway_Module_8	hsa04915	Estrogen signaling pathway	1/80	137/7469	0.774399	0.930615	0.772526	1956	1
KEGG_Pathway_Module_8	hsa04550	Signaling pathways regulating pluripotency of stem cells	1/80	139/7469	0.779295	0.930615	0.772526	1856	1
KEGG_Pathway_Module_8	hsa04261	Adrenergic signaling in cardiomyocytes	1/80	144/7469	0.791082	0.932457	0.774055	9252	1
KEGG_Pathway_Module_8	hsa04310	Wnt signaling pathway	1/80	149/7469	0.802247	0.932457	0.774055	1856	1
KEGG_Pathway_Module_8	hsa04921	Oxytocin signaling pathway	1/80	152/7469	0.808661	0.932457	0.774055	1956	1
KEGG_Pathway_Module_8	hsa04390	Hippo signaling pathway	1/80	154/7469	0.812823	0.932457	0.774055	1856	1
KEGG_Pathway_Module_8	hsa04630	JAK-STAT signaling pathway	1/80	162/7469	0.828593	0.932457	0.774055	1956	1
KEGG_Pathway_Module_8	hsa04141	Protein processing in endoplasmic reticulum	1/80	165/7469	0.834162	0.932457	0.774055	81567	1
KEGG_Pathway_Module_8	hsa05206	MicroRNAs in cancer	2/80	299/7469	0.836459	0.932457	0.774055	1956/9252	2
KEGG_Pathway_Module_8	hsa05164	Influenza A	1/80	171/7469	0.84477	0.932457	0.774055	3267	1
KEGG_Pathway_Module_8	hsa04360	Axon guidance	1/80	175/7469	0.851467	0.932457	0.774055	3897	1
KEGG_Pathway_Module_8	hsa04020	Calcium signaling pathway	1/80	183/7469	0.864016	0.932457	0.774055	1956	1
KEGG_Pathway_Module_8	hsa05165	Human papillomavirus infection	2/80	339/7469	0.884449	0.932457	0.774055	1856/1956	2
KEGG_Pathway_Module_8	hsa04024	cAMP signaling pathway	1/80	199/7469	0.886056	0.932457	0.774055	1080	1
KEGG_Pathway_Module_8	hsa04510	Focal adhesion	1/80	199/7469	0.886056	0.932457	0.774055	1956	1
KEGG_Pathway_Module_8	hsa05169	Epstein-Barr virus infection	1/80	201/7469	0.88855	0.932457	0.774055	915	1
KEGG_Pathway_Module_8	hsa04015	Rap1 signaling pathway	1/80	206/7469	0.894552	0.932457	0.774055	1956	1
KEGG_Pathway_Module_8	hsa05163	Human cytomegalovirus infection	1/80	225/7469	0.914586	0.945328	0.78474	1956	1
KEGG_Pathway_Module_8	hsa04080	Neuroactive ligand-receptor interaction	1/80	277/7469	0.952154	0.96832	0.803826	554	1
KEGG_Pathway_Module_8	hsa04740	Olfactory transduction	2/80	448/7469	0.957451	0.96832	0.803826	408/409	2
KEGG_Pathway_Module_8	hsa04060	Cytokine-cytokine receptor interaction	1/80	294/7469	0.960448	0.96832	0.803826	920	1
KEGG_Pathway_Module_8	hsa04151	PI3K-Akt signaling pathway	1/80	354/7469	0.979873	0.979873	0.813416	1956	1
KEGG_Pathway_Module_9	hsa04714	Thermogenesis	52/53	229/7469	2.31871e-80	1.85497e-79	2.44075e-80	126328/137682/25915/29078/374291/4694/4695/4696/4697/4698/4700/4701/4702/4704/4705/4706/4707/4708/4709/4710/4711/4712/4713/4714/4715/4716/4717/4718/4719/4720/4722/4723/4724/4725/4726/4728/4729/4731/51079/51103/54539/55471/55967/79133/91942/4535/4536/4537/4538/4539/4540/4541	52
KEGG_Pathway_Module_9	hsa00190	Oxidative phosphorylation	45/53	133/7469	3.73255e-74	1.49302e-73	1.9645e-74	126328/374291/4694/4695/4696/4697/4698/4700/4701/4702/4704/4705/4706/4707/4708/4709/4710/4711/4712/4713/4714/4715/4716/4717/4718/4719/4720/4722/4723/4724/4725/4726/4728/4729/4731/51079/54539/55967/4535/4536/4537/4538/4539/4540/4541	45
KEGG_Pathway_Module_9	hsa05012	Parkinson disease	45/53	142/7469	1.29188e-72	3.44501e-72	4.53291e-73	126328/374291/4694/4695/4696/4697/4698/4700/4701/4702/4704/4705/4706/4707/4708/4709/4710/4711/4712/4713/4714/4715/4716/4717/4718/4719/4720/4722/4723/4724/4725/4726/4728/4729/4731/51079/54539/55967/4535/4536/4537/4538/4539/4540/4541	45
KEGG_Pathway_Module_9	hsa04723	Retrograde endocannabinoid signaling	45/53	148/7469	1.18254e-71	2.36508e-71	3.11194e-72	126328/374291/4694/4695/4696/4697/4698/4700/4701/4702/4704/4705/4706/4707/4708/4709/4710/4711/4712/4713/4714/4715/4716/4717/4718/4719/4720/4722/4723/4724/4725/4726/4728/4729/4731/51079/54539/55967/4535/4536/4537/4538/4539/4540/4541	45
KEGG_Pathway_Module_9	hsa04932	Non-alcoholic fatty liver disease (NAFLD)	38/53	149/7469	7.79553e-55	1.24728e-54	1.64116e-55	126328/374291/4694/4695/4696/4697/4698/4700/4701/4702/4704/4705/4706/4707/4708/4709/4710/4711/4712/4713/4714/4715/4716/4717/4718/4719/4720/4722/4723/4724/4725/4726/4728/4729/4731/51079/54539/55967	38
KEGG_Pathway_Module_9	hsa05010	Alzheimer disease	38/53	171/7469	2.88111e-52	3.84148e-52	5.05458e-53	126328/374291/4694/4695/4696/4697/4698/4700/4701/4702/4704/4705/4706/4707/4708/4709/4710/4711/4712/4713/4714/4715/4716/4717/4718/4719/4720/4722/4723/4724/4725/4726/4728/4729/4731/51079/54539/55967	38
KEGG_Pathway_Module_9	hsa05016	Huntington disease	38/53	193/7469	4.72637e-50	5.40157e-50	7.10732e-51	126328/374291/4694/4695/4696/4697/4698/4700/4701/4702/4704/4705/4706/4707/4708/4709/4710/4711/4712/4713/4714/4715/4716/4717/4718/4719/4720/4722/4723/4724/4725/4726/4728/4729/4731/51079/54539/55967	38
KEGG_Pathway_Module_9	hsa04010	MAPK signaling pathway	1/53	295/7469	0.882745	0.882745	0.116151	51295	1

## Sheet: dog
Table S4.Enrichment results of functional modules of canine echinococcosis
Module	ID	Description	GeneRatio	BgRatio	pvalue	p.adjust	qvalue	geneID	Count
KEGG_Pathway_Module_1	cfa04916	Melanogenesis	12/102	100/7482	8.30894e-09	1.56208e-06	9.79581e-07	482994/482045/480416/476428/607922/490904/489968/612328/482208/484721/488527/607180	12
KEGG_Pathway_Module_1	cfa04360	Axon guidance	13/102	173/7482	5.37199e-07	5.04967e-05	3.16665e-05	478925/474997/475032/607997/483417/479878/609027/490904/476413/486818/595148/477526/484721	13
KEGG_Pathway_Module_1	cfa04925	Aldosterone synthesis and secretion	9/102	92/7482	3.87696e-06	0.00018117	0.000113611	482994/482045/492238/480416/476428/490273/607922/490904/489968	9
KEGG_Pathway_Module_1	cfa05032	Morphine addiction	9/102	93/7482	4.24429e-06	0.00018117	0.000113611	482994/482045/488422/479540/487221/486975/483996/490904/489968	9
KEGG_Pathway_Module_1	cfa04971	Gastric acid secretion	8/102	72/7482	5.27091e-06	0.00018117	0.000113611	482994/482045/480416/476428/475345/488190/490904/489968	8
KEGG_Pathway_Module_1	cfa04934	Cushing syndrome	11/102	151/7482	5.78201e-06	0.00018117	0.000113611	482994/482045/607922/485839/488422/489542/612328/482208/484721/488527/607180	11
KEGG_Pathway_Module_1	cfa04022	cGMP-PKG signaling pathway	11/102	160/7482	1.00896e-05	0.000270979	0.000169931	482994/482045/492238/480416/476428/607922/102154318/479021/475345/488190/609027	11
KEGG_Pathway_Module_1	cfa04928	Parathyroid hormone synthesis, secretion and action	9/102	107/7482	1.35142e-05	0.000282502	0.000177157	482994/482045/607922/102154318/479021/479540/487221/490904/489968	9
KEGG_Pathway_Module_1	cfa05225	Hepatocellular carcinoma	11/102	165/7482	1.3524e-05	0.000282502	0.000177157	608417/485839/490904/489968/476335/476640/612328/482208/484721/488527/607180	11
KEGG_Pathway_Module_1	cfa05224	Breast cancer	10/102	143/7482	2.25616e-05	0.000424158	0.00026599	485839/403640/403639/485769/475684/612328/482208/484721/488527/607180	10
KEGG_Pathway_Module_1	cfa04720	Long-term potentiation	7/102	66/7482	2.86664e-05	0.000485504	0.000304459	482045/480416/476428/609027/490904/489968/491989	7
KEGG_Pathway_Module_1	cfa04270	Vascular smooth muscle contraction	9/102	119/7482	3.18507e-05	0.000485504	0.000304459	482994/482045/480416/476428/102154318/475345/488190/490904/489968	9
KEGG_Pathway_Module_1	cfa04921	Oxytocin signaling pathway	10/102	150/7482	3.41431e-05	0.000485504	0.000304459	482994/482045/480416/476428/490273/475345/488190/609027/490904/489968	10
KEGG_Pathway_Module_1	cfa04218	Cellular senescence	10/102	151/7482	3.61545e-05	0.000485504	0.000304459	100856315/480416/476428/477302/486338/485839/607023/609027/478149/476413	10
KEGG_Pathway_Module_1	cfa04713	Circadian entrainment	8/102	98/7482	5.17757e-05	0.000648923	0.000406939	482994/482045/480416/476428/607922/490904/489968/489542	8
KEGG_Pathway_Module_1	cfa05205	Proteoglycans in cancer	11/102	196/7482	6.69078e-05	0.000786166	0.000493005	403640/482599/607023/490904/489968/476413/612328/482208/484721/488527/607180	11
KEGG_Pathway_Module_1	cfa04371	Apelin signaling pathway	9/102	136/7482	9.10263e-05	0.00096432	0.000604725	482994/482045/480416/476428/485769/479021/475345/488190/476413	9
KEGG_Pathway_Module_1	cfa04970	Salivary secretion	7/102	79/7482	9.23285e-05	0.00096432	0.000604725	482994/482045/492238/480416/476428/490904/489968	7
KEGG_Pathway_Module_1	cfa04261	Adrenergic signaling in cardiomyocytes	9/102	140/7482	0.000113855	0.00107024	0.000671148	482994/482045/492238/480416/476428/607922/607023/490904/609879	9
KEGG_Pathway_Module_1	cfa04310	Wnt signaling pathway	9/102	140/7482	0.000113855	0.00107024	0.000671148	478108/609027/490904/489968/612328/482208/484721/488527/607180	9
KEGG_Pathway_Module_1	cfa04020	Calcium signaling pathway	10/102	181/7482	0.000166173	0.00148765	0.000932904	482994/482045/492238/480416/476428/475345/488190/609027/490904/489968	10
KEGG_Pathway_Module_1	cfa04540	Gap junction	7/102	88/7482	0.00018295	0.00150902	0.000946305	482994/482045/490904/489968/486762/485950/480213	7
KEGG_Pathway_Module_1	cfa05163	Human cytomegalovirus infection	11/102	221/7482	0.000195281	0.00150902	0.000946305	482994/482045/480416/476428/607922/485839/102154318/607023/609027/490904/489968	11
KEGG_Pathway_Module_1	cfa04912	GnRH signaling pathway	7/102	89/7482	0.000196374	0.00150902	0.000946305	482994/482045/480416/476428/607023/490904/489968	7
KEGG_Pathway_Module_1	cfa05217	Basal cell carcinoma	6/102	63/7482	0.000200667	0.00150902	0.000946305	481126/612328/482208/484721/488527/607180	6
KEGG_Pathway_Module_1	cfa05031	Amphetamine addiction	6/102	65/7482	0.000238644	0.00172558	0.00108211	480416/476428/607922/609027/490904/489968	6
KEGG_Pathway_Module_1	cfa01522	Endocrine resistance	7/102	93/7482	0.000258265	0.00179829	0.00112771	482994/482045/485839/403640/403639/485769/607023	7
KEGG_Pathway_Module_1	cfa04024	cAMP signaling pathway	10/102	193/7482	0.000280245	0.00188164	0.00117998	482994/482045/492238/480416/476428/607922/481126/479540/487221/476413	10
KEGG_Pathway_Module_1	cfa04750	Inflammatory mediator regulation of TRP channels	7/102	99/7482	0.000379687	0.00246142	0.00154355	482994/482045/480416/476428/607023/490904/489968	7
KEGG_Pathway_Module_1	cfa04915	Estrogen signaling pathway	8/102	133/7482	0.000435664	0.00269177	0.00168801	482994/482045/480416/476428/607922/403640/403639/475684	8
KEGG_Pathway_Module_1	cfa04015	Rap1 signaling pathway	10/102	205/7482	0.000453812	0.00269177	0.00168801	482994/482045/480416/476428/403727/607023/610829/490904/489968/476413	10
KEGG_Pathway_Module_1	cfa04550	Signaling pathways regulating pluripotency of stem cells	8/102	134/7482	0.000458173	0.00269177	0.00168801	484718/486283/607023/612328/482208/484721/488527/607180	8
KEGG_Pathway_Module_1	cfa04114	Oocyte meiosis	7/102	113/7482	0.000843331	0.00480443	0.00301286	482994/482045/480416/476428/609027/491989/477237	7
KEGG_Pathway_Module_1	cfa04911	Insulin secretion	6/102	84/7482	0.000953547	0.00519274	0.00325637	482994/482045/607922/606490/490904/489968	6
KEGG_Pathway_Module_1	cfa04150	mTOR signaling pathway	8/102	150/7482	0.000966734	0.00519274	0.00325637	490904/489968/491989/612328/482208/484721/488527/607180	8
KEGG_Pathway_Module_1	cfa04390	Hippo signaling pathway	8/102	153/7482	0.00109952	0.00574194	0.00360077	474698/610713/612328/482208/484721/488527/607180/477237	8
KEGG_Pathway_Module_1	cfa04728	Dopaminergic synapse	7/102	131/7482	0.00199667	0.0101452	0.00636208	480416/476428/607922/607023/609027/490904/489968	7
KEGG_Pathway_Module_1	cfa05166	Human T-cell leukemia virus 1 infection	9/102	209/7482	0.00210893	0.0104336	0.00654293	482994/482045/100856315/477302/486338/607922/485839/609027/611011	9
KEGG_Pathway_Module_1	cfa05214	Glioma	5/102	71/7482	0.00272597	0.0131406	0.00824046	480416/476428/485839/490904/489968	5
KEGG_Pathway_Module_1	cfa04918	Thyroid hormone synthesis	5/102	72/7482	0.00289821	0.0133384	0.00836453	482994/482045/607922/490904/489968	5
KEGG_Pathway_Module_1	cfa04961	Endocrine and other factor-regulated calcium reabsorption	4/102	44/7482	0.00290891	0.0133384	0.00836453	480578/403640/490904/489968	4
KEGG_Pathway_Module_1	cfa05226	Gastric cancer	7/102	150/7482	0.00426585	0.0190947	0.0119743	474698/485839/612328/482208/484721/488527/607180	7
KEGG_Pathway_Module_1	cfa04725	Cholinergic synapse	6/102	114/7482	0.00450874	0.0197126	0.0123618	482994/482045/607922/475032/490904/489968	6
KEGG_Pathway_Module_1	cfa04611	Platelet activation	6/102	120/7482	0.00578504	0.0243769	0.0152867	482994/482045/475032/607023/475345/488190	6
KEGG_Pathway_Module_1	cfa04010	MAPK signaling pathway	10/102	289/7482	0.00583489	0.0243769	0.0152867	484742/403727/102154318/487345/607023/609027/490904/489968/491989/476413	10
KEGG_Pathway_Module_1	cfa05165	Human papillomavirus infection	11/102	337/7482	0.00596759	0.0243893	0.0152945	100856315/477302/607922/485839/485769/611011/612328/482208/484721/488527/607180	11
KEGG_Pathway_Module_1	cfa04972	Pancreatic secretion	5/102	88/7482	0.00684	0.02736	0.0171574	482994/482045/492238/490904/489968	5
KEGG_Pathway_Module_1	cfa04914	Progesterone-mediated oocyte maturation	5/102	89/7482	0.00717032	0.0280838	0.0176113	482994/482045/477302/607023/491989	5
KEGG_Pathway_Module_1	cfa04370	VEGF signaling pathway	4/102	57/7482	0.00739741	0.0283819	0.0177983	607023/609027/490904/489968	4
KEGG_Pathway_Module_1	cfa00230	Purine metabolism	7/102	171/7482	0.00862092	0.0324147	0.0203272	482994/482045/488422/479540/487221/486975/483996	7
KEGG_Pathway_Module_1	cfa04922	Glucagon signaling pathway	5/102	96/7482	0.00980081	0.0361285	0.0226561	480416/476428/607922/606490/609027	5
KEGG_Pathway_Module_1	cfa04137	Mitophagy - animal	4/102	64/7482	0.0110693	0.039403	0.0247096	478108/485839/476413/474451	4
KEGG_Pathway_Module_1	cfa04625	C-type lectin receptor signaling pathway	5/102	99/7482	0.0111083	0.039403	0.0247096	480416/476428/607023/609027/476413	5
KEGG_Pathway_Module_1	cfa04714	Thermogenesis	8/102	225/7482	0.0114623	0.0399047	0.0250242	608417/482994/482045/607922/607023/491989/476335/476640	8
KEGG_Pathway_Module_1	cfa04924	Renin secretion	4/102	65/7482	0.0116742	0.0399047	0.0250242	480416/476428/607922/609027	4
KEGG_Pathway_Module_1	cfa04072	Phospholipase D signaling pathway	6/102	145/7482	0.014037	0.0462975	0.0290331	482994/482045/475032/102154318/490904/476413	6
KEGG_Pathway_Module_1	cfa05161	Hepatitis B	6/102	145/7482	0.014037	0.0462975	0.0290331	477302/607922/485839/490904/489968/477237	6
KEGG_Pathway_Module_1	cfa04917	Prolactin signaling pathway	4/102	70/7482	0.015017	0.0486759	0.0305246	403640/403639/606490/607023	4
KEGG_Pathway_Module_1	cfa04510	Focal adhesion	7/102	198/7482	0.0181966	0.057919	0.036321	403727/475032/608177/475345/488190/490904/489968	7
KEGG_Pathway_Module_1	cfa04670	Leukocyte transendothelial migration	5/102	113/7482	0.0187929	0.057919	0.036321	474698/607023/608177/490904/489968	5
KEGG_Pathway_Module_1	cfa04724	Glutamatergic synapse	5/102	113/7482	0.0187929	0.057919	0.036321	482994/482045/609027/490904/489968	5
KEGG_Pathway_Module_1	cfa05170	Human immunodeficiency virus 1 infection	7/102	201/7482	0.019595	0.0594171	0.0372605	100856315/480416/476428/607023/609027/490904/489968	7
KEGG_Pathway_Module_1	cfa05132	Salmonella infection	4/102	79/7482	0.0224372	0.0669556	0.0419878	483715/484448/607023/610829	4
KEGG_Pathway_Module_1	cfa04071	Sphingolipid signaling pathway	5/102	121/7482	0.0244581	0.0718456	0.0450544	475032/102154318/607023/490904/489968	5
KEGG_Pathway_Module_1	cfa04810	Regulation of actin cytoskeleton	7/102	212/7482	0.0253682	0.0733726	0.0460119	102154318/608177/475345/488190/610829/476413/477526	7
KEGG_Pathway_Module_1	cfa04110	Cell cycle	5/102	123/7482	0.0260289	0.0739125	0.0463505	100856315/477302/486338/485839/477237	5
KEGG_Pathway_Module_1	cfa05414	Dilated cardiomyopathy (DCM)	4/102	83/7482	0.0263412	0.0739125	0.0463505	482994/482045/609879/478820	4
KEGG_Pathway_Module_1	cfa04926	Relaxin signaling pathway	5/102	129/7482	0.0311247	0.0853046	0.0534945	482994/482045/607922/607023/490904	5
KEGG_Pathway_Module_1	cfa04211	Longevity regulating pathway	4/102	88/7482	0.0317624	0.0853046	0.0534945	482994/482045/607922/491224	4
KEGG_Pathway_Module_1	cfa04727	GABAergic synapse	4/102	88/7482	0.0317624	0.0853046	0.0534945	482994/482045/490904/489968	4
KEGG_Pathway_Module_1	cfa04014	Ras signaling pathway	7/102	227/7482	0.0349906	0.0917494	0.057536	480052/480416/476428/403727/490904/489968/476413	7
KEGG_Pathway_Module_1	cfa05167	Kaposi sarcoma-associated herpesvirus infection	6/102	179/7482	0.0351381	0.0917494	0.057536	480416/476428/607922/485839/607023/609027	6
KEGG_Pathway_Module_1	cfa00310	Lysine degradation	3/102	56/7482	0.0405264	0.104369	0.06545	480128/491224/610615	3
KEGG_Pathway_Module_1	cfa04070	Phosphatidylinositol signaling system	4/102	97/7482	0.0430628	0.109403	0.0686064	480416/476428/490904/489968	4
KEGG_Pathway_Module_1	cfa04066	HIF-1 signaling pathway	4/102	99/7482	0.0458451	0.114918	0.0720653	403727/403755/490904/489968	4
KEGG_Pathway_Module_1	cfa04730	Long-term depression	3/102	60/7482	0.0481363	0.119074	0.0746712	102154318/490904/489968	3
KEGG_Pathway_Module_1	cfa04650	Natural killer cell mediated cytotoxicity	4/102	102/7482	0.0502034	0.122575	0.0768665	475032/609027/490904/489968	4
KEGG_Pathway_Module_1	cfa04927	Cortisol synthesis and secretion	3/102	62/7482	0.0521861	0.125782	0.0788778	482994/482045/607922	3
KEGG_Pathway_Module_1	cfa04723	Retrograde endocannabinoid signaling	5/102	150/7482	0.0536747	0.127732	0.0801008	482994/482045/607023/490904/489968	5
KEGG_Pathway_Module_1	cfa04392	Hippo signaling pathway - multiple species	2/102	28/7482	0.0552932	0.128335	0.0804787	482659/610713	2
KEGG_Pathway_Module_1	cfa04744	Phototransduction	2/102	28/7482	0.0552932	0.128335	0.0804787	480416/476428	2
KEGG_Pathway_Module_1	cfa04664	Fc epsilon RI signaling pathway	3/102	66/7482	0.0607627	0.13931	0.087361	475032/607023/490904	3
KEGG_Pathway_Module_1	cfa05223	Non-small cell lung cancer	3/102	67/7482	0.063004	0.142708	0.0894921	485839/490904/489968	3
KEGG_Pathway_Module_1	cfa04919	Thyroid hormone signaling pathway	4/102	111/7482	0.0645982	0.144577	0.0906642	403640/475684/490904/489968	4
KEGG_Pathway_Module_1	cfa00524	Neomycin, kanamycin and gentamicin biosynthesis	1/102	5/7482	0.0663475	0.14608	0.0916065	606490	1
KEGG_Pathway_Module_1	cfa04115	p53 signaling pathway	3/102	69/7482	0.0676007	0.14608	0.0916065	100856315/479303/486338	3
KEGG_Pathway_Module_1	cfa04520	Adherens junction	3/102	69/7482	0.0676007	0.14608	0.0916065	478108/474698/475032	3
KEGG_Pathway_Module_1	cfa05133	Pertussis	3/102	71/7482	0.0723466	0.154559	0.0969236	480416/476428/607023	3
KEGG_Pathway_Module_1	cfa04722	Neurotrophin signaling pathway	4/102	118/7482	0.0771366	0.16294	0.10218	480416/476428/607023/491989	4
KEGG_Pathway_Module_1	cfa05143	African trypanosomiasis	2/102	35/7482	0.0819067	0.169707	0.106423	490904/489968	2
KEGG_Pathway_Module_1	cfa05152	Tuberculosis	5/102	170/7482	0.0821456	0.169707	0.106423	480416/476428/607922/607023/609027	5
KEGG_Pathway_Module_1	cfa05100	Bacterial invasion of epithelial cells	3/102	76/7482	0.0848411	0.173371	0.108721	611857/480578/474698	3
KEGG_Pathway_Module_1	cfa04960	Aldosterone-regulated sodium reabsorption	2/102	37/7482	0.0901113	0.181616	0.113891	490904/489968	2
KEGG_Pathway_Module_1	cfa04380	Osteoclast differentiation	4/102	125/7482	0.0908081	0.181616	0.113891	607922/475032/607023/609027	4
KEGG_Pathway_Module_1	cfa04012	ErbB signaling pathway	3/102	85/7482	0.109442	0.215245	0.13498	480052/490904/489968	3
KEGG_Pathway_Module_1	cfa04910	Insulin signaling pathway	4/102	134/7482	0.109968	0.215245	0.13498	480416/476428/606490/480459	4
KEGG_Pathway_Module_1	cfa03022	Basal transcription factors	2/102	42/7482	0.111594	0.215245	0.13498	488002/611011	2
KEGG_Pathway_Module_1	cfa05418	Fluid shear stress and atherosclerosis	4/102	135/7482	0.112202	0.215245	0.13498	480416/476428/607023/479021	4
KEGG_Pathway_Module_1	cfa04658	Th1 and Th2 cell differentiation	3/102	87/7482	0.115249	0.215993	0.135449	485769/607023/609027	3
KEGG_Pathway_Module_1	cfa05203	Viral carcinogenesis	5/102	189/7482	0.115339	0.215993	0.135449	477302/607922/488002/611011/477237	5
KEGG_Pathway_Module_1	cfa04962	Vasopressin-regulated water reabsorption	2/102	43/7482	0.116039	0.215993	0.135449	482994/607922	2
KEGG_Pathway_Module_1	cfa04340	Hedgehog signaling pathway	2/102	44/7482	0.120529	0.219994	0.137958	481126/476134	2
KEGG_Pathway_Module_1	cfa04913	Ovarian steroidogenesis	2/102	44/7482	0.120529	0.219994	0.137958	482994/482045	2
KEGG_Pathway_Module_1	cfa05416	Viral myocarditis	2/102	48/7482	0.138895	0.25108	0.157452	480052/475032	2
KEGG_Pathway_Module_1	cfa05014	Amyotrophic lateral sclerosis (ALS)	2/102	49/7482	0.143579	0.257075	0.161212	607023/609027	2
KEGG_Pathway_Module_1	cfa04660	T cell receptor signaling pathway	3/102	99/7482	0.152351	0.267682	0.167863	475032/607023/609027	3
KEGG_Pathway_Module_1	cfa04933	AGE-RAGE signaling pathway in diabetic complications	3/102	99/7482	0.152351	0.267682	0.167863	607023/490904/489968	3
KEGG_Pathway_Module_1	cfa04923	Regulation of lipolysis in adipocytes	2/102	53/7482	0.16263	0.283096	0.17753	482994/482045	2
KEGG_Pathway_Module_1	cfa04668	TNF signaling pathway	3/102	105/7482	0.172167	0.296949	0.186216	607922/485769/607023	3
KEGG_Pathway_Module_1	cfa04931	Insulin resistance	3/102	108/7482	0.182342	0.311639	0.195429	607922/489968/491989	3
KEGG_Pathway_Module_1	cfa04213	Longevity regulating pathway - multiple species	2/102	59/7482	0.191971	0.324322	0.203382	482994/482045	2
KEGG_Pathway_Module_1	cfa05034	Alcoholism	4/102	167/7482	0.193213	0.324322	0.203382	480416/476428/611124/607922	4
KEGG_Pathway_Module_1	cfa05010	Alzheimer disease	4/102	168/7482	0.195999	0.326087	0.204489	480416/476428/403755/609027	4
KEGG_Pathway_Module_1	cfa00010	Glycolysis / Gluconeogenesis	2/102	62/7482	0.206897	0.341199	0.213966	403755/606490	2
KEGG_Pathway_Module_1	cfa04976	Bile secretion	2/102	65/7482	0.221945	0.362832	0.227532	482994/482045	2
KEGG_Pathway_Module_1	cfa05140	Leishmaniasis	2/102	66/7482	0.226982	0.366518	0.229843	607023/489968	2
KEGG_Pathway_Module_1	cfa04152	AMPK signaling pathway	3/102	121/7482	0.228099	0.366518	0.229843	477302/607922/474818	3
KEGG_Pathway_Module_1	cfa04662	B cell receptor signaling pathway	2/102	68/7482	0.23708	0.377721	0.236869	609027/489968	2
KEGG_Pathway_Module_1	cfa05412	Arrhythmogenic right ventricular cardiomyopathy (ARVC)	2/102	69/7482	0.242139	0.382539	0.23989	479191/474698	2
KEGG_Pathway_Module_1	cfa05206	MicroRNAs in cancer	5/102	260/7482	0.280765	0.436654	0.273826	479303/485839/490904/489968/482208	5
KEGG_Pathway_Module_1	cfa04950	Maturity onset diabetes of the young	1/102	24/7482	0.281038	0.436654	0.273826	606490	1
KEGG_Pathway_Module_1	cfa04145	Phagosome	3/102	137/7482	0.286938	0.438571	0.275028	486762/485950/480213	3
KEGG_Pathway_Module_1	cfa04514	Cell adhesion molecules (CAMs)	3/102	137/7482	0.286938	0.438571	0.275028	607997/484361/483417	3
KEGG_Pathway_Module_1	cfa05410	Hypertrophic cardiomyopathy (HCM)	2/102	79/7482	0.292846	0.443992	0.278427	609879/478820	2
KEGG_Pathway_Module_1	cfa01521	EGFR tyrosine kinase inhibitor resistance	2/102	80/7482	0.297907	0.448052	0.280974	490904/489968	2
KEGG_Pathway_Module_1	cfa04666	Fc gamma R-mediated phagocytosis	2/102	85/7482	0.323121	0.482116	0.302335	490904/489968	2
KEGG_Pathway_Module_1	cfa04657	IL-17 signaling pathway	2/102	86/7482	0.328139	0.48575	0.304613	607023/491690	2
KEGG_Pathway_Module_1	cfa00052	Galactose metabolism	1/102	30/7482	0.338073	0.489013	0.30666	606490	1
KEGG_Pathway_Module_1	cfa04710	Circadian rhythm	1/102	30/7482	0.338073	0.489013	0.30666	607922	1
KEGG_Pathway_Module_1	cfa04064	NF-kappa B signaling pathway	2/102	88/7482	0.338148	0.489013	0.30666	478108/489968	2
KEGG_Pathway_Module_1	cfa05146	Amoebiasis	2/102	93/7482	0.362966	0.512321	0.321276	490904/489968	2
KEGG_Pathway_Module_1	cfa00500	Starch and sucrose metabolism	1/102	33/7482	0.364887	0.512321	0.321276	606490	1
KEGG_Pathway_Module_1	cfa05020	Prion diseases	1/102	33/7482	0.364887	0.512321	0.321276	475032	1
KEGG_Pathway_Module_1	cfa00564	Glycerophospholipid metabolism	2/102	94/7482	0.36789	0.512321	0.321276	475670/480663	2
KEGG_Pathway_Module_1	cfa05215	Prostate cancer	2/102	94/7482	0.36789	0.512321	0.321276	607922/485839	2
KEGG_Pathway_Module_1	cfa05231	Choline metabolism in cancer	2/102	97/7482	0.382575	0.528853	0.331644	490904/489968	2
KEGG_Pathway_Module_1	cfa04940	Type I diabetes mellitus	1/102	36/7482	0.390625	0.53604	0.336151	478921	1
KEGG_Pathway_Module_1	cfa04659	Th17 cell differentiation	2/102	102/7482	0.406724	0.554088	0.347468	607023/609027	2
KEGG_Pathway_Module_1	cfa04530	Tight junction	3/102	171/7482	0.413787	0.557728	0.349751	477206/481054/486762	3
KEGG_Pathway_Module_1	cfa04973	Carbohydrate digestion and absorption	1/102	39/7482	0.41533	0.557728	0.349751	489968	1
KEGG_Pathway_Module_1	cfa05219	Bladder cancer	1/102	41/7482	0.431246	0.572001	0.358702	485839	1
KEGG_Pathway_Module_1	cfa04062	Chemokine signaling pathway	3/102	176/7482	0.432043	0.572001	0.358702	482994/482045/489968	3
KEGG_Pathway_Module_1	cfa04726	Serotonergic synapse	2/102	111/7482	0.44902	0.59032	0.370189	490904/489968	2
KEGG_Pathway_Module_1	cfa01200	Carbon metabolism	2/102	115/7482	0.46728	0.604154	0.378865	403755/606490	2
KEGG_Pathway_Module_1	cfa05016	Huntington disease	3/102	186/7482	0.467927	0.604154	0.378865	480578/607922/611011	3
KEGG_Pathway_Module_1	cfa04930	Type II diabetes mellitus	1/102	46/7482	0.469183	0.604154	0.378865	606490	1
KEGG_Pathway_Module_1	cfa04330	Notch signaling pathway	1/102	47/7482	0.476465	0.606171	0.38013	485769	1
KEGG_Pathway_Module_1	cfa00520	Amino sugar and nucleotide sugar metabolism	1/102	48/7482	0.483647	0.606171	0.38013	606490	1
KEGG_Pathway_Module_1	cfa04979	Cholesterol metabolism	1/102	48/7482	0.483647	0.606171	0.38013	480208	1
KEGG_Pathway_Module_1	cfa05030	Cocaine addiction	1/102	48/7482	0.483647	0.606171	0.38013	607922	1
KEGG_Pathway_Module_1	cfa03460	Fanconi anemia pathway	1/102	49/7482	0.490732	0.609093	0.381962	100856315	1
KEGG_Pathway_Module_1	cfa05169	Epstein-Barr virus infection	3/102	193/7482	0.492458	0.609093	0.381962	477302/485839/607023	3
KEGG_Pathway_Module_1	cfa05162	Measles	2/102	128/7482	0.524092	0.640588	0.401713	478108/475032	2
KEGG_Pathway_Module_1	cfa04612	Antigen processing and presentation	1/102	54/7482	0.524737	0.640588	0.401713	607922	1
KEGG_Pathway_Module_1	cfa00561	Glycerolipid metabolism	1/102	59/7482	0.556493	0.670645	0.420561	475670	1
KEGG_Pathway_Module_1	cfa05213	Endometrial cancer	1/102	59/7482	0.556493	0.670645	0.420561	474698	1
KEGG_Pathway_Module_1	cfa05230	Central carbon metabolism in cancer	1/102	60/7482	0.562587	0.673671	0.422459	606490	1
KEGG_Pathway_Module_1	cfa04721	Synaptic vesicle cycle	1/102	63/7482	0.580376	0.690575	0.433059	480578	1
KEGG_Pathway_Module_1	cfa05221	Acute myeloid leukemia	1/102	65/7482	0.591836	0.699781	0.438833	442959	1
KEGG_Pathway_Module_1	cfa04622	RIG-I-like receptor signaling pathway	1/102	68/7482	0.608447	0.714926	0.44833	607023	1
KEGG_Pathway_Module_1	cfa04260	Cardiac muscle contraction	1/102	71/7482	0.624389	0.7291	0.457218	609879	1
KEGG_Pathway_Module_1	cfa05212	Pancreatic cancer	1/102	73/7482	0.634658	0.7333	0.459852	485839	1
KEGG_Pathway_Module_1	cfa01230	Biosynthesis of amino acids	1/102	74/7482	0.639687	0.7333	0.459852	403755	1
KEGG_Pathway_Module_1	cfa05218	Melanoma	1/102	74/7482	0.639687	0.7333	0.459852	485839	1
KEGG_Pathway_Module_1	cfa05220	Chronic myeloid leukemia	1/102	75/7482	0.644649	0.734509	0.46061	485839	1
KEGG_Pathway_Module_1	cfa05164	Influenza A	2/102	161/7482	0.64934	0.735397	0.461167	607023/490904	2
KEGG_Pathway_Module_1	cfa04742	Taste transduction	1/102	77/7482	0.654369	0.736655	0.461956	482045	1
KEGG_Pathway_Module_1	cfa03008	Ribosome biogenesis in eukaryotes	1/102	79/7482	0.663826	0.742852	0.465842	478108	1
KEGG_Pathway_Module_1	cfa05202	Transcriptional misregulation in cancer	2/102	168/7482	0.672332	0.744288	0.466743	403727/612328	2
KEGG_Pathway_Module_1	cfa05323	Rheumatoid arthritis	1/102	81/7482	0.673026	0.744288	0.466743	403727	1
KEGG_Pathway_Module_1	cfa04146	Peroxisome	1/102	82/7482	0.677532	0.744889	0.46712	475227	1
KEGG_Pathway_Module_1	cfa05168	Herpes simplex infection	2/102	178/7482	0.703068	0.76847	0.481907	478108/611011	2
KEGG_Pathway_Module_1	cfa05222	Small cell lung cancer	1/102	92/7482	0.719346	0.778234	0.48803	485839	1
KEGG_Pathway_Module_1	cfa04151	PI3K-Akt signaling pathway	4/102	355/7482	0.72028	0.778234	0.48803	607922/403727/490904/477237	4
KEGG_Pathway_Module_1	cfa04620	Toll-like receptor signaling pathway	1/102	101/7482	0.752363	0.808252	0.506855	607023	1
KEGG_Pathway_Module_1	cfa05142	Chagas disease (American trypanosomiasis)	1/102	103/7482	0.75916	0.810921	0.508528	607023	1
KEGG_Pathway_Module_1	cfa05145	Toxoplasmosis	1/102	109/7482	0.778464	0.826843	0.518513	607023	1
KEGG_Pathway_Module_1	cfa04142	Lysosome	1/102	118/7482	0.804582	0.849783	0.532899	480578	1
KEGG_Pathway_Module_1	cfa04068	FoxO signaling pathway	1/102	128/7482	0.830038	0.852885	0.534844	607023	1
KEGG_Pathway_Module_1	cfa04140	Autophagy - animal	1/102	128/7482	0.830038	0.852885	0.534844	476413	1
KEGG_Pathway_Module_1	cfa00190	Oxidative phosphorylation	1/102	131/7482	0.837013	0.852885	0.534844	403820	1
KEGG_Pathway_Module_1	cfa04210	Apoptosis	1/102	131/7482	0.837013	0.852885	0.534844	486762	1
KEGG_Pathway_Module_1	cfa04144	Endocytosis	2/102	236/7482	0.837526	0.852885	0.534844	477680/480578	2
KEGG_Pathway_Module_1	cfa03040	Spliceosome	1/102	132/7482	0.839275	0.852885	0.534844	606899	1
KEGG_Pathway_Module_1	cfa05160	Hepatitis C	1/102	132/7482	0.839275	0.852885	0.534844	607023	1
KEGG_Pathway_Module_1	cfa05012	Parkinson disease	1/102	138/7482	0.852206	0.86137	0.540165	481479	1
KEGG_Pathway_Module_1	cfa04621	NOD-like receptor signaling pathway	1/102	154/7482	0.881867	0.886583	0.555976	607023	1
KEGG_Pathway_Module_1	cfa04141	Protein processing in endoplasmic reticulum	1/102	159/7482	0.889865	0.889865	0.558034	476089	1
KEGG_Pathway_Module_2	cfa01200	Carbon metabolism	12/40	115/7482	3.77833e-13	2.30478e-11	1.51133e-11	490207/488506/480828/479597/403755/100856745/478889/474614/478019/489536/475775/476562	12
KEGG_Pathway_Module_2	cfa00640	Propanoate metabolism	6/40	32/7482	1.29224e-08	3.94133e-07	2.58448e-07	490207/480828/100856745/476883/475775/476562	6
KEGG_Pathway_Module_2	cfa01230	Biosynthesis of amino acids	7/40	74/7482	9.96318e-08	2.02585e-06	1.32842e-06	488506/479597/403755/478889/478019/489536/479665	7
KEGG_Pathway_Module_2	cfa00410	beta-Alanine metabolism	5/40	30/7482	4.35814e-07	6.64616e-06	4.35814e-06	490207/476166/100856067/480828/100856745	5
KEGG_Pathway_Module_2	cfa00650	Butanoate metabolism	4/40	25/7482	8.17153e-06	9.96927e-05	6.53723e-05	608888/488246/480828/100856745	4
KEGG_Pathway_Module_2	cfa00020	Citrate cycle (TCA cycle)	4/40	29/7482	1.51077e-05	0.000153595	0.000100718	478889/474614/475775/476562	4
KEGG_Pathway_Module_2	cfa00970	Aminoacyl-tRNA biosynthesis	5/40	66/7482	2.37437e-05	0.00020691	0.000135679	474920/490337/478035/484216/479019	5
KEGG_Pathway_Module_2	cfa00010	Glycolysis / Gluconeogenesis	4/40	62/7482	0.000312501	0.00238282	0.00156251	479597/403755/476883/478019	4
KEGG_Pathway_Module_2	cfa00250	Alanine, aspartate and glutamate metabolism	3/40	36/7482	0.000894491	0.00606266	0.00397551	488246/488506/611407	3
KEGG_Pathway_Module_2	cfa00071	Fatty acid degradation	3/40	41/7482	0.00131101	0.00799713	0.00524402	490207/480828/100856745	3
KEGG_Pathway_Module_2	cfa00270	Cysteine and methionine metabolism	3/40	46/7482	0.00183271	0.0101632	0.00666442	476883/474614/479665	3
KEGG_Pathway_Module_2	cfa00280	Valine, leucine and isoleucine degradation	3/40	48/7482	0.00207282	0.0103224	0.00676881	490207/480828/100856745	3
KEGG_Pathway_Module_2	cfa01212	Fatty acid metabolism	3/40	49/7482	0.00219986	0.0103224	0.00676881	490207/480828/100856745	3
KEGG_Pathway_Module_2	cfa03018	RNA degradation	3/40	79/7482	0.00845443	0.0368372	0.0241555	489086/479597/478019	3
KEGG_Pathway_Module_2	cfa00062	Fatty acid elongation	2/40	28/7482	0.00964915	0.0392399	0.0257311	480828/100856745	2
KEGG_Pathway_Module_2	cfa00630	Glyoxylate and dicarboxylate metabolism	2/40	29/7482	0.0103291	0.0393797	0.0258228	474614/489536	2
KEGG_Pathway_Module_2	cfa00051	Fructose and mannose metabolism	2/40	32/7482	0.0124922	0.044825	0.0293934	478019/490013	2
KEGG_Pathway_Module_2	cfa00620	Pyruvate metabolism	2/40	37/7482	0.0164947	0.0558985	0.0366548	476883/474614	2
KEGG_Pathway_Module_2	cfa00380	Tryptophan metabolism	2/40	39/7482	0.0182295	0.0585264	0.0383779	480828/100856745	2
KEGG_Pathway_Module_2	cfa00520	Amino sugar and nucleotide sugar metabolism	2/40	48/7482	0.026927	0.0821273	0.053854	478043/490013	2
KEGG_Pathway_Module_2	cfa00480	Glutathione metabolism	2/40	52/7482	0.0312337	0.0877894	0.0575668	485847/478889	2
KEGG_Pathway_Module_2	cfa00400	Phenylalanine, tyrosine and tryptophan biosynthesis	1/40	6/7482	0.0316617	0.0877894	0.0575668	479665	1
KEGG_Pathway_Module_2	cfa00310	Lysine degradation	2/40	56/7482	0.0357939	0.0949316	0.0622502	480828/100856745	2
KEGG_Pathway_Module_2	cfa04141	Protein processing in endoplasmic reticulum	3/40	159/7482	0.0524899	0.133412	0.0874832	476966/610015/476089	3
KEGG_Pathway_Module_2	cfa00130	Ubiquinone and other terpenoid-quinone biosynthesis	1/40	11/7482	0.0572981	0.139807	0.0916769	479665	1
KEGG_Pathway_Module_2	cfa00430	Taurine and hypotaurine metabolism	1/40	13/7482	0.0673662	0.158052	0.10364	485847	1
KEGG_Pathway_Module_2	cfa00730	Thiamine metabolism	1/40	14/7482	0.0723609	0.163482	0.107201	490204	1
KEGG_Pathway_Module_2	cfa00360	Phenylalanine metabolism	1/40	17/7482	0.087189	0.171565	0.112502	479665	1
KEGG_Pathway_Module_2	cfa00770	Pantothenate and CoA biosynthesis	1/40	17/7482	0.087189	0.171565	0.112502	100856067	1
KEGG_Pathway_Module_2	cfa00910	Nitrogen metabolism	1/40	17/7482	0.087189	0.171565	0.112502	488506	1
KEGG_Pathway_Module_2	cfa01210	2-Oxocarboxylic acid metabolism	1/40	17/7482	0.087189	0.171565	0.112502	478889	1
KEGG_Pathway_Module_2	cfa00220	Arginine biosynthesis	1/40	19/7482	0.0969458	0.180629	0.118445	488506	1
KEGG_Pathway_Module_2	cfa04066	HIF-1 signaling pathway	2/40	99/7482	0.0978125	0.180629	0.118445	479597/403755	2
KEGG_Pathway_Module_2	cfa00670	One carbon pool by folate	1/40	20/7482	0.101786	0.180629	0.118445	489536	1
KEGG_Pathway_Module_2	cfa00340	Histidine metabolism	1/40	21/7482	0.106601	0.180629	0.118445	476166	1
KEGG_Pathway_Module_2	cfa04964	Proximal tubule bicarbonate reclamation	1/40	21/7482	0.106601	0.180629	0.118445	474614	1
KEGG_Pathway_Module_2	cfa00030	Pentose phosphate pathway	1/40	29/7482	0.144224	0.235943	0.154717	478019	1
KEGG_Pathway_Module_2	cfa00052	Galactose metabolism	1/40	30/7482	0.148817	0.235943	0.154717	478019	1
KEGG_Pathway_Module_2	cfa01523	Antifolate resistance	1/40	31/7482	0.153386	0.235943	0.154717	489536	1
KEGG_Pathway_Module_2	cfa00350	Tyrosine metabolism	1/40	32/7482	0.157931	0.235943	0.154717	479665	1
KEGG_Pathway_Module_2	cfa00500	Starch and sucrose metabolism	1/40	33/7482	0.162452	0.235943	0.154717	485198	1
KEGG_Pathway_Module_2	cfa00860	Porphyrin and chlorophyll metabolism	1/40	33/7482	0.162452	0.235943	0.154717	474808	1
KEGG_Pathway_Module_2	cfa00260	Glycine, serine and threonine metabolism	1/40	40/7482	0.193444	0.274421	0.179948	489536	1
KEGG_Pathway_Module_2	cfa00330	Arginine and proline metabolism	1/40	47/7482	0.223317	0.301396	0.197637	476166	1
KEGG_Pathway_Module_2	cfa00830	Retinol metabolism	1/40	49/7482	0.231653	0.301396	0.197637	478319	1
KEGG_Pathway_Module_2	cfa03460	Fanconi anemia pathway	1/40	49/7482	0.231653	0.301396	0.197637	481337	1
KEGG_Pathway_Module_2	cfa00230	Purine metabolism	2/40	171/7482	0.232223	0.301396	0.197637	490204/611407	2
KEGG_Pathway_Module_2	cfa05230	Central carbon metabolism in cancer	1/40	60/7482	0.27596	0.350699	0.229967	478019	1
KEGG_Pathway_Module_2	cfa00983	Drug metabolism - other enzymes	1/40	63/7482	0.287605	0.358039	0.23478	100856067	1
KEGG_Pathway_Module_2	cfa03320	PPAR signaling pathway	1/40	76/7482	0.335991	0.409909	0.268793	490207	1
KEGG_Pathway_Module_2	cfa04146	Peroxisome	1/40	82/7482	0.357228	0.427272	0.280179	478889	1
KEGG_Pathway_Module_2	cfa00240	Pyrimidine metabolism	1/40	93/7482	0.394455	0.462726	0.303427	100856067	1
KEGG_Pathway_Module_2	cfa04922	Glucagon signaling pathway	1/40	96/7482	0.404237	0.465254	0.305085	476883	1
KEGG_Pathway_Module_2	cfa04919	Thyroid hormone signaling pathway	1/40	111/7482	0.450884	0.509332	0.333988	491964	1
KEGG_Pathway_Module_2	cfa04152	AMPK signaling pathway	1/40	121/7482	0.479983	0.532345	0.349078	478019	1
KEGG_Pathway_Module_2	cfa04210	Apoptosis	1/40	131/7482	0.507576	0.552895	0.362554	481048	1
KEGG_Pathway_Module_2	cfa03013	RNA transport	1/40	158/7482	0.575141	0.601796	0.39462	100856065	1
KEGG_Pathway_Module_2	cfa04217	Necroptosis	1/40	160/7482	0.579769	0.601796	0.39462	481048	1
KEGG_Pathway_Module_2	cfa05164	Influenza A	1/40	161/7482	0.582065	0.601796	0.39462	476966	1
KEGG_Pathway_Module_2	cfa05010	Alzheimer disease	1/40	168/7482	0.597796	0.607759	0.398531	403755	1
KEGG_Pathway_Module_2	cfa04360	Axon guidance	1/40	173/7482	0.608677	0.608677	0.399133	486107	1
KEGG_Pathway_Module_3	cfa01200	Carbon metabolism	12/39	115/7482	2.67897e-13	1.68775e-11	1.12799e-11	490207/488506/480828/479597/403755/100856745/478889/474614/478019/489536/475775/476562	12
KEGG_Pathway_Module_3	cfa00640	Propanoate metabolism	6/39	32/7482	1.10169e-08	3.47034e-07	2.31936e-07	490207/480828/100856745/476883/475775/476562	6
KEGG_Pathway_Module_3	cfa01230	Biosynthesis of amino acids	7/39	74/7482	8.28458e-08	1.73976e-06	1.16275e-06	488506/479597/403755/478889/478019/489536/479665	7
KEGG_Pathway_Module_3	cfa00650	Butanoate metabolism	4/39	25/7482	7.37095e-06	0.000116092	7.75889e-05	608888/488246/480828/100856745	4
KEGG_Pathway_Module_3	cfa00020	Citrate cycle (TCA cycle)	4/39	29/7482	1.36334e-05	0.000164556	0.000109979	478889/474614/475775/476562	4
KEGG_Pathway_Module_3	cfa00410	beta-Alanine metabolism	4/39	30/7482	1.5672e-05	0.000164556	0.000109979	490207/476166/480828/100856745	4
KEGG_Pathway_Module_3	cfa00970	Aminoacyl-tRNA biosynthesis	5/39	66/7482	2.09176e-05	0.000188258	0.00012582	474920/490337/478035/484216/479019	5
KEGG_Pathway_Module_3	cfa00010	Glycolysis / Gluconeogenesis	4/39	62/7482	0.000282997	0.0022286	0.00148946	479597/403755/476883/478019	4
KEGG_Pathway_Module_3	cfa00250	Alanine, aspartate and glutamate metabolism	3/39	36/7482	0.000830139	0.00581098	0.00388369	488246/488506/611407	3
KEGG_Pathway_Module_3	cfa00380	Tryptophan metabolism	3/39	39/7482	0.00105114	0.0066222	0.00442587	476125/480828/100856745	3
KEGG_Pathway_Module_3	cfa00071	Fatty acid degradation	3/39	41/7482	0.00121729	0.00697177	0.00465949	490207/480828/100856745	3
KEGG_Pathway_Module_3	cfa00270	Cysteine and methionine metabolism	3/39	46/7482	0.00170255	0.0089384	0.00597387	476883/474614/479665	3
KEGG_Pathway_Module_3	cfa00280	Valine, leucine and isoleucine degradation	3/39	48/7482	0.00192598	0.00919904	0.00614806	490207/480828/100856745	3
KEGG_Pathway_Module_3	cfa01212	Fatty acid metabolism	3/39	49/7482	0.00204423	0.00919904	0.00614806	490207/480828/100856745	3
KEGG_Pathway_Module_3	cfa03018	RNA degradation	3/39	79/7482	0.00787948	0.0330938	0.0221178	489086/479597/478019	3
KEGG_Pathway_Module_3	cfa00062	Fatty acid elongation	2/39	28/7482	0.00918783	0.0361771	0.0241785	480828/100856745	2
KEGG_Pathway_Module_3	cfa00630	Glyoxylate and dicarboxylate metabolism	2/39	29/7482	0.00983614	0.0364516	0.0243619	474614/489536	2
KEGG_Pathway_Module_3	cfa00051	Fructose and mannose metabolism	2/39	32/7482	0.0118991	0.0416469	0.0278342	478019/490013	2
KEGG_Pathway_Module_3	cfa00620	Pyruvate metabolism	2/39	37/7482	0.0157184	0.0521189	0.034833	476883/474614	2
KEGG_Pathway_Module_3	cfa00520	Amino sugar and nucleotide sugar metabolism	2/39	48/7482	0.0256843	0.0809055	0.0540722	478043/490013	2
KEGG_Pathway_Module_3	cfa00400	Phenylalanine, tyrosine and tryptophan biosynthesis	1/39	6/7482	0.0308805	0.0926415	0.0619158	479665	1
KEGG_Pathway_Module_3	cfa00310	Lysine degradation	2/39	56/7482	0.0341655	0.0978375	0.0653885	480828/100856745	2
KEGG_Pathway_Module_3	cfa04141	Protein processing in endoplasmic reticulum	3/39	159/7482	0.0492958	0.135028	0.090244	476966/610015/476089	3
KEGG_Pathway_Module_3	cfa00130	Ubiquinone and other terpenoid-quinone biosynthesis	1/39	11/7482	0.0559028	0.146745	0.098075	479665	1
KEGG_Pathway_Module_3	cfa00730	Thiamine metabolism	1/39	14/7482	0.0706128	0.177944	0.118927	490204	1
KEGG_Pathway_Module_3	cfa00360	Phenylalanine metabolism	1/39	17/7482	0.0850994	0.191474	0.127969	479665	1
KEGG_Pathway_Module_3	cfa00910	Nitrogen metabolism	1/39	17/7482	0.0850994	0.191474	0.127969	488506	1
KEGG_Pathway_Module_3	cfa01210	2-Oxocarboxylic acid metabolism	1/39	17/7482	0.0850994	0.191474	0.127969	478889	1
KEGG_Pathway_Module_3	cfa04066	HIF-1 signaling pathway	2/39	99/7482	0.093701	0.198685	0.132789	479597/403755	2
KEGG_Pathway_Module_3	cfa00220	Arginine biosynthesis	1/39	19/7482	0.0946346	0.198685	0.132789	488506	1
KEGG_Pathway_Module_3	cfa00670	One carbon pool by folate	1/39	20/7482	0.0993658	0.198685	0.132789	489536	1
KEGG_Pathway_Module_3	cfa00340	Histidine metabolism	1/39	21/7482	0.104073	0.198685	0.132789	476166	1
KEGG_Pathway_Module_3	cfa04964	Proximal tubule bicarbonate reclamation	1/39	21/7482	0.104073	0.198685	0.132789	474614	1
KEGG_Pathway_Module_3	cfa00040	Pentose and glucuronate interconversions	1/39	22/7482	0.108756	0.201519	0.134683	609126	1
KEGG_Pathway_Module_3	cfa00030	Pentose phosphate pathway	1/39	29/7482	0.140877	0.253579	0.169476	478019	1
KEGG_Pathway_Module_3	cfa00052	Galactose metabolism	1/39	30/7482	0.145373	0.254402	0.170026	478019	1
KEGG_Pathway_Module_3	cfa01523	Antifolate resistance	1/39	31/7482	0.149845	0.255142	0.170521	489536	1
KEGG_Pathway_Module_3	cfa00350	Tyrosine metabolism	1/39	32/7482	0.154295	0.255805	0.170964	479665	1
KEGG_Pathway_Module_3	cfa00500	Starch and sucrose metabolism	1/39	33/7482	0.158722	0.256398	0.17136	485198	1
KEGG_Pathway_Module_3	cfa00260	Glycine, serine and threonine metabolism	1/39	40/7482	0.189087	0.297811	0.199038	489536	1
KEGG_Pathway_Module_3	cfa04962	Vasopressin-regulated water reabsorption	1/39	43/7482	0.20177	0.310037	0.20721	612628	1
KEGG_Pathway_Module_3	cfa05010	Alzheimer disease	2/39	168/7482	0.217962	0.31029	0.207378	403755/475322	2
KEGG_Pathway_Module_3	cfa00330	Arginine and proline metabolism	1/39	47/7482	0.218382	0.31029	0.207378	476166	1
KEGG_Pathway_Module_3	cfa00230	Purine metabolism	2/39	171/7482	0.223742	0.31029	0.207378	490204/611407	2
KEGG_Pathway_Module_3	cfa00830	Retinol metabolism	1/39	49/7482	0.226561	0.31029	0.207378	478319	1
KEGG_Pathway_Module_3	cfa03460	Fanconi anemia pathway	1/39	49/7482	0.226561	0.31029	0.207378	481337	1
KEGG_Pathway_Module_3	cfa00480	Glutathione metabolism	1/39	52/7482	0.238673	0.319923	0.213817	478889	1
KEGG_Pathway_Module_3	cfa05230	Central carbon metabolism in cancer	1/39	60/7482	0.270076	0.354475	0.236909	478019	1
KEGG_Pathway_Module_3	cfa04976	Bile secretion	1/39	65/7482	0.289058	0.371646	0.248385	612628	1
KEGG_Pathway_Module_3	cfa03320	PPAR signaling pathway	1/39	76/7482	0.329141	0.414718	0.277171	490207	1
KEGG_Pathway_Module_3	cfa04146	Peroxisome	1/39	82/7482	0.350067	0.432436	0.289013	478889	1
KEGG_Pathway_Module_3	cfa04922	Glucagon signaling pathway	1/39	96/7482	0.396453	0.480318	0.321014	476883	1
KEGG_Pathway_Module_3	cfa04152	AMPK signaling pathway	1/39	121/7482	0.471389	0.560331	0.37449	478019	1
KEGG_Pathway_Module_3	cfa00190	Oxidative phosphorylation	1/39	131/7482	0.498754	0.5713	0.381821	475322	1
KEGG_Pathway_Module_3	cfa04210	Apoptosis	1/39	131/7482	0.498754	0.5713	0.381821	481048	1
KEGG_Pathway_Module_3	cfa05012	Parkinson disease	1/39	138/7482	0.517083	0.581718	0.388784	475322	1
KEGG_Pathway_Module_3	cfa04932	Non-alcoholic fatty liver disease (NAFLD)	1/39	145/7482	0.534758	0.591048	0.39502	475322	1
KEGG_Pathway_Module_3	cfa04723	Retrograde endocannabinoid signaling	1/39	150/7482	0.546996	0.591606	0.395392	475322	1
KEGG_Pathway_Module_3	cfa03013	RNA transport	1/39	158/7482	0.565926	0.591606	0.395392	100856065	1
KEGG_Pathway_Module_3	cfa04217	Necroptosis	1/39	160/7482	0.570537	0.591606	0.395392	481048	1
KEGG_Pathway_Module_3	cfa05164	Influenza A	1/39	161/7482	0.572825	0.591606	0.395392	476966	1
KEGG_Pathway_Module_3	cfa05016	Huntington disease	1/39	186/7482	0.626305	0.636407	0.425334	475322	1
KEGG_Pathway_Module_3	cfa04714	Thermogenesis	1/39	225/7482	0.696961	0.696961	0.465805	475322	1
KEGG_Pathway_Module_4	cfa04979	Cholesterol metabolism	43145	48/7482	0.00349174	0.0838018	0.0771859	612219/478781	2
KEGG_Pathway_Module_4	cfa05146	Amoebiasis	43145	93/7482	0.0126215	0.151458	0.139501	483951/488192	2
KEGG_Pathway_Module_4	cfa04950	Maturity onset diabetes of the young	43114	24/7482	0.0440208	0.25722	0.236913	487005	1
KEGG_Pathway_Module_4	cfa05020	Prion diseases	43114	33/7482	0.0600595	0.25722	0.236913	478194	1
KEGG_Pathway_Module_4	cfa04340	Hedgehog signaling pathway	43114	44/7482	0.079323	0.25722	0.236913	478781	1
KEGG_Pathway_Module_4	cfa05150	Staphylococcus aureus infection	43114	44/7482	0.079323	0.25722	0.236913	478194	1
KEGG_Pathway_Module_4	cfa05223	Non-small cell lung cancer	43114	67/7482	0.118422	0.25722	0.236913	483021	1
KEGG_Pathway_Module_4	cfa05133	Pertussis	43114	71/7482	0.125063	0.25722	0.236913	478194	1
KEGG_Pathway_Module_4	cfa04918	Thyroid hormone synthesis	43114	72/7482	0.126716	0.25722	0.236913	478781	1
KEGG_Pathway_Module_4	cfa04610	Complement and coagulation cascades	43114	79/7482	0.138205	0.25722	0.236913	478194	1
KEGG_Pathway_Module_4	cfa04974	Protein digestion and absorption	43114	83/7482	0.144706	0.25722	0.236913	475192	1
KEGG_Pathway_Module_4	cfa04666	Fc gamma R-mediated phagocytosis	43114	85/7482	0.14794	0.25722	0.236913	474819	1
KEGG_Pathway_Module_4	cfa04657	IL-17 signaling pathway	43114	86/7482	0.149553	0.25722	0.236913	483654	1
KEGG_Pathway_Module_4	cfa04972	Pancreatic secretion	43114	88/7482	0.15277	0.25722	0.236913	475192	1
KEGG_Pathway_Module_4	cfa01522	Endocrine resistance	43114	93/7482	0.160762	0.25722	0.236913	484947	1
KEGG_Pathway_Module_4	cfa05142	Chagas disease (American trypanosomiasis)	43114	103/7482	0.176538	0.264807	0.243901	478194	1
KEGG_Pathway_Module_4	cfa05322	Systemic lupus erythematosus	43114	112/7482	0.1905	0.266248	0.245229	478194	1
KEGG_Pathway_Module_4	cfa04142	Lysosome	43114	118/7482	0.199686	0.266248	0.245229	482665	1
KEGG_Pathway_Module_4	cfa04210	Apoptosis	43114	131/7482	0.219258	0.273768	0.252154	482665	1
KEGG_Pathway_Module_4	cfa04514	Cell adhesion molecules (CAMs)	43114	137/7482	0.22814	0.273768	0.252154	487323	1
KEGG_Pathway_Module_4	cfa05164	Influenza A	43114	161/7482	0.262739	0.300273	0.276567	489387	1
KEGG_Pathway_Module_4	cfa05203	Viral carcinogenesis	43114	189/7482	0.301282	0.328671	0.302723	474819	1
KEGG_Pathway_Module_4	cfa04810	Regulation of actin cytoskeleton	43114	212/7482	0.331533	0.345948	0.318636	474819	1
KEGG_Pathway_Module_4	cfa04144	Endocytosis	43114	236/7482	0.3618	0.3618	0.333237	612219	1
KEGG_Pathway_Module_5	cfa04550	Signaling pathways regulating pluripotency of stem cells	43430	134/7482	2.47138e-13	8.15556e-12	4.68262e-12	485590/482313/482582/489028/475456/486560/612328/482208/484721/488527/607180	11
KEGG_Pathway_Module_5	cfa05217	Basal cell carcinoma	43307	63/7482	1.23675e-09	2.04064e-08	1.17166e-08	482519/486560/612328/482208/484721/488527/607180	7
KEGG_Pathway_Module_5	cfa05224	Breast cancer	43338	143/7482	1.70974e-08	1.88072e-07	1.07984e-07	611641/100855820/486560/612328/482208/484721/488527/607180	8
KEGG_Pathway_Module_5	cfa05226	Gastric cancer	43338	150/7482	2.49162e-08	1.92151e-07	1.10326e-07	611641/100855820/486560/612328/482208/484721/488527/607180	8
KEGG_Pathway_Module_5	cfa04390	Hippo signaling pathway	43338	153/7482	2.91138e-08	1.92151e-07	1.10326e-07	485850/475456/486560/612328/482208/484721/488527/607180	8
KEGG_Pathway_Module_5	cfa04310	Wnt signaling pathway	43307	140/7482	3.37749e-07	1.85762e-06	1.06658e-06	483374/486560/612328/482208/484721/488527/607180	7
KEGG_Pathway_Module_5	cfa04916	Melanogenesis	43277	100/7482	9.08945e-07	4.28503e-06	2.4603e-06	486560/612328/482208/484721/488527/607180	6
KEGG_Pathway_Module_5	cfa04350	TGF-beta signaling pathway	43246	82/7482	7.67712e-06	3.16681e-05	1.81826e-05	485590/485850/489028/475456/487612	5
KEGG_Pathway_Module_5	cfa04150	mTOR signaling pathway	43277	150/7482	9.71039e-06	3.3293e-05	1.91156e-05	486560/612328/482208/484721/488527/607180	6
KEGG_Pathway_Module_5	cfa04934	Cushing syndrome	43277	151/7482	1.00888e-05	3.3293e-05	1.91156e-05	486560/612328/482208/484721/488527/607180	6
KEGG_Pathway_Module_5	cfa05225	Hepatocellular carcinoma	43277	165/7482	1.67698e-05	5.03095e-05	2.88858e-05	486560/612328/482208/484721/488527/607180	6
KEGG_Pathway_Module_5	cfa04060	Cytokine-cytokine receptor interaction	43307	272/7482	2.82047e-05	7.75629e-05	4.45337e-05	485590/100856301/611149/477702/485850/488540/489028	7
KEGG_Pathway_Module_5	cfa05205	Proteoglycans in cancer	43277	196/7482	4.44907e-05	0.000112938	6.48447e-05	486560/612328/482208/484721/488527/607180	6
KEGG_Pathway_Module_5	cfa05165	Human papillomavirus infection	43277	337/7482	0.000854374	0.00201388	0.0011563	486560/612328/482208/484721/488527/607180	6
KEGG_Pathway_Module_5	cfa05218	Melanoma	43157	74/7482	0.0269101	0.0592021	0.0339916	611641/100855820	2
KEGG_Pathway_Module_5	cfa00534	Glycosaminoglycan biosynthesis - heparan sulfate / heparin	43126	24/7482	0.0802692	0.165555	0.0950557	487911	1
KEGG_Pathway_Module_5	cfa04744	Phototransduction	43126	28/7482	0.0930303	0.180588	0.103687	490902	1
KEGG_Pathway_Module_5	cfa00051	Fructose and mannose metabolism	43126	32/7482	0.105621	0.193639	0.11118	489715	1
KEGG_Pathway_Module_5	cfa05202	Transcriptional misregulation in cancer	43157	168/7482	0.114776	0.199348	0.114458	475456/612328	2
KEGG_Pathway_Module_5	cfa04151	PI3K-Akt signaling pathway	43185	355/7482	0.123337	0.203506	0.116846	611641/100855820/608653	3
KEGG_Pathway_Module_5	cfa04340	Hedgehog signaling pathway	43126	44/7482	0.142393	0.209203	0.120117	482519	1
KEGG_Pathway_Module_5	cfa04913	Ovarian steroidogenesis	43126	44/7482	0.142393	0.209203	0.120117	100856301	1
KEGG_Pathway_Module_5	cfa00520	Amino sugar and nucleotide sugar metabolism	43126	48/7482	0.154324	0.209203	0.120117	489715	1
KEGG_Pathway_Module_5	cfa05030	Cocaine addiction	43126	48/7482	0.154324	0.209203	0.120117	490902	1
KEGG_Pathway_Module_5	cfa04015	Rap1 signaling pathway	43157	205/7482	0.158487	0.209203	0.120117	611641/100855820	2
KEGG_Pathway_Module_5	cfa04810	Regulation of actin cytoskeleton	43157	212/7482	0.167099	0.212088	0.121773	611641/100855820	2
KEGG_Pathway_Module_5	cfa04014	Ras signaling pathway	43157	227/7482	0.185833	0.227129	0.130409	611641/100855820	2
KEGG_Pathway_Module_5	cfa04662	B cell receptor signaling pathway	43126	68/7482	0.211624	0.249414	0.143204	608653	1
KEGG_Pathway_Module_5	cfa04010	MAPK signaling pathway	43157	289/7482	0.265776	0.302434	0.173647	611641/100855820	2
KEGG_Pathway_Module_5	cfa05215	Prostate cancer	43126	94/7482	0.280554	0.308609	0.177192	486114	1
KEGG_Pathway_Module_5	cfa05418	Fluid shear stress and atherosclerosis	43126	135/7482	0.377623	0.401986	0.230805	485590	1
KEGG_Pathway_Module_5	cfa04360	Axon guidance	43126	173/7482	0.45625	0.470508	0.270148	484721	1
KEGG_Pathway_Module_5	cfa05206	MicroRNAs in cancer	43126	260/7482	0.601935	0.601935	0.345609	482208	1
