# Supplementary material for: Identification of hydatidosis-related modules and key regulatory genes
Source: PeerJ. 2020 Jun 18;8:e9280. doi: 10.7717/peerj.9280 (PMC7306218; doi:10.7717/peerj.9280)
Supplement: Supplemental Information 5 [file peerj-08-9280-s005.xlsx]

## Sheet: Sheet1
Table S5.Driving Genes of Human Hydatidosis
SUID	AverageShortestPathLength	BetweennessCentrality	ClosenessCentrality	ClusteringCoefficient	Degree	Eccentricity	IsSingleNode	name	NeighborhoodConnectivity	NumberOfDirectedEdges	NumberOfUndirectedEdges	PartnerOfMultiEdgedNodePairs	Radiality	selected	SelfLoops	shared name	Stress	TopologicalCoefficient
3711	1.58273	0.0208228	0.631818	0.575565	148	4	FALSE	RPS5	92.7095	148	0	0	0.902878	FALSE	0	RPS5	89594	0.375342
3668	1.59712	0.0166878	0.626126	0.592023	147	4	FALSE	RPS3	93.7415	147	0	0	0.90048	FALSE	0	RPS3	76650	0.37799
3676	1.58273	0.020575	0.631818	0.604215	144	4	FALSE	RPL5	94.1806	144	0	0	0.902878	FALSE	0	RPL5	73258	0.375221
3731	1.6295	0.00973171	0.613687	0.626411	142	4	FALSE	RPS2	95.8873	142	0	0	0.895084	FALSE	0	RPS2	52060	0.392981
3727	1.67266	0.026535	0.597849	0.596454	141	4	FALSE	RPS6	93.2979	141	0	0	0.88789	FALSE	0	RPS6	74826	0.393662
3701	1.67986	0.00988145	0.595289	0.623188	139	4	FALSE	RPSA	95.777	139	0	0	0.886691	FALSE	0	RPSA	46722	0.404122
3593	1.59353	0.0291558	0.62754	0.637893	138	3	FALSE	RPS9	97.8986	138	0	0	0.901079	FALSE	0	RPS9	112216	0.386951
3713	1.64748	0.0115935	0.606987	0.63821	138	4	FALSE	RPL11	96.2319	138	0	0	0.892086	FALSE	0	RPL11	44060	0.396016
3666	1.6259	0.0141917	0.615044	0.635251	137	4	FALSE	RPL4	96.781	137	0	0	0.895683	FALSE	0	RPL4	58208	0.393419
3561	1.63669	0.0237416	0.610989	0.657516	136	4	FALSE	RPL23A	97.6985	136	0	0	0.893885	FALSE	0	RPL23A	73864	0.400404
3525	1.64388	0.156245	0.608315	0.449972	135	4	FALSE	IMP3	86.2148	135	0	0	0.892686	FALSE	0	IMP3	550254	0.350467
3733	1.64388	0.0099249	0.608315	0.672195	135	4	FALSE	RPS11	99.5185	135	0	0	0.892686	FALSE	0	RPS11	62370	0.402909
3760	1.66187	0.00819454	0.601732	0.670757	135	4	FALSE	RPS15	98.5926	135	0	0	0.889688	FALSE	0	RPS15	40972	0.407407
3533	1.61871	0.0182992	0.617778	0.646617	134	4	FALSE	RPLP0	97.7612	134	0	0	0.896882	FALSE	0	RPLP0	71200	0.389487
3551	1.63669	0.0146275	0.610989	0.638537	134	4	FALSE	RPL3	97.2761	134	0	0	0.893885	FALSE	0	RPL3	63404	0.395431
3674	1.65468	0.00902711	0.604348	0.667153	134	4	FALSE	RPS16	98.903	134	0	0	0.890887	FALSE	0	RPS16	55394	0.403686
3691	1.67266	0.00664034	0.597849	0.682527	134	4	FALSE	RPS15A	99.7687	134	0	0	0.88789	FALSE	0	RPS15A	42462	0.415703
3719	1.67626	0.00981303	0.596567	0.674335	134	4	FALSE	RPL9	98.3209	134	0	0	0.88729	FALSE	0	RPL9	40566	0.411384
3649	1.66547	0.0071352	0.600432	0.68273	133	4	FALSE	RPS18	99.6015	133	0	0	0.889089	FALSE	0	RPS18	40784	0.409883
3660	1.64748	0.00970119	0.606987	0.676498	132	4	FALSE	RPL8	99.0152	132	0	0	0.892086	FALSE	0	RPL8	43512	0.404143
3717	1.66906	0.007192	0.599138	0.686792	132	4	FALSE	RPS20	99.9773	132	0	0	0.888489	FALSE	0	RPS20	43898	0.411429
3721	1.68705	0.00689544	0.592751	0.693037	132	4	FALSE	RPL23	99.5076	132	0	0	0.885492	FALSE	0	RPL23	33396	0.418099
3754	1.67986	0.0209275	0.595289	0.642983	131	4	FALSE	RPS13	97.7176	131	0	0	0.886691	FALSE	0	RPS13	92848	0.405467
3699	1.70144	0.00803108	0.587738	0.679428	130	4	FALSE	RPS3A	99.1462	130	0	0	0.883094	FALSE	0	RPS3A	39270	0.413109
3725	1.67986	0.00773137	0.595289	0.694041	129	4	FALSE	RPS29	100.132	129	0	0	0.886691	FALSE	0	RPS29	41850	0.412065
3523	1.65827	0.0114959	0.603037	0.689592	128	4	FALSE	RPL7	100.938	128	0	0	0.890288	FALSE	0	RPL7	52742	0.410315
3752	1.69424	0.0054568	0.590234	0.711614	128	4	FALSE	RPS23	101.664	128	0	0	0.884293	FALSE	0	RPS23	35022	0.4236
3885	1.70144	0.0067677	0.587738	0.705955	128	4	FALSE	RPL35	100.641	128	0	0	0.883094	FALSE	0	RPL35	33252	0.42286
3652	1.71223	0.00831525	0.584034	0.671041	127	4	FALSE	RPS4X	99.2362	127	0	0	0.881295	FALSE	0	RPS4X	39970	0.413484
3707	1.69065	0.00622444	0.591489	0.727492	126	4	FALSE	RPL13A	102.143	126	0	0	0.884892	FALSE	0	RPL13A	30834	0.420341
3809	1.71223	0.00537343	0.584034	0.732	125	4	FALSE	RPL27A	102.208	125	0	0	0.881295	FALSE	0	RPL27A	27228	0.429445
3688	1.75899	0.00558024	0.568507	0.72043	124	4	FALSE	RPL15	101.363	124	0	0	0.873501	FALSE	0	RPL15	18056	0.440708
3670	1.70144	0.0164912	0.587738	0.67413	123	4	FALSE	RPS8	99.4065	123	0	0	0.883094	FALSE	0	RPS8	79664	0.40908
3680	1.71942	0.00449845	0.58159	0.756497	123	4	FALSE	RPL17	103.821	123	0	0	0.880096	FALSE	0	RPL17	23740	0.436223
3697	1.69424	0.00792906	0.590234	0.693856	123	4	FALSE	RPL3L	101.033	123	0	0	0.884293	FALSE	0	RPL3L	40520	0.419222
3750	1.70144	0.00487709	0.587738	0.751833	123	4	FALSE	RPS14	104.309	123	0	0	0.883094	FALSE	0	RPS14	36198	0.429255
3517	1.73381	0.00597835	0.576763	0.728899	122	4	FALSE	RPS7	102.148	122	0	0	0.877698	FALSE	0	RPS7	29368	0.43467
3806	1.73022	0.00563557	0.577963	0.720905	122	4	FALSE	RPS4Y1	102.516	122	0	0	0.878297	FALSE	0	RPS4Y1	33346	0.427152
3662	1.7554	0.0048346	0.569672	0.737741	121	4	FALSE	RPS19	102.57	121	0	0	0.874101	FALSE	0	RPS19	23984	0.438334
3695	1.7446	0.00355631	0.573196	0.757989	121	4	FALSE	RPL26	103.95	121	0	0	0.875899	FALSE	0	RPL26	18844	0.446139
3803	1.7482	0.00504501	0.572016	0.72989	121	4	FALSE	RPS4Y2	103.116	121	0	0	0.8753	FALSE	0	RPS4Y2	29790	0.436931
3656	1.71583	0.00556182	0.582809	0.759664	120	4	FALSE	RPL12	104.217	120	0	0	0.880695	FALSE	0	RPL12	26216	0.430647
3682	1.7518	0.00245135	0.570842	0.779376	119	4	FALSE	RPL10	105.378	119	0	0	0.8747	FALSE	0	RPL10	15814	0.452267
3735	1.7518	0.00245135	0.570842	0.779376	119	4	FALSE	RPL10L	105.378	119	0	0	0.8747	FALSE	0	RPL10L	15814	0.452267
3773	1.7518	0.00334077	0.570842	0.771685	119	4	FALSE	RPL26L1	104.95	119	0	0	0.8747	FALSE	0	RPL26L1	18190	0.450427
3654	1.7482	0.00375475	0.572016	0.771814	116	4	FALSE	RPL10A	105	116	0	0	0.8753	FALSE	0	RPL10A	19452	0.443038
3746	1.77338	0.00528362	0.563895	0.75952	116	4	FALSE	RPS25	103.233	116	0	0	0.871103	FALSE	0	RPS25	19878	0.441166
3723	1.80576	0.00218892	0.553785	0.802441	115	4	FALSE	RPL18	106.591	115	0	0	0.865707	FALSE	0	RPL18	7962	0.471643
3748	1.79496	0.00221268	0.557114	0.80531	113	4	FALSE	RPS26	106.319	113	0	0	0.867506	FALSE	0	RPS26	12318	0.460254
3703	1.79137	0.00290965	0.558233	0.793275	112	4	FALSE	RPS24	105.5	112	0	0	0.868106	FALSE	0	RPS24	18460	0.45279
3763	1.90647	0.00312345	0.524528	0.812741	112	4	FALSE	RPL19	106.25	112	0	0	0.848921	FALSE	0	RPL19	10992	0.52599
3800	1.82734	0.00103404	0.547244	0.809041	112	4	FALSE	RPSAP58	107.455	112	0	0	0.86211	FALSE	0	RPSAP58	5442	0.481863
3960	1.82014	0.00115341	0.549407	0.824734	111	4	FALSE	RPS17	107.883	111	0	0	0.863309	FALSE	0	RPS17	6524	0.477358
3758	1.91727	0.014985	0.521576	0.81985	110	4	FALSE	RPL18A	106.973	110	0	0	0.847122	FALSE	0	RPL18A	32412	0.526914
3786	1.96763	0.00073546	0.508227	0.831193	110	4	FALSE	RPL13	107.382	110	0	0	0.838729	FALSE	0	RPL13	2722	0.562208
3992	1.79496	0.00247528	0.557114	0.804837	110	4	FALSE	RPS28	106.282	110	0	0	0.867506	FALSE	0	RPS28	14860	0.454196
3686	1.80935	0.00330443	0.552684	0.826757	108	4	FALSE	RPL31	107.148	108	0	0	0.865108	FALSE	0	RPL31	12696	0.465862
3813	1.84173	0.00222399	0.542969	0.728107	108	4	FALSE	MRPS7	101.676	108	0	0	0.859712	FALSE	0	MRPS7	13224	0.455946
3664	1.81655	0.00129644	0.550495	0.841298	107	4	FALSE	RPS21	108.346	107	0	0	0.863909	FALSE	0	RPS21	8748	0.469029
3709	1.81295	0.00269787	0.551587	0.806649	106	4	FALSE	RPS12	105.566	106	0	0	0.864508	FALSE	0	RPS12	15614	0.453073
3741	1.82374	0.0025961	0.548323	0.845283	106	4	FALSE	RPS27	108.104	106	0	0	0.86271	FALSE	0	RPS27	11472	0.470016
3658	1.9964	0.00034854	0.500901	0.879487	105	4	FALSE	RPL32	109.867	105	0	0	0.833933	FALSE	0	RPL32	1352	0.584397
3705	2	0.00026638	0.5	0.89059	104	4	FALSE	RPL21	110.654	104	0	0	0.833333	FALSE	0	RPL21	1204	0.588584
3756	1.81655	0.00332813	0.550495	0.834578	104	4	FALSE	RPL7A	107.019	104	0	0	0.863909	FALSE	0	RPL7A	15166	0.46129
3767	1.83453	0.00101549	0.545098	0.87528	104	4	FALSE	RPS10	110.788	104	0	0	0.860911	FALSE	0	RPS10	7746	0.483792
4675	1.85612	0.00049424	0.53876	0.878641	104	4	FALSE	RPS17L	111.519	104	0	0	0.857314	FALSE	0	RPS17L	3522	0.500086
3846	1.86331	0.0019478	0.53668	0.738886	102	4	FALSE	MRPL2	101.667	102	0	0	0.856115	FALSE	0	MRPL2	12022	0.455904
3983	1.85252	0.00063534	0.539806	0.886042	102	4	FALSE	RPS27L	110.696	102	0	0	0.857914	FALSE	0	RPS27L	4948	0.489806
3678	1.83813	0.00329091	0.544031	0.853465	101	4	FALSE	RPL30	108.248	101	0	0	0.860312	FALSE	0	RPL30	11200	0.472697
3967	1.99281	0.0006482	0.501805	0.869307	101	4	FALSE	RPL36AL	110.119	101	0	0	0.834532	FALSE	0	RPL36AL	2720	0.570564
4705	1.86691	0.0017493	0.535645	0.749703	101	4	FALSE	MRPS10	103.178	101	0	0	0.855516	FALSE	0	MRPS10	11986	0.462683
4826	1.8705	0.00171911	0.534615	0.750909	100	4	FALSE	MRPS9	103.15	100	0	0	0.854916	FALSE	0	MRPS9	11754	0.462556
3836	1.83453	0.00276685	0.545098	0.733045	99	4	FALSE	MRPS5	101.455	99	0	0	0.860911	FALSE	0	MRPS5	17336	0.441107
3975	2	0.0005747	0.5	0.883323	99	4	FALSE	RPL36A	110.899	99	0	0	0.833333	FALSE	0	RPL36A	2498	0.574606
4840	1.8777	0.00166518	0.532567	0.750979	99	4	FALSE	MRPS12	103.242	99	0	0	0.853717	FALSE	0	MRPS12	11458	0.465056
3765	1.85971	0.00117962	0.537718	0.892279	98	4	FALSE	RPL24	109.949	98	0	0	0.856715	FALSE	0	RPL24	5732	0.4865
4852	1.83453	0.00273002	0.545098	0.742268	98	4	FALSE	MRPL24	102.153	98	0	0	0.860911	FALSE	0	MRPL24	18004	0.442221
3715	2	0.001279	0.5	0.896263	97	4	FALSE	RPL27	109.753	97	0	0	0.833333	FALSE	0	RPL27	5002	0.562834
3737	2.0036	0.00160706	0.499102	0.887887	97	4	FALSE	RPL6	109.495	97	0	0	0.832734	FALSE	0	RPL6	5388	0.564406
3869	2.01079	0.00106249	0.497317	0.912371	97	4	FALSE	RPL35A	110.969	97	0	0	0.831535	FALSE	0	RPL35A	4272	0.577964
126	1.75909	0.0648346	0.568475	0.332811	95	4	FALSE	SF3A2	42.5474	95	0	0	0.848182	FALSE	0	SF3A2	38608	0.237636
3739	2.01799	0.00032217	0.495544	0.924524	95	4	FALSE	RPLP1	111.453	95	0	0	0.830336	FALSE	0	RPLP1	1500	0.580482
3821	2.01079	0.00041958	0.497317	0.931467	95	4	FALSE	RPL14	111.916	95	0	0	0.831535	FALSE	0	RPL14	1412	0.576886
3872	2.03237	8.292e-05	0.492035	0.950952	95	4	FALSE	RPL28	113.232	95	0	0	0.827938	FALSE	0	RPL28	444	0.602296
4662	2.03237	0.0002124	0.492035	0.916909	95	4	FALSE	FAU	112.253	95	0	0	0.827938	FALSE	0	FAU	780	0.597088
3743	2.03597	0.00022381	0.491166	0.932739	94	4	FALSE	RPLP2	111.564	94	0	0	0.827338	FALSE	0	RPLP2	696	0.593425
3782	1.89209	0.00046896	0.528517	0.892016	94	4	FALSE	GNB2L1	112.447	94	0	0	0.851319	FALSE	0	GNB2L1	3092	0.504246
4272	2.02878	0.00088503	0.492908	0.920842	94	4	FALSE	RPL36	111.447	94	0	0	0.828537	FALSE	0	RPL36	1866	0.586562
4678	2.03597	0.0001001	0.491166	0.948296	94	4	FALSE	RPL37A	113.043	94	0	0	0.827338	FALSE	0	RPL37A	472	0.60129
4767	2.02878	0.00043214	0.492908	0.932211	93	4	FALSE	RPL38	112.151	93	0	0	0.828537	FALSE	0	RPL38	1736	0.587176
4850	1.89568	0.00153425	0.527514	0.764843	93	4	FALSE	MRPL22	103.419	93	0	0	0.850719	FALSE	0	MRPL22	10720	0.463764
4667	2.01799	0.00075185	0.495544	0.917821	92	4	FALSE	RPL39	111.75	92	0	0	0.830336	FALSE	0	RPL39	2528	0.573077
4504	2.02518	0.00142516	0.493783	0.915018	91	4	FALSE	RPL29	111.747	91	0	0	0.829137	FALSE	0	RPL29	5608	0.576017
4716	1.90288	0.00048724	0.52552	0.857143	91	4	FALSE	RPL7L1	111.758	91	0	0	0.84952	FALSE	0	RPL7L1	3636	0.501158
4765	2.04676	0.00021645	0.488576	0.902564	91	4	FALSE	RPL36A-HNRNPH2	111.934	91	0	0	0.82554	FALSE	0	RPL36A-HNRNPH2	828	0.595394
4869	1.90288	0.00129139	0.52552	0.772161	91	4	FALSE	MRPS2	104.198	91	0	0	0.84952	FALSE	0	MRPS2	9496	0.467255
4760	2.05036	4.982e-05	0.487719	0.971286	90	4	FALSE	RPL34	114.333	90	0	0	0.82494	FALSE	0	RPL34	242	0.608156
4738	2.04317	0.00028559	0.489437	0.959142	89	4	FALSE	RPL39L	114.258	89	0	0	0.826139	FALSE	0	RPL39L	1414	0.598212
4754	1.92446	0.00144675	0.519626	0.742084	89	4	FALSE	MRPS14	100.989	89	0	0	0.845923	FALSE	0	MRPS14	9742	0.461136
3797	1.91727	0.0004504	0.521576	0.880878	88	4	FALSE	WDR31	111.511	88	0	0	0.847122	FALSE	0	WDR31	2958	0.502303
192	1.82727	0.017527	0.547264	0.487303	87	4	FALSE	PRPF19	50.3448	87	0	0	0.834545	FALSE	0	PRPF19	19396	0.291011
4867	1.92086	0.00129971	0.520599	0.770178	86	4	FALSE	MRPL13	102.186	86	0	0	0.846523	FALSE	0	MRPL13	9358	0.458233
4824	1.92446	0.00122775	0.519626	0.778711	85	4	FALSE	MRPL16	102.918	85	0	0	0.845923	FALSE	0	MRPL16	9286	0.461514
205	1.86818	0.0151359	0.53528	0.506598	84	4	FALSE	PRPF8	50.5833	84	0	0	0.826364	FALSE	0	PRPF8	16060	0.29931
4455	2.06475	0.00029511	0.484321	0.973035	84	4	FALSE	RPL22	115.583	84	0	0	0.822542	FALSE	0	RPL22	694	0.608333
3539	1.8741	0.0105623	0.533589	0.672348	83	4	FALSE	MRTO4	101.41	83	0	0	0.854317	FALSE	0	MRTO4	41154	0.433375
3879	1.94245	0.00130852	0.514815	0.761387	83	4	FALSE	MRPL15	100.253	83	0	0	0.842926	FALSE	0	MRPL15	8764	0.455696
4828	1.93525	0.00101667	0.516729	0.793711	83	4	FALSE	MRPS11	104.398	83	0	0	0.844125	FALSE	0	MRPS11	7996	0.470259
7155	2.07554	3.58e-06	0.481802	0.99618	83	4	FALSE	RPL37	116.386	83	0	0	0.820743	FALSE	0	RPL37	26	0.619072
335	1.85	0.0267802	0.540541	0.478169	82	4	FALSE	LSM2	50.2195	82	0	0	0.83	FALSE	0	LSM2	22956	0.290286
4865	1.93885	0.00109216	0.51577	0.788618	82	4	FALSE	MRPL4	102.854	82	0	0	0.843525	FALSE	0	MRPL4	8656	0.463305
7180	2.08273	4.65e-06	0.480138	0.994753	81	4	FALSE	RPL22L1	116.716	81	0	0	0.819544	FALSE	0	RPL22L1	34	0.62083
4842	1.96043	0.00107065	0.510092	0.782214	79	4	FALSE	MRPL11	101.278	79	0	0	0.839928	FALSE	0	MRPL11	8128	0.462459
4703	2.09353	2.639e-05	0.477663	0.975358	78	4	FALSE	RSRC1	116.5	78	0	0	0.817746	FALSE	0	RSRC1	154	0.619681
3856	1.95683	0.00110594	0.511029	0.785714	77	4	FALSE	MRPL3	100.792	77	0	0	0.840528	FALSE	0	MRPL3	8372	0.454019
209	1.80909	0.0485667	0.552764	0.49193	76	3	FALSE	SNRPF	50.2895	76	0	0	0.838182	FALSE	0	SNRPF	34040	0.271764
82	1.84091	0.0277567	0.54321	0.517838	75	4	FALSE	EFTUD2	51.6933	75	0	0	0.831818	FALSE	0	EFTUD2	22468	0.280942
215	1.89545	0.00689041	0.527578	0.567207	75	4	FALSE	SNRPD2	53.4	75	0	0	0.820909	FALSE	0	SNRPD2	9888	0.314118
4727	1.96403	0.00101842	0.509158	0.758559	75	4	FALSE	MRPS15	101.173	75	0	0	0.839329	FALSE	0	MRPS15	8250	0.455736
166	1.80909	0.0517345	0.552764	0.368382	74	3	FALSE	U2AF2	44.3784	74	0	0	0.838182	FALSE	0	U2AF2	35236	0.238448
196	1.92273	0.00602794	0.520095	0.570529	74	4	FALSE	SNRPD1	53.2973	74	0	0	0.815455	FALSE	0	SNRPD1	7866	0.319145
232	1.93636	0.00961352	0.516432	0.555175	73	4	FALSE	SF3B1	53.3973	73	0	0	0.812727	FALSE	0	SF3B1	9724	0.32362
317	1.89091	0.0126352	0.528846	0.482877	73	4	FALSE	HNRNPA1	50.4795	73	0	0	0.821818	FALSE	0	HNRNPA1	12302	0.291789
3672	1.96763	0.00016937	0.508227	0.946347	73	4	FALSE	EEF2	118.507	73	0	0	0.838729	FALSE	0	EEF2	1458	0.531421
234	1.92727	0.00555728	0.518868	0.582942	72	4	FALSE	SNRPD3	53.5139	72	0	0	0.814545	FALSE	0	SNRPD3	8728	0.322373
237	1.93182	0.00613733	0.517647	0.587637	72	4	FALSE	SNRPA1	54.4861	72	0	0	0.813636	FALSE	0	SNRPA1	8454	0.330219
211	1.92273	0.00802877	0.520095	0.56499	71	4	FALSE	CDC5L	53.8169	71	0	0	0.815455	FALSE	0	CDC5L	10836	0.320339
228	1.93636	0.00683133	0.516432	0.558149	71	4	FALSE	SNRPB	52.3662	71	0	0	0.812727	FALSE	0	SNRPB	9018	0.31357
230	1.93636	0.00382917	0.516432	0.600828	70	4	FALSE	SF3B3	55.6571	70	0	0	0.812727	FALSE	0	SF3B3	5622	0.335284
4838	1.9964	0.00079452	0.500901	0.814493	70	4	FALSE	MRPL1	100.557	70	0	0	0.833933	FALSE	0	MRPL1	6876	0.461271
224	1.93636	0.0101228	0.516432	0.578858	69	4	FALSE	SNRPG	53.2754	69	0	0	0.812727	FALSE	0	SNRPG	14546	0.315239
198	1.94545	0.00413007	0.514019	0.604478	68	4	FALSE	SNRNP200	54.4118	68	0	0	0.810909	FALSE	0	SNRNP200	7122	0.32388
108	1.79545	0.0261061	0.556962	0.486205	67	3	FALSE	HNRNPC	52.9254	67	0	0	0.840909	FALSE	0	HNRNPC	24778	0.268581
190	1.92727	0.0118026	0.518868	0.554048	67	4	FALSE	SNRPE	52.0448	67	0	0	0.814545	FALSE	0	SNRPE	13412	0.304355
164	1.79091	0.0244327	0.558376	0.457809	66	3	FALSE	SRSF1	50.7879	66	0	0	0.841818	FALSE	0	SRSF1	29440	0.253939
181	1.95909	0.00244009	0.510441	0.646154	66	4	FALSE	CDC40	57.197	66	0	0	0.808182	FALSE	0	CDC40	5680	0.346648
201	1.96818	0.00257905	0.508083	0.643357	66	4	FALSE	CRNKL1	56.4394	66	0	0	0.806364	FALSE	0	CRNKL1	6142	0.346254
221	1.96818	0.00773157	0.508083	0.574825	66	4	FALSE	SNW1	53.3485	66	0	0	0.806364	FALSE	0	SNW1	10030	0.323324
341	1.92273	0.00774284	0.520095	0.561305	66	4	FALSE	SNRNP70	55.2727	66	0	0	0.815455	FALSE	0	SNRNP70	8432	0.319496
120	1.93182	0.00459862	0.517647	0.640865	65	4	FALSE	PLRG1	57.2615	65	0	0	0.813636	FALSE	0	PLRG1	8540	0.332916
186	1.98182	0.00328065	0.504587	0.622596	65	4	FALSE	SNRPN	54.2769	65	0	0	0.803636	FALSE	0	SNRPN	5308	0.332987
339	1.94091	0.00765182	0.515222	0.567788	65	4	FALSE	SF3A3	54.2769	65	0	0	0.811818	FALSE	0	SF3A3	8184	0.319276
3519	1.96043	0.0268044	0.510092	0.471635	65	4	FALSE	FBL	74.6615	65	0	0	0.839928	FALSE	0	FBL	136792	0.319066
217	1.97727	0.00906913	0.505747	0.548115	64	4	FALSE	PRPF3	51.3125	64	0	0	0.804545	FALSE	0	PRPF3	7670	0.310985
322	1.88636	0.0180571	0.53012	0.435516	64	4	FALSE	DHX15	48.9531	64	0	0	0.822727	FALSE	0	DHX15	12414	0.267503
343	1.93182	0.0113073	0.517647	0.543651	64	4	FALSE	SNRPA	54.2656	64	0	0	0.813636	FALSE	0	SNRPA	9632	0.313674
4712	2.15108	4.865e-05	0.464883	0.937996	64	4	FALSE	PLEC	115.328	64	0	0	0.808153	FALSE	0	PLEC	264	0.616728
203	2.01364	0.00186539	0.496614	0.659498	63	4	FALSE	XAB2	56.6667	63	0	0	0.797273	FALSE	0	XAB2	4818	0.35865
311	1.99091	0.00446814	0.502283	0.611367	63	4	FALSE	SNRPB2	56.6349	63	0	0	0.801818	FALSE	0	SNRPB2	5932	0.35177
3521	1.95683	0.0209791	0.511029	0.554019	63	4	FALSE	PDCD11	72.0476	63	0	0	0.840528	FALSE	0	PDCD11	131784	0.31055
3549	1.92806	0.0359884	0.518657	0.513057	63	4	FALSE	PES1	61.1111	63	0	0	0.845324	FALSE	0	PES1	115544	0.25463
3648	2.14748	0.00024803	0.465662	0.946749	63	4	FALSE	EEF1A1	118.175	63	0	0	0.808753	FALSE	0	EEF1A1	566	0.628588
183	2.03636	0.00309207	0.491071	0.632998	62	4	FALSE	BUD31	55.8871	62	0	0	0.792727	FALSE	0	BUD31	6246	0.362903
94	1.80455	0.05648	0.554156	0.37541	61	3	FALSE	NCBP1	47.2459	61	0	0	0.839091	FALSE	0	NCBP1	48792	0.233891
389	1.98636	0.00387397	0.503432	0.602732	61	4	FALSE	SART1	54.8361	61	0	0	0.802727	FALSE	0	SART1	6720	0.330338
3531	2.02518	0.0188872	0.493783	0.581967	61	4	FALSE	KRR1	55.5246	61	0	0	0.829137	FALSE	0	KRR1	93694	0.252385
3537	2.06475	0.0223205	0.484321	0.579781	61	4	FALSE	IMP4	43.6393	61	0	0	0.822542	FALSE	0	IMP4	49166	0.207806
3918	2.15468	0.00456528	0.464107	0.714754	61	4	FALSE	EIF1AX	104.934	61	0	0	0.807554	FALSE	0	EIF1AX	33418	0.549395
327	1.98182	0.00477239	0.504587	0.583616	60	4	FALSE	SF3B2	55.0667	60	0	0	0.803636	FALSE	0	SF3B2	5194	0.331727
4819	2.20863	0.00026091	0.452769	0.826376	58	4	FALSE	MRPL17	94.0862	58	0	0	0.798561	FALSE	0	MRPL17	1874	0.522701
207	2.07727	0.00194468	0.4814	0.672306	57	4	FALSE	RBM22	56.8246	57	0	0	0.784545	FALSE	0	RBM22	3966	0.37883
315	2.05	0.00765392	0.487805	0.49812	57	4	FALSE	HNRNPD	50.7193	57	0	0	0.79	FALSE	0	HNRNPD	7102	0.325124
100	1.81364	0.0266989	0.551378	0.412987	56	3	FALSE	SRSF5	50.625	56	0	0	0.837273	FALSE	0	SRSF5	31506	0.248074
302	2.04545	0.00298282	0.488889	0.605195	56	4	FALSE	HNRNPA2B1	56.0714	56	0	0	0.790909	FALSE	0	HNRNPA2B1	3882	0.354882
332	2.04091	0.00251857	0.489978	0.641558	56	4	FALSE	SRRM2	57.5536	56	0	0	0.791818	FALSE	0	SRRM2	2824	0.361972
394	2.05455	0.00236816	0.486726	0.627609	55	4	FALSE	SF3A1	55.9818	55	0	0	0.789091	FALSE	0	SF3A1	2842	0.361173
4834	2.22302	0.00022399	0.449838	0.837037	55	4	FALSE	MRPL12	93.1818	55	0	0	0.796163	FALSE	0	MRPL12	1746	0.520569
3515	1.98921	0.022313	0.502712	0.620545	54	4	FALSE	WDR12	58.2778	54	0	0	0.835132	FALSE	0	WDR12	78758	0.250119
3541	2.03237	0.00946866	0.492035	0.70021	54	4	FALSE	WDR3	51.7037	54	0	0	0.827938	FALSE	0	WDR3	44102	0.229794
3555	2.11151	0.00451398	0.473595	0.712788	54	5	FALSE	PWP2	47.6111	54	0	0	0.814748	FALSE	0	PWP2	21564	0.220422
3557	2.01079	0.00971997	0.497317	0.689727	54	4	FALSE	UTP15	53.8148	54	0	0	0.831535	FALSE	0	UTP15	51004	0.232965
3547	2.09712	0.00532651	0.476844	0.729318	53	5	FALSE	NOP14	49.0189	53	0	0	0.817146	FALSE	0	NOP14	27602	0.222813
16756	2.30216	0.0061008	0.434375	0.723512	53	5	FALSE	BMS1	44.2642	53	0	0	0.782974	FALSE	0	BMS1	31238	0.260377
106	2.00455	0.00455423	0.498866	0.608597	52	4	FALSE	PRPF6	53.75	52	0	0	0.799091	FALSE	0	PRPF6	5454	0.314327
775	2.01818	0.00361603	0.495495	0.545249	52	4	FALSE	SNRPC	54.5577	52	0	0	0.796364	FALSE	0	SNRPC	5032	0.328661
14960	1.07143	0.0229617	0.933333	0.722474	52	2	FALSE	NDUFS3	38.9423	52	0	0	0.97619	FALSE	0	NDUFS3	772	0.695398
16805	2.31295	0.00240506	0.432348	0.748869	52	5	FALSE	UTP6	45.1731	52	0	0	0.781175	FALSE	0	UTP6	7118	0.268887
3559	2.02158	0.0131363	0.494662	0.582745	51	4	FALSE	RCL1	69.6667	51	0	0	0.829736	FALSE	0	RCL1	78000	0.301587
11927	2.54237	0.180646	0.393333	0.712941	51	6	FALSE	PSMD6	38.7255	51	0	0	0.871469	FALSE	0	PSMD6	361504	0.420929
14946	1.08929	0.0271209	0.918033	0.734118	51	2	FALSE	NDUFS7	39.2157	51	0	0	0.970238	FALSE	0	NDUFS7	734	0.70028
14962	1.08929	0.0470773	0.918033	0.741961	51	2	FALSE	NDUFS2	39.3922	51	0	0	0.970238	FALSE	0	NDUFS2	756	0.715865
14992	1.08929	0.0246294	0.918033	0.741961	51	2	FALSE	NDUFS8	39.4118	51	0	0	0.970238	FALSE	0	NDUFS8	714	0.703782
16792	2.31655	0.00215728	0.431677	0.749804	51	5	FALSE	TBL3	45.4314	51	0	0	0.780576	FALSE	0	TBL3	6068	0.270425
275	2.03636	0.00730414	0.491071	0.528163	50	4	FALSE	DHX38	52.42	50	0	0	0.792727	FALSE	0	DHX38	8292	0.315783
3512	1.97482	0.0105866	0.506375	0.685714	50	4	FALSE	BOP1	57.1	50	0	0	0.83753	FALSE	0	BOP1	46610	0.238912
4732	2.02518	0.00035122	0.493783	0.879184	50	4	FALSE	NSA2	114.26	50	0	0	0.829137	FALSE	0	NSA2	2010	0.503348
4858	2.33094	0.00015543	0.429012	0.844082	50	5	FALSE	MRPL36	89.3	50	0	0	0.778177	FALSE	0	MRPL36	806	0.547853
11915	2.65537	0.072865	0.376596	0.740408	50	6	FALSE	PSMD12	38.8	50	0	0	0.862053	FALSE	0	PSMD12	227168	0.531233
11947	2.83616	0.0610106	0.35259	0.719184	50	7	FALSE	PSMD11	38.62	50	0	0	0.846987	FALSE	0	PSMD11	245654	0.470976
11965	2.71186	0.0423584	0.36875	0.748571	50	6	FALSE	PSMC1	38.86	50	0	0	0.857345	FALSE	0	PSMC1	209054	0.571471
14956	1.10714	0.015378	0.903226	0.779592	50	2	FALSE	NDUFA13	40.34	50	0	0	0.964286	FALSE	0	NDUFA13	554	0.720357
16816	2.32014	0.00106321	0.431008	0.803265	50	5	FALSE	WDR46	46.6	50	0	0	0.779976	FALSE	0	WDR46	4664	0.277381
16828	2.33813	0.00251562	0.427692	0.800816	50	5	FALSE	BYSL	46.2	50	0	0	0.776978	FALSE	0	BYSL	25494	0.283436
16838	2.33094	0.00446385	0.429012	0.771429	50	5	FALSE	MPHOSPH10	45.52	50	0	0	0.778177	FALSE	0	MPHOSPH10	27644	0.275879
81	1.88182	0.0631184	0.531401	0.227891	49	3	FALSE	ALYREF	32.6531	49	0	0	0.823636	FALSE	0	ALYREF	41942	0.165752
88	1.85455	0.0163083	0.539216	0.497449	49	3	FALSE	SRSF6	52.7551	49	0	0	0.829091	FALSE	0	SRSF6	22766	0.259877
3527	2.1259	0.00177593	0.470389	0.791667	49	4	FALSE	CIRH1A	48.7551	49	0	0	0.81235	FALSE	0	CIRH1A	9718	0.23783
3609	2.15468	0.0594585	0.464107	0.609694	49	4	FALSE	SEC61A1	99.7551	49	0	0	0.807554	FALSE	0	SEC61A1	310686	0.501282
11917	2.70621	0.0639699	0.36952	0.742347	49	6	FALSE	PSMC3	38.7959	49	0	0	0.857815	FALSE	0	PSMC3	219708	0.561964
11959	2.80226	0.0592785	0.356855	0.767857	49	7	FALSE	PSMD14	40.5306	49	0	0	0.849812	FALSE	0	PSMD14	355042	0.45034
11961	2.71751	0.0441978	0.367983	0.744048	49	6	FALSE	PSMD3	38.7755	49	0	0	0.856874	FALSE	0	PSMD3	208670	0.570228
14958	1.125	0.0104918	0.888889	0.805272	49	2	FALSE	NDUFS5	41	49	0	0	0.958333	FALSE	0	NDUFS5	460	0.732143
14984	1.125	0.0104369	0.888889	0.804422	49	2	FALSE	NDUFV1	40.9592	49	0	0	0.958333	FALSE	0	NDUFV1	476	0.731414
14990	1.125	0.0154631	0.888889	0.789116	49	2	FALSE	NDUFS1	40.5102	49	0	0	0.958333	FALSE	0	NDUFS1	526	0.723396
15012	1.125	0.0176471	0.888889	0.784864	49	2	FALSE	NDUFS4	40.4898	49	0	0	0.958333	FALSE	0	NDUFS4	554	0.723032
16770	2.34173	0.00296652	0.427035	0.771258	49	5	FALSE	PNO1	45.3878	49	0	0	0.776379	FALSE	0	PNO1	26586	0.278452
16784	2.32014	0.0011965	0.431008	0.815476	49	5	FALSE	RRP9	46.8571	49	0	0	0.779976	FALSE	0	RRP9	4470	0.277261
162	2.01364	0.00410141	0.496614	0.531028	48	4	FALSE	HNRNPM	54.9792	48	0	0	0.797273	FALSE	0	HNRNPM	5150	0.317799
194	2.05	0.00260527	0.487805	0.653369	48	4	FALSE	PPIE	58.8958	48	0	0	0.79	FALSE	0	PPIE	2994	0.356944
3920	2.23022	0.00264423	0.448387	0.641844	48	4	FALSE	EIF2S1	92.0625	48	0	0	0.794964	FALSE	0	EIF2S1	22962	0.497635
3944	2.18705	0.00305078	0.457237	0.58422	48	4	FALSE	EIF3I	84.0625	48	0	0	0.802158	FALSE	0	EIF3I	23734	0.435557
5071	2.08993	0.00047473	0.478485	0.852837	48	4	FALSE	MRPS6	93.25	48	0	0	0.818345	FALSE	0	MRPS6	4940	0.433721
5079	2.11151	0.00049297	0.473595	0.835993	48	4	FALSE	MRPS18A	94.1458	48	0	0	0.814748	FALSE	0	MRPS18A	5114	0.439934
11953	3.0339	0.00141029	0.329609	0.81117	48	7	FALSE	PSMC2	40.3958	48	0	0	0.830508	FALSE	0	PSMC2	1458	0.612058
11969	3.0339	0.00156883	0.329609	0.803191	48	7	FALSE	PSMC4	40.2083	48	0	0	0.830508	FALSE	0	PSMC4	1498	0.609217
14966	1.14286	0.0103081	0.875	0.824468	48	2	FALSE	NDUFB5	41.3333	48	0	0	0.952381	FALSE	0	NDUFB5	418	0.738095
16761	2.33094	0.00360495	0.429012	0.786348	48	5	FALSE	NOP56	46.4583	48	0	0	0.778177	FALSE	0	NOP56	13288	0.278194
16766	2.33094	0.00423868	0.429012	0.804078	48	5	FALSE	NOP58	46.75	48	0	0	0.778177	FALSE	0	NOP58	16304	0.281501
16778	2.33453	0.00074439	0.428351	0.808511	48	5	FALSE	WDR36	46.8542	48	0	0	0.777578	FALSE	0	WDR36	2806	0.282254
16797	2.33094	0.00086573	0.429012	0.83422	48	5	FALSE	DDX52	47.3958	48	0	0	0.778177	FALSE	0	DDX52	4280	0.283807
122	2.06364	0.0034018	0.484581	0.642923	47	4	FALSE	DDX23	56.5319	47	0	0	0.787273	FALSE	0	DDX23	3990	0.336499
158	1.92273	0.0292694	0.520095	0.320999	47	3	FALSE	EIF4A3	40.2128	47	0	0	0.815455	FALSE	0	EIF4A3	24354	0.211646
325	2.10455	0.00396572	0.475162	0.575393	47	4	FALSE	HNRNPA3	55.0638	47	0	0	0.779091	FALSE	0	HNRNPA3	3864	0.355251
4845	2.09712	0.00051065	0.476844	0.847364	47	4	FALSE	MRPS16	90.7872	47	0	0	0.817146	FALSE	0	MRPS16	5092	0.424239
5090	2.11511	0.00046185	0.472789	0.848289	47	4	FALSE	MRPS18C	93.383	47	0	0	0.814149	FALSE	0	MRPS18C	4704	0.436369
7332	2.21223	0.00041249	0.452033	0.963922	47	4	FALSE	RPL41	116.638	47	0	0	0.797962	FALSE	0	RPL41	2314	0.613886
11907	2.88136	0.0149622	0.347059	0.805735	47	7	FALSE	PSMA6	41.3617	47	0	0	0.84322	FALSE	0	PSMA6	87312	0.48095
11919	3.0226	0.0237378	0.330841	0.790934	47	7	FALSE	PSMC6	40.0426	47	0	0	0.83145	FALSE	0	PSMC6	28256	0.588548
11929	2.88136	0.0149622	0.347059	0.805735	47	7	FALSE	PSMA4	41.3617	47	0	0	0.84322	FALSE	0	PSMA4	87312	0.48095
11939	2.9435	0.00410634	0.339731	0.832562	47	7	FALSE	PSMA3	41.3191	47	0	0	0.838041	FALSE	0	PSMA3	8408	0.523027
15014	1.16071	0.00640498	0.861538	0.850139	47	2	FALSE	NDUFA12	41.9574	47	0	0	0.946429	FALSE	0	NDUFA12	336	0.74924
15023	1.16071	0.0101073	0.861538	0.838113	47	2	FALSE	NDUFV2	41.6596	47	0	0	0.946429	FALSE	0	NDUFV2	374	0.743921
16782	2.50719	0.00084461	0.398852	0.833488	47	5	FALSE	WDR43	45.6383	47	0	0	0.748801	FALSE	0	WDR43	2138	0.383515
16802	2.33094	0.00086612	0.429012	0.852914	47	5	FALSE	UTP18	48.1915	47	0	0	0.778177	FALSE	0	UTP18	4278	0.286854
90	1.87727	0.0280952	0.532688	0.455072	46	3	FALSE	NCBP2	50.3261	46	0	0	0.824545	FALSE	0	NCBP2	25210	0.250379
295	1.89091	0.0183915	0.528846	0.527536	46	3	FALSE	SRSF9	54.5652	46	0	0	0.821818	FALSE	0	SRSF9	15948	0.275582
3924	2.26259	0.00605149	0.441971	0.507246	46	4	FALSE	EIF3A	70.6522	46	0	0	0.789568	FALSE	0	EIF3A	31646	0.386077
3942	2.22662	0.00268814	0.449111	0.543961	46	5	FALSE	EIF3B	76.1304	46	0	0	0.795564	FALSE	0	EIF3B	23488	0.398589
11903	3.0452	0.00056421	0.328386	0.864734	46	7	FALSE	PSMD1	41.7174	46	0	0	0.829567	FALSE	0	PSMD1	452	0.632082
11905	2.73446	0.0368328	0.365702	0.829952	46	6	FALSE	PSMD4	40.9565	46	0	0	0.855461	FALSE	0	PSMD4	205042	0.602302
11923	2.84746	0.0471329	0.35119	0.807729	46	7	FALSE	PSMD7	41.3043	46	0	0	0.846045	FALSE	0	PSMD7	283076	0.485934
11951	2.9661	0.00533405	0.337143	0.835749	46	7	FALSE	PSMB4	41.3261	46	0	0	0.836158	FALSE	0	PSMB4	15070	0.543764
11957	3.0452	0.00122105	0.328386	0.831884	46	7	FALSE	PSMC5	40.9783	46	0	0	0.829567	FALSE	0	PSMC5	1348	0.620883
11967	2.94915	0.00652112	0.33908	0.83285	46	7	FALSE	PSMA1	41.3696	46	0	0	0.837571	FALSE	0	PSMA1	15316	0.523665
14976	1.17857	0.0039031	0.848485	0.878261	46	2	FALSE	NDUFB8	42.5	46	0	0	0.940476	FALSE	0	NDUFB8	260	0.758929
14982	1.17857	0.00465185	0.848485	0.870531	46	2	FALSE	NDUFA8	42.4348	46	0	0	0.940476	FALSE	0	NDUFA8	270	0.757764
15009	1.17857	0.00716186	0.848485	0.847343	46	2	FALSE	NDUFA11	41.9565	46	0	0	0.940476	FALSE	0	NDUFA11	332	0.749224
15026	1.17857	0.00441757	0.848485	0.871498	46	2	FALSE	NDUFA1	42.4565	46	0	0	0.940476	FALSE	0	NDUFA1	278	0.758152
15040	1.17857	0.00697456	0.848485	0.858937	46	2	FALSE	NDUFA2	42.0435	46	0	0	0.940476	FALSE	0	NDUFA2	306	0.750776
15045	1.17857	0.00520592	0.848485	0.863768	46	2	FALSE	NDUFB10	42.3043	46	0	0	0.940476	FALSE	0	NDUFB10	292	0.755435
16795	2.32734	0.00102455	0.429675	0.849275	46	5	FALSE	NOC4L	48.1739	46	0	0	0.778777	FALSE	0	NOC4L	2594	0.283376
16830	2.35252	0.00281972	0.425076	0.838647	46	5	FALSE	TSR1	47.6087	46	0	0	0.77458	FALSE	0	TSR1	27202	0.292078
132	1.87273	0.0170613	0.533981	0.494949	45	3	FALSE	SRSF4	54.1111	45	0	0	0.825455	FALSE	0	SRSF4	22566	0.266557
252	1.98636	0.00710154	0.503432	0.536364	45	3	FALSE	U2AF1	53.5333	45	0	0	0.802727	FALSE	0	U2AF1	7676	0.300749
11911	2.9548	0.00526304	0.338432	0.853535	45	7	FALSE	PSMB2	42.1778	45	0	0	0.8371	FALSE	0	PSMB2	15690	0.533896
11913	2.97175	0.00249802	0.336502	0.870707	45	7	FALSE	PSMB1	42.1778	45	0	0	0.835687	FALSE	0	PSMB1	7998	0.554971
11931	3.05085	0.00118473	0.327778	0.835354	45	7	FALSE	PSMD2	41.1333	45	0	0	0.829096	FALSE	0	PSMD2	1326	0.623232
11971	2.97175	0.00249802	0.336502	0.870707	45	7	FALSE	PSMB3	42.1778	45	0	0	0.835687	FALSE	0	PSMB3	7998	0.554971
11979	3.05085	0.00064254	0.327778	0.868687	45	7	FALSE	PSMD8	41.8444	45	0	0	0.829096	FALSE	0	PSMD8	422	0.634007
14970	1.19643	0.00634349	0.835821	0.857576	45	2	FALSE	NDUFB11	42.2667	45	0	0	0.934524	FALSE	0	NDUFB11	282	0.754762
14997	1.19643	0.00709391	0.835821	0.876768	45	2	FALSE	NDUFC2	42.5556	45	0	0	0.934524	FALSE	0	NDUFC2	256	0.759921
15043	1.19643	0.00441377	0.835821	0.888889	45	2	FALSE	NDUFAB1	42.6889	45	0	0	0.934524	FALSE	0	NDUFAB1	232	0.762302
16786	2.35612	0.00050689	0.424427	0.862626	45	5	FALSE	WDR75	48.3333	45	0	0	0.773981	FALSE	0	WDR75	1956	0.296524
3613	2.20144	0.0233182	0.454248	0.686047	44	4	FALSE	SEC61A2	107.386	44	0	0	0.79976	FALSE	0	SEC61A2	154862	0.562232
4832	2.34892	9.484e-05	0.425727	0.878436	44	5	FALSE	MRPL27	85.3409	44	0	0	0.77518	FALSE	0	MRPL27	612	0.523564
11909	2.9774	0.00501968	0.335863	0.853066	44	7	FALSE	PSMB7	41.8864	44	0	0	0.835217	FALSE	0	PSMB7	14890	0.551136
11937	2.9774	0.00229731	0.335863	0.892178	44	7	FALSE	PSMB6	42.7273	44	0	0	0.835217	FALSE	0	PSMB6	7862	0.562201
11949	2.96045	0.00320627	0.337786	0.884778	44	7	FALSE	PSMA5	42.6818	44	0	0	0.836629	FALSE	0	PSMA5	8068	0.540276
11975	2.74576	0.0355848	0.364198	0.831924	44	6	FALSE	PSMD13	41.1818	44	0	0	0.85452	FALSE	0	PSMD13	202476	0.605615
15016	1.21429	0.00190943	0.823529	0.921776	44	2	FALSE	NDUFA6	43.3409	44	0	0	0.928571	FALSE	0	NDUFA6	156	0.773945
15028	1.21429	0.00250286	0.823529	0.913319	44	2	FALSE	NDUFA5	43.3409	44	0	0	0.928571	FALSE	0	NDUFA5	166	0.773945
15038	1.21429	0.00185258	0.823529	0.921776	44	2	FALSE	NDUFB9	43.4773	44	0	0	0.928571	FALSE	0	NDUFB9	150	0.77638
15047	1.21429	0.00214108	0.823529	0.91649	44	2	FALSE	NDUFB4	43.3409	44	0	0	0.928571	FALSE	0	NDUFB4	164	0.773945
15086	1.21429	0.00343333	0.823529	0.881607	44	2	FALSE	NDUFA9	42.7727	44	0	0	0.928571	FALSE	0	NDUFA9	234	0.763799
16790	2.35612	0.00017541	0.424427	0.896406	44	5	FALSE	DCAF13	49.5227	44	0	0	0.773981	FALSE	0	DCAF13	434	0.301968
110	2.09545	0.00543994	0.477223	0.675526	43	4	FALSE	PRPF4	55.7442	43	0	0	0.780909	FALSE	0	PRPF4	4774	0.337844
512	2	0.00421578	0.5	0.605759	43	4	FALSE	PRPF40A	57.4419	43	0	0	0.8	FALSE	0	PRPF40A	3880	0.320904
3922	2.22662	0.00231707	0.449111	0.607973	43	4	FALSE	EIF3G	85.6512	43	0	0	0.795564	FALSE	0	EIF3G	19324	0.458028
11925	2.98305	0.00222698	0.335227	0.894795	43	7	FALSE	PSMB5	42.8837	43	0	0	0.834746	FALSE	0	PSMB5	7814	0.564259
11935	3.06215	0.00027904	0.326568	0.920266	43	7	FALSE	PSMA7	43.1163	43	0	0	0.828154	FALSE	0	PSMA7	226	0.653277
11941	3.0678	0.00255706	0.325967	0.894795	43	7	FALSE	PSMB9	42.5116	43	0	0	0.827684	FALSE	0	PSMB9	7140	0.654025
14995	1.23214	0.00202426	0.811594	0.924695	43	2	FALSE	MT-ND4	43.6512	43	0	0	0.922619	FALSE	0	MT-ND4	136	0.779485
15033	1.23214	0.0014466	0.811594	0.936877	43	2	FALSE	NDUFB7	43.7209	43	0	0	0.922619	FALSE	0	NDUFB7	120	0.780731
15055	1.23214	0.00219731	0.811594	0.918051	43	2	FALSE	NDUFB6	43.5814	43	0	0	0.922619	FALSE	0	NDUFB6	150	0.778239
16819	2.34892	0.00061072	0.425727	0.879291	43	5	FALSE	NOL6	48.6744	43	0	0	0.77518	FALSE	0	NOL6	1998	0.291464
16821	2.34892	0.00644247	0.425727	0.833887	43	5	FALSE	UTP14A	47.6047	43	0	0	0.77518	FALSE	0	UTP14A	21728	0.286635
244	2.12273	0.00303277	0.471092	0.519164	42	4	FALSE	SF1	50.3095	42	0	0	0.775455	FALSE	0	SF1	3434	0.32882
285	2.24545	0.00076741	0.445344	0.767712	42	4	FALSE	LSM6	57.1905	42	0	0	0.750909	FALSE	0	LSM6	986	0.411442
5199	2.35612	6.573e-05	0.424427	0.904762	42	5	FALSE	MRPL19	88.0952	42	0	0	0.773981	FALSE	0	MRPL19	536	0.540462
14988	1.25	0.0015317	0.8	0.940767	42	2	FALSE	NDUFB1	43.9524	42	0	0	0.916667	FALSE	0	NDUFB1	102	0.784864
15019	1.25	0.00088644	0.8	0.954704	42	2	FALSE	NDUFC1	44.1905	42	0	0	0.916667	FALSE	0	NDUFC1	80	0.789116
15083	1.25	0.00141637	0.8	0.936121	42	2	FALSE	NDUFV3	43.9048	42	0	0	0.916667	FALSE	0	NDUFV3	112	0.784014
16811	2.35252	0.00058307	0.425076	0.896632	42	5	FALSE	DIEXF	48.9048	42	0	0	0.77458	FALSE	0	DIEXF	3270	0.292843
16835	2.36691	8.493e-05	0.422492	0.944251	42	5	FALSE	DHX37	50.6905	42	0	0	0.772182	FALSE	0	DHX37	812	0.310985
188	2.27273	0.00059852	0.44	0.754878	41	4	FALSE	SNRNP40	56.0488	41	0	0	0.745455	FALSE	0	SNRNP40	746	0.418274
387	2.20909	0.00200625	0.452675	0.67439	41	4	FALSE	PRPF31	54.5366	41	0	0	0.758182	FALSE	0	PRPF31	1848	0.36849
4821	2.31295	7.456e-05	0.432348	0.915854	41	4	FALSE	MRPL33	81.7317	41	0	0	0.781175	FALSE	0	MRPL33	774	0.48362
11943	3.0791	0.00020464	0.324771	0.932927	41	7	FALSE	PSMB10	43.4634	41	0	0	0.826742	FALSE	0	PSMB10	174	0.668668
11945	3.0791	0.00019446	0.324771	0.937805	41	7	FALSE	PSMB8	43.6341	41	0	0	0.826742	FALSE	0	PSMB8	166	0.671295
11981	3.0452	0.00964061	0.328386	0.912195	41	7	FALSE	UCHL5	43.1951	41	0	0	0.829567	FALSE	0	UCHL5	38704	0.654102
14944	1.26786	0.00448637	0.788732	0.914634	41	2	FALSE	MT-ND6	43.561	41	0	0	0.910714	FALSE	0	MT-ND6	140	0.777875
15099	1.26786	0.00152133	0.788732	0.931707	41	2	FALSE	NDUFB2	43.4878	41	0	0	0.910714	FALSE	0	NDUFB2	120	0.776568
160	2.00455	0.0575473	0.498866	0.342308	40	3	FALSE	NXF1	30.4	40	0	0	0.799091	FALSE	0	NXF1	56522	0.169832
278	1.99091	0.0114338	0.502283	0.389744	40	3	FALSE	SRSF3	40.4	40	0	0	0.801818	FALSE	0	SRSF3	8386	0.221978
283	2.15909	0.00188275	0.463158	0.625641	40	4	FALSE	DHX16	54.475	40	0	0	0.768182	FALSE	0	DHX16	1804	0.356046
3545	2.36691	0.00058172	0.422492	0.876923	40	5	FALSE	DDX47	49.5	40	0	0	0.772182	FALSE	0	DDX47	2386	0.3
4173	2.26619	0.00209681	0.44127	0.573077	40	5	FALSE	EIF3E	84.25	40	0	0	0.788969	FALSE	0	EIF3E	11988	0.450535
11902	3.08475	9.176e-05	0.324176	0.958974	40	7	FALSE	ADRM1	44.2	40	0	0	0.826271	FALSE	0	ADRM1	94	0.68
11955	3.08475	0.0001312	0.324176	0.95641	40	7	FALSE	PSMA8	44.1	40	0	0	0.826271	FALSE	0	PSMA8	98	0.678462
14978	1.28571	0.00240842	0.777778	0.903846	40	2	FALSE	MT-ND1	43.5	40	0	0	0.904762	FALSE	0	MT-ND1	150	0.776786
15000	1.28571	0.00067065	0.777778	0.966667	40	2	FALSE	MT-ND2	44.65	40	0	0	0.904762	FALSE	0	MT-ND2	52	0.797321
15053	1.28571	0.00095108	0.777778	0.961538	40	2	FALSE	MT-ND3	44.6	40	0	0	0.904762	FALSE	0	MT-ND3	60	0.796429
16759	2.3777	0.00013754	0.420575	0.914103	40	5	FALSE	UTP14C	49.6	40	0	0	0.770384	FALSE	0	UTP14C	968	0.306173
16826	2.3741	0.00013292	0.421212	0.919231	40	5	FALSE	UTP3	49.575	40	0	0	0.770983	FALSE	0	UTP3	504	0.304141
148	2.06818	0.00275806	0.483516	0.576248	39	4	FALSE	SF3B4	55.2308	39	0	0	0.786364	FALSE	0	SF3B4	2892	0.324887
320	2.26364	0.00035374	0.441767	0.784076	39	4	FALSE	LSM5	57.6154	39	0	0	0.747273	FALSE	0	LSM5	488	0.417503
3513	2.3777	7.881e-05	0.420575	0.954116	39	5	FALSE	HEATR1	51.1026	39	0	0	0.770384	FALSE	0	HEATR1	354	0.313513
3543	2.36691	0.00053448	0.422492	0.825911	39	5	FALSE	UTP11L	48.7949	39	0	0	0.772182	FALSE	0	UTP11L	3952	0.293945
3914	2.24101	0.00081523	0.446228	0.780027	39	4	FALSE	EIF2S3	101.949	39	0	0	0.793165	FALSE	0	EIF2S3	12462	0.536572
4155	2.23741	0.00199763	0.446945	0.581646	39	4	FALSE	EIF3F	81.8462	39	0	0	0.793765	FALSE	0	EIF3F	10758	0.435352
11933	3.0904	7.685e-05	0.323583	0.964912	39	7	FALSE	USP14	44.4615	39	0	0	0.8258	FALSE	0	USP14	80	0.684024
15030	1.30357	0.00012137	0.767123	0.990553	39	2	FALSE	MT-ND4L	45.1026	39	0	0	0.89881	FALSE	0	MT-ND4L	14	0.805403
15051	1.30357	0.00012137	0.767123	0.990553	39	2	FALSE	MT-ND5	45.1026	39	0	0	0.89881	FALSE	0	MT-ND5	14	0.805403
15068	1.30357	0.00117502	0.767123	0.94332	39	2	FALSE	NDUFA7	44.0769	39	0	0	0.89881	FALSE	0	NDUFA7	92	0.787088
114	1.95455	0.0230545	0.511628	0.395448	38	3	FALSE	SRSF2	41.9474	38	0	0	0.809091	FALSE	0	SRSF2	12130	0.219482
5240	2.39209	3.047e-05	0.418045	0.944523	38	5	FALSE	MRPL32	84	38	0	0	0.767986	FALSE	0	MRPL32	322	0.531646
172	2.01364	0.00811729	0.496614	0.417417	37	4	FALSE	DDX5	46.2432	37	0	0	0.797273	FALSE	0	DDX5	5622	0.254084
806	2.13182	0.0139893	0.469083	0.608108	37	4	FALSE	NHP2L1	50.5405	37	0	0	0.773636	FALSE	0	NHP2L1	11078	0.319877
3535	2.38849	8.508e-05	0.418675	0.936937	37	5	FALSE	DDX49	51.2162	37	0	0	0.768585	FALSE	0	DDX49	772	0.316149
4856	2.39568	3.946e-05	0.417417	0.929429	37	5	FALSE	MRPL34	80.1081	37	0	0	0.767386	FALSE	0	MRPL34	314	0.507013
4900	2.39568	3.122e-05	0.417417	0.942943	37	5	FALSE	MRPL20	81.1892	37	0	0	0.767386	FALSE	0	MRPL20	294	0.513856
11977	3.10169	2.276e-05	0.322404	0.983483	37	7	FALSE	PSMB11	44.973	37	0	0	0.824859	FALSE	0	PSMB11	24	0.691892
14986	1.33929	0.00125027	0.746667	0.941441	37	2	FALSE	NDUFA3	44.6216	37	0	0	0.886905	FALSE	0	NDUFA3	78	0.796815
170	1.98182	0.0258625	0.504587	0.333333	36	4	FALSE	RNPS1	38.8611	36	0	0	0.803636	FALSE	0	RNPS1	17474	0.205614
350	2.21364	0.00024267	0.451745	0.820635	36	4	FALSE	CWC25	62.1667	36	0	0	0.757273	FALSE	0	CWC25	450	0.437793
3977	2.28417	0.00110977	0.437795	0.663492	36	5	FALSE	EIF5B	93.4722	36	0	0	0.785971	FALSE	0	EIF5B	8200	0.505255
4055	2.26259	0.0153823	0.441971	0.449206	36	5	FALSE	PABPC1	76.9722	36	0	0	0.789568	FALSE	0	PABPC1	47214	0.402996
4872	2.33813	4.006e-05	0.427692	0.933333	36	5	FALSE	GFM2	95.1111	36	0	0	0.776978	FALSE	0	GFM2	360	0.552972
384	2.27727	0.00139209	0.439122	0.771429	35	4	FALSE	TXNL4A	54.4857	35	0	0	0.744545	FALSE	0	TXNL4A	1008	0.391984
4818	2.34173	3.322e-05	0.427035	0.936134	35	5	FALSE	GFM1	94.6	35	0	0	0.776379	FALSE	0	GFM1	294	0.55
11973	3.11864	5.984e-05	0.320652	0.971429	35	7	FALSE	PSMD5	45.1714	35	0	0	0.823446	FALSE	0	PSMD5	60	0.705804
12120	3	0.00823721	0.333333	0.894118	35	7	FALSE	SHFM1	43.8857	35	0	0	0.833333	FALSE	0	SHFM1	8464	0.548214
12430	3.10734	2.147e-05	0.321818	0.986555	35	7	FALSE	PSMA2	45.2571	35	0	0	0.824388	FALSE	0	PSMA2	26	0.685714
15036	1.375	0.00181967	0.727273	0.910924	35	2	FALSE	NDUFS6	43.7429	35	0	0	0.875	FALSE	0	NDUFS6	116	0.781122
140	2.13182	0.00071095	0.469083	0.823529	34	4	FALSE	PHF5A	64.1765	34	0	0	0.773636	FALSE	0	PHF5A	996	0.398612
298	2.19091	0.00029111	0.456432	0.83066	34	4	FALSE	CWC22	63.1471	34	0	0	0.761818	FALSE	0	CWC22	550	0.426669
355	2.15909	0.0022945	0.463158	0.789661	34	4	FALSE	SF3B5	63.0294	34	0	0	0.768182	FALSE	0	SF3B5	2100	0.393934
1484	2.19091	0.0774719	0.456432	0.349376	34	4	FALSE	RANBP2	24.3235	34	0	0	0.761818	FALSE	0	RANBP2	70046	0.168709
16800	2.69065	0.00082606	0.371658	0.796791	34	5	FALSE	NOB1	43.6176	34	0	0	0.718225	FALSE	0	NOB1	8066	0.479315
226	2.26818	0.00040692	0.440882	0.795455	33	4	FALSE	BCAS2	61.0303	33	0	0	0.746364	FALSE	0	BCAS2	654	0.435931
380	2.18182	0.00213854	0.458333	0.691288	33	4	FALSE	USP39	52.8788	33	0	0	0.763636	FALSE	0	USP39	2468	0.350191
11921	3.12994	5.04e-06	0.319495	0.994318	33	7	FALSE	PSME4	45.303	33	0	0	0.822505	FALSE	0	PSME4	6	0.70786
16774	2.43165	1.791e-05	0.411243	0.982955	33	5	FALSE	UTP20	52.4242	33	0	0	0.761391	FALSE	0	UTP20	124	0.336053
84	2.14091	0.00202754	0.467091	0.483871	32	4	FALSE	DHX9	50.8438	32	0	0	0.771818	FALSE	0	DHX9	1666	0.31385
3934	2.34173	0.00127863	0.427035	0.604839	32	5	FALSE	EIF2S2	75.8438	32	0	0	0.776379	FALSE	0	EIF2S2	14058	0.426088
180	2.26818	0.00109737	0.440882	0.851613	31	4	FALSE	AQR	62.9677	31	0	0	0.746364	FALSE	0	AQR	786	0.44658
923	2.22273	0.00233559	0.449898	0.503226	31	4	FALSE	HNRNPH1	41.3871	31	0	0	0.755455	FALSE	0	HNRNPH1	2298	0.281545
3938	2.35971	0.00083154	0.42378	0.56129	31	5	FALSE	EIF3C	66.7097	31	0	0	0.773381	FALSE	0	EIF3C	7452	0.383389
4559	2.29856	0.0121533	0.435055	0.660215	31	4	FALSE	ETF1	98.5484	31	0	0	0.783573	FALSE	0	ETF1	61314	0.538516
15295	1.44643	0.00067326	0.691358	0.948387	31	2	FALSE	NDUFA4	44.8065	31	0	0	0.85119	FALSE	0	NDUFA4	56	0.800115
79	2.45909	0.0215145	0.406654	0.494253	30	4	FALSE	NUP153	19.0667	30	0	0	0.708182	FALSE	0	NUP153	18070	0.194558
152	2.13636	0.0180078	0.468085	0.365517	30	3	FALSE	DDX39B	30.4667	30	0	0	0.772727	FALSE	0	DDX39B	22640	0.190417
372	2.25455	0.00274551	0.443548	0.48046	30	4	FALSE	HNRNPK	39.0333	30	0	0	0.749091	FALSE	0	HNRNPK	1618	0.274883
12010	3.36158	0.0550813	0.297479	0.432184	30	8	FALSE	CDC20	16.5667	30	0	0	0.803202	FALSE	0	CDC20	29244	0.258854
14528	1.74699	0.269644	0.572414	0.273563	30	4	FALSE	EPS15	12.7	30	0	0	0.875502	FALSE	0	EPS15	8336	0.171171
357	2.19545	0.00044126	0.455487	0.73399	29	4	FALSE	TFIP11	61.6897	29	0	0	0.760909	FALSE	0	TFIP11	794	0.405853
5886	2.11871	0.00031122	0.471986	0.802956	29	4	FALSE	RSL24D1	109.724	29	0	0	0.813549	FALSE	0	RSL24D1	1522	0.492036
18065	3.86441	0.0319102	0.258772	0.578818	29	9	FALSE	H2AFZ	21.1724	29	0	0	0.761299	FALSE	0	H2AFZ	96534	0.398829
489	2.34091	0.00090295	0.427184	0.843915	28	4	FALSE	NAA38	53.8571	28	0	0	0.731818	FALSE	0	NAA38	404	0.410851
3940	2.36331	0.00095213	0.423135	0.616402	28	5	FALSE	EIF5	64.6429	28	0	0	0.772782	FALSE	0	EIF5	9342	0.365214
14954	1.5	0.00545001	0.666667	0.767196	28	2	FALSE	TIMMDC1	39.9286	28	0	0	0.833333	FALSE	0	TIMMDC1	184	0.71301
15289	1.51786	0.00329334	0.658824	0.888889	28	3	FALSE	NDUFB3	42.6786	28	0	0	0.827381	FALSE	0	NDUFB3	90	0.775974
18055	3.89831	0.0106932	0.256522	0.621693	28	9	FALSE	H2AFV	21.8214	28	0	0	0.758475	FALSE	0	H2AFV	73900	0.419643
18057	3.89831	0.00594327	0.256522	0.674603	28	9	FALSE	HIST1H2BJ	21.7143	28	0	0	0.758475	FALSE	0	HIST1H2BJ	66130	0.434286
219	2.34545	0.00031191	0.426357	0.905983	27	4	FALSE	PPIL1	63.9259	27	0	0	0.730909	FALSE	0	PPIL1	380	0.477059
249	2.28636	0.00052713	0.437376	0.789174	27	4	FALSE	MFAP1	63.3704	27	0	0	0.742727	FALSE	0	MFAP1	578	0.437037
662	2.35	0.00021981	0.425532	0.911681	27	4	FALSE	LSM7	56.9259	27	0	0	0.73	FALSE	0	LSM7	248	0.434549
16383	4.69444	0.11884	0.213018	0.22792	27	9	FALSE	PLG	9.11111	27	0	0	0.69213	FALSE	0	PLG	117080	0.162037
16776	2.64748	4.723e-05	0.377717	0.925926	27	5	FALSE	LTV1	47.8148	27	0	0	0.72542	FALSE	0	LTV1	322	0.459758
16840	2.81295	0.0007716	0.355499	0.840456	27	5	FALSE	RIOK2	44.8889	27	0	0	0.697842	FALSE	0	RIOK2	5760	0.582973
17964	3.88701	0.0609888	0.257267	0.418803	27	9	FALSE	KAT5	18.0741	27	0	0	0.759416	FALSE	0	KAT5	119488	0.34102
18061	3.9661	0.00505587	0.252137	0.735043	27	9	FALSE	HIST2H3A	21.6667	27	0	0	0.752825	FALSE	0	HIST2H3A	65672	0.555556
18079	3.90395	0.00570833	0.256151	0.689459	27	9	FALSE	HIST1H2BM	21.6296	27	0	0	0.758004	FALSE	0	HIST1H2BM	65986	0.432593
75	2.67727	0.0104209	0.373514	0.618462	26	4	FALSE	NUP107	19.4615	26	0	0	0.664545	FALSE	0	NUP107	9156	0.294872
102	2.33182	0.0203265	0.42885	0.593846	26	4	FALSE	NUP155	23.9615	26	0	0	0.733636	FALSE	0	NUP155	14364	0.188674
1125	2.35	3.234e-05	0.425532	0.950769	26	4	FALSE	LSM4	58.3462	26	0	0	0.73	FALSE	0	LSM4	56	0.442016
3693	2.34532	6.685e-05	0.42638	0.889231	26	5	FALSE	EEF1G	114.885	26	0	0	0.775779	FALSE	0	EEF1G	140	0.645419
4141	2.34173	0.00069885	0.427035	0.624615	26	5	FALSE	EIF3D	72.9231	26	0	0	0.776379	FALSE	0	EIF3D	5382	0.405128
4178	2.31295	0.00087063	0.432348	0.556923	26	5	FALSE	EIF3H	62.0385	26	0	0	0.781175	FALSE	0	EIF3H	5224	0.331756
4673	2.31295	2.2e-07	0.432348	0.996923	26	4	FALSE	TPT1	121.115	26	0	0	0.781175	FALSE	0	TPT1	2	0.661833
13405	3.00613	0.505271	0.332653	0.153846	26	7	FALSE	DYNC1H1	9.5	26	0	0	0.832822	FALSE	0	DYNC1H1	182016	0.134615
14626	1.93976	0.145985	0.515528	0.326154	26	3	FALSE	CLTC	13.0385	26	0	0	0.843373	FALSE	0	CLTC	5288	0.213115
14948	1.53571	0.00950877	0.651163	0.667692	26	2	FALSE	NDUFAF1	36.6154	26	0	0	0.821429	FALSE	0	NDUFAF1	248	0.653846
16377	4.69841	0.117904	0.212838	0.227692	26	9	FALSE	ALB	9.03846	26	0	0	0.691799	FALSE	0	ALB	102078	0.160714
176	2.53636	0.00555249	0.394265	0.67	25	4	FALSE	NUP93	22.52	25	0	0	0.692727	FALSE	0	NUP93	6140	0.264941
902	2.25909	0.00106485	0.442656	0.533333	25	4	FALSE	HNRNPF	41.2	25	0	0	0.748182	FALSE	0	HNRNPF	1056	0.294286
1178	2.55455	0.00841174	0.391459	0.58	25	4	FALSE	NUP62	21.12	25	0	0	0.689091	FALSE	0	NUP62	6680	0.242759
3916	2.30935	0.00257028	0.433022	0.596667	25	5	FALSE	EIF4A1	71.8	25	0	0	0.781775	FALSE	0	EIF4A1	12672	0.377895
11413	4.02778	0.0331741	0.248276	0.406667	25	8	FALSE	CXCL12	12.44	25	0	0	0.747685	FALSE	0	CXCL12	50866	0.303415
11432	3.56349	0.383474	0.280624	0.406667	25	7	FALSE	CCL5	12.6	25	0	0	0.786376	FALSE	0	CCL5	219964	0.299048
12045	3.11299	0.0760154	0.321234	0.29	25	8	FALSE	SKP1	15.8	25	0	0	0.823917	FALSE	0	SKP1	294646	0.154902
14218	2.37255	0.230244	0.421488	0.59	25	6	FALSE	IRF7	16.12	25	0	0	0.828431	FALSE	0	IRF7	2684	0.536
18115	3.89831	0.0378977	0.256522	0.52	25	9	FALSE	HDAC1	20.52	25	0	0	0.758475	FALSE	0	HDAC1	52732	0.408
73	2.68636	0.00442667	0.37225	0.684783	24	4	FALSE	NUP133	20.5833	24	0	0	0.662727	FALSE	0	NUP133	7506	0.311869
77	2.68636	0.00433389	0.37225	0.612319	24	4	FALSE	KPNB1	19.5417	24	0	0	0.662727	FALSE	0	KPNB1	4680	0.296086
116	2.1	0.00354673	0.47619	0.405797	24	3	FALSE	RBM8A	41	24	0	0	0.78	FALSE	0	RBM8A	3930	0.235632
306	2.26818	0.00119452	0.440882	0.702899	24	4	FALSE	SLU7	56.5417	24	0	0	0.746364	FALSE	0	SLU7	1138	0.401005
3529	2.72302	0.0280828	0.367239	0.586957	24	5	FALSE	TEX10	38.9167	24	0	0	0.71283	FALSE	0	TEX10	78408	0.452035
3568	2.46763	0.00655669	0.405248	0.532609	24	5	FALSE	EXOSC2	37.25	24	0	0	0.755396	FALSE	0	EXOSC2	27534	0.240323
4145	2.14748	0.00373657	0.465662	0.655797	24	4	FALSE	EIF3M	75.625	24	0	0	0.808753	FALSE	0	EIF3M	7756	0.340653
11471	4.03571	0.0252175	0.247788	0.48913	24	8	FALSE	CXCL10	13.5417	24	0	0	0.747024	FALSE	0	CXCL10	54808	0.338542
11998	3.20339	0.0378293	0.312169	0.347826	24	8	FALSE	RBX1	20.4167	24	0	0	0.816384	FALSE	0	RBX1	207318	0.214912
12018	3.32203	0.0201327	0.30102	0.532609	24	8	FALSE	ANAPC2	26.2917	24	0	0	0.806497	FALSE	0	ANAPC2	9954	0.302203
12426	3.25424	1.273e-05	0.307292	0.981884	24	7	FALSE	PSME2	44.7917	24	0	0	0.812147	FALSE	0	PSME2	10	0.759181
14214	2.66667	0.0571977	0.375	0.65942	24	7	FALSE	ISG15	17	24	0	0	0.791667	FALSE	0	ISG15	878	0.529948
14224	2.66667	0.0237268	0.375	0.67029	24	7	FALSE	MX1	17.1667	24	0	0	0.791667	FALSE	0	MX1	600	0.520202
14530	2.0241	0.112036	0.494048	0.336957	24	3	FALSE	AP2B1	12.7917	24	0	0	0.829317	FALSE	0	AP2B1	3704	0.224415
16126	3.41718	0.231827	0.292639	0.217391	24	8	FALSE	TUBG1	9.875	24	0	0	0.798569	FALSE	0	TUBG1	60216	0.152995
17996	3.91525	0.0303728	0.255411	0.384058	24	9	FALSE	VPS72	19	24	0	0	0.757062	FALSE	0	VPS72	118650	0.372549
18067	3.94915	0.00519517	0.253219	0.684783	24	9	FALSE	HIST1H2BK	21.8333	24	0	0	0.754237	FALSE	0	HIST1H2BK	65752	0.485185
18069	3.9209	0.00554673	0.255043	0.673913	24	9	FALSE	HIST2H2BE	21.9583	24	0	0	0.756591	FALSE	0	HIST2H2BE	65894	0.439167
18071	3.9209	0.00553275	0.255043	0.666667	24	9	FALSE	HIST1H2BB	21.9583	24	0	0	0.756591	FALSE	0	HIST1H2BB	65886	0.439167
104	2.1	0.00825379	0.47619	0.41502	23	3	FALSE	MAGOH	43.6957	23	0	0	0.78	FALSE	0	MAGOH	6814	0.250875
878	2.2	0.00039982	0.454545	0.73913	23	4	FALSE	DDX46	60	23	0	0	0.76	FALSE	0	DDX46	458	0.382166
926	2.28636	0.00121735	0.437376	0.577075	23	4	FALSE	HNRNPH2	44.913	23	0	0	0.742727	FALSE	0	HNRNPH2	1482	0.318532
1706	2.69091	0.00108143	0.371622	0.766798	23	4	FALSE	NUP205	21.6957	23	0	0	0.661818	FALSE	0	NUP205	1654	0.328722
3586	2.66547	2.653e-05	0.375169	0.924901	23	5	FALSE	FCF1	48.6522	23	0	0	0.722422	FALSE	0	FCF1	112	0.491436
3928	2.54676	0.00228454	0.392655	0.525692	23	5	FALSE	EIF4G1	32.2174	23	0	0	0.742206	FALSE	0	EIF4G1	3620	0.210571
3932	2.32734	0.00165472	0.429675	0.608696	23	5	FALSE	EIF4A2	59.1304	23	0	0	0.778777	FALSE	0	EIF4A2	8976	0.316206
11411	4.03968	0.028692	0.247544	0.454545	23	8	FALSE	CXCL11	13.1304	23	0	0	0.746693	FALSE	0	CXCL11	55842	0.328261
11963	3.18644	1.949e-05	0.31383	0.980237	23	7	FALSE	PSMD10	44.8696	23	0	0	0.817797	FALSE	0	PSMD10	16	0.701087
12000	3.43503	0.00374666	0.291118	0.632411	23	8	FALSE	CDC16	19.1304	23	0	0	0.797081	FALSE	0	CDC16	3374	0.318841
12006	3.42373	0.00505184	0.292079	0.608696	23	8	FALSE	CDC27	18.6522	23	0	0	0.798023	FALSE	0	CDC27	1910	0.305773
12445	3.24294	1.306e-05	0.308362	0.98419	23	7	FALSE	PSME1	44.913	23	0	0	0.813089	FALSE	0	PSME1	14	0.748551
13431	4.44172	0.0756605	0.225138	0.3083	23	9	FALSE	COPB1	11.0435	23	0	0	0.71319	FALSE	0	COPB1	32050	0.25
16763	2.43885	6.67e-05	0.410029	0.924901	23	5	FALSE	NIFK	53.4348	23	0	0	0.760192	FALSE	0	NIFK	256	0.329844
16833	2.44604	0.00011955	0.408824	0.849802	23	5	FALSE	RRP36	49.6957	23	0	0	0.758993	FALSE	0	RRP36	866	0.310598
18011	3.22599	0.230569	0.309982	0.509881	23	8	FALSE	HIST2H2AC	21.9565	23	0	0	0.814501	FALSE	0	HIST2H2AC	836680	0.383677
18059	3.9887	0.0050074	0.250708	0.6917	23	9	FALSE	HIST1H2BN	21.7391	23	0	0	0.750942	FALSE	0	HIST1H2BN	65642	0.557414
18063	3.9887	0.0050074	0.250708	0.6917	23	9	FALSE	HIST3H2BB	21.7391	23	0	0	0.750942	FALSE	0	HIST3H2BB	65642	0.557414
18075	3.9887	0.0050074	0.250708	0.6917	23	9	FALSE	HIST1H2BL	21.7391	23	0	0	0.750942	FALSE	0	HIST1H2BL	65642	0.557414
18077	3.9887	0.0050008	0.250708	0.699605	23	9	FALSE	HIST1H2BD	21.7826	23	0	0	0.750942	FALSE	0	HIST1H2BD	65638	0.558528
18081	3.9887	0.0050008	0.250708	0.699605	23	9	FALSE	HIST1H2BO	21.7826	23	0	0	0.750942	FALSE	0	HIST1H2BO	65638	0.558528
96	2.46818	0.0100201	0.405157	0.441558	22	4	FALSE	RAE1	22.8636	22	0	0	0.706364	FALSE	0	RAE1	7476	0.224153
146	2.17727	0.0008542	0.45929	0.532468	22	4	FALSE	SRSF7	50.8636	22	0	0	0.764545	FALSE	0	SRSF7	818	0.310144
1210	2.27727	0.00082024	0.439122	0.601732	22	4	FALSE	PTBP1	41.4091	22	0	0	0.744545	FALSE	0	PTBP1	802	0.289574
1708	2.69545	0.00254134	0.370995	0.774892	22	4	FALSE	NUP85	21.9545	22	0	0	0.660909	FALSE	0	NUP85	5188	0.332645
1722	2.81818	0.00132689	0.354839	0.757576	22	4	FALSE	NUP160	20.2273	22	0	0	0.636364	FALSE	0	NUP160	2710	0.412801
11992	3.42938	0.0221825	0.291598	0.506494	22	8	FALSE	ANAPC16	30.5455	22	0	0	0.797552	FALSE	0	ANAPC16	11798	0.396694
12004	2.93785	0.0564831	0.340385	0.65368	22	7	FALSE	CDC23	20.8182	22	0	0	0.838512	FALSE	0	CDC23	50452	0.223851
13958	4.3254	0.0914238	0.231193	0.264069	22	8	FALSE	NPS	9.04545	22	0	0	0.722884	FALSE	0	NPS	73848	0.164463
14258	2.70588	0.0140311	0.369565	0.727273	22	7	FALSE	IFIT2	17.9545	22	0	0	0.786765	FALSE	0	IFIT2	268	0.544077
14518	2.07229	0.0384135	0.482558	0.450216	22	4	FALSE	GAK	14.7273	22	0	0	0.821285	FALSE	0	GAK	1774	0.262987
14942	1.60714	0.00349341	0.622222	0.761905	22	2	FALSE	ECSIT	39.0455	22	0	0	0.797619	FALSE	0	ECSIT	118	0.69724
14964	1.60714	0.00536966	0.622222	0.683983	22	2	FALSE	NDUFAF4	36.7727	22	0	0	0.797619	FALSE	0	NDUFAF4	162	0.656656
15305	1.625	0.00021067	0.615385	0.961039	22	3	FALSE	NDUFA10	43.9545	22	0	0	0.791667	FALSE	0	NDUFA10	20	0.799174
16891	2.45683	1.83e-05	0.407028	0.930736	22	5	FALSE	RRP7A	54.1818	22	0	0	0.757194	FALSE	0	RRP7A	32	0.342923
18073	3.99435	0.0050008	0.250354	0.670996	22	9	FALSE	HIST1H2BH	21.6818	22	0	0	0.750471	FALSE	0	HIST1H2BH	65638	0.555944
98	2.06818	0.0045661	0.483516	0.447619	21	3	FALSE	SRRM1	47.619	21	0	0	0.786364	FALSE	0	SRRM1	4254	0.258799
959	2.27273	0.00043434	0.44	0.614286	21	4	FALSE	HNRNPR	53.0476	21	0	0	0.745455	FALSE	0	HNRNPR	670	0.365846
2071	2.85455	0.00380066	0.350318	0.7	21	4	FALSE	NUP35	19.381	21	0	0	0.629091	FALSE	0	NUP35	4254	0.40377
4169	2.39568	0.00038407	0.417417	0.685714	21	5	FALSE	EIF3L	63.7619	21	0	0	0.767386	FALSE	0	EIF3L	3064	0.364354
4560	2.39568	0.00558908	0.417417	0.6	21	5	FALSE	GSPT1	88.9048	21	0	0	0.767386	FALSE	0	GSPT1	31564	0.519911
11996	3.38983	0.00544135	0.295	0.685714	21	8	FALSE	ANAPC4	20.1905	21	0	0	0.800847	FALSE	0	ANAPC4	1952	0.265038
12022	2.9209	0.0816506	0.34236	0.385714	21	7	FALSE	CCNA2	17.9524	21	0	0	0.839925	FALSE	0	CCNA2	105374	0.188972
12042	3.11864	0.0851385	0.320652	0.328571	21	8	FALSE	CUL1	18.381	21	0	0	0.823446	FALSE	0	CUL1	427158	0.175057
12506	3.20339	6.54e-06	0.312169	0.990476	21	7	FALSE	PSMD9	45.1905	21	0	0	0.816384	FALSE	0	PSMD9	6	0.717309
13439	4.47239	0.0476358	0.223594	0.4	21	9	FALSE	COPG1	11.4762	21	0	0	0.710634	FALSE	0	COPG1	29844	0.273243
14222	2.72549	0.00877229	0.366906	0.790476	21	7	FALSE	RSAD2	18.6667	21	0	0	0.784314	FALSE	0	RSAD2	218	0.565657
14228	2.80392	0.00360306	0.356643	0.804762	21	7	FALSE	IFIT1	18.5714	21	0	0	0.77451	FALSE	0	IFIT1	96	0.619048
14252	2.72549	0.0239582	0.366906	0.733333	21	7	FALSE	IRF9	18.0952	21	0	0	0.784314	FALSE	0	IRF9	460	0.548341
18013	3.23729	0.194743	0.308901	0.52381	21	8	FALSE	HIST2H2AA3	22.381	21	0	0	0.813559	FALSE	0	HIST2H2AA3	778230	0.390977
18095	4.68362	0.0003032	0.21351	0.780952	21	10	FALSE	HIST1H2AD	23.0476	21	0	0	0.693032	FALSE	0	HIST1H2AD	200	0.57619
857	2.22273	0.00012669	0.449898	0.789474	20	4	FALSE	DDX42	62.05	20	0	0	0.755455	FALSE	0	DDX42	228	0.400323
1093	2.24091	0.00049823	0.446247	0.584211	20	4	FALSE	HNRNPU	50.65	20	0	0	0.751818	FALSE	0	HNRNPU	530	0.328896
4592	2.3777	0.00244001	0.420575	0.689474	20	5	FALSE	GSPT2	100.1	20	0	0	0.770384	FALSE	0	GSPT2	14820	0.565537
7443	2.3777	0.0208548	0.420575	0.6	20	5	FALSE	SRP54	88.9	20	0	0	0.770384	FALSE	0	SRP54	64750	0.51092
11485	4.05159	0.0235857	0.246817	0.515789	20	8	FALSE	CXCL9	13.95	20	0	0	0.745701	FALSE	0	CXCL9	47142	0.34875
11703	5.21032	0.0205347	0.191927	0.3	20	10	FALSE	GNB2	10.15	20	0	0	0.64914	FALSE	0	GNB2	64660	0.287143
11705	5.21032	0.0205347	0.191927	0.3	20	10	FALSE	GNB3	10.15	20	0	0	0.64914	FALSE	0	GNB3	64660	0.287143
11713	5.21032	0.0205347	0.191927	0.3	20	10	FALSE	GNB4	10.15	20	0	0	0.64914	FALSE	0	GNB4	64660	0.287143
12014	3.54802	0.00141496	0.281847	0.736842	20	8	FALSE	BUB1B	18.8	20	0	0	0.787665	FALSE	0	BUB1B	564	0.348148
12016	3.58192	0.00247025	0.27918	0.615789	20	8	FALSE	MAD2L1	17.5	20	0	0	0.78484	FALSE	0	MAD2L1	576	0.364583
12020	3.55367	0.0024382	0.281399	0.642105	20	8	FALSE	UBE2C	18.35	20	0	0	0.787194	FALSE	0	UBE2C	3358	0.352885
13437	4.47853	0.046829	0.223288	0.405263	20	9	FALSE	COPG2	11.65	20	0	0	0.710123	FALSE	0	COPG2	29758	0.277381
14230	2.82353	0.00575431	0.354167	0.821053	20	7	FALSE	IFITM1	18.75	20	0	0	0.772059	FALSE	0	IFITM1	228	0.625
14238	2.82353	0.00575431	0.354167	0.821053	20	7	FALSE	IFI35	18.75	20	0	0	0.772059	FALSE	0	IFI35	228	0.625
14313	2.7451	0.0121666	0.364286	0.8	20	7	FALSE	IFIT3	18.8	20	0	0	0.781863	FALSE	0	IFIT3	394	0.569697
14667	2.04819	0.0548773	0.488235	0.405263	20	4	FALSE	PICALM	14.1	20	0	0	0.825301	FALSE	0	PICALM	1930	0.238136
18102	4.68927	0.0002774	0.213253	0.784211	20	10	FALSE	HIST1H2AC	23.3	20	0	0	0.692561	FALSE	0	HIST1H2AC	190	0.5825
178	2.4	0.00507677	0.416667	0.502924	19	4	FALSE	THOC2	22.7368	19	0	0	0.72	FALSE	0	THOC2	7220	0.191066
978	2.43182	0.0137031	0.411215	0.526316	19	5	FALSE	POLR2B	27.2105	19	0	0	0.713636	FALSE	0	POLR2B	8480	0.201559
1702	2.76818	0.00082321	0.361248	0.766082	19	4	FALSE	NUP214	22.4737	19	0	0	0.646364	FALSE	0	NUP214	826	0.345749
3615	2.41007	0.00249687	0.414925	0.590643	19	5	FALSE	SEC61G	81.4211	19	0	0	0.764988	FALSE	0	SEC61G	10406	0.484649
4009	2.52878	0.00020163	0.395448	0.608187	19	5	FALSE	EIF4B	47	19	0	0	0.745204	FALSE	0	EIF4B	286	0.295597
11983	3.48588	0.00118525	0.286872	0.80117	19	8	FALSE	ANAPC1	20.1579	19	0	0	0.792844	FALSE	0	ANAPC1	710	0.34755
11984	3.48588	0.0010702	0.286872	0.80117	19	8	FALSE	ANAPC10	20.6316	19	0	0	0.792844	FALSE	0	ANAPC10	652	0.355717
11986	3.46893	0.0145531	0.288274	0.409357	19	8	FALSE	CDK2	14.8421	19	0	0	0.794256	FALSE	0	CDK2	21228	0.296842
12008	3.42938	0.00930698	0.291598	0.602339	19	8	FALSE	ANAPC11	19.7368	19	0	0	0.797552	FALSE	0	ANAPC11	11132	0.328947
12461	3.27684	0	0.305172	1	19	7	FALSE	PSME3	46	19	0	0	0.810264	FALSE	0	PSME3	0	0.766667
13443	5.10429	0.0152107	0.195913	0.350877	19	10	FALSE	ARF1	12.2632	19	0	0	0.657975	FALSE	0	ARF1	2312	0.260918
13521	4.59509	0.0391105	0.217623	0.438596	19	9	FALSE	STX5	11.3158	19	0	0	0.700409	FALSE	0	STX5	16254	0.275995
13916	4.57143	0.228715	0.21875	0.0116959	19	9	FALSE	GNAQ	2.26316	19	0	0	0.702381	FALSE	0	GNAQ	242356	0.0982456
14226	2.84314	0.00452167	0.351724	0.783626	19	7	FALSE	OAS1	18.6316	19	0	0	0.769608	FALSE	0	OAS1	98	0.621053
14236	2.84314	0.0147144	0.351724	0.707602	19	7	FALSE	OAS2	18	19	0	0	0.769608	FALSE	0	OAS2	224	0.6
14524	2.10843	0.0411217	0.474286	0.45614	19	4	FALSE	SYNJ1	15.0526	19	0	0	0.815261	FALSE	0	SYNJ1	1548	0.272727
14534	2.16867	0.0265983	0.461111	0.426901	19	4	FALSE	AP2A1	14.3684	19	0	0	0.805221	FALSE	0	AP2A1	1190	0.281734
14950	1.66071	0.00323286	0.602151	0.74269	19	2	FALSE	NDUFAF3	37.3684	19	0	0	0.779762	FALSE	0	NDUFAF3	96	0.667293
18083	3.94915	0.00535968	0.253219	0.532164	19	9	FALSE	HIST1H2BA	21.6316	19	0	0	0.754237	FALSE	0	HIST1H2BA	65786	0.432632
18085	4.02825	0.00081779	0.248247	0.836257	19	9	FALSE	H2AFJ	23.6842	19	0	0	0.747646	FALSE	0	H2AFJ	10964	0.657895
18092	4.69492	0.00024904	0.212996	0.783626	19	10	FALSE	HIST1H2AJ	23.7368	19	0	0	0.69209	FALSE	0	HIST1H2AJ	176	0.593421
18117	4.63277	0.00116443	0.215854	0.71345	19	10	FALSE	H2AFX	24.0526	19	0	0	0.697269	FALSE	0	H2AFX	456	0.47162
130	2.26364	0.00384806	0.441767	0.431373	18	4	FALSE	DDX39A	30.9444	18	0	0	0.747273	FALSE	0	DDX39A	5640	0.209084
690	2.37273	0.0134181	0.421456	0.542484	18	4	FALSE	POLR2A	22.2222	18	0	0	0.725455	FALSE	0	POLR2A	7290	0.16299
1712	2.41364	0.0219307	0.414313	0.771242	18	4	FALSE	NUP37	24.6111	18	0	0	0.717273	FALSE	0	NUP37	10886	0.213527
1730	2.83636	9.137e-05	0.352564	0.895425	18	4	FALSE	NUP50	22.3333	18	0	0	0.632727	FALSE	0	NUP50	150	0.455782
3894	2.39568	2.18e-06	0.417417	0.954248	18	5	FALSE	EFTUD1	123.778	18	0	0	0.767386	FALSE	0	EFTUD1	14	0.711367
3930	2.76259	0.00012611	0.361979	0.712418	18	5	FALSE	EIF3J	33.5	18	0	0	0.706235	FALSE	0	EIF3J	256	0.331683
11415	4.27381	0.00402836	0.233983	0.555556	18	8	FALSE	IL8	14.7778	18	0	0	0.727183	FALSE	0	IL8	4334	0.410494
11466	4.7381	0.0883007	0.211055	0.372549	18	9	FALSE	GNAI3	10.8333	18	0	0	0.688492	FALSE	0	GNAI3	123988	0.291291
11988	3.56497	0.00047685	0.280507	0.862745	18	8	FALSE	ANAPC5	20.2778	18	0	0	0.786252	FALSE	0	ANAPC5	338	0.375514
14216	2.86275	0.00127944	0.349315	0.888889	18	7	FALSE	MX2	19.7222	18	0	0	0.767157	FALSE	0	MX2	42	0.657407
14220	2.88235	0.00440042	0.346939	0.849673	18	7	FALSE	IFI6	18.9444	18	0	0	0.764706	FALSE	0	IFI6	194	0.653257
14324	2.78431	0.0448788	0.359155	0.738562	18	7	FALSE	STAT2	18.2778	18	0	0	0.776961	FALSE	0	STAT2	518	0.569444
14329	2.78431	0.00652173	0.359155	0.816993	18	7	FALSE	ISG20	19.1111	18	0	0	0.776961	FALSE	0	ISG20	162	0.579125
17970	4.64972	0.00307479	0.215067	0.588235	18	10	FALSE	TRRAP	15.9444	18	0	0	0.695857	FALSE	0	TRRAP	878	0.325397
118	2.35	0.00755469	0.425532	0.691176	17	4	FALSE	TPR	28.9412	17	0	0	0.73	FALSE	0	TPR	6700	0.217603
575	2.29545	0.00382999	0.435644	0.419118	17	4	FALSE	POLDIP3	31.5294	17	0	0	0.740909	FALSE	0	POLDIP3	3862	0.223613
932	2.4	0.00022139	0.416667	0.713235	17	4	FALSE	HNRNPA0	37.4118	17	0	0	0.72	FALSE	0	HNRNPA0	186	0.301708
984	2.35909	0.00071523	0.423892	0.477941	17	4	FALSE	RBMX	42.6471	17	0	0	0.728182	FALSE	0	RBMX	464	0.325101
1223	2.32273	0.0004897	0.430528	0.661765	17	4	FALSE	SRSF10	60.8235	17	0	0	0.735455	FALSE	0	SRSF10	562	0.446799
1248	2.56818	0.00630515	0.389381	0.647059	17	4	FALSE	POLR2J	25.9412	17	0	0	0.686364	FALSE	0	POLR2J	5324	0.256843
1716	2.87273	0.00016718	0.348101	0.897059	17	4	FALSE	NUP210	22.4118	17	0	0	0.625455	FALSE	0	NUP210	270	0.466912
3572	2.85252	0.00159764	0.350567	0.536765	17	5	FALSE	EXOSC10	27.4706	17	0	0	0.691247	FALSE	0	EXOSC10	3800	0.343382
3936	2.57194	0.00030871	0.388811	0.698529	17	5	FALSE	EIF4E	38.2353	17	0	0	0.73801	FALSE	0	EIF4E	1142	0.251548
4180	2.44964	0.00015991	0.408223	0.720588	17	5	FALSE	EIF3K	53	17	0	0	0.758393	FALSE	0	EIF3K	1226	0.317365
11430	3.6627	0.470441	0.273023	0.169118	17	7	FALSE	KNG1	8.70588	17	0	0	0.778108	FALSE	0	KNG1	303716	0.127305
11475	4.28968	0.00255528	0.233117	0.639706	17	8	FALSE	CCL20	15.2941	17	0	0	0.72586	FALSE	0	CCL20	3826	0.436975
13391	3.53374	0.0985171	0.282986	0.279412	17	8	FALSE	ACTR1A	10.2353	17	0	0	0.788855	FALSE	0	ACTR1A	31098	0.206483
13533	5.12883	0.0112526	0.194976	0.426471	17	10	FALSE	COG3	13.4706	17	0	0	0.65593	FALSE	0	COG3	7688	0.292839
14526	2.12048	0.0427234	0.471591	0.485294	17	4	FALSE	SNAP91	15.1765	17	0	0	0.813253	FALSE	0	SNAP91	1482	0.266254
14545	2.27711	0.112602	0.439153	0.191176	17	5	FALSE	WASL	9.70588	17	0	0	0.787149	FALSE	0	WASL	4166	0.203325
16087	4.57669	0.0358933	0.218499	0.264706	17	10	FALSE	CEP290	7.88235	17	0	0	0.701943	FALSE	0	CEP290	4796	0.218954
16429	4.77381	0.0549735	0.209476	0.352941	17	9	FALSE	VEGFA	10	17	0	0	0.685516	FALSE	0	VEGFA	40034	0.210263
17963	4.72316	0.001522	0.211722	0.647059	17	10	FALSE	ACTL6A	14.0588	17	0	0	0.689736	FALSE	0	ACTL6A	294	0.360483
17984	4.64407	0.0133373	0.215328	0.470588	17	10	FALSE	RUVBL1	16.7647	17	0	0	0.696328	FALSE	0	RUVBL1	44914	0.32872
18131	4.68927	0.00024248	0.213253	0.727941	17	10	FALSE	HIST1H2AA	24.4706	17	0	0	0.692561	FALSE	0	HIST1H2AA	168	0.569083
1233	2.48182	0.00884779	0.40293	0.675	16	4	FALSE	GTF2F1	23.1875	16	0	0	0.703636	FALSE	0	GTF2F1	4864	0.205199
1252	2.59545	0.00512921	0.385289	0.708333	16	4	FALSE	POLR2L	25.5	16	0	0	0.680909	FALSE	0	POLR2L	4640	0.260204
1725	2.78182	0.00178324	0.359477	0.85	16	4	FALSE	NUP54	24.125	16	0	0	0.643636	FALSE	0	NUP54	3964	0.371154
3913	2.94604	8.097e-05	0.339438	0.75	16	5	FALSE	EIF1	33.9375	16	0	0	0.675659	FALSE	0	EIF1	114	0.361037
11508	4.28571	0.0102186	0.233333	0.558333	16	8	FALSE	CXCL1	14.6875	16	0	0	0.72619	FALSE	0	CXCL1	6214	0.430147
11994	3.66102	0.00029823	0.273148	0.875	16	8	FALSE	ANAPC15	19.875	16	0	0	0.778249	FALSE	0	ANAPC15	102	0.414062
12012	3.57627	0.0002001	0.279621	0.916667	16	8	FALSE	ANAPC7	21	16	0	0	0.785311	FALSE	0	ANAPC7	146	0.388889
14232	2.92157	0.00058719	0.342282	0.916667	16	7	FALSE	IFI27	19.9375	16	0	0	0.759804	FALSE	0	IFI27	20	0.6875
14249	2.92157	0.00270935	0.342282	0.825	16	7	FALSE	OAS3	19.25	16	0	0	0.759804	FALSE	0	OAS3	56	0.663793
14315	2.56863	0.0893646	0.389313	0.791667	16	6	FALSE	OASL	19	16	0	0	0.803922	FALSE	0	OASL	1530	0.633333
16824	2.49281	0.0143846	0.401154	0.691667	16	5	FALSE	RPP38	48	16	0	0	0.751199	FALSE	0	RPP38	35670	0.307692
17972	3.9774	0.0201844	0.25142	0.641667	16	9	FALSE	MORF4L1	15.875	16	0	0	0.751883	FALSE	0	MORF4L1	40532	0.3175
18125	4.71186	0.00022322	0.21223	0.7	16	10	FALSE	HIST1H2AH	24.4375	16	0	0	0.690678	FALSE	0	HIST1H2AH	162	0.610938
18234	4.72881	0.00021451	0.21147	0.708333	16	10	FALSE	HIST2H2AB	23.4375	16	0	0	0.689266	FALSE	0	HIST2H2AB	154	0.600962
86	2.45	0.00224515	0.408163	0.628571	15	4	FALSE	THOC5	23.0667	15	0	0	0.71	FALSE	0	THOC5	3352	0.205952
92	2.23636	0.00315489	0.447154	0.409524	15	4	FALSE	UPF3B	31.5333	15	0	0	0.752727	FALSE	0	UPF3B	1884	0.202581
134	2.45	0.00275969	0.408163	0.609524	15	4	FALSE	THOC1	22.4	15	0	0	0.71	FALSE	0	THOC1	4494	0.2
142	2.25909	0.0144322	0.442656	0.409524	15	4	FALSE	CPSF1	24.1333	15	0	0	0.748182	FALSE	0	CPSF1	6854	0.161969
374	2.47727	0.00024835	0.40367	0.838095	15	5	FALSE	CD2BP2	56.0667	15	0	0	0.704545	FALSE	0	CD2BP2	214	0.431282
571	2.34545	0.00814283	0.426357	0.371429	15	4	FALSE	PAPOLA	28.7333	15	0	0	0.730909	FALSE	0	PAPOLA	4636	0.205238
921	2.20455	0.00276574	0.453608	0.419048	15	4	FALSE	SKIV2L2	46.5333	15	0	0	0.759091	FALSE	0	SKIV2L2	2282	0.28374
1205	2.33636	0.00038811	0.428016	0.580952	15	4	FALSE	TRA2B	42.4667	15	0	0	0.732727	FALSE	0	TRA2B	266	0.307729
1237	2.85909	0.00162576	0.349762	0.790476	15	5	FALSE	POLR2F	16.4667	15	0	0	0.628182	FALSE	0	POLR2F	884	0.238647
1239	2.59091	0.00312204	0.385965	0.790476	15	4	FALSE	POLR2H	20.6667	15	0	0	0.681818	FALSE	0	POLR2H	2536	0.208754
1254	2.85909	0.00162576	0.349762	0.790476	15	5	FALSE	POLR2E	16.4667	15	0	0	0.628182	FALSE	0	POLR2E	884	0.238647
1727	2.80455	0.00019961	0.356564	0.904762	15	4	FALSE	NUP88	24.4667	15	0	0	0.639091	FALSE	0	NUP88	334	0.382292
3576	2.42806	0.00996796	0.411852	0.619048	15	5	FALSE	EXOSC4	27.5333	15	0	0	0.76199	FALSE	0	EXOSC4	24504	0.156952
3926	2.83813	6.968e-05	0.352345	0.742857	15	5	FALSE	EIF3CL	33.3333	15	0	0	0.693645	FALSE	0	EIF3CL	178	0.387597
7424	2.39568	0.00719424	0.417417	0.866667	15	5	FALSE	SRPR	109.467	15	0	0	0.767386	FALSE	0	SRPR	17342	0.63237
11425	4.76984	0.0696287	0.209651	0.438095	15	9	FALSE	GNAI1	11.8	15	0	0	0.685847	FALSE	0	GNAI1	111144	0.325926
11534	4.17063	0.0376544	0.239772	0.514286	15	8	FALSE	CXCR2	14.2	15	0	0	0.73578	FALSE	0	CXCR2	14454	0.37193
11695	5.24206	0.0131209	0.190765	0.542857	15	10	FALSE	GNG4	13.3333	15	0	0	0.646495	FALSE	0	GNG4	53514	0.392157
12002	3.62147	0.00020264	0.276131	0.914286	15	8	FALSE	CDC26	20.2667	15	0	0	0.781544	FALSE	0	CDC26	146	0.431206
13398	3.5092	0.0702693	0.284965	0.133333	15	7	FALSE	DYNC2H1	8.26667	15	0	0	0.7909	FALSE	0	DYNC2H1	34302	0.193651
13447	5.1411	0.0061142	0.194511	0.47619	15	10	FALSE	GOSR2	13.8667	15	0	0	0.654908	FALSE	0	GOSR2	1100	0.301449
13474	5.16564	0.0061176	0.193587	0.485714	15	10	FALSE	USO1	12.2667	15	0	0	0.652863	FALSE	0	USO1	988	0.292063
13519	5.30675	0.013852	0.188439	0.514286	15	10	FALSE	GOSR1	11.8	15	0	0	0.641104	FALSE	0	GOSR1	7682	0.345098
13950	4.39683	0.0496504	0.227437	0.342857	15	8	FALSE	GRP	9.53333	15	0	0	0.716931	FALSE	0	GRP	26422	0.198611
13982	4.34127	0.0409809	0.230347	0.409524	15	8	FALSE	TAC1	11.4	15	0	0	0.721561	FALSE	0	TAC1	62178	0.211111
14520	2.20482	0.0109225	0.453552	0.542857	15	4	FALSE	AP2A2	16.4	15	0	0	0.799197	FALSE	0	AP2A2	618	0.315385
14536	2.20482	0.00814471	0.453552	0.571429	15	4	FALSE	CLTB	15.7333	15	0	0	0.799197	FALSE	0	CLTB	564	0.302564
14538	2.33735	0.0989269	0.427835	0.419048	15	5	FALSE	ACTR2	10.2667	15	0	0	0.777108	FALSE	0	ACTR2	3200	0.209524
14608	2.10843	0.0324293	0.474286	0.371429	15	4	FALSE	ITSN1	15.1333	15	0	0	0.815261	FALSE	0	ITSN1	1650	0.252222
14664	2.19277	0.00508256	0.456044	0.657143	15	4	FALSE	CLTCL1	17.4667	15	0	0	0.801205	FALSE	0	CLTCL1	308	0.32956
15356	1.73214	0.00683417	0.57732	0.67619	15	2	FALSE	NDUFAF5	35.2667	15	0	0	0.755952	FALSE	0	NDUFAF5	98	0.64
16069	3.46012	0.035445	0.289007	0.495238	15	8	FALSE	TUBA1A	13.0667	15	0	0	0.79499	FALSE	0	TUBA1A	16666	0.204167
16440	5.57143	0.00209808	0.179487	0.419048	15	10	FALSE	TGFB1	10.3333	15	0	0	0.619048	FALSE	0	TGFB1	576	0.258333
17968	4.73446	0.00046786	0.211217	0.761905	15	10	FALSE	YEATS4	14.9333	15	0	0	0.688795	FALSE	0	YEATS4	152	0.382906
17978	3.9887	0.036154	0.250708	0.609524	15	9	FALSE	EP400	16.4667	15	0	0	0.750942	FALSE	0	EP400	87686	0.336054
18054	4.76271	8.291e-05	0.209964	0.761905	15	10	FALSE	H2AFB1	24.4667	15	0	0	0.686441	FALSE	0	H2AFB1	56	0.764583
112	2.30909	0.00087123	0.433071	0.307692	14	4	FALSE	SRSF11	36.0714	14	0	0	0.738182	FALSE	0	SRSF11	560	0.251748
136	2.66364	0.00133072	0.375427	0.582418	14	4	FALSE	THOC7	18.0714	14	0	0	0.667273	FALSE	0	THOC7	1792	0.237782
552	2.57273	0.00672122	0.388693	0.483516	14	4	FALSE	CPSF4	19.9286	14	0	0	0.685455	FALSE	0	CPSF4	4906	0.233613
995	2.45	0.00016292	0.408163	0.681319	14	4	FALSE	HNRNPL	41.7143	14	0	0	0.71	FALSE	0	HNRNPL	144	0.362733
1156	2.67273	0.00182424	0.37415	0.879121	14	5	FALSE	POLR2C	19.5	14	0	0	0.665455	FALSE	0	POLR2C	1736	0.207447
1245	3.04091	0.00073992	0.328849	0.89011	14	5	FALSE	POLR2I	15.0714	14	0	0	0.591818	FALSE	0	POLR2I	250	0.376786
1257	2.93182	0.00119345	0.341085	0.857143	14	5	FALSE	GTF2F2	14.8571	14	0	0	0.613636	FALSE	0	GTF2F2	662	0.379121
1700	3.00909	0.00088616	0.332326	0.769231	14	4	FALSE	NDC1	20.8571	14	0	0	0.598182	FALSE	0	NDC1	1278	0.548872
1704	2.9	0.00076533	0.344828	0.89011	14	4	FALSE	NUP43	22.8571	14	0	0	0.62	FALSE	0	NUP43	1840	0.486322
3564	2.52158	0.0054552	0.396576	0.725275	14	5	FALSE	EXOSC3	29.7143	14	0	0	0.746403	FALSE	0	EXOSC3	28444	0.19295
3566	2.50719	0.00452238	0.398852	0.747253	14	5	FALSE	EXOSC5	28.7143	14	0	0	0.748801	FALSE	0	EXOSC5	22858	0.186456
3570	2.91007	0.00046299	0.343634	0.725275	14	5	FALSE	EXOSC9	23	14	0	0	0.681655	FALSE	0	EXOSC9	1570	0.323944
8257	2.5036	0.00770585	0.399425	0.505495	14	5	FALSE	SRP14	67.6429	14	0	0	0.7494	FALSE	0	SRP14	27524	0.439239
11443	4.07143	0.13466	0.245614	0.483516	14	8	FALSE	CCR5	16	14	0	0	0.744048	FALSE	0	CCR5	268796	0.358766
11697	5.60317	0.0124121	0.17847	0.417582	14	10	FALSE	GNGT1	12.5	14	0	0	0.616402	FALSE	0	GNGT1	40536	0.388393
11715	5.2381	0.0323205	0.190909	0.274725	14	10	FALSE	GNG2	11.2143	14	0	0	0.646825	FALSE	0	GNG2	48958	0.341518
13429	5.22086	0.00254409	0.191539	0.549451	14	10	FALSE	COPA	12.3571	14	0	0	0.648262	FALSE	0	COPA	522	0.361345
13460	4.56442	0.0431685	0.219086	0.483516	14	9	FALSE	RAB1A	12.7143	14	0	0	0.702965	FALSE	0	RAB1A	9190	0.254286
13517	4.61963	0.0123403	0.216467	0.582418	14	9	FALSE	NSF	12.7857	14	0	0	0.698364	FALSE	0	NSF	8092	0.310105
13952	4.79365	0.022856	0.208609	0.406593	14	9	FALSE	TRH	11.1429	14	0	0	0.683862	FALSE	0	TRH	22400	0.225948
14234	2.64706	0.164498	0.377778	0.384615	14	6	FALSE	IRF1	14.2143	14	0	0	0.794118	FALSE	0	IRF1	2190	0.456221
14516	2.10843	0.0379417	0.474286	0.461538	14	4	FALSE	HIP1R	16.2857	14	0	0	0.815261	FALSE	0	HIP1R	1784	0.266979
14597	2.06024	0.0571776	0.48538	0.307692	14	4	FALSE	DNM2	14.7857	14	0	0	0.823293	FALSE	0	DNM2	2172	0.227473
14600	2.20482	0.00474414	0.453552	0.659341	14	4	FALSE	EPN1	17.9286	14	0	0	0.799197	FALSE	0	EPN1	258	0.338275
14602	2.13253	0.0549955	0.468927	0.318681	14	4	FALSE	DNM1	13.8571	14	0	0	0.811245	FALSE	0	DNM1	2252	0.237685
15403	1.75	0.00233565	0.571429	0.736264	14	2	FALSE	NDUFAF2	36.8571	14	0	0	0.75	FALSE	0	NDUFAF2	62	0.658163
16067	3.53988	0.0335851	0.282496	0.483516	14	8	FALSE	TUBA4A	12.5714	14	0	0	0.788344	FALSE	0	TUBA4A	18378	0.22449
16134	3.96933	0.0214995	0.251932	0.32967	14	9	FALSE	PCNT	10.6429	14	0	0	0.752556	FALSE	0	PCNT	5312	0.192208
16138	4.01227	0.0617225	0.249235	0.285714	14	9	FALSE	PLK4	9.78571	14	0	0	0.748978	FALSE	0	PLK4	24458	0.202381
16218	4.09816	0.00465798	0.244012	0.505495	14	9	FALSE	TUBGCP2	11.4286	14	0	0	0.74182	FALSE	0	TUBGCP2	1328	0.285714
16863	2.66906	5.915e-05	0.374663	0.868132	14	5	FALSE	DKC1	48.7857	14	0	0	0.721823	FALSE	0	DKC1	104	0.455941
17974	4.74011	0.00036023	0.210965	0.791209	14	10	FALSE	ING3	15.4286	14	0	0	0.688324	FALSE	0	ING3	120	0.395604
17980	4.74011	0.00028608	0.210965	0.824176	14	10	FALSE	DMAP1	15.6429	14	0	0	0.688324	FALSE	0	DMAP1	98	0.401099
17992	4.74011	0.00124859	0.210965	0.648352	14	10	FALSE	RUVBL2	14.5714	14	0	0	0.688324	FALSE	0	RUVBL2	242	0.373626
18286	4.74011	0.00021451	0.210965	0.615385	14	10	FALSE	HIST3H2A	23.8571	14	0	0	0.688324	FALSE	0	HIST3H2A	154	0.611722
124	2.64545	0.00397593	0.378007	0.551282	13	4	FALSE	CPSF2	16	13	0	0	0.670909	FALSE	0	CPSF2	2628	0.207792
555	2.80909	0.00213135	0.355987	0.589744	13	4	FALSE	CSTF3	12	13	0	0	0.638182	FALSE	0	CSTF3	782	0.243328
561	2.97273	0.00484879	0.336391	0.448718	13	5	FALSE	PCF11	12.5385	13	0	0	0.605455	FALSE	0	PCF11	1472	0.291592
1241	3.09545	0	0.323054	1	13	5	FALSE	POLR2D	15.3077	13	0	0	0.580909	FALSE	0	POLR2D	0	0.478365
1243	3.09545	0	0.323054	1	13	5	FALSE	POLR2G	15.3077	13	0	0	0.580909	FALSE	0	POLR2G	0	0.478365
1250	3.09545	0	0.323054	1	13	5	FALSE	POLR2K	15.3077	13	0	0	0.580909	FALSE	0	POLR2K	0	0.478365
3553	2.19784	0.00032596	0.454992	0.589744	13	4	FALSE	NHP2	91.0769	13	0	0	0.80036	FALSE	0	NHP2	994	0.413986
3578	2.98921	0.00452217	0.334537	0.794872	13	5	FALSE	EXOSC6	16.8462	13	0	0	0.668465	FALSE	0	EXOSC6	13284	0.251435
3582	3.11871	0.00286443	0.320646	0.705128	13	6	FALSE	EXOSC8	15.8462	13	0	0	0.646882	FALSE	0	EXOSC8	9844	0.262821
3607	2.52878	0.00643044	0.395448	0.538462	13	5	FALSE	SEC61B	24.7692	13	0	0	0.745204	FALSE	0	SEC61B	16042	0.166236
4013	2.42086	0	0.413076	1	13	4	FALSE	EIF1AY	127.077	13	0	0	0.763189	FALSE	0	EIF1AY	0	0.75641
11441	4.47222	0.0075253	0.223602	0.564103	13	8	FALSE	CXCR4	16.2308	13	0	0	0.710648	FALSE	0	CXCR4	7036	0.502404
11463	4.53968	0.126854	0.22028	0.448718	13	9	FALSE	GNAI2	12.8462	13	0	0	0.705026	FALSE	0	GNAI2	261602	0.271686
13435	4.60736	0.0111933	0.217044	0.512821	13	9	FALSE	COPB2	12.3846	13	0	0	0.699387	FALSE	0	COPB2	3682	0.284436
13462	5.15951	0.00308818	0.193817	0.538462	13	10	FALSE	BET1	13.9231	13	0	0	0.653374	FALSE	0	BET1	592	0.309402
13978	5.09921	0.00674923	0.196109	0.487179	13	9	FALSE	CCK	10.5385	13	0	0	0.658399	FALSE	0	CCK	16986	0.257036
13987	4.36111	0.0578149	0.229299	0.358974	13	8	FALSE	NTS	10.6923	13	0	0	0.719907	FALSE	0	NTS	30690	0.209231
14213	2.90196	0.00427534	0.344595	0.858974	13	7	FALSE	BST2	19.9231	13	0	0	0.762255	FALSE	0	BST2	106	0.622596
14532	2.37349	0.00381975	0.42132	0.615385	13	4	FALSE	AP2M1	16.2308	13	0	0	0.771084	FALSE	0	AP2M1	250	0.352843
16145	4.1411	0.00929348	0.241481	0.474359	13	9	FALSE	TUBGCP6	11	13	0	0	0.738241	FALSE	0	TUBGCP6	6620	0.312088
16288	4.11043	0.00428525	0.243284	0.5	13	9	FALSE	TUBGCP3	11.6154	13	0	0	0.740798	FALSE	0	TUBGCP3	1282	0.29783
16396	4.76984	0.0555615	0.209651	0.320513	13	9	FALSE	VWF	11.4615	13	0	0	0.685847	FALSE	0	VWF	76468	0.226154
16411	5.57937	0.0135146	0.179232	0.410256	13	10	FALSE	FGG	10.4615	13	0	0	0.618386	FALSE	0	FGG	15544	0.273279
17804	3.28571	0.213804	0.304348	0.179487	13	7	FALSE	GSTT1	5.84615	13	0	0	0.746032	FALSE	0	GSTT1	14740	0.173077
17815	3.26374	0.297475	0.306397	0.115385	13	7	FALSE	HPGDS	5.76923	13	0	0	0.748474	FALSE	0	HPGDS	18530	0.158242
17982	4.75706	0.00027718	0.210214	0.820513	13	10	FALSE	MRGBP	15	13	0	0	0.686911	FALSE	0	MRGBP	100	0.405405
138	2.33182	0.00071306	0.42885	0.575758	12	4	FALSE	MAGOHB	35.75	12	0	0	0.733636	FALSE	0	MAGOHB	1084	0.253546
174	2.45	0.0025977	0.408163	0.409091	12	4	FALSE	NXT1	25.25	12	0	0	0.71	FALSE	0	NXT1	2246	0.217672
368	2.37273	0.00089961	0.421456	0.545455	12	4	FALSE	CHERP	45.0833	12	0	0	0.725455	FALSE	0	CHERP	678	0.31974
559	2.73182	0.00133457	0.366057	0.666667	12	4	FALSE	CSTF2	13.8333	12	0	0	0.653636	FALSE	0	CSTF2	1060	0.226776
568	2.73182	0.00131197	0.366057	0.651515	12	4	FALSE	FIP1L1	13.8333	12	0	0	0.653636	FALSE	0	FIP1L1	1068	0.226776
1084	2.33636	0.00024006	0.428016	0.590909	12	4	FALSE	YBX1	50.0833	12	0	0	0.732727	FALSE	0	YBX1	260	0.350233
1549	2.46364	0.00020927	0.405904	0.515152	12	4	FALSE	HNRNPUL1	43.0833	12	0	0	0.707273	FALSE	0	HNRNPUL1	172	0.356061
1734	2.42273	0.00914901	0.412758	0.772727	12	4	FALSE	LSM10	57.8333	12	0	0	0.715455	FALSE	0	LSM10	6482	0.462
3574	2.99281	7.264e-05	0.334135	0.924242	12	5	FALSE	EXOSC1	18.1667	12	0	0	0.667866	FALSE	0	EXOSC1	378	0.271144
3580	2.99281	7.264e-05	0.334135	0.924242	12	5	FALSE	EXOSC7	18.1667	12	0	0	0.667866	FALSE	0	EXOSC7	378	0.271144
11473	4.31349	0.00081868	0.231831	0.848485	12	8	FALSE	CXCL13	17.25	12	0	0	0.723876	FALSE	0	CXCL13	1764	0.507353
11478	4.27778	0.00232634	0.233766	0.742424	12	8	FALSE	CXCR3	17.9167	12	0	0	0.726852	FALSE	0	CXCR3	2334	0.511905
11483	4.4881	0.00159654	0.222812	0.636364	12	8	FALSE	CCR2	17.1667	12	0	0	0.709325	FALSE	0	CCR2	2684	0.551075
11515	4.31349	0.00360929	0.231831	0.590909	12	8	FALSE	CCL21	14.8333	12	0	0	0.723876	FALSE	0	CCL21	2964	0.436275
11543	4.05159	0.31077	0.246817	0.469697	12	8	FALSE	PF4	19.5	12	0	0	0.745701	FALSE	0	PF4	306554	0.282609
11603	4.48413	0.0945721	0.223009	0.0757576	12	8	FALSE	SST	4.41667	12	0	0	0.709656	FALSE	0	SST	28532	0.122396
11990	3.75141	0.00021157	0.266566	0.787879	12	8	FALSE	BUB3	18.9167	12	0	0	0.770716	FALSE	0	BUB3	48	0.525463
12047	3.84181	0.0478541	0.260294	0.242424	12	9	FALSE	UBE2D1	10.3333	12	0	0	0.763183	FALSE	0	UBE2D1	279994	0.202381
12245	3.49718	0.00414164	0.285945	0.621212	12	8	FALSE	SKP2	16.0833	12	0	0	0.791902	FALSE	0	SKP2	9034	0.309295
13058	3.27684	0	0.305172	1	12	7	FALSE	UBLCP1	48.25	12	0	0	0.810264	FALSE	0	UBLCP1	0	0.817797
13389	3.79141	0.0151413	0.263754	0.424242	12	8	FALSE	DCTN2	9.5	12	0	0	0.767382	FALSE	0	DCTN2	6714	0.241453
13526	4.68712	0.00869787	0.213351	0.727273	12	9	FALSE	YKT6	13.25	12	0	0	0.69274	FALSE	0	YKT6	6796	0.401515
13528	4.69325	0.00999191	0.213072	0.575758	12	9	FALSE	NAPA	12.25	12	0	0	0.692229	FALSE	0	NAPA	7004	0.382812
13553	4.04294	0.120146	0.247344	0.424242	12	8	FALSE	STX18	9.83333	12	0	0	0.746421	FALSE	0	STX18	37974	0.317204
13962	5.1627	0.0367607	0.193697	0.363636	12	9	FALSE	GNRH1	9.58333	12	0	0	0.653108	FALSE	0	GNRH1	65622	0.266204
13965	5.10317	0.0213182	0.195956	0.439394	12	9	FALSE	GCG	10.4167	12	0	0	0.658069	FALSE	0	GCG	34646	0.262821
14359	2.98039	0.00096895	0.335526	0.818182	12	7	FALSE	RNASEL	19.3333	12	0	0	0.752451	FALSE	0	RNASEL	30	0.644444
14564	2.92771	0.00710253	0.341564	0.621212	12	6	FALSE	ARPC2	9.33333	12	0	0	0.678715	FALSE	0	ARPC2	280	0.358974
14566	2.62651	0.0196654	0.380734	0.621212	12	5	FALSE	ARPC1A	10.3333	12	0	0	0.728916	FALSE	0	ARPC1A	910	0.322917
14593	2.28916	0.014603	0.436842	0.454545	12	5	FALSE	AMPH	14.5833	12	0	0	0.785141	FALSE	0	AMPH	708	0.280449
14941	1.78571	0.0008485	0.56	0.833333	12	2	FALSE	ACAD9	35	12	0	0	0.738095	FALSE	0	ACAD9	28	0.625
16081	4.92638	0.00449787	0.202989	0.560606	12	10	FALSE	NPHP4	8.16667	12	0	0	0.672802	FALSE	0	NPHP4	2612	0.371212
16121	4	0.0599978	0.25	0.393939	12	9	FALSE	CCP110	10	12	0	0	0.75	FALSE	0	CCP110	10404	0.185185
16132	3.99387	0.0201964	0.250384	0.469697	12	9	FALSE	CEP135	10.75	12	0	0	0.750511	FALSE	0	CEP135	7170	0.199074
16438	5.56349	0.00856103	0.179743	0.545455	12	10	FALSE	SERPINE1	12.9167	12	0	0	0.619709	FALSE	0	SERPINE1	11976	0.305556
16522	5.57937	0.00871081	0.179232	0.454545	12	10	FALSE	THBS1	10.6667	12	0	0	0.618386	FALSE	0	THBS1	9598	0.271368
16676	3.25275	0.247057	0.307432	0.166667	12	5	FALSE	CYP3A4	5.83333	12	0	0	0.749695	FALSE	0	CYP3A4	24080	0.232639
17939	6.11111	0.0141822	0.163636	0.333333	12	11	FALSE	GNAT2	11.6667	12	0	0	0.574074	FALSE	0	GNAT2	54778	0.383333
241	2.52273	0.00033702	0.396396	0.581818	11	5	FALSE	CTNNBL1	56.3636	11	0	0	0.695455	FALSE	0	CTNNBL1	282	0.433566
483	2.19091	0.0153849	0.456432	0.290909	11	4	FALSE	HSPA8	44.5455	11	0	0	0.761818	FALSE	0	HSPA8	6340	0.262032
1207	2.52273	0.00035055	0.396396	0.436364	11	4	FALSE	PCBP2	33.3636	11	0	0	0.695455	FALSE	0	PCBP2	190	0.308923
1334	2.4	0.00017017	0.416667	0.672727	11	4	FALSE	PCBP1	58.1818	11	0	0	0.72	FALSE	0	PCBP1	226	0.437457
3563	3.1295	6.748e-05	0.31954	0.836364	11	6	FALSE	C1D	17.8182	11	0	0	0.645084	FALSE	0	C1D	30	0.29697
11468	4.71825	0.00065893	0.211943	0.8	11	9	FALSE	CCL19	16.6364	11	0	0	0.690145	FALSE	0	CCL19	1550	0.504132
11480	4.49603	0.00824831	0.222418	0.690909	11	8	FALSE	CCR7	17.0909	11	0	0	0.708664	FALSE	0	CCR7	6016	0.566667
11531	4.40079	0.00185833	0.227232	0.581818	11	8	FALSE	CXCR1	14.3636	11	0	0	0.716601	FALSE	0	CXCR1	1674	0.435262
11707	5.61508	0.00566733	0.178092	0.527273	11	10	FALSE	GNG11	13.9091	11	0	0	0.61541	FALSE	0	GNG11	24464	0.431818
11756	6.14286	0.00014821	0.162791	0.6	11	11	FALSE	GNG13	12.6364	11	0	0	0.571429	FALSE	0	GNG13	70	0.486014
12054	3.27119	0.0354306	0.305699	0.4	11	8	FALSE	CUL3	17.0909	11	0	0	0.810734	FALSE	0	CUL3	97854	0.183794
12231	3.54237	0.00335196	0.282297	0.654545	11	8	FALSE	CDKN1A	14.6364	11	0	0	0.788136	FALSE	0	CDKN1A	9722	0.311412
13453	4.53988	0.00923602	0.22027	0.581818	11	9	FALSE	ARFGAP3	14.2727	11	0	0	0.70501	FALSE	0	ARFGAP3	7936	0.348115
13559	3.19632	0.298916	0.31286	0.563636	11	6	FALSE	CENPE	10.5455	11	0	0	0.816973	FALSE	0	CENPE	112960	0.261364
13562	3.30675	0.0999487	0.302412	0.6	11	7	FALSE	KIF11	10.7273	11	0	0	0.807771	FALSE	0	KIF11	47022	0.261641
13579	5.23313	0.00264116	0.19109	0.690909	11	10	FALSE	COG1	13.5455	11	0	0	0.647239	FALSE	0	COG1	4724	0.347319
13580	5.19018	0.00472361	0.192671	0.563636	11	10	FALSE	COG4	13.1818	11	0	0	0.650818	FALSE	0	COG4	4702	0.299587
14515	2.27711	0.0032531	0.439153	0.709091	11	4	FALSE	AAK1	17.7273	11	0	0	0.787149	FALSE	0	AAK1	256	0.354545
14555	2.71084	0.0133878	0.368889	0.672727	11	5	FALSE	ARPC3	10.6364	11	0	0	0.714859	FALSE	0	ARPC3	658	0.322314
14591	2.3253	0.0826296	0.430052	0.181818	11	5	FALSE	RAB5A	7.63636	11	0	0	0.779116	FALSE	0	RAB5A	2242	0.155303
14613	2.53012	0.007879	0.395238	0.436364	11	4	FALSE	AP1B1	13.0909	11	0	0	0.74498	FALSE	0	AP1B1	402	0.31929
16071	3.56442	0.00864806	0.280551	0.690909	11	8	FALSE	TUBB4B	15.2727	11	0	0	0.786299	FALSE	0	TUBB4B	6342	0.272727
16075	3.56442	0.084658	0.280551	0.563636	11	8	FALSE	TUBB	14	11	0	0	0.786299	FALSE	0	TUBB	26984	0.257576
16207	3.58896	0.0149195	0.278632	0.490909	11	8	FALSE	MAPRE1	12.1818	11	0	0	0.784254	FALSE	0	MAPRE1	4400	0.229846
16398	5.61111	0.0169224	0.178218	0.4	11	10	FALSE	AHSG	8.72727	11	0	0	0.615741	FALSE	0	AHSG	8004	0.258953
144	2.18636	0.00476428	0.45738	0.377778	10	4	FALSE	SRRT	48.4	10	0	0	0.762727	FALSE	0	SRRT	2604	0.284118
563	2.95	0.00016068	0.338983	0.866667	10	5	FALSE	CPSF3	12.4	10	0	0	0.61	FALSE	0	CPSF3	182	0.3875
2114	3.05	0	0.327869	1	10	4	FALSE	NUP188	23.2	10	0	0	0.59	FALSE	0	NUP188	0	0.627027
3684	2.46043	4.96e-06	0.406433	0.866667	10	5	FALSE	EEF1B2	109.5	10	0	0	0.756595	FALSE	0	EEF1B2	18	0.671779
4520	2.60432	0.00055653	0.383978	0.688889	10	5	FALSE	UPF1	30.2	10	0	0	0.732614	FALSE	0	UPF1	2486	0.201333
11500	4.46825	0.00058892	0.223801	0.822222	10	8	FALSE	CXCL2	16.8	10	0	0	0.710979	FALSE	0	CXCL2	722	0.525
11736	5.62698	0.00079498	0.177715	0.688889	10	10	FALSE	GNAO1	15	10	0	0	0.614418	FALSE	0	GNAO1	2554	0.46875
11751	6.13095	0.00099684	0.163107	0.555556	10	11	FALSE	GNGT2	13.3	10	0	0	0.572421	FALSE	0	GNGT2	6762	0.471429
11760	6.12302	0.0061245	0.163318	0.422222	10	11	FALSE	GNAT1	13.1	10	0	0	0.573082	FALSE	0	GNAT1	25568	0.433333
11770	6.13492	0.00034756	0.163001	0.533333	10	11	FALSE	GNAT3	13.9	10	0	0	0.57209	FALSE	0	GNAT3	184	0.492857
12227	3.57627	0.00187472	0.279621	0.711111	10	8	FALSE	CDKN1B	15.6	10	0	0	0.785311	FALSE	0	CDKN1B	9312	0.371429
12378	3.29944	0	0.303082	1	10	7	FALSE	MPND	48.2	10	0	0	0.80838	FALSE	0	MPND	0	0.816949
13049	3.54237	0	0.282297	1	10	7	FALSE	UBFD1	47.8	10	0	0	0.788136	FALSE	0	UBFD1	0	0.869091
13383	3.82822	0.0105441	0.261218	0.577778	10	8	FALSE	ACTR1B	10.9	10	0	0	0.764315	FALSE	0	ACTR1B	9078	0.302778
13400	3.80982	0.0102816	0.26248	0.466667	10	8	FALSE	DCTN1	11.2	10	0	0	0.765849	FALSE	0	DCTN1	7610	0.287179
13451	4.58282	0.00563805	0.218206	0.688889	10	9	FALSE	ARFGAP2	14.4	10	0	0	0.701431	FALSE	0	ARFGAP2	6216	0.4
13482	3.62577	0.240957	0.275804	0.6	10	7	FALSE	KIF23	8	10	0	0	0.781186	FALSE	0	KIF23	128570	0.39
13523	4.7362	0.0082192	0.21114	0.644444	10	9	FALSE	NAPB	12.9	10	0	0	0.68865	FALSE	0	NAPB	6736	0.416129
13535	5.37423	0.00041568	0.186073	0.711111	10	10	FALSE	BET1L	13.7	10	0	0	0.635481	FALSE	0	BET1L	104	0.415152
13551	4.13497	0.0565056	0.24184	0.511111	10	8	FALSE	USE1	9.8	10	0	0	0.738753	FALSE	0	USE1	25198	0.392
13698	4.39877	0.0145808	0.227336	0.355556	10	9	FALSE	KLC1	6.8	10	0	0	0.716769	FALSE	0	KLC1	4068	0.286957
13935	4.19841	0.0548194	0.238185	0.222222	10	8	FALSE	EDN1	8.8	10	0	0	0.733466	FALSE	0	EDN1	48906	0.195455
13949	4.36905	0.0335236	0.228883	0.266667	10	8	FALSE	AVP	10.8	10	0	0	0.719246	FALSE	0	AVP	38592	0.21
13992	5.13492	0.00445791	0.194745	0.622222	10	9	FALSE	GAST	11.6	10	0	0	0.655423	FALSE	0	GAST	13104	0.305263
14104	5.20238	0.0158815	0.19222	0.422222	10	9	FALSE	TAC3	8.8	10	0	0	0.649802	FALSE	0	TAC3	29134	0.283871
14361	2.68627	0.0471244	0.372263	0.8	10	6	FALSE	IRF3	18.9	10	0	0	0.789216	FALSE	0	IRF3	834	0.63
14547	2.95181	0.00267942	0.338776	0.777778	10	6	FALSE	ACTR3	10.6	10	0	0	0.674699	FALSE	0	ACTR3	152	0.407692
16083	4.93865	0.00351378	0.202484	0.733333	10	10	FALSE	TMEM67	9.2	10	0	0	0.671779	FALSE	0	TMEM67	2534	0.418182
16085	4.93865	0.00351378	0.202484	0.733333	10	10	FALSE	CC2D2A	9.2	10	0	0	0.671779	FALSE	0	CC2D2A	2534	0.418182
16089	4.23926	0.0700079	0.23589	0.555556	10	9	FALSE	NPHP1	9.3	10	0	0	0.730061	FALSE	0	NPHP1	20042	0.296774
16205	4.15951	0.00828072	0.240413	0.533333	10	9	FALSE	CKAP5	11.8	10	0	0	0.736708	FALSE	0	CKAP5	7020	0.344118
16385	5.5873	0.00077166	0.178977	0.6	10	10	FALSE	IGF1	13.2	10	0	0	0.617725	FALSE	0	IGF1	210	0.33
16399	5.60714	0.00971777	0.178344	0.422222	10	10	FALSE	FGA	9.6	10	0	0	0.616071	FALSE	0	FGA	5414	0.271429
16401	5.59127	0.00332926	0.17885	0.577778	10	10	FALSE	FGB	12.6	10	0	0	0.617394	FALSE	0	FGB	5264	0.323077
16446	5.57143	0.00091673	0.179487	0.577778	10	10	FALSE	FN1	14.7	10	0	0	0.619048	FALSE	0	FN1	362	0.334091
16664	2.93407	0.186481	0.340824	0.0444444	10	5	FALSE	UGT1A1	6.4	10	0	0	0.785104	FALSE	0	UGT1A1	18968	0.247826
16670	2.93407	0.186481	0.340824	0.0444444	10	5	FALSE	UGT1A6	6.4	10	0	0	0.785104	FALSE	0	UGT1A6	18968	0.247826
16695	3.72527	0.0799472	0.268437	0	10	6	FALSE	CYP2B6	4.8	10	0	0	0.697192	FALSE	0	CYP2B6	6462	0.422222
16723	2.86813	0.588925	0.348659	0.155556	10	6	FALSE	CYP2E1	7.8	10	0	0	0.79243	FALSE	0	CYP2E1	54588	0.202778
17154	3.2482	0	0.307863	1	10	6	FALSE	MPHOSPH6	14.8	10	0	0	0.6253	FALSE	0	MPHOSPH6	0	0.448485
17823	3.96703	0.0417363	0.252078	0.177778	10	8	FALSE	GSR	5.7	10	0	0	0.67033	FALSE	0	GSR	2726	0.22
17827	3.98901	0.0866795	0.250689	0.155556	10	8	FALSE	GSS	5.4	10	0	0	0.667888	FALSE	0	GSS	4722	0.221739
17976	4.81921	7.13e-06	0.207503	0.977778	10	10	FALSE	EPC1	15.3	10	0	0	0.681733	FALSE	0	EPC1	2	0.527586
17986	4.81921	7.13e-06	0.207503	0.977778	10	10	FALSE	MEAF6	15.3	10	0	0	0.681733	FALSE	0	MEAF6	2	0.527586
154	2.48636	0.00038961	0.402194	0.833333	9	4	FALSE	THOC6	31.6667	9	0	0	0.702727	FALSE	0	THOC6	390	0.261708
213	2.6	0.00054383	0.384615	0.222222	9	5	FALSE	PQBP1	27.6667	9	0	0	0.68	FALSE	0	PQBP1	218	0.232493
549	2.64091	0.0028462	0.378657	0.583333	9	4	FALSE	CLP1	17.5556	9	0	0	0.671818	FALSE	0	CLP1	1992	0.215364
605	2.68182	0.00226541	0.372881	0.361111	9	4	FALSE	NUDT21	17.7778	9	0	0	0.663636	FALSE	0	NUDT21	1134	0.220833
1200	2.39545	0.0001435	0.417457	0.583333	9	4	FALSE	ELAVL1	44.4444	9	0	0	0.720909	FALSE	0	ELAVL1	152	0.339271
2929	2.44091	3.382e-05	0.409683	0.75	9	4	FALSE	WBP4	61.5556	9	0	0	0.711818	FALSE	0	WBP4	30	0.46633
3604	3.08273	0.00045159	0.324387	0.722222	9	5	FALSE	DDOST	18.3333	9	0	0	0.652878	FALSE	0	DDOST	3010	0.310734
3611	3.10072	0.00044346	0.322506	0.694444	9	5	FALSE	SSR3	17.4444	9	0	0	0.64988	FALSE	0	SSR3	2862	0.317172
3619	3.11151	0.00390893	0.321387	0.611111	9	5	FALSE	SSR1	16.6667	9	0	0	0.648082	FALSE	0	SSR1	40526	0.320513
4522	3.08993	0.00019822	0.323632	0.722222	9	5	FALSE	UPF2	18	9	0	0	0.651679	FALSE	0	UPF2	266	0.268657
11329	3.10072	0.00402268	0.322506	0.583333	9	5	FALSE	SSR2	16.6667	9	0	0	0.64988	FALSE	0	SSR2	40524	0.30303
11693	4.4881	0.0635918	0.222812	0.0555556	9	8	FALSE	NPY	5.55556	9	0	0	0.709325	FALSE	0	NPY	21960	0.148148
12156	3.66667	0.00134894	0.272727	0.638889	9	8	FALSE	AURKB	16.7778	9	0	0	0.777778	FALSE	0	AURKB	286	0.42735
12194	2.83051	0.430794	0.353293	0.583333	9	7	FALSE	BRCC3	42.5556	9	0	0	0.847458	FALSE	0	BRCC3	1618982	0.542735
12219	3.89831	0.00210504	0.256522	0.555556	9	9	FALSE	CCNA1	16.7778	9	0	0	0.758475	FALSE	0	CCNA1	748	0.349537
13433	5.25153	0.00017144	0.190421	0.888889	9	10	FALSE	COPE	14.8889	9	0	0	0.645706	FALSE	0	COPE	52	0.425397
13441	5.25153	0.00017357	0.190421	0.833333	9	10	FALSE	COPZ1	15.1111	9	0	0	0.645706	FALSE	0	COPZ1	48	0.431746
13444	5.28221	0.00021036	0.189315	0.666667	9	10	FALSE	ARF4	13.4444	9	0	0	0.643149	FALSE	0	ARF4	44	0.448148
13449	5.19632	0.0024325	0.192444	0.472222	9	10	FALSE	RAB1B	14.8889	9	0	0	0.650307	FALSE	0	RAB1B	446	0.346253
13455	4.56442	0.0107646	0.219086	0.583333	9	9	FALSE	GBF1	15.2222	9	0	0	0.702965	FALSE	0	GBF1	7994	0.362434
13469	4.6135	0.00599976	0.216755	0.583333	9	9	FALSE	ARFGAP1	12	9	0	0	0.698875	FALSE	0	ARFGAP1	6246	0.375
13572	3.34969	0.0756079	0.298535	0.694444	9	7	FALSE	KIF18A	11.7778	9	0	0	0.804192	FALSE	0	KIF18A	43606	0.318318
13575	3.89571	0.00382474	0.256693	0.75	9	7	FALSE	KIF2C	8.33333	9	0	0	0.758691	FALSE	0	KIF2C	460	0.587302
13582	5.29448	0.00165831	0.188876	0.777778	9	10	FALSE	COG6	12.5556	9	0	0	0.642127	FALSE	0	COG6	3124	0.392361
13586	5.27607	0.0009059	0.189535	0.805556	9	10	FALSE	COG5	12.2222	9	0	0	0.643661	FALSE	0	COG5	1580	0.339506
13595	5.27607	0.0009059	0.189535	0.805556	9	10	FALSE	COG7	12.2222	9	0	0	0.643661	FALSE	0	COG7	1580	0.339506
13681	3.87117	0.0134524	0.25832	0.444444	9	8	FALSE	KIF3A	10.2222	9	0	0	0.760736	FALSE	0	KIF3A	4856	0.283951
13938	4.51587	0.0399979	0.221441	0.111111	9	8	FALSE	F2	5.66667	9	0	0	0.707011	FALSE	0	F2	16908	0.1893
13967	4.4246	0.0241985	0.226009	0.388889	9	8	FALSE	OXT	11.8889	9	0	0	0.714616	FALSE	0	OXT	29090	0.277778
13998	5.14683	0.00947727	0.194295	0.305556	9	9	FALSE	HCRT	8.11111	9	0	0	0.654431	FALSE	0	HCRT	4358	0.25
14549	3.04819	0.00160978	0.328063	0.833333	9	6	FALSE	ARPC5	10.8889	9	0	0	0.658635	FALSE	0	ARPC5	84	0.435556
14952	1.875	0.00056307	0.533333	0.75	9	3	FALSE	TMEM126B	34.5556	9	0	0	0.708333	FALSE	0	TMEM126B	18	0.639918
16065	3.93865	0.0369398	0.253894	0.333333	9	9	FALSE	CETN2	12.7778	9	0	0	0.755112	FALSE	0	CETN2	10138	0.216475
16077	3.73006	0.00718156	0.268092	0.611111	9	8	FALSE	TUBB4A	14.7778	9	0	0	0.772495	FALSE	0	TUBB4A	5916	0.328395
16091	4.94479	0.00304542	0.202233	0.777778	9	10	FALSE	TMEM216	9.66667	9	0	0	0.671268	FALSE	0	TMEM216	2382	0.439394
16405	5.59524	0.00247139	0.178723	0.583333	9	10	FALSE	APOH	13	9	0	0	0.617063	FALSE	0	APOH	5176	0.333333
16436	5.62302	0.00798568	0.177841	0.638889	9	10	FALSE	HGF	12.3333	9	0	0	0.614749	FALSE	0	HGF	5298	0.359477
16452	5.5754	0.016436	0.179359	0.416667	9	10	FALSE	PROS1	12.4444	9	0	0	0.618717	FALSE	0	PROS1	18858	0.300813
16610	4.6044	0.0395191	0.217184	0.194444	9	7	FALSE	HSD3B1	5.11111	9	0	0	0.599512	FALSE	0	HSD3B1	6230	0.294118
16624	3.82418	0.326303	0.261494	0.222222	9	6	FALSE	HSD17B6	6.44444	9	0	0	0.686203	FALSE	0	HSD17B6	38406	0.235043
16672	3.43956	0.119752	0.290735	0.194444	9	5	FALSE	CYP1A2	6.55556	9	0	0	0.728938	FALSE	0	CYP1A2	5682	0.322222
17833	4.76923	0.00262132	0.209677	0.388889	9	9	FALSE	SOD2	5.44444	9	0	0	0.581197	FALSE	0	SOD2	128	0.418803
17966	4.81356	0.00166642	0.207746	0.583333	9	10	FALSE	INO80	12.6667	9	0	0	0.682203	FALSE	0	INO80	7404	0.408602
17990	4.82486	0	0.20726	1	9	10	FALSE	MORF4L2	15.5556	9	0	0	0.681262	FALSE	0	MORF4L2	0	0.536398
168	2.62273	3.759e-05	0.381283	0.964286	8	4	FALSE	THOC3	26.5	8	0	0	0.675455	FALSE	0	THOC3	68	0.288043
353	2.63182	2.69e-06	0.379965	0.964286	8	5	FALSE	CWC27	66.5	8	0	0	0.673636	FALSE	0	CWC27	14	0.610092
536	2.46364	0.00013307	0.405904	0.464286	8	4	FALSE	PRPF38A	42.375	8	0	0	0.707273	FALSE	0	PRPF38A	144	0.344512
566	3.05455	6.604e-05	0.327381	0.964286	8	5	FALSE	CSTF1	12.75	8	0	0	0.589091	FALSE	0	CSTF1	94	0.472222
680	2.41364	0.00256267	0.414313	0.392857	8	4	FALSE	PABPN1	37.25	8	0	0	0.717273	FALSE	0	PABPN1	1538	0.291016
1438	2.34091	0.00010459	0.427184	0.642857	8	4	FALSE	PUF60	62.25	8	0	0	0.731818	FALSE	0	PUF60	112	0.4375
3621	3.48561	0.00013051	0.286894	0.607143	8	6	FALSE	SSR4	9	8	0	0	0.585731	FALSE	0	SSR4	62	0.529412
4571	3.1295	4.196e-05	0.31954	0.857143	8	5	FALSE	UPF3A	17.5	8	0	0	0.645084	FALSE	0	UPF3A	138	0.307018
11318	3.10432	0.0108528	0.322132	0.428571	8	5	FALSE	SEC11A	12.5	8	0	0	0.649281	FALSE	0	SEC11A	59150	0.227273
11331	3.10432	0.0108528	0.322132	0.428571	8	5	FALSE	SEC11C	12.5	8	0	0	0.649281	FALSE	0	SEC11C	59150	0.227273
11488	4.50397	0.00108363	0.222026	0.642857	8	8	FALSE	CCR1	18.125	8	0	0	0.708003	FALSE	0	CCR1	1780	0.580645
11601	5.29365	0.0423901	0.188906	0.107143	8	9	FALSE	POMC	5	8	0	0	0.642196	FALSE	0	POMC	17964	0.1875
11717	5.29365	0.00177202	0.188906	0.714286	8	10	FALSE	GNG10	16	8	0	0	0.642196	FALSE	0	GNG10	7832	0.551724
11747	5.63889	0.00126692	0.17734	0.5	8	10	FALSE	GNG3	14.625	8	0	0	0.613426	FALSE	0	GNG3	5080	0.5
12052	3.11864	0.0241974	0.320652	0.571429	8	7	FALSE	PTTG1	22.75	8	0	0	0.823446	FALSE	0	PTTG1	18298	0.27259
12341	3.89831	0.00082634	0.256522	0.642857	8	9	FALSE	UBA1	15.375	8	0	0	0.758475	FALSE	0	UBA1	230	0.320312
13387	4.41104	0.0207439	0.226704	0.607143	8	9	FALSE	DCTN4	8.625	8	0	0	0.715746	FALSE	0	DCTN4	16668	0.369565
13426	5.30675	1.082e-05	0.188439	0.964286	8	10	FALSE	ARCN1	14.5	8	0	0	0.641104	FALSE	0	ARCN1	2	0.467742
13465	4.59509	0.0165852	0.217623	0.214286	8	9	FALSE	KDELR1	13.375	8	0	0	0.700409	FALSE	0	KDELR1	3760	0.2675
13472	5.30061	8.361e-05	0.188657	0.785714	8	10	FALSE	ARF5	15.25	8	0	0	0.641616	FALSE	0	ARF5	20	0.476562
13476	4	0.227823	0.25	0.535714	8	8	FALSE	ARF3	14.125	8	0	0	0.75	FALSE	0	ARF3	125966	0.358974
13539	5.41718	0.0003274	0.184598	0.678571	8	10	FALSE	GOLGA2	11.5	8	0	0	0.631902	FALSE	0	GOLGA2	58	0.479167
13560	3.90184	1.082e-05	0.256289	0.964286	8	7	FALSE	RACGAP1	9.125	8	0	0	0.75818	FALSE	0	RACGAP1	2	0.608333
13564	3.90184	1.082e-05	0.256289	0.964286	8	7	FALSE	KIF20A	9.125	8	0	0	0.75818	FALSE	0	KIF20A	2	0.608333
13566	3.90184	1.082e-05	0.256289	0.964286	8	7	FALSE	KIF15	9.125	8	0	0	0.75818	FALSE	0	KIF15	2	0.608333
13589	5.31288	0.00074747	0.188222	0.892857	8	10	FALSE	COG2	12	8	0	0	0.640593	FALSE	0	COG2	1540	0.375
13709	3.89571	0.0256225	0.256693	0.142857	8	8	FALSE	KIF5B	9.125	8	0	0	0.758691	FALSE	0	KIF5B	7308	0.273438
13914	5.2381	0.0139046	0.190909	0	8	9	FALSE	GNA11	3.25	8	0	0	0.646825	FALSE	0	GNA11	19956	0.321429
14094	5.24603	0.0116123	0.19062	0.5	8	9	FALSE	KISS1	8.625	8	0	0	0.646164	FALSE	0	KISS1	8458	0.303571
14541	2.3253	0.00812937	0.430052	0.678571	8	4	FALSE	CLTA	18.75	8	0	0	0.779116	FALSE	0	CLTA	470	0.360577
14558	2.50602	0.0170802	0.399038	0.464286	8	5	FALSE	CTTN	13.5	8	0	0	0.748996	FALSE	0	CTTN	840	0.342949
14562	3.20482	0.00014973	0.31203	0.892857	8	6	FALSE	ARPC4	10.25	8	0	0	0.63253	FALSE	0	ARPC4	6	0.602941
14604	2.60241	0.00455666	0.384259	0.5	8	5	FALSE	SH3GL2	11.375	8	0	0	0.732932	FALSE	0	SH3GL2	250	0.344697
14618	2.68675	0.0186984	0.372197	0.5	8	4	FALSE	AP1G1	11.25	8	0	0	0.718876	FALSE	0	AP1G1	690	0.317857
14620	2.68675	0.0107577	0.372197	0.428571	8	4	FALSE	AP1M1	11.125	8	0	0	0.718876	FALSE	0	AP1M1	334	0.323529
15719	1.875	7.215e-05	0.533333	0.964286	8	3	FALSE	NDUFAF6	30.875	8	0	0	0.708333	FALSE	0	NDUFAF6	2	0.561364
16140	4.17791	0.00647903	0.239354	0.714286	8	9	FALSE	CENPJ	11.625	8	0	0	0.735174	FALSE	0	CENPJ	2846	0.290625
16172	4.31288	0.00238059	0.231863	0.607143	8	9	FALSE	NEDD1	11	8	0	0	0.723926	FALSE	0	NEDD1	1040	0.3625
16238	4.35583	0.00350453	0.229577	0.571429	8	9	FALSE	HAUS6	8.375	8	0	0	0.720348	FALSE	0	HAUS6	1520	0.322115
16409	5.59524	0.0007908	0.178723	0.607143	8	10	FALSE	HRG	15.125	8	0	0	0.617063	FALSE	0	HRG	218	0.368902
16426	5.60317	6.516e-05	0.17847	0.892857	8	10	FALSE	TIMP1	16	8	0	0	0.616402	FALSE	0	TIMP1	44	0.410256
16471	5.59524	0.00526337	0.178723	0.428571	8	10	FALSE	SERPINC1	11.5	8	0	0	0.617063	FALSE	0	SERPINC1	13744	0.2875
16618	4.61538	0.0280734	0.216667	0.214286	8	7	FALSE	HSD3B2	5.25	8	0	0	0.598291	FALSE	0	HSD3B2	4980	0.3125
16683	3.98901	0.0127409	0.250689	0.0714286	8	6	FALSE	UGT2B7	6.125	8	0	0	0.667888	FALSE	0	UGT2B7	846	0.34375
17835	4.78022	0.00259079	0.209195	0.25	8	9	FALSE	SOD1	5.25	8	0	0	0.579976	FALSE	0	SOD1	126	0.403846
17837	4.78022	0.00259079	0.209195	0.25	8	9	FALSE	SOD3	5.25	8	0	0	0.579976	FALSE	0	SOD3	126	0.403846
359	2.66818	4.96e-06	0.374787	0.952381	7	4	FALSE	CASC3	26.7143	7	0	0	0.666364	FALSE	0	CASC3	4	0.333929
545	2.91818	0.00019222	0.342679	0.904762	7	4	FALSE	FYTTD1	19.8571	7	0	0	0.616364	FALSE	0	FYTTD1	308	0.405248
557	3.01364	0.00066153	0.331825	0.571429	7	4	FALSE	SARNP	15.8571	7	0	0	0.597273	FALSE	0	SARNP	246	0.392857
947	2.40909	0.00030443	0.415094	0.619048	7	4	FALSE	SUGP1	53.8571	7	0	0	0.718182	FALSE	0	SUGP1	422	0.411123
1780	2.59545	5.04e-06	0.385289	0.904762	7	5	FALSE	PPIH	60	7	0	0	0.680909	FALSE	0	PPIH	10	0.530973
2069	3.64091	1.42e-05	0.274657	0.809524	7	5	FALSE	POM121	19	7	0	0	0.471818	FALSE	0	POM121	8	0.703704
3605	3.08993	1.964e-05	0.323632	0.857143	7	5	FALSE	RPN1	21.4286	7	0	0	0.651679	FALSE	0	RPN1	42	0.363196
3617	3.09353	0.00041318	0.323256	0.761905	7	5	FALSE	RPN2	21.2857	7	0	0	0.651079	FALSE	0	RPN2	2948	0.366995
4565	3.13309	2.891e-05	0.319173	0.952381	7	5	FALSE	SMG1	17.2857	7	0	0	0.644484	FALSE	0	SMG1	132	0.303258
11490	4.5119	0.00113088	0.221636	0.714286	7	8	FALSE	CCR3	20	7	0	0	0.707341	FALSE	0	CCR3	2060	0.661905
11502	4.96429	1.947e-05	0.201439	0.857143	7	9	FALSE	CXCL3	16.5714	7	0	0	0.669643	FALSE	0	CXCL3	12	0.591837
11510	4.48413	1.947e-05	0.223009	0.857143	7	8	FALSE	CXCL5	20	7	0	0	0.709656	FALSE	0	CXCL5	12	0.645161
11554	4.21429	0.0263411	0.237288	0.666667	7	8	FALSE	PPBP	17.5714	7	0	0	0.732143	FALSE	0	PPBP	33588	0.418367
11711	5.29762	0.0015503	0.188764	0.571429	7	10	FALSE	GNG5	16	7	0	0	0.641865	FALSE	0	GNG5	4600	0.566327
11719	5.29762	0.0015503	0.188764	0.571429	7	10	FALSE	GNG7	16	7	0	0	0.641865	FALSE	0	GNG7	4600	0.566327
12152	3.78531	7.167e-05	0.264179	0.809524	7	8	FALSE	AURKA	17	7	0	0	0.767891	FALSE	0	AURKA	28	0.485714
12169	5.73446	0.0338887	0.174384	0.238095	7	11	FALSE	AXIN1	2.85714	7	0	0	0.605461	FALSE	0	AXIN1	135910	0.301587
12222	3.80791	0.0061108	0.262611	0.571429	7	8	FALSE	CDC6	10.5714	7	0	0	0.766008	FALSE	0	CDC6	3006	0.422857
12234	3.67797	0.00031009	0.271889	0.857143	7	8	FALSE	CCNE1	15	7	0	0	0.776836	FALSE	0	CCNE1	128	0.416667
12239	3.62147	0.00024736	0.276131	0.666667	7	8	FALSE	CKS1B	20.2857	7	0	0	0.781544	FALSE	0	CKS1B	148	0.450794
12255	3.9209	0.0804325	0.255043	0.714286	7	9	FALSE	CCND1	14.7143	7	0	0	0.756591	FALSE	0	CCND1	310888	0.416327
13385	3.85276	0.00328768	0.259554	0.857143	7	8	FALSE	DCTN6	12	7	0	0	0.76227	FALSE	0	DCTN6	3476	0.342857
13427	5.31288	0	0.188222	1	7	10	FALSE	COPZ2	15.4286	7	0	0	0.640593	FALSE	0	COPZ2	0	0.497696
13457	5.34969	0.030439	0.186927	0.238095	7	10	FALSE	TMED2	7.57143	7	0	0	0.637526	FALSE	0	TMED2	3708	0.218487
13570	3.90798	0	0.255887	1	7	7	FALSE	KIF4A	9.28571	7	0	0	0.757669	FALSE	0	KIF4A	0	0.619048
13593	6.08589	0	0.164315	1	7	11	FALSE	COG8	10.5714	7	0	0	0.576176	FALSE	0	COG8	0	0.621849
13672	5.27607	0.0203379	0.189535	0.285714	7	10	FALSE	TMED10	9.57143	7	0	0	0.643661	FALSE	0	TMED10	7750	0.299107
13716	3.66871	0.0273814	0.272575	0.238095	7	8	FALSE	KIF5A	11.1429	7	0	0	0.777607	FALSE	0	KIF5A	5674	0.278571
13720	3.90798	0.00929906	0.255887	0.428571	7	8	FALSE	KIF3C	11.1429	7	0	0	0.757669	FALSE	0	KIF3C	4430	0.327731
13811	4.53374	0.00051137	0.220568	0.428571	7	9	FALSE	KLC2	7.14286	7	0	0	0.705521	FALSE	0	KLC2	56	0.446429
14100	6.10317	0.0159484	0.163849	0.47619	7	10	FALSE	KISS1R	6.85714	7	0	0	0.574735	FALSE	0	KISS1R	29706	0.373016
14198	3.86275	0.102586	0.258883	0.380952	7	6	FALSE	B2M	4.57143	7	0	0	0.642157	FALSE	0	B2M	1862	0.326531
14199	4.58824	0.0954313	0.217949	0.285714	7	7	FALSE	HLA-C	3.85714	7	0	0	0.551471	FALSE	0	HLA-C	1712	0.396825
14203	3.86275	0.102586	0.258883	0.380952	7	6	FALSE	LILRB1	4.57143	7	0	0	0.642157	FALSE	0	LILRB1	1862	0.326531
14246	3.05882	0.007864	0.326923	0.52381	7	7	FALSE	GBP1	16.8571	7	0	0	0.742647	FALSE	0	GBP1	188	0.561905
14522	2.75904	0.00061122	0.362445	0.761905	7	4	FALSE	AP2S1	16	7	0	0	0.706827	FALSE	0	AP2S1	26	0.470588
14539	2.3012	0.0392132	0.434555	0.333333	7	4	FALSE	DAB2	15.8571	7	0	0	0.783133	FALSE	0	DAB2	1222	0.293801
14543	3.21687	4.198e-05	0.310861	0.952381	7	6	FALSE	ARPC5L	10.7143	7	0	0	0.630522	FALSE	0	ARPC5L	2	0.630252
14553	3.21687	4.198e-05	0.310861	0.952381	7	6	FALSE	ARPC4-TTLL3	10.8571	7	0	0	0.630522	FALSE	0	ARPC4-TTLL3	2	0.638655
14622	2.81928	0.00110113	0.354701	0.571429	7	4	FALSE	AP1S1	13	7	0	0	0.696787	FALSE	0	AP1S1	52	0.419355
14708	2.48193	0.0105657	0.402913	0.52381	7	5	FALSE	STON2	17.4286	7	0	0	0.753012	FALSE	0	STON2	502	0.421603
14825	2.79518	0.0546635	0.357759	0.0476191	7	5	FALSE	SYT1	6.71429	7	0	0	0.700803	FALSE	0	SYT1	1742	0.230769
16079	4.71166	0.00518412	0.21224	0.714286	7	10	FALSE	AHI1	11	7	0	0	0.690695	FALSE	0	AHI1	1116	0.417582
16095	4.15951	0.0228712	0.240413	0.333333	7	9	FALSE	OFD1	8.42857	7	0	0	0.736708	FALSE	0	OFD1	3546	0.258929
16097	5.64417	0.00238852	0.177174	0.666667	7	11	FALSE	B9D1	8.71429	7	0	0	0.612986	FALSE	0	B9D1	358	0.504202
16104	4.76074	0.0110636	0.210052	0.333333	7	10	FALSE	CEP97	9.57143	7	0	0	0.686605	FALSE	0	CEP97	5744	0.277311
16106	5.82822	4.292e-05	0.171579	0.857143	7	11	FALSE	TCTN1	8.71429	7	0	0	0.597648	FALSE	0	TCTN1	6	0.67033
16119	4.96933	0.00174498	0.201235	0.904762	7	10	FALSE	MKS1	10.7143	7	0	0	0.669223	FALSE	0	MKS1	1208	0.510204
16136	4.82209	0.00057989	0.207379	0.761905	7	10	FALSE	CEP152	10	7	0	0	0.681493	FALSE	0	CEP152	66	0.384615
16174	4.36196	0.00474818	0.229255	0.619048	7	9	FALSE	HAUS2	8	7	0	0	0.719836	FALSE	0	HAUS2	2342	0.314286
16258	4.31902	0.00028881	0.231534	0.809524	7	9	FALSE	TUBGCP4	12.2857	7	0	0	0.723415	FALSE	0	TUBGCP4	92	0.396313
16379	5.61111	0.00235412	0.178218	0.47619	7	10	FALSE	SERPINA1	13.7143	7	0	0	0.615741	FALSE	0	SERPINA1	5128	0.360902
16454	5.5873	0.0146181	0.178977	0.428571	7	10	FALSE	F8	13.2857	7	0	0	0.617725	FALSE	0	F8	36916	0.328571
16668	3	0.15673	0.333333	0.0952381	7	5	FALSE	UGT1A4	7.85714	7	0	0	0.777778	FALSE	0	UGT1A4	17342	0.31677
17988	4.85876	0.00115735	0.205814	0.761905	7	10	FALSE	ACTR5	11.7143	7	0	0	0.678437	FALSE	0	ACTR5	7298	0.468571
17994	4.85876	0.00012338	0.205814	0.761905	7	10	FALSE	ACTR8	11.8571	7	0	0	0.678437	FALSE	0	ACTR8	20	0.474286
541	3.09091	0	0.323529	1	6	4	FALSE	CHTOP	16.6667	6	0	0	0.581818	FALSE	0	CHTOP	0	0.505051
693	2.54091	0.00036192	0.39356	0.266667	6	4	FALSE	WBP11	28.8333	6	0	0	0.691818	FALSE	0	WBP11	220	0.251462
982	2.58182	8.099e-05	0.387324	0.6	6	5	FALSE	RBM17	48.3333	6	0	0	0.683636	FALSE	0	RBM17	66	0.413105
998	2.40455	0.0002258	0.415879	0.466667	6	4	FALSE	RBM5	59	6	0	0	0.719091	FALSE	0	RBM5	186	0.423261
1697	3.08636	8.3e-06	0.324006	0.933333	6	5	FALSE	NUTF2	22.8333	6	0	0	0.582727	FALSE	0	NUTF2	2	0.556911
1925	2.98182	9.186e-05	0.335366	0.6	6	4	FALSE	ZC3H11A	15.5	6	0	0	0.603636	FALSE	0	ZC3H11A	190	0.425926
4562	3.2518	0	0.307522	1	6	5	FALSE	SMG8	14.3333	6	0	0	0.6247	FALSE	0	SMG8	0	0.409524
11427	3.94841	0.0587206	0.253266	0.466667	6	7	FALSE	AGT	8.33333	6	0	0	0.754299	FALSE	0	AGT	25928	0.252525
11823	6.17063	0.00013905	0.162058	0.0666667	6	11	FALSE	GNB5	10.8333	6	0	0	0.569114	FALSE	0	GNB5	76	0.508333
11878	5.39683	0.00139593	0.185294	0.0666667	6	9	FALSE	PYY	4.66667	6	0	0	0.633598	FALSE	0	PYY	220	0.25
12071	3.62147	0.00020949	0.276131	0.8	6	8	FALSE	FBXO5	22.8333	6	0	0	0.781544	FALSE	0	FBXO5	102	0.496377
12346	3.9661	0.00944404	0.252137	0.666667	6	9	FALSE	UBE2E1	15.3333	6	0	0	0.752825	FALSE	0	UBE2E1	120696	0.388889
12354	3.9774	0.0115798	0.25142	0.4	6	9	FALSE	NFKBIA	11.5	6	0	0	0.751883	FALSE	0	NFKBIA	1678	0.319444
12389	3.33898	0	0.299492	1	6	7	FALSE	MYSM1	48.8333	6	0	0	0.805085	FALSE	0	MYSM1	0	0.856725
13393	3.8589	0.00214507	0.259141	0.933333	6	8	FALSE	DCTN5	13.3333	6	0	0	0.761759	FALSE	0	DCTN5	2604	0.380952
13549	4.15337	0.0172136	0.240768	0.533333	6	8	FALSE	RINT1	8	6	0	0	0.737219	FALSE	0	RINT1	4400	0.326389
13685	3.91411	0.00045178	0.255486	0.466667	6	8	FALSE	DYNC1I2	11.6667	6	0	0	0.757157	FALSE	0	DYNC1I2	106	0.364583
13689	3.91411	0.00045178	0.255486	0.466667	6	8	FALSE	DYNC1I1	11.6667	6	0	0	0.757157	FALSE	0	DYNC1I1	106	0.364583
13736	4.30061	0.00179702	0.232525	0.533333	6	8	FALSE	KIF3B	8.66667	6	0	0	0.724949	FALSE	0	KIF3B	1448	0.376812
13742	5.45399	0.0001275	0.183352	0.866667	6	10	FALSE	GOLGB1	12.5	6	0	0	0.628834	FALSE	0	GOLGB1	16	0.543478
13814	4.53988	0.00016789	0.22027	0.466667	6	9	FALSE	KLC4	7.83333	6	0	0	0.70501	FALSE	0	KLC4	24	0.489583
13926	4.11111	0.13018	0.243243	0.266667	6	8	FALSE	AGTR1	9.66667	6	0	0	0.740741	FALSE	0	AGTR1	131034	0.22619
13980	5.19048	0.00469008	0.192661	0.466667	6	9	FALSE	GHSR	11	6	0	0	0.650794	FALSE	0	GHSR	4152	0.349462
14092	6.11508	5.937e-05	0.16353	0.733333	6	10	FALSE	GNRH2	8	6	0	0	0.573743	FALSE	0	GNRH2	16	0.470588
14108	5.22619	0.00629549	0.191344	0.466667	6	9	FALSE	TACR3	11	6	0	0	0.647817	FALSE	0	TACR3	10330	0.373563
14320	3.52941	0	0.283333	1	6	8	FALSE	IFITM3	21	6	0	0	0.683824	FALSE	0	IFITM3	0	0.84
14551	3.22892	0	0.309701	1	6	6	FALSE	ACTR3B	11.1667	6	0	0	0.628514	FALSE	0	ACTR3B	0	0.656863
14586	3.09639	0.0218166	0.322957	0.0666667	6	6	FALSE	VAMP7	4.16667	6	0	0	0.650602	FALSE	0	VAMP7	574	0.233333
14614	2.80723	0.00061092	0.356223	0.666667	6	4	FALSE	AP1M2	12.8333	6	0	0	0.698795	FALSE	0	AP1M2	52	0.413978
14751	2.45783	0.00930439	0.406863	0.2	6	5	FALSE	BIN1	12.8333	6	0	0	0.757028	FALSE	0	BIN1	348	0.297619
14760	2.55422	0.0321674	0.391509	0.266667	6	5	FALSE	EGFR	10.8333	6	0	0	0.740964	FALSE	0	EGFR	854	0.280702
14843	2.50602	0.0169817	0.399038	0.533333	6	5	FALSE	TFRC	10.3333	6	0	0	0.748996	FALSE	0	TFRC	650	0.258333
15739	1.91071	0.00010823	0.523364	0.866667	6	3	FALSE	NUBPL	43.8333	6	0	0	0.696429	FALSE	0	NUBPL	4	0.79697
16098	5.13497	0.00205927	0.194743	0.866667	6	10	FALSE	B9D2	9.33333	6	0	0	0.655419	FALSE	0	B9D2	1962	0.666667
16143	4.84663	0.00096419	0.206329	0.6	6	10	FALSE	CDK5RAP2	9.66667	6	0	0	0.679448	FALSE	0	CDK5RAP2	108	0.38
16225	3.71166	0.0535109	0.269421	0.2	6	8	FALSE	PAFAH1B1	10.5	6	0	0	0.774029	FALSE	0	PAFAH1B1	7482	0.25
16233	4.3681	0.00288847	0.228933	0.866667	6	9	FALSE	HAUS1	9	6	0	0	0.719325	FALSE	0	HAUS1	1408	0.346154
16236	4.3681	0.00288847	0.228933	0.866667	6	9	FALSE	HAUS4	9	6	0	0	0.719325	FALSE	0	HAUS4	1408	0.346154
16285	4.33129	0	0.230878	1	6	9	FALSE	TUBGCP5	13.1667	6	0	0	0.722393	FALSE	0	TUBGCP5	0	0.438889
16374	5.63095	0.007971	0.17759	0.466667	6	10	FALSE	A2M	12.5	6	0	0	0.614087	FALSE	0	A2M	5146	0.373737
16415	5.64286	0.00088386	0.177215	0.8	6	10	FALSE	ORM1	11.8333	6	0	0	0.613095	FALSE	0	ORM1	2494	0.358586
16467	6.52381	0.00535332	0.153285	0.2	6	11	FALSE	F10	5	6	0	0	0.539683	FALSE	0	F10	18648	0.388889
16473	5.63889	0.0115471	0.17734	0.333333	6	10	FALSE	F5	9.5	6	0	0	0.613426	FALSE	0	F5	12760	0.287879
16614	5.49451	0.0238095	0.182	0.266667	6	8	FALSE	SRD5A1	4.33333	6	0	0	0.50061	FALSE	0	SRD5A1	2556	0.378788
16647	5.43956	0.0203497	0.183838	0.333333	6	8	FALSE	HSD17B3	6	6	0	0	0.506716	FALSE	0	HSD17B3	4926	0.388889
16653	4.64835	0.0548291	0.21513	0.266667	6	7	FALSE	CYP19A1	5.83333	6	0	0	0.594628	FALSE	0	CYP19A1	6118	0.366667
16768	2.96763	0	0.33697	1	6	5	FALSE	RIOK1	48.8333	6	0	0	0.672062	FALSE	0	RIOK1	0	0.751282
16920	2.79137	0	0.358247	1	6	5	FALSE	NOL11	53.1667	6	0	0	0.701439	FALSE	0	NOL11	0	0.604167
17305	3.30216	0.00038211	0.302832	0.533333	6	6	FALSE	WDR18	14	6	0	0	0.616307	FALSE	0	WDR18	898	0.288194
17774	4.59341	0.0213879	0.217703	0.0666667	6	8	FALSE	ALDH3A1	3.66667	6	0	0	0.600733	FALSE	0	ALDH3A1	4396	0.6
17776	4.59341	0.0213879	0.217703	0.0666667	6	8	FALSE	ALDH3B2	3.66667	6	0	0	0.600733	FALSE	0	ALDH3B2	4396	0.6
17780	4.59341	0.0213879	0.217703	0.0666667	6	8	FALSE	ALDH1A3	3.66667	6	0	0	0.600733	FALSE	0	ALDH1A3	4396	0.6
17808	3.45055	0.00665725	0.289809	0.666667	6	7	FALSE	EPHX1	8.33333	6	0	0	0.727717	FALSE	0	EPHX1	788	0.297619
17832	4	0.0315759	0.25	0.2	6	8	FALSE	GPX1	9.66667	6	0	0	0.666667	FALSE	0	GPX1	2672	0.365385
18015	4.85311	0	0.206054	1	6	10	FALSE	BRD8	17.1667	6	0	0	0.678908	FALSE	0	BRD8	0	0.635802
532	2.7	3.788e-05	0.37037	0.6	5	5	FALSE	SNRNP27	47.2	5	0	0	0.66	FALSE	0	SNRNP27	26	0.476768
1030	2.69545	7.42e-06	0.370995	0.7	5	5	FALSE	GPKOW	48.2	5	0	0	0.660909	FALSE	0	GPKOW	6	0.491837
1218	2.53636	4.004e-05	0.394265	0.4	5	4	FALSE	FUS	50.8	5	0	0	0.692727	FALSE	0	FUS	52	0.436207
1693	3.09091	0	0.323529	1	5	5	FALSE	KPNA2	23.8	5	0	0	0.581818	FALSE	0	KPNA2	0	0.580488
2633	2.54545	7.67e-06	0.392857	0.6	5	4	FALSE	SMNDC1	58	5	0	0	0.690909	FALSE	0	SMNDC1	10	0.495727
4139	3.14388	0	0.318078	1	5	5	FALSE	EIF4H	26.8	5	0	0	0.642686	FALSE	0	EIF4H	0	0.478571
5182	2.95324	0.00174412	0.338611	0.7	5	5	FALSE	LAS1L	18.6	5	0	0	0.67446	FALSE	0	LAS1L	6618	0.315254
11367	3.31655	0	0.301518	1	5	6	FALSE	SRP72	9.8	5	0	0	0.613909	FALSE	0	SRP72	0	0.35
11369	3.31655	0	0.301518	1	5	6	FALSE	SRP68	9.8	5	0	0	0.613909	FALSE	0	SRP68	0	0.35
11371	3.31655	0	0.301518	1	5	6	FALSE	SRP19	9.8	5	0	0	0.613909	FALSE	0	SRP19	0	0.35
11374	3.31655	0	0.301518	1	5	6	FALSE	SRP9	9.8	5	0	0	0.613909	FALSE	0	SRP9	0	0.35
11456	5.06746	0.0389104	0.197338	0.2	5	10	FALSE	C5AR1	8.2	5	0	0	0.661045	FALSE	0	C5AR1	17526	0.307692
11487	5.03175	0.00061095	0.198738	0	5	9	FALSE	CCL2	10.8	5	0	0	0.664021	FALSE	0	CCL2	1220	0.7
11833	6.55159	0.00043309	0.152635	0	5	11	FALSE	PDE6G	8.6	5	0	0	0.537368	FALSE	0	PDE6G	308	0.475
11856	5.18651	0.0294772	0.192808	0	5	9	FALSE	NMU	6.2	5	0	0	0.651124	FALSE	0	NMU	9506	0.236364
12170	4.81356	0.0705096	0.207746	0.4	5	10	FALSE	GSK3B	4.8	5	0	0	0.682203	FALSE	0	GSK3B	272084	0.306667
12220	3.81921	0.00534635	0.261834	0.6	5	8	FALSE	ORC1	11.6	5	0	0	0.765066	FALSE	0	ORC1	2770	0.464
12396	3.71751	0.015987	0.268997	0.3	5	8	FALSE	NFKB1	12.6	5	0	0	0.77354	FALSE	0	NFKB1	22316	0.225926
13382	4.44172	0	0.225138	1	5	9	FALSE	ACTR10	10.8	5	0	0	0.71319	FALSE	0	ACTR10	0	0.490909
13577	3.61963	0.213995	0.276271	0.6	5	7	FALSE	ZW10	8.6	5	0	0	0.781697	FALSE	0	ZW10	68506	0.365217
13643	5.43558	0.00110087	0.183973	0.2	5	10	FALSE	SURF4	7.6	5	0	0	0.630368	FALSE	0	SURF4	94	0.313043
13809	4.79141	9.341e-05	0.208707	0.6	5	9	FALSE	KIFAP3	8	5	0	0	0.684049	FALSE	0	KIFAP3	14	0.533333
13925	4.74603	0.022328	0.210702	0.1	5	9	FALSE	ADRBK1	6	5	0	0	0.687831	FALSE	0	ADRBK1	15760	0.216
13940	4.73016	0.0223355	0.211409	0.1	5	8	FALSE	EDNRB	5.6	5	0	0	0.689153	FALSE	0	EDNRB	14786	0.294118
13990	6.0119	0.00794441	0.166337	0.5	5	10	FALSE	MLN	8.4	5	0	0	0.582341	FALSE	0	MLN	24574	0.482353
14097	6.12302	0.00802065	0.163318	0.2	5	10	FALSE	PROK2	6.2	5	0	0	0.573082	FALSE	0	PROK2	11440	0.414286
14102	5.71429	0.00117521	0.175	0.7	5	10	FALSE	GNRHR	9.4	5	0	0	0.607143	FALSE	0	GNRHR	2172	0.408696
14150	4.46825	0.00609009	0.223801	0.8	5	8	FALSE	TACR1	15.4	5	0	0	0.710979	FALSE	0	TACR1	9890	0.405263
14209	3.27451	0.273444	0.305389	0.2	5	5	FALSE	HLA-G	4.8	5	0	0	0.715686	FALSE	0	HLA-G	4180	0.353846
14257	3.07843	0.00632545	0.324841	0.5	5	7	FALSE	GBP2	17.8	5	0	0	0.740196	FALSE	0	GBP2	160	0.586667
14282	2.80392	0.353486	0.356643	0.3	5	4	FALSE	HLA-DRB1	4	5	0	0	0.77451	FALSE	0	HLA-DRB1	4586	0.292308
14583	2.44578	0.0270875	0.408867	0.2	5	5	FALSE	AGFG1	10.6	5	0	0	0.759036	FALSE	0	AGFG1	634	0.237209
14629	2.91566	0.00011767	0.342975	0.8	5	4	FALSE	AP1S2	11.4	5	0	0	0.680723	FALSE	0	AP1S2	6	0.422222
14640	2.95181	0.00872103	0.338776	0.4	5	5	FALSE	TGOLN2	6.6	5	0	0	0.674699	FALSE	0	TGOLN2	314	0.32
14749	2.84337	0.0169278	0.351695	0.3	5	5	FALSE	SH3GL1	9.2	5	0	0	0.692771	FALSE	0	SH3GL1	624	0.325926
14765	3.13253	0.00266459	0.319231	0.5	5	6	FALSE	TF	6.2	5	0	0	0.644578	FALSE	0	TF	62	0.364706
14778	2.6747	8.434e-05	0.373874	0.9	5	4	FALSE	PIK3C2A	20.4	5	0	0	0.720884	FALSE	0	PIK3C2A	8	0.536842
14887	3.13253	0.00491068	0.319231	0.6	5	6	FALSE	M6PR	6	5	0	0	0.644578	FALSE	0	M6PR	200	0.4
16177	4.95706	0.0126163	0.201733	0.3	5	10	FALSE	NEK2	5	5	0	0	0.670245	FALSE	0	NEK2	3186	0.306667
16214	4.44785	7.713e-05	0.224828	0.5	5	9	FALSE	TUBG2	12.2	5	0	0	0.712679	FALSE	0	TUBG2	18	0.61
16242	4.37423	0	0.228611	1	5	9	FALSE	HAUS5	10.2	5	0	0	0.718814	FALSE	0	HAUS5	0	0.392308
16417	6.51587	2.213e-05	0.153471	0.8	5	11	FALSE	ORM2	9.2	5	0	0	0.540344	FALSE	0	ORM2	8	0.484211
16517	5.64286	0	0.177215	1	5	10	FALSE	SPARC	16.2	5	0	0	0.613095	FALSE	0	SPARC	0	0.476471
16608	5.47253	0.00163581	0.182731	0.4	5	8	FALSE	AKR1C3	6.4	5	0	0	0.503053	FALSE	0	AKR1C3	76	0.476923
16612	4.68132	0.0552555	0.213615	0.3	5	7	FALSE	AKR1D1	5	5	0	0	0.590965	FALSE	0	AKR1D1	6056	0.353846
16646	4.67033	0.0271395	0.214118	0.5	5	7	FALSE	CYP17A1	7.6	5	0	0	0.592186	FALSE	0	CYP17A1	4866	0.475
16662	3.43956	0.136026	0.290735	0	5	6	FALSE	CYP1A1	8	5	0	0	0.728938	FALSE	0	CYP1A1	19296	0.4375
16713	3.58242	0.00198869	0.279141	0.4	5	6	FALSE	CYP2C9	9.4	5	0	0	0.713065	FALSE	0	CYP2C9	546	0.494737
16914	3.31295	0	0.301846	1	5	6	FALSE	CSNK1E	41.2	5	0	0	0.614508	FALSE	0	CSNK1E	0	0.792308
17303	3.70144	1.731e-05	0.270165	0.8	5	6	FALSE	PELP1	8.4	5	0	0	0.54976	FALSE	0	PELP1	4	0.336
17778	3.7033	0.0811966	0.27003	0.3	5	7	FALSE	ADH1B	6.4	5	0	0	0.699634	FALSE	0	ADH1B	9470	0.3875
17806	3.62637	0.0106799	0.275758	0.5	5	7	FALSE	GSTP1	7.6	5	0	0	0.708181	FALSE	0	GSTP1	1356	0.411111
17810	3.62637	0.0137973	0.275758	0.6	5	7	FALSE	GSTM1	7.6	5	0	0	0.708181	FALSE	0	GSTM1	2012	0.4
17842	4.83516	0.00132251	0.206818	0.3	5	9	FALSE	GPX2	9	5	0	0	0.573871	FALSE	0	GPX2	74	0.529412
17848	4.83516	0.00132251	0.206818	0.3	5	9	FALSE	GPX3	9	5	0	0	0.573871	FALSE	0	GPX3	74	0.529412
17867	4.07692	0.0168211	0.245283	0.3	5	8	FALSE	GPX7	9.6	5	0	0	0.65812	FALSE	0	GPX7	2102	0.4
17885	4.16484	0.052017	0.240106	0.3	5	8	FALSE	GSTA1	5.4	5	0	0	0.648352	FALSE	0	GSTA1	2962	0.288889
17888	4.89011	0.00542187	0.204494	0.2	5	9	FALSE	GSTA4	4.4	5	0	0	0.567766	FALSE	0	GSTA4	122	0.381818
17898	4.18681	0.0105193	0.238845	0.6	5	8	FALSE	GSTM3	6.4	5	0	0	0.64591	FALSE	0	GSTM3	1440	0.376471
17905	4.1978	0.00881286	0.23822	0.6	5	8	FALSE	GSTM2	6.4	5	0	0	0.644689	FALSE	0	GSTM2	1414	0.4
17908	4.1978	0.00631519	0.23822	0.5	5	8	FALSE	GSTM5	6.4	5	0	0	0.644689	FALSE	0	GSTM5	776	0.413333
17916	4.07692	0.00522037	0.245283	0	5	8	FALSE	GSTT2B	6	5	0	0	0.65812	FALSE	0	GSTT2B	188	0.294118
72	3.43182	0	0.291391	1	4	5	FALSE	AAAS	26	4	0	0	0.513636	FALSE	0	AAAS	0	0.8125
367	2.58182	1.574e-05	0.387324	0.833333	4	4	FALSE	CCAR1	52.75	4	0	0	0.683636	FALSE	0	CCAR1	6	0.462719
1681	2.94091	0.00100861	0.340031	0.5	4	5	FALSE	HSPA4	12.5	4	0	0	0.611818	FALSE	0	HSPA4	362	0.290698
1718	3.43182	0	0.291391	1	4	5	FALSE	POM121C	23.5	4	0	0	0.513636	FALSE	0	POM121C	0	0.734375
5184	3.70504	0	0.269903	1	4	6	FALSE	NOL9	10	4	0	0	0.549161	FALSE	0	NOL9	0	0.4
11319	4.08633	3.25e-06	0.244718	0.833333	4	6	FALSE	SPCS2	6	4	0	0	0.485612	FALSE	0	SPCS2	2	0.666667
11322	4.08633	3.25e-06	0.244718	0.833333	4	6	FALSE	SPCS3	6	4	0	0	0.485612	FALSE	0	SPCS3	2	0.666667
11325	4.08633	3.25e-06	0.244718	0.833333	4	6	FALSE	SPCS1	6	4	0	0	0.485612	FALSE	0	SPCS1	2	0.666667
11418	6.59921	0.0041316	0.151533	0	4	11	FALSE	PDE6A	5.5	4	0	0	0.533399	FALSE	0	PDE6A	11668	0.346154
11420	6.61111	0.00399662	0.15126	0	4	11	FALSE	PDE6B	5	4	0	0	0.532407	FALSE	0	PDE6B	11622	0.363636
11436	4.67063	0.0321273	0.214104	0.166667	4	9	FALSE	FPR1	6	4	0	0	0.694114	FALSE	0	FPR1	11166	0.275
11453	6.04365	0.0158414	0.165463	0.166667	4	11	FALSE	C3	2.25	4	0	0	0.579696	FALSE	0	C3	6254	0.35
11541	4.52778	0.00793651	0.220859	0.5	4	8	FALSE	CXCR6	17.75	4	0	0	0.706019	FALSE	0	CXCR6	2614	0.603448
11633	4.97222	8.14e-06	0.201117	0.666667	4	9	FALSE	CXCL6	17.25	4	0	0	0.668981	FALSE	0	CXCL6	4	0.616071
11701	5.3373	0.00101885	0.187361	0.5	4	10	FALSE	GPSM1	14	4	0	0	0.638558	FALSE	0	GPSM1	4552	0.625
11792	6.18651	4.74e-06	0.161642	0.5	4	11	FALSE	GNG12	17.75	4	0	0	0.567791	FALSE	0	GNG12	6	0.806818
11849	5.16667	0.0109289	0.193548	0.166667	4	9	FALSE	PMCH	10.25	4	0	0	0.652778	FALSE	0	PMCH	4336	0.325
12174	5.76836	0.0112994	0.173359	0.5	4	11	FALSE	DVL1	4	4	0	0	0.602637	FALSE	0	DVL1	38876	0.46875
12191	3.56497	0.0161292	0.280507	0.166667	4	7	FALSE	TNF	14.75	4	0	0	0.786252	FALSE	0	TNF	10476	0.263889
12248	3.66102	8.881e-05	0.273148	0.666667	4	8	FALSE	CKS2	21.25	4	0	0	0.778249	FALSE	0	CKS2	56	0.505952
12282	4.32768	0.0167886	0.231071	0.5	4	9	FALSE	PPP2CB	9.5	4	0	0	0.722693	FALSE	0	PPP2CB	9294	0.296875
12348	4.0113	0	0.249296	1	4	9	FALSE	UBE2A	19.5	4	0	0	0.749058	FALSE	0	UBE2A	0	0.541667
12449	3.9209	0	0.255043	1	4	8	FALSE	PSMF1	44.75	4	0	0	0.756591	FALSE	0	PSMF1	0	0.952128
13547	4.89571	6.04e-05	0.204261	0.833333	4	9	FALSE	BNIP1	10	4	0	0	0.675358	FALSE	0	BNIP1	14	0.555556
13714	3.96933	9.392e-05	0.251932	0.666667	4	8	FALSE	DYNLL1	13.25	4	0	0	0.752556	FALSE	0	DYNLL1	48	0.473214
13745	5.50307	0	0.181717	1	4	10	FALSE	GORASP1	12	4	0	0	0.624744	FALSE	0	GORASP1	0	0.571429
13862	4.28834	0	0.23319	1	4	8	FALSE	NBAS	8.25	4	0	0	0.725971	FALSE	0	NBAS	0	0.589286
13971	5.38095	4.743e-05	0.185841	0.5	4	9	FALSE	NMB	5.25	4	0	0	0.634921	FALSE	0	NMB	6	0.35
13994	5.28175	0	0.189331	1	4	9	FALSE	CCKAR	15	4	0	0	0.643188	FALSE	0	CCKAR	0	0.535714
14017	5.11111	0.00681327	0.195652	0	4	9	FALSE	EDNRA	5.5	4	0	0	0.657407	FALSE	0	EDNRA	8156	0.3
14067	6.49206	6.324e-05	0.154034	0	4	11	FALSE	GNA14	3	4	0	0	0.542328	FALSE	0	GNA14	12	1
14088	6.12698	0.00789733	0.163212	0.333333	4	10	FALSE	PROKR2	7.25	4	0	0	0.572751	FALSE	0	PROKR2	12810	0.4375
14201	4.72549	0.00972597	0.211618	0.666667	4	7	FALSE	HLA-E	6	4	0	0	0.534314	FALSE	0	HLA-E	404	0.6
14207	3.98039	0.0500851	0.251232	0.5	4	6	FALSE	HLA-B	6.25	4	0	0	0.627451	FALSE	0	HLA-B	688	0.461538
14244	3.09804	0.0989922	0.322785	0.333333	4	4	FALSE	HLA-DRA	3.75	4	0	0	0.737745	FALSE	0	HLA-DRA	1168	0.388889
14254	3.58824	0.00061438	0.278689	0.5	4	8	FALSE	TRIM22	13	4	0	0	0.676471	FALSE	0	TRIM22	6	0.554348
14269	3.39216	0.13283	0.294798	0.166667	4	5	FALSE	HLA-DQA2	3.5	4	0	0	0.70098	FALSE	0	HLA-DQA2	1178	0.333333
14291	2.58824	0.348578	0.386364	0.333333	4	5	FALSE	TRIM21	14	4	0	0	0.801471	FALSE	0	TRIM21	4592	0.474138
14588	2.62651	0.0109968	0.380734	0	4	4	FALSE	RAB5B	9.75	4	0	0	0.728916	FALSE	0	RAB5B	242	0.291667
14606	2.56627	0	0.389671	1	4	5	FALSE	NECAP1	19.5	4	0	0	0.738956	FALSE	0	NECAP1	0	0.513158
14610	2.71084	0.00024173	0.368889	0.666667	4	4	FALSE	DNAJC6	17.5	4	0	0	0.714859	FALSE	0	DNAJC6	24	0.546875
14692	2.74699	0.0190964	0.364035	0.166667	4	4	FALSE	ARRB2	13.75	4	0	0	0.708835	FALSE	0	ARRB2	944	0.389706
14694	2.74699	0.0536749	0.364035	0.166667	4	4	FALSE	LDLRAP1	13.5	4	0	0	0.708835	FALSE	0	LDLRAP1	1368	0.382353
14698	2.74699	0.0190964	0.364035	0.166667	4	4	FALSE	ARRB1	13.75	4	0	0	0.708835	FALSE	0	ARRB1	944	0.389706
14827	2.6988	0.00178114	0.370536	0.333333	4	5	FALSE	SNX9	13.25	4	0	0	0.716867	FALSE	0	SNX9	130	0.464286
16073	4.07362	0.0124858	0.245482	0.5	4	9	FALSE	PCM1	13.75	4	0	0	0.743865	FALSE	0	PCM1	3058	0.321429
16149	4.94479	0	0.202233	1	4	10	FALSE	CEP63	8.25	4	0	0	0.671268	FALSE	0	CEP63	0	0.634615
16179	4.98773	6.875e-05	0.200492	0.833333	4	10	FALSE	IQCB1	10.75	4	0	0	0.667689	FALSE	0	IQCB1	12	0.511905
16184	5	0.00043623	0.2	0.666667	4	10	FALSE	SDCCAG8	10	4	0	0	0.666667	FALSE	0	SDCCAG8	40	0.47619
16210	4.92025	0.00090991	0.203242	0.5	4	10	FALSE	TPX2	8	4	0	0	0.673313	FALSE	0	TPX2	72	0.352273
16234	5.32515	0	0.187788	1	4	10	FALSE	HAUS3	6.75	4	0	0	0.639571	FALSE	0	HAUS3	0	0.75
16381	5.63492	0.00010407	0.177465	0.666667	4	10	FALSE	SERPINF2	17.25	4	0	0	0.613757	FALSE	0	SERPINF2	32	0.492857
16433	5.63095	0	0.17759	1	4	10	FALSE	IGF2	21.25	4	0	0	0.614087	FALSE	0	IGF2	0	0.590278
16477	6.52381	0.00039542	0.153285	0.5	4	11	FALSE	SERPIND1	9.75	4	0	0	0.539683	FALSE	0	SERPIND1	132	0.5
16488	6.55952	0.00304375	0.15245	0.166667	4	11	FALSE	PROC	4.5	4	0	0	0.536706	FALSE	0	PROC	11730	0.5
16607	5.48352	0.00061949	0.182365	0.666667	4	8	FALSE	AKR1C1	6.25	4	0	0	0.501831	FALSE	0	AKR1C1	36	0.446429
16635	4.71429	0.0103407	0.212121	0.333333	4	7	FALSE	CYP11B1	7.25	4	0	0	0.587302	FALSE	0	CYP11B1	1282	0.538462
16641	4.71429	0.0103407	0.212121	0.333333	4	7	FALSE	CYP11B2	7.25	4	0	0	0.587302	FALSE	0	CYP11B2	1282	0.538462
16666	4.06593	0.00552932	0.245946	0.166667	4	6	FALSE	UGT1A7	9	4	0	0	0.659341	FALSE	0	UGT1A7	644	0.53125
16690	3.85714	0.00198869	0.259259	0	4	6	FALSE	CYP2A6	8.75	4	0	0	0.68254	FALSE	0	CYP2A6	546	0.861111
17773	4.61538	0.0001221	0.216667	0.5	4	8	FALSE	ADH1A	5.75	4	0	0	0.598291	FALSE	0	ADH1A	6	0.638889
17786	3.71429	0.060928	0.269231	0	4	7	FALSE	ADH4	7	4	0	0	0.698413	FALSE	0	ADH4	8742	0.461538
17803	4.23077	8.325e-05	0.236364	0.833333	4	8	FALSE	CYP1B1	7.25	4	0	0	0.641026	FALSE	0	CYP1B1	4	0.517857
17822	4.05495	0.0152813	0.246612	0.5	4	8	FALSE	GGT1	9	4	0	0	0.660562	FALSE	0	GGT1	888	0.364583
17857	4.89011	0.00053262	0.204494	0.333333	4	9	FALSE	GPX5	8.75	4	0	0	0.567766	FALSE	0	GPX5	32	0.607143
17862	4.89011	0.00053262	0.204494	0.333333	4	9	FALSE	GPX6	8.75	4	0	0	0.567766	FALSE	0	GPX6	32	0.607143
17873	4.13187	0.0160312	0.242021	0.333333	4	8	FALSE	GPX8	9.5	4	0	0	0.652015	FALSE	0	GPX8	2060	0.4625
17881	4.05495	0.0130957	0.246612	0	4	8	FALSE	GSTO1	8.25	4	0	0	0.660562	FALSE	0	GSTO1	956	0.3625
17891	4.97802	0.00160067	0.200883	0.5	4	9	FALSE	GSTA2	3.75	4	0	0	0.557998	FALSE	0	GSTA2	56	0.416667
17900	5.02198	0.00045584	0.199125	0.666667	4	9	FALSE	GSTM4	5	4	0	0	0.553114	FALSE	0	GSTM4	10	0.5
18005	4.80791	0.00035954	0.207991	0.5	4	10	FALSE	YY1	13.75	4	0	0	0.682674	FALSE	0	YY1	78	0.375
128	2.77273	0	0.360656	1	3	4	FALSE	NXF2B	27.6667	3	0	0	0.645455	FALSE	0	NXF2B	0	0.461111
150	2.77273	0	0.360656	1	3	4	FALSE	NXF5	27.6667	3	0	0	0.645455	FALSE	0	NXF5	0	0.461111
156	2.77273	0	0.360656	1	3	4	FALSE	NXF3	27.6667	3	0	0	0.645455	FALSE	0	NXF3	0	0.461111
1678	3.17273	3.459e-05	0.315186	0.666667	3	5	FALSE	HSPA5	13.3333	3	0	0	0.565455	FALSE	0	HSPA5	4	0.380952
1806	2.56364	0	0.390071	1	3	5	FALSE	PRCC	88	3	0	0	0.687273	FALSE	0	PRCC	0	0.692913
2176	3.1	0	0.322581	1	3	5	FALSE	XPOT	29.6667	3	0	0	0.58	FALSE	0	XPOT	0	0.723577
11410	5	0	0.2	1	3	9	FALSE	ACKR3	22	3	0	0	0.666667	FALSE	0	ACKR3	0	0.758621
11422	5.72619	0.0130266	0.174636	0	3	10	FALSE	ADCY5	7.66667	3	0	0	0.606151	FALSE	0	ADCY5	11680	0.37037
11428	3.62698	0.355177	0.275711	0.333333	3	7	FALSE	AGTR2	16	3	0	0	0.781085	FALSE	0	AGTR2	165298	0.373016
11440	5.05159	0.00803684	0.197958	0	3	9	FALSE	APLN	9.33333	3	0	0	0.662368	FALSE	0	APLN	5056	0.641026
11598	5.4246	0.00017236	0.184345	0.666667	3	9	FALSE	CORT	7.33333	3	0	0	0.631283	FALSE	0	CORT	28	0.458333
11699	4.78175	0.140554	0.209129	0.333333	3	9	FALSE	LPAR2	17.3333	3	0	0	0.684855	FALSE	0	LPAR2	198418	0.459459
11783	6.19048	4.74e-06	0.161538	0	3	11	FALSE	PDCL	20	3	0	0	0.56746	FALSE	0	PDCL	6	1
11790	6.19048	4.74e-06	0.161538	0	3	11	FALSE	GNG8	20	3	0	0	0.56746	FALSE	0	GNG8	6	1
12176	5.77401	0	0.17319	1	3	11	FALSE	CSNK1A1	5.33333	3	0	0	0.602166	FALSE	0	CSNK1A1	0	0.592593
12180	5.0226	0.007055	0.1991	0.333333	3	10	FALSE	DVL3	4.66667	3	0	0	0.664783	FALSE	0	DVL3	25892	0.481481
12184	3.48023	0	0.287338	1	3	7	FALSE	BAP1	48.6667	3	0	0	0.793315	FALSE	0	BAP1	0	0.918239
12188	3.9209	0.00500751	0.255043	0.333333	3	8	FALSE	BIRC2	6	3	0	0	0.756591	FALSE	0	BIRC2	5124	0.377778
12288	4.33333	0.00558552	0.230769	0.666667	3	9	FALSE	PPP2R5E	12.3333	3	0	0	0.722222	FALSE	0	PPP2R5E	4646	0.385417
12372	4.81356	0.0113674	0.207746	0	3	10	FALSE	ITCH	6.33333	3	0	0	0.682203	FALSE	0	ITCH	129918	0.484848
12398	4.37853	0	0.228387	1	3	9	FALSE	NFKB2	4.66667	3	0	0	0.718456	FALSE	0	NFKB2	0	0.583333
12402	4.37853	0	0.228387	1	3	9	FALSE	NFKBIB	4.66667	3	0	0	0.718456	FALSE	0	NFKBIB	0	0.583333
12409	5.31073	3.21e-05	0.188298	0.666667	3	10	FALSE	PPP2R1B	3	3	0	0	0.640772	FALSE	0	PPP2R1B	2	0.75
13411	4.76074	0	0.210052	1	3	9	FALSE	DCTN3	10.6667	3	0	0	0.686605	FALSE	0	DCTN3	0	0.761905
13707	3.9816	1.262e-05	0.251156	0.666667	3	8	FALSE	DYNC1LI2	12.6667	3	0	0	0.751534	FALSE	0	DYNC1LI2	2	0.469136
13711	3.7362	0.00180374	0.267652	0	3	8	FALSE	KIF22	16.6667	3	0	0	0.771984	FALSE	0	KIF22	530	0.505376
13829	4.60736	2.525e-05	0.217044	0.666667	3	9	FALSE	KLC3	7.33333	3	0	0	0.699387	FALSE	0	KLC3	4	0.564103
13888	5.44785	0.0156827	0.183559	0	3	10	FALSE	SPTAN1	1.66667	3	0	0	0.629346	FALSE	0	SPTAN1	4636	0.333333
13903	6.17178	0	0.162028	1	3	11	FALSE	TMED9	5.66667	3	0	0	0.569018	FALSE	0	TMED9	0	0.566667
13905	6.17178	0	0.162028	1	3	11	FALSE	TMED7	5.66667	3	0	0	0.569018	FALSE	0	TMED7	0	0.566667
13918	5.52381	0.0013024	0.181034	0.333333	3	10	FALSE	ADRA1B	9.66667	3	0	0	0.623016	FALSE	0	ADRA1B	2436	0.444444
13931	4.84524	0.00783617	0.206388	0	3	9	FALSE	OXTR	8	3	0	0	0.679563	FALSE	0	OXTR	12610	0.4375
13996	5.36111	0	0.186529	1	3	9	FALSE	CCKBR	12.6667	3	0	0	0.636574	FALSE	0	CCKBR	0	0.666667
14059	5.51984	0.00310471	0.181165	0	3	10	FALSE	PLCB1	10.3333	3	0	0	0.623347	FALSE	0	PLCB1	5860	0.466667
14061	5.51984	0.00310471	0.181165	0	3	10	FALSE	PLCB2	10.3333	3	0	0	0.623347	FALSE	0	PLCB2	5860	0.466667
14063	5.51984	0.00310471	0.181165	0	3	10	FALSE	PLCB3	10.3333	3	0	0	0.623347	FALSE	0	PLCB3	5860	0.466667
14065	5.51984	0.00310471	0.181165	0	3	10	FALSE	PLCB4	10.3333	3	0	0	0.623347	FALSE	0	PLCB4	5860	0.466667
14160	5.25794	0	0.190189	1	3	9	FALSE	TACR2	15.6667	3	0	0	0.645172	FALSE	0	TACR2	0	0.602564
14211	4.78431	0.00972597	0.209016	0.333333	3	7	FALSE	HLA-A	5.66667	3	0	0	0.526961	FALSE	0	HLA-A	404	0.761905
14266	5.5098	0.00104575	0.181495	0.333333	3	8	FALSE	NCAM1	4.66667	3	0	0	0.436275	FALSE	0	NCAM1	8	0.619048
14284	3.52941	0.00686275	0.283333	0.666667	3	5	FALSE	HLA-DRB5	4.33333	3	0	0	0.683824	FALSE	0	HLA-DRB5	40	0.541667
14634	3.42169	0.00253674	0.292254	0.333333	3	5	FALSE	IGF2R	6	3	0	0	0.596386	FALSE	0	IGF2R	90	0.472222
14655	2.6506	0	0.377273	1	3	5	FALSE	REPS2	21	3	0	0	0.7249	FALSE	0	REPS2	0	0.6
14662	2.6747	0.00319514	0.373874	0.333333	3	4	FALSE	OCRL	18	3	0	0	0.720884	FALSE	0	OCRL	172	0.477477
14744	3.45783	0.00196255	0.289199	0	3	5	FALSE	AVPR2	4.33333	3	0	0	0.590361	FALSE	0	AVPR2	26	0.47619
14758	2.66265	0.00041585	0.375566	0.666667	3	5	FALSE	CBL	17	3	0	0	0.722892	FALSE	0	CBL	12	0.5
14763	2.92771	0.00271374	0.341564	0.333333	3	5	FALSE	CFTR	7.66667	3	0	0	0.678715	FALSE	0	CFTR	94	0.431373
14856	2.68675	0.0110338	0.372197	0	3	5	FALSE	FCHO1	11.3333	3	0	0	0.718876	FALSE	0	FCHO1	442	0.356322
14904	2.81928	0.00546239	0.354701	0	3	5	FALSE	VAMP2	11	3	0	0	0.696787	FALSE	0	VAMP2	240	0.384615
16122	4.85276	0.0243884	0.206068	0.333333	3	10	FALSE	RAB8A	10.3333	3	0	0	0.678937	FALSE	0	RAB8A	2444	0.4
16128	4.93252	0.00114115	0.202736	0.333333	3	10	FALSE	KIF24	8	3	0	0	0.67229	FALSE	0	KIF24	136	0.479167
16170	4.90798	0.00057093	0.20375	0	3	10	FALSE	CEP192	9.66667	3	0	0	0.674335	FALSE	0	CEP192	64	0.376812
16220	4.41718	0	0.226389	1	3	9	FALSE	CLASP1	13.3333	3	0	0	0.715235	FALSE	0	CLASP1	0	0.784314
16260	4.96933	0	0.201235	1	3	10	FALSE	HMMR	7.66667	3	0	0	0.669223	FALSE	0	HMMR	0	0.45098
16388	1	0.666667	1	0.333333	3	1	FALSE	ACTN4	1.66667	3	0	0	1	FALSE	0	ACTN4	4	0.666667
16419	5.66667	0	0.176471	1	3	10	FALSE	CLU	17	3	0	0	0.611111	FALSE	0	CLU	0	0.566667
16475	6.61508	1.581e-05	0.15117	0.666667	3	11	FALSE	THBD	5.33333	3	0	0	0.532077	FALSE	0	THBD	4	0.592593
16552	5.74206	0	0.174153	1	3	10	FALSE	PDGFB	14.6667	3	0	0	0.604828	FALSE	0	PDGFB	0	0.698413
16629	5.26374	0.0649573	0.189979	0	3	7	FALSE	ALDH1A2	1.66667	3	0	0	0.526252	FALSE	0	ALDH1A2	2104	0.333333
16637	5.65934	0.00022385	0.176699	0	3	8	FALSE	HSD11B2	3.66667	3	0	0	0.482295	FALSE	0	HSD11B2	6	0.888889
16673	4.08791	0.00294309	0.244624	0.333333	3	6	FALSE	UGT1A9	10.3333	3	0	0	0.656899	FALSE	0	UGT1A9	336	0.625
16681	4.08791	0.00294309	0.244624	0.333333	3	6	FALSE	UGT1A3	10.3333	3	0	0	0.656899	FALSE	0	UGT1A3	336	0.625
16686	5.54945	0.00089988	0.180198	0	3	8	FALSE	CYP21A2	6.66667	3	0	0	0.494505	FALSE	0	CYP21A2	64	0.708333
16709	3.87912	0.00119809	0.25779	0	3	6	FALSE	CYP2C8	9.33333	3	0	0	0.680098	FALSE	0	CYP2C8	350	0.925926
16719	3.87912	0.00119809	0.25779	0	3	6	FALSE	CYP2D6	9.33333	3	0	0	0.680098	FALSE	0	CYP2D6	350	0.925926
16739	3.87912	0.00119809	0.25779	0	3	6	FALSE	CYP3A5	9.33333	3	0	0	0.680098	FALSE	0	CYP3A5	350	0.925926
16780	3.28417	0	0.304491	1	3	6	FALSE	RIOK3	43.3333	3	0	0	0.619305	FALSE	0	RIOK3	0	0.787879
17536	3.70863	0	0.269641	1	3	6	FALSE	SENP3	11.6667	3	0	0	0.548561	FALSE	0	SENP3	0	0.466667
17791	5.53846	0.0001221	0.180556	0	3	9	FALSE	ADH5	6	3	0	0	0.495727	FALSE	0	ADH5	6	1
17795	5.53846	0.0001221	0.180556	0	3	9	FALSE	ADH6	6	3	0	0	0.495727	FALSE	0	ADH6	6	1
17799	5.53846	0.0001221	0.180556	0	3	9	FALSE	ADH7	6	3	0	0	0.495727	FALSE	0	ADH7	6	1
17825	4.85714	0.00448418	0.205882	0.333333	3	9	FALSE	GSTA3	4.33333	3	0	0	0.571429	FALSE	0	GSTA3	120	0.5
17879	4.0989	0.00166883	0.243968	0	3	8	FALSE	GSTO2	9.33333	3	0	0	0.655678	FALSE	0	GSTO2	108	0.462963
17929	4.23077	0.0001221	0.236364	0.666667	3	8	FALSE	MGST1	5.66667	3	0	0	0.641026	FALSE	0	MGST1	2	0.435897
17937	6.54762	1.335e-05	0.152727	0.666667	3	11	FALSE	RHO	12	3	0	0	0.537698	FALSE	0	RHO	10	0.571429
18000	5.62147	0	0.177889	1	3	11	FALSE	NFRKB	11	3	0	0	0.614878	FALSE	0	NFRKB	0	0.611111
18157	4.82486	0.0225193	0.20726	0	3	10	FALSE	WDR5	11.3333	3	0	0	0.681262	FALSE	0	WDR5	29662	0.356322
18381	4.17514	0.0121339	0.239513	0	3	9	FALSE	RNF2	15.6667	3	0	0	0.735405	FALSE	0	RNF2	21836	0.637681
610	2.73636	0.0001123	0.365449	0	2	4	FALSE	CPSF7	41.5	2	0	0	0.652727	FALSE	0	CPSF7	86	0.512658
1677	3.18182	0	0.314286	1	2	5	FALSE	HSPA1A	18.5	2	0	0	0.563636	FALSE	0	HSPA1A	0	0.544118
1685	3.17727	0	0.314735	1	2	5	FALSE	HSPA9	7.5	2	0	0	0.564545	FALSE	0	HSPA9	0	0.625
2122	3.66364	0	0.272953	1	2	5	FALSE	NUPL2	23.5	2	0	0	0.467273	FALSE	0	NUPL2	0	0.87037
4524	3.21942	0	0.310615	1	2	6	FALSE	PARN	29.5	2	0	0	0.630096	FALSE	0	PARN	0	0.641304
11389	4.08633	0	0.244718	1	2	6	FALSE	TRAM1	9	2	0	0	0.485612	FALSE	0	TRAM1	0	0.818182
11417	7.57937	1.686e-05	0.131937	0	2	12	FALSE	ADCY2	4	2	0	0	0.45172	FALSE	0	ADCY2	8	0.75
11435	5.6627	0	0.176594	1	2	10	FALSE	ANXA1	3	2	0	0	0.611442	FALSE	0	ANXA1	0	0.75
11438	5.6627	0	0.176594	1	2	10	FALSE	FPR2	3	2	0	0	0.611442	FALSE	0	FPR2	0	0.75
11449	4.17857	0.0696846	0.239316	0	2	8	FALSE	BDKRB1	18	2	0	0	0.735119	FALSE	0	BDKRB1	80726	0.515152
11460	6.05159	0	0.165246	1	2	11	FALSE	C5	4.5	2	0	0	0.579034	FALSE	0	C5	0	0.642857
11526	5.01984	0	0.199209	1	2	9	FALSE	CCR9	18.5	2	0	0	0.665013	FALSE	0	CCR9	0	0.74
11536	4.54365	0	0.220087	1	2	8	FALSE	CCR4	25	2	0	0	0.704696	FALSE	0	CCR4	0	0.892857
11593	6.28175	0.00793651	0.159191	0	2	10	FALSE	DRD2	4.5	2	0	0	0.559855	FALSE	0	DRD2	3498	0.5
11596	6.28175	0.00793651	0.159191	0	2	10	FALSE	OPRM1	4.5	2	0	0	0.559855	FALSE	0	OPRM1	3498	0.5
11599	5.47619	0	0.182609	1	2	9	FALSE	SSTR1	7.5	2	0	0	0.626984	FALSE	0	SSTR1	0	0.625
11851	7.1627	1.581e-05	0.139612	0	2	11	FALSE	NMS	2	2	0	0	0.486442	FALSE	0	NMS	2	1
11852	6.1746	0.00395244	0.161954	0	2	10	FALSE	NMUR1	3.5	2	0	0	0.568783	FALSE	0	NMUR1	1884	0.625
11854	6.1746	0.00395244	0.161954	0	2	10	FALSE	NMUR2	3.5	2	0	0	0.568783	FALSE	0	NMUR2	1884	0.625
11860	6.46032	1.581e-05	0.154791	0	2	10	FALSE	NPB	2	2	0	0	0.544974	FALSE	0	NPB	2	1
11861	5.47222	0.00395244	0.182741	0	2	9	FALSE	NPBWR2	7	2	0	0	0.627315	FALSE	0	NPBWR2	1782	0.545455
11863	5.47222	0.00395244	0.182741	0	2	9	FALSE	NPBWR1	7	2	0	0	0.627315	FALSE	0	NPBWR1	1782	0.545455
11867	5.47619	2.811e-05	0.182609	0	2	9	FALSE	NPY4R	7.5	2	0	0	0.626984	FALSE	0	NPY4R	12	0.8125
11869	5.47619	2.811e-05	0.182609	0	2	9	FALSE	NPY2R	7.5	2	0	0	0.626984	FALSE	0	NPY2R	12	0.8125
11872	5.47619	2.811e-05	0.182609	0	2	9	FALSE	NPY1R	7.5	2	0	0	0.626984	FALSE	0	NPY1R	12	0.8125
11875	5.47619	2.811e-05	0.182609	0	2	9	FALSE	NPY5R	7.5	2	0	0	0.626984	FALSE	0	NPY5R	12	0.8125
12178	6.72316	0	0.148739	1	2	12	FALSE	RNF146	4.5	2	0	0	0.52307	FALSE	0	RNF146	0	0.642857
12182	6.72316	0	0.148739	1	2	12	FALSE	TNKS	4.5	2	0	0	0.52307	FALSE	0	TNKS	0	0.642857
12189	4.27119	0	0.234127	1	2	8	FALSE	TRAF3	3.5	2	0	0	0.727401	FALSE	0	TRAF3	0	0.7
12313	4.79661	0	0.208481	1	2	9	FALSE	GMNN	6	2	0	0	0.683616	FALSE	0	GMNN	0	0.857143
12362	4.16384	0.0160622	0.240163	0	2	9	FALSE	KLHL12	7	2	0	0	0.736347	FALSE	0	KLHL12	32766	0.5
12411	5.31638	0	0.188098	1	2	10	FALSE	PPP2R5B	3.5	2	0	0	0.640301	FALSE	0	PPP2R5B	0	0.875
13373	3.68362	0.00265319	0.271472	0	2	8	FALSE	SMURF2	26.5	2	0	0	0.776365	FALSE	0	SMURF2	31798	0.5
13402	4.4908	0.0273089	0.222678	0	2	9	FALSE	SPTBN2	10	2	0	0	0.7091	FALSE	0	SPTBN2	6990	0.5
13419	5.3681	0.00881929	0.186286	0	2	10	FALSE	ANK2	5	2	0	0	0.635992	FALSE	0	ANK2	8334	0.5
13420	6.32515	0.00026509	0.158099	0	2	11	FALSE	SPTBN1	2.5	2	0	0	0.556237	FALSE	0	SPTBN1	10	0.5
13556	6.33129	0.0122699	0.157946	0	2	11	FALSE	CD59	4	2	0	0	0.555726	FALSE	0	CD59	1184	0.5
13647	5.3865	0.00024193	0.185649	0	2	10	FALSE	KDELR2	14	2	0	0	0.634458	FALSE	0	KDELR2	62	0.541667
13842	1.33333	0.666667	0.75	0	2	2	FALSE	MAN1A1	1.5	2	0	0	0.888889	FALSE	0	MAN1A1	4	0.5
13843	1.33333	0.666667	0.75	0	2	2	FALSE	MAN2A1	1.5	2	0	0	0.888889	FALSE	0	MAN2A1	4	0.5
13913	5.52778	0.0011443	0.180905	0	2	10	FALSE	ADRA1A	13.5	2	0	0	0.622685	FALSE	0	ADRA1A	2422	0.625
13920	5.54365	0	0.180387	1	2	10	FALSE	TBXA2R	11	2	0	0	0.621362	FALSE	0	TBXA2R	0	0.55
13960	5.34127	1.054e-05	0.187221	0	2	9	FALSE	AVPR1A	9.5	2	0	0	0.638228	FALSE	0	AVPR1A	4	0.708333
13970	5.38889	0	0.185567	1	2	9	FALSE	BRS3	9.5	2	0	0	0.634259	FALSE	0	BRS3	0	0.633333
13974	5.18651	0.00793651	0.192808	0	2	9	FALSE	CASR	5.5	2	0	0	0.651124	FALSE	0	CASR	1800	0.5
14019	5.71825	7.9e-06	0.174879	0	2	9	FALSE	EDN2	4.5	2	0	0	0.606812	FALSE	0	EDN2	2	0.875
14022	5.71825	7.9e-06	0.174879	0	2	9	FALSE	EDN3	4.5	2	0	0	0.606812	FALSE	0	EDN3	2	0.875
14119	5.38889	0	0.185567	1	2	9	FALSE	NMBR	9.5	2	0	0	0.634259	FALSE	0	NMBR	0	0.633333
14121	5.38889	0	0.185567	1	2	9	FALSE	GRPR	9.5	2	0	0	0.634259	FALSE	0	GRPR	0	0.633333
14127	5.31349	0	0.1882	1	2	9	FALSE	HCRTR2	15.5	2	0	0	0.640542	FALSE	0	HCRTR2	0	0.673913
14129	5.31349	0	0.1882	1	2	9	FALSE	HCRTR1	15.5	2	0	0	0.640542	FALSE	0	HCRTR1	0	0.673913
14144	7.09127	0.00793651	0.141018	0	2	11	FALSE	UTS2R	4	2	0	0	0.492394	FALSE	0	UTS2R	14838	0.5
14178	7.11508	2.916e-05	0.140547	0	2	11	FALSE	PROK1	3	2	0	0	0.49041	FALSE	0	PROK1	8	0.666667
14179	7.11111	5.006e-05	0.140625	0	2	11	FALSE	PROKR1	3.5	2	0	0	0.490741	FALSE	0	PROKR1	10	0.625
14205	4.82353	0	0.207317	1	2	7	FALSE	HLA-F	7	2	0	0	0.522059	FALSE	0	HLA-F	0	1
14242	2.90196	0.103274	0.344595	0	2	5	FALSE	CIITA	9	2	0	0	0.762255	FALSE	0	CIITA	1286	0.5
14279	4.33333	0.0392157	0.230769	0	2	6	FALSE	HLA-DPB1	2.5	2	0	0	0.583333	FALSE	0	HLA-DPB1	202	0.5
14299	3.60784	0	0.277174	1	2	7	FALSE	ICAM1	8	2	0	0	0.67402	FALSE	0	ICAM1	0	0.571429
14301	3.60784	0	0.277174	1	2	7	FALSE	VCAM1	8	2	0	0	0.67402	FALSE	0	VCAM1	0	0.571429
14560	3.31325	0	0.301818	1	2	6	FALSE	ACTR3C	13.5	2	0	0	0.614458	FALSE	0	ACTR3C	0	0.9
14584	3.22892	0.00156216	0.309701	0	2	6	FALSE	RAB5C	5	2	0	0	0.628514	FALSE	0	RAB5C	32	0.5
14742	3.71084	7.346e-05	0.269481	0	2	5	FALSE	DVL2	4	2	0	0	0.548193	FALSE	0	DVL2	2	1
14814	3.13253	0.00200243	0.319231	0	2	5	FALSE	LRP2	5.5	2	0	0	0.644578	FALSE	0	LRP2	72	0.5625
14868	3.24096	0.00075704	0.30855	0	2	6	FALSE	TRIP10	10	2	0	0	0.626506	FALSE	0	TRIP10	22	0.5625
14870	3.24096	0.00075704	0.30855	0	2	6	FALSE	FNBP1	10	2	0	0	0.626506	FALSE	0	FNBP1	22	0.5625
14881	3.12048	0.0008326	0.320463	0	2	5	FALSE	GAPVD1	7.5	2	0	0	0.646586	FALSE	0	GAPVD1	14	0.541667
14893	3.71084	0.0240964	0.269481	0	2	5	FALSE	LDLR	2.5	2	0	0	0.548193	FALSE	0	LDLR	608	0.5
14922	2.77108	0.00066066	0.36087	0	2	5	FALSE	SNX18	18	2	0	0	0.704819	FALSE	0	SNX18	52	0.548387
14927	3.51807	0.00043359	0.284247	0	2	6	FALSE	VAMP3	6.5	2	0	0	0.580321	FALSE	0	VAMP3	24	0.6875
14929	3.51807	0.00043359	0.284247	0	2	6	FALSE	VAMP4	6.5	2	0	0	0.580321	FALSE	0	VAMP4	24	0.6875
14931	3.51807	0.00043359	0.284247	0	2	6	FALSE	VAMP8	6.5	2	0	0	0.580321	FALSE	0	VAMP8	24	0.6875
15771	2	4.995e-05	0.5	0	2	3	FALSE	NDUFAF7	33	2	0	0	0.666667	FALSE	0	NDUFAF7	2	0.615385
16093	5.03067	0	0.19878	1	2	10	FALSE	AZI1	12	2	0	0	0.66411	FALSE	0	AZI1	0	0.666667
16130	4.96933	0	0.201235	1	2	10	FALSE	TTBK2	9.5	2	0	0	0.669223	FALSE	0	TTBK2	0	0.730769
16281	4.35583	0.00036555	0.229577	0	2	9	FALSE	NDE1	10	2	0	0	0.720348	FALSE	0	NDE1	54	0.529412
16308	4.69325	0.0122699	0.213072	0	2	9	FALSE	YWHAE	3.5	2	0	0	0.692229	FALSE	0	YWHAE	1404	0.5
16321	5.83436	0.0122699	0.171399	0	2	11	FALSE	RAB3IP	2	2	0	0	0.597137	FALSE	0	RAB3IP	1224	0.5
16387	1.33333	0	0.75	1	2	2	FALSE	ACTN1	2.5	2	0	0	0.833333	FALSE	0	ACTN1	0	0.833333
16390	1.33333	0	0.75	1	2	2	FALSE	ACTN2	2.5	2	0	0	0.833333	FALSE	0	ACTN2	0	0.833333
16442	5.65476	0	0.176842	1	2	10	FALSE	ITIH4	26.5	2	0	0	0.612103	FALSE	0	ITIH4	0	0.828125
16448	5.65476	0	0.176842	1	2	10	FALSE	SRGN	26.5	2	0	0	0.612103	FALSE	0	SRGN	0	0.828125
16468	7.5119	1.581e-05	0.133122	0	2	12	FALSE	SERPINA5	5	2	0	0	0.457341	FALSE	0	SERPINA5	4	0.8
16479	6.59524	2.371e-05	0.151625	0	2	11	FALSE	F13A1	6	2	0	0	0.53373	FALSE	0	F13A1	4	0.555556
16480	6.56746	5.692e-05	0.152266	0	2	11	FALSE	F13B	7.5	2	0	0	0.536045	FALSE	0	F13B	22	0.541667
16525	6.56349	0.00793651	0.152358	0	2	11	FALSE	MERTK	5	2	0	0	0.536376	FALSE	0	MERTK	9314	0.5
16590	5.75397	0	0.173793	1	2	10	FALSE	TIMP3	16	2	0	0	0.603836	FALSE	0	TIMP3	0	0.842105
16627	6.23077	0.021978	0.160494	0	2	8	FALSE	CYP26A1	2	2	0	0	0.418803	FALSE	0	CYP26A1	704	0.5
16633	4.34066	0.0849817	0.23038	0	2	6	FALSE	CYP26B1	6	2	0	0	0.628816	FALSE	0	CYP26B1	2792	0.5
16654	5.61538	0.00385836	0.178082	0	2	8	FALSE	HSD17B1	4	2	0	0	0.487179	FALSE	0	HSD17B1	1202	0.6
16743	6.40659	0.00041514	0.156089	0	2	9	FALSE	HSD17B2	4	2	0	0	0.399267	FALSE	0	HSD17B2	8	0.6
17172	3.97482	0	0.251584	1	2	6	FALSE	ZFP36	13	2	0	0	0.504197	FALSE	0	ZFP36	0	0.928571
17620	3.48561	0	0.286894	1	2	6	FALSE	RPP25	9	2	0	0	0.585731	FALSE	0	RPP25	0	0.5625
17622	3.48561	0	0.286894	1	2	6	FALSE	RPP30	9	2	0	0	0.585731	FALSE	0	RPP30	0	0.5625
17854	4.91209	0	0.203579	1	2	9	FALSE	GPX4	10	2	0	0	0.565324	FALSE	0	GPX4	0	0.769231
17886	5.14286	0	0.194444	1	2	9	FALSE	GSTA5	4.5	2	0	0	0.539683	FALSE	0	GSTA5	0	0.9
17927	4.24176	0	0.235751	1	2	8	FALSE	MGST3	8	2	0	0	0.639805	FALSE	0	MGST3	0	0.615385
17931	4.24176	0	0.235751	1	2	8	FALSE	MGST2	8	2	0	0	0.639805	FALSE	0	MGST2	0	0.615385
18437	5.80791	0.0112994	0.172179	0	2	11	FALSE	RBBP5	2	2	0	0	0.599341	FALSE	0	RBBP5	14822	0.5
1099	2.75455	0	0.363036	0	1	5	FALSE	DNAJC8	95	1	0	0	0.649091	FALSE	0	DNAJC8	0	0
1741	3.41818	0	0.292553	0	1	5	FALSE	SLBP	12	1	0	0	0.516364	FALSE	0	SLBP	0	0
1920	2.95	0	0.338983	0	1	4	FALSE	LUZP4	38	1	0	0	0.61	FALSE	0	LUZP4	0	0
3509	2.80455	0	0.356564	0	1	4	FALSE	U2AF1L4	74	1	0	0	0.639091	FALSE	0	U2AF1L4	0	0
3891	1	0	1	0	1	1	FALSE	EEFSEC	1	1	0	0	1	FALSE	0	EEFSEC	0	0
3892	1	0	1	0	1	1	FALSE	SECISBP2	1	1	0	0	1	FALSE	0	SECISBP2	0	0
5162	3.71942	0	0.268859	0	1	6	FALSE	ISG20L2	24	1	0	0	0.546763	FALSE	0	ISG20L2	0	0
11387	3.39209	0	0.294804	0	1	6	FALSE	SRPRB	15	1	0	0	0.601319	FALSE	0	SRPRB	0	0
11445	6.04762	0	0.165354	0	1	10	FALSE	APLNR	3	1	0	0	0.579365	FALSE	0	APLNR	0	0
11447	4.65873	0	0.214651	0	1	8	FALSE	APP	17	1	0	0	0.695106	FALSE	0	APP	0	0
11451	4.65873	0	0.214651	0	1	8	FALSE	BDKRB2	17	1	0	0	0.695106	FALSE	0	BDKRB2	0	0
11454	7.03968	0	0.142052	0	1	12	FALSE	C5AR2	4	1	0	0	0.496693	FALSE	0	C5AR2	0	0
11458	7.03968	0	0.142052	0	1	12	FALSE	C3AR1	4	1	0	0	0.496693	FALSE	0	C3AR1	0	0
11588	5.49206	0	0.182081	0	1	9	FALSE	S1PR4	11	1	0	0	0.625661	FALSE	0	S1PR4	0	0
11592	7.27778	0	0.137405	0	1	11	FALSE	CNR1	2	1	0	0	0.476852	FALSE	0	CNR1	0	0
11595	7.27778	0	0.137405	0	1	11	FALSE	CNR2	2	1	0	0	0.476852	FALSE	0	CNR2	0	0
11607	5.28175	0	0.189331	0	1	9	FALSE	SAA1	16	1	0	0	0.643188	FALSE	0	SAA1	0	0
11658	5.52381	0	0.181034	0	1	9	FALSE	CXCL16	4	1	0	0	0.623016	FALSE	0	CXCL16	0	0
11689	1	0	1	0	1	1	FALSE	FPR3	1	1	0	0	1	FALSE	0	FPR3	0	0
11690	1	0	1	0	1	1	FALSE	HEBP1	1	1	0	0	1	FALSE	0	HEBP1	0	0
11692	5.48413	0	0.182344	0	1	9	FALSE	GALR2	9	1	0	0	0.626323	FALSE	0	GALR2	0	0
11732	5.73413	0	0.174394	0	1	10	FALSE	LPAR1	18	1	0	0	0.605489	FALSE	0	LPAR1	0	0
11844	6.28968	0	0.158991	0	1	10	FALSE	HTR1A	8	1	0	0	0.559193	FALSE	0	HTR1A	0	0
11848	6.1627	0	0.162267	0	1	10	FALSE	MCHR1	4	1	0	0	0.569775	FALSE	0	MCHR1	0	0
11883	1	0	1	0	1	1	FALSE	OPRL1	1	1	0	0	1	FALSE	0	OPRL1	0	0
11884	1	0	1	0	1	1	FALSE	PNOC	1	1	0	0	1	FALSE	0	PNOC	0	0
11894	5.48016	0	0.182476	0	1	9	FALSE	SSTR4	12	1	0	0	0.626653	FALSE	0	SSTR4	0	0
11896	5.48016	0	0.182476	0	1	9	FALSE	SSTR5	12	1	0	0	0.626653	FALSE	0	SSTR5	0	0
11898	5.48016	0	0.182476	0	1	9	FALSE	SSTR2	12	1	0	0	0.626653	FALSE	0	SSTR2	0	0
11900	5.48016	0	0.182476	0	1	9	FALSE	SSTR3	12	1	0	0	0.626653	FALSE	0	SSTR3	0	0
12172	6.72881	0	0.148615	0	1	12	FALSE	TNKS2	7	1	0	0	0.522599	FALSE	0	TNKS2	0	0
12217	4.83616	0	0.206776	0	1	10	FALSE	CBLB	12	1	0	0	0.68032	FALSE	0	CBLB	0	0
12366	6.76271	0	0.14787	0	1	12	FALSE	HECW1	4	1	0	0	0.519774	FALSE	0	HECW1	0	0
12374	5.80791	0	0.172179	0	1	11	FALSE	NUMB	3	1	0	0	0.599341	FALSE	0	NUMB	0	0
13371	4.83616	0	0.206776	0	1	10	FALSE	SMURF1	12	1	0	0	0.68032	FALSE	0	SMURF1	0	0
13416	1	0	1	0	1	1	FALSE	ANK1	1	1	0	0	1	FALSE	0	ANK1	0	0
13417	1	0	1	0	1	1	FALSE	SPTB	1	1	0	0	1	FALSE	0	SPTB	0	0
13423	1	0	1	0	1	1	FALSE	ANK3	1	1	0	0	1	FALSE	0	ANK3	0	0
13424	1	0	1	0	1	1	FALSE	SPTBN4	1	1	0	0	1	FALSE	0	SPTBN4	0	0
13555	7.32515	0	0.136516	0	1	12	FALSE	CD55	2	1	0	0	0.472904	FALSE	0	CD55	0	0
13748	6.30061	0	0.158715	0	1	11	FALSE	GOLGA5	15	1	0	0	0.558282	FALSE	0	GOLGA5	0	0
13801	4.61963	0	0.216467	0	1	8	FALSE	KIF4B	10	1	0	0	0.698364	FALSE	0	KIF4B	0	0
13804	5.39264	0	0.185438	0	1	10	FALSE	KIF2A	10	1	0	0	0.633947	FALSE	0	KIF2A	0	0
13833	4.88957	0	0.204517	0	1	9	FALSE	KTN1	8	1	0	0	0.675869	FALSE	0	KTN1	0	0
13845	2	0	0.5	0	1	3	FALSE	MAN2A2	2	1	0	0	0.666667	FALSE	0	MAN2A2	0	0
13847	2	0	0.5	0	1	3	FALSE	MAN1A2	2	1	0	0	0.666667	FALSE	0	MAN1A2	0	0
13874	1	0	1	0	1	1	FALSE	OSBPL1A	1	1	0	0	1	FALSE	0	OSBPL1A	0	0
13875	1	0	1	0	1	1	FALSE	RAB7A	1	1	0	0	1	FALSE	0	RAB7A	0	0
13889	6.44172	0	0.155238	0	1	11	FALSE	SPTBN5	3	1	0	0	0.546524	FALSE	0	SPTBN5	0	0
13923	5.56746	0	0.179615	0	1	10	FALSE	ADRA1D	19	1	0	0	0.619378	FALSE	0	ADRA1D	0	0
13929	5.74206	0	0.174153	0	1	10	FALSE	GRM1	5	1	0	0	0.604828	FALSE	0	GRM1	0	0
13933	5.74206	0	0.174153	0	1	10	FALSE	OPN4	5	1	0	0	0.604828	FALSE	0	OPN4	0	0
13942	5.10714	0	0.195804	0	1	9	FALSE	GRK5	6	1	0	0	0.657738	FALSE	0	GRK5	0	0
13947	5.56746	0	0.179615	0	1	10	FALSE	ARHGEF25	19	1	0	0	0.619378	FALSE	0	ARHGEF25	0	0
13954	5.36508	0	0.186391	0	1	9	FALSE	AVPR1B	10	1	0	0	0.636243	FALSE	0	AVPR1B	0	0
13975	6.18254	0	0.161746	0	1	10	FALSE	NPSR1	2	1	0	0	0.568122	FALSE	0	NPSR1	0	0
14005	5.56746	0	0.179615	0	1	10	FALSE	CHRM3	19	1	0	0	0.619378	FALSE	0	CHRM3	0	0
14007	5.5119	0	0.181425	0	1	9	FALSE	CPB2	9	1	0	0	0.624008	FALSE	0	CPB2	0	0
14009	1	0	1	0	1	1	FALSE	CYSLTR2	1	1	0	0	1	FALSE	0	CYSLTR2	0	0
14010	1	0	1	0	1	1	FALSE	LTB4R2	1	1	0	0	1	FALSE	0	LTB4R2	0	0
14027	5.5119	0	0.181425	0	1	9	FALSE	F2RL1	9	1	0	0	0.624008	FALSE	0	F2RL1	0	0
14029	5.5119	0	0.181425	0	1	9	FALSE	F2R	9	1	0	0	0.624008	FALSE	0	F2R	0	0
14031	5.5119	0	0.181425	0	1	9	FALSE	F2RL3	9	1	0	0	0.624008	FALSE	0	F2RL3	0	0
14035	5.5119	0	0.181425	0	1	9	FALSE	F2RL2	9	1	0	0	0.624008	FALSE	0	F2RL2	0	0
14037	6.09921	0	0.163956	0	1	10	FALSE	FFAR1	12	1	0	0	0.575066	FALSE	0	FFAR1	0	0
14047	6.09921	0	0.163956	0	1	10	FALSE	GCGR	12	1	0	0	0.575066	FALSE	0	GCGR	0	0
14072	5.56746	0	0.179615	0	1	10	FALSE	HTR2A	19	1	0	0	0.619378	FALSE	0	HTR2A	0	0
14074	5.56746	0	0.179615	0	1	10	FALSE	HTR2B	19	1	0	0	0.619378	FALSE	0	HTR2B	0	0
14079	5.56746	0	0.179615	0	1	10	FALSE	MCHR2	19	1	0	0	0.619378	FALSE	0	MCHR2	0	0
14081	5.56746	0	0.179615	0	1	10	FALSE	TUB	19	1	0	0	0.619378	FALSE	0	TUB	0	0
14083	5.56746	0	0.179615	0	1	10	FALSE	QRFPR	19	1	0	0	0.619378	FALSE	0	QRFPR	0	0
14132	6.14286	0	0.162791	0	1	10	FALSE	NPFFR2	9	1	0	0	0.571429	FALSE	0	NPFFR2	0	0
14140	6.24206	0	0.160203	0	1	10	FALSE	NPFFR1	8	1	0	0	0.563161	FALSE	0	NPFFR1	0	0
14154	7.00794	0	0.142695	0	1	11	FALSE	MLNR	5	1	0	0	0.499339	FALSE	0	MLNR	0	0
14169	5.35714	0	0.186667	0	1	9	FALSE	NTSR1	13	1	0	0	0.636905	FALSE	0	NTSR1	0	0
14171	5.35714	0	0.186667	0	1	9	FALSE	NTSR2	13	1	0	0	0.636905	FALSE	0	NTSR2	0	0
14194	5.78968	0	0.172721	0	1	10	FALSE	TRHR	14	1	0	0	0.60086	FALSE	0	TRHR	0	0
14196	8.0873	0	0.123651	0	1	12	FALSE	UTS2	2	1	0	0	0.409392	FALSE	0	UTS2	0	0
14240	5.56863	0	0.179577	0	1	8	FALSE	CD160	7	1	0	0	0.428922	FALSE	0	CD160	0	0
14264	3.35294	0	0.298246	0	1	7	FALSE	GBP4	25	1	0	0	0.705882	FALSE	0	GBP4	0	0
14276	5.56863	0	0.179577	0	1	8	FALSE	TRIM45	7	1	0	0	0.428922	FALSE	0	TRIM45	0	0
14278	5.31373	0	0.188192	0	1	7	FALSE	HLA-DPA1	2	1	0	0	0.460784	FALSE	0	HLA-DPA1	0	0
14297	4.2549	0	0.235023	0	1	6	FALSE	LILRA6	5	1	0	0	0.593137	FALSE	0	LILRA6	0	0
14429	3.76471	0	0.265625	0	1	8	FALSE	IRF2	18	1	0	0	0.654412	FALSE	0	IRF2	0	0
14467	3.64706	0	0.274194	0	1	8	FALSE	TRIM25	24	1	0	0	0.669118	FALSE	0	TRIM25	0	0
14510	1	0	1	0	1	1	FALSE	PML	1	1	0	0	1	FALSE	0	PML	0	0
14511	1	0	1	0	1	1	FALSE	SP100	1	1	0	0	1	FALSE	0	SP100	0	0
14840	3.54217	0	0.282313	0	1	6	FALSE	L1CAM	6	1	0	0	0.576305	FALSE	0	L1CAM	0	0
14873	3.26506	0	0.306273	0	1	6	FALSE	FNBP1L	17	1	0	0	0.62249	FALSE	0	FNBP1L	0	0
14894	4.6988	0	0.212821	0	1	6	FALSE	SCARB2	2	1	0	0	0.383534	FALSE	0	SCARB2	0	0
16176	5.95092	0	0.168041	0	1	11	FALSE	CEP250	5	1	0	0	0.587423	FALSE	0	CEP250	0	0
16193	1	0	1	0	1	1	FALSE	CEP89	1	1	0	0	1	FALSE	0	CEP89	0	0
16194	1	0	1	0	1	1	FALSE	FBF1	1	1	0	0	1	FALSE	0	FBF1	0	0
16200	4.93252	0	0.202736	0	1	10	FALSE	SFI1	9	1	0	0	0.67229	FALSE	0	SFI1	0	0
16302	4.41104	0	0.226704	0	1	9	FALSE	NUMA1	24	1	0	0	0.715746	FALSE	0	NUMA1	0	0
16320	6.82822	0	0.146451	0	1	12	FALSE	RAB11A	2	1	0	0	0.514315	FALSE	0	RAB11A	0	0
16324	4.41104	0	0.226704	0	1	9	FALSE	SSNA1	24	1	0	0	0.715746	FALSE	0	SSNA1	0	0
16372	5.68712	0	0.175836	0	1	10	FALSE	YWHAG	2	1	0	0	0.609407	FALSE	0	YWHAG	0	0
16375	6.62698	0	0.150898	0	1	11	FALSE	SERPINA3	6	1	0	0	0.531085	FALSE	0	SERPINA3	0	0
16393	1.66667	0	0.6	0	1	2	FALSE	ALDOA	3	1	0	0	0.666667	FALSE	0	ALDOA	0	0
16395	5.76587	0	0.173434	0	1	10	FALSE	ADAMTS13	13	1	0	0	0.602844	FALSE	0	ADAMTS13	0	0
16407	6.60714	0	0.151351	0	1	11	FALSE	ITIH3	11	1	0	0	0.532738	FALSE	0	ITIH3	0	0
16413	6.60714	0	0.151351	0	1	11	FALSE	SPP2	11	1	0	0	0.532738	FALSE	0	SPP2	0	0
16424	5.69444	0	0.17561	0	1	10	FALSE	SERPINA4	26	1	0	0	0.608796	FALSE	0	SERPINA4	0	0
16463	6.61905	0	0.151079	0	1	11	FALSE	CLEC3B	9	1	0	0	0.531746	FALSE	0	CLEC3B	0	0
16524	7.55952	0	0.132283	0	1	12	FALSE	GAS6	2	1	0	0	0.453373	FALSE	0	GAS6	0	0
16547	5.76587	0	0.173434	0	1	10	FALSE	MMRN1	13	1	0	0	0.602844	FALSE	0	MMRN1	0	0
16560	5.69048	0	0.175732	0	1	10	FALSE	SERPING1	27	1	0	0	0.609127	FALSE	0	SERPING1	0	0
16583	6.55952	0	0.15245	0	1	11	FALSE	TGFB3	12	1	0	0	0.536706	FALSE	0	TGFB3	0	0
16598	6.5754	0	0.152082	0	1	11	FALSE	VEGFC	12	1	0	0	0.535384	FALSE	0	VEGFC	0	0
16602	5.76984	0	0.173315	0	1	10	FALSE	TMSB4X	17	1	0	0	0.602513	FALSE	0	TMSB4X	0	0
16604	5.76984	0	0.173315	0	1	10	FALSE	VEGFB	17	1	0	0	0.602513	FALSE	0	VEGFB	0	0
16621	5.67033	0	0.176357	0	1	8	FALSE	HSD11B1	5	1	0	0	0.481074	FALSE	0	HSD11B1	0	0
16626	7.21978	0	0.138508	0	1	9	FALSE	ALDH1A1	2	1	0	0	0.308913	FALSE	0	ALDH1A1	0	0
16630	6.25275	0	0.15993	0	1	8	FALSE	CYP26C1	3	1	0	0	0.416361	FALSE	0	CYP26C1	0	0
16656	5.63736	0	0.177388	0	1	8	FALSE	HSD17B7	6	1	0	0	0.484737	FALSE	0	HSD17B7	0	0
16698	4.71429	0	0.212121	0	1	7	FALSE	UGT1A8	10	1	0	0	0.587302	FALSE	0	UGT1A8	0	0
16702	4.71429	0	0.212121	0	1	7	FALSE	UGT1A10	10	1	0	0	0.587302	FALSE	0	UGT1A10	0	0
16705	4.71429	0	0.212121	0	1	7	FALSE	UGT1A5	10	1	0	0	0.587302	FALSE	0	UGT1A5	0	0
16727	4.24176	0	0.235751	0	1	6	FALSE	CYP3A7	12	1	0	0	0.639805	FALSE	0	CYP3A7	0	0
16729	4.24176	0	0.235751	0	1	6	FALSE	UGT2B4	12	1	0	0	0.639805	FALSE	0	UGT2B4	0	0
16751	6.48352	0	0.154237	0	1	9	FALSE	SRD5A3	6	1	0	0	0.39072	FALSE	0	SRD5A3	0	0
16753	1	0	1	0	1	1	FALSE	UGDH	1	1	0	0	1	FALSE	0	UGDH	0	0
16754	1	0	1	0	1	1	FALSE	UXS1	1	1	0	0	1	FALSE	0	UXS1	0	0
17830	4.97802	0	0.200883	0	1	9	FALSE	GGT7	10	1	0	0	0.557998	FALSE	0	GGT7	0	0
17902	4.25275	0	0.235142	0	1	8	FALSE	GSTK1	13	1	0	0	0.638584	FALSE	0	GSTK1	0	0
17945	7.10714	0	0.140704	0	1	12	FALSE	OPN1SW	12	1	0	0	0.491071	FALSE	0	OPN1SW	0	0
17953	6.23413	0	0.160407	0	1	11	FALSE	KCNJ6	14	1	0	0	0.563823	FALSE	0	KCNJ6	0	0
17955	6.23413	0	0.160407	0	1	11	FALSE	KCNJ3	14	1	0	0	0.563823	FALSE	0	KCNJ3	0	0
17957	6.23413	0	0.160407	0	1	11	FALSE	KCNJ5	14	1	0	0	0.563823	FALSE	0	KCNJ5	0	0
17960	1	0	1	0	1	1	FALSE	GPR176	1	1	0	0	1	FALSE	0	GPR176	0	0
17961	1	0	1	0	1	1	FALSE	GPR27	1	1	0	0	1	FALSE	0	GPR27	0	0
18187	4.89266	0	0.204388	0	1	10	FALSE	UBE2I	25	1	0	0	0.675612	FALSE	0	UBE2I	0	0
18191	4.89266	0	0.204388	0	1	10	FALSE	TCF7L2	25	1	0	0	0.675612	FALSE	0	TCF7L2	0	0
18436	6.80226	0	0.14701	0	1	12	FALSE	MEN1	2	1	0	0	0.516478	FALSE	0	MEN1	0	0

## Sheet: Sheet2
Table S5.Endogenous Genes of Canine Hydatidosis
SUID	AverageShortestPathLength	BetweennessCentrality	ClosenessCentrality	ClusteringCoefficient	Degree	Eccentricity	IsSingleNode	name	NeighborhoodConnectivity	NumberOfDirectedEdges	NumberOfUndirectedEdges	PartnerOfMultiEdgedNodePairs	Radiality	selected	SelfLoops	shared name	Stress	TopologicalCoefficient
165	2.21455	0.173063	0.45156	0.0502283	73	6	FALSE	EHMT1	10.6986	73	0	0	0.865051	FALSE	0	EHMT1	152900	0.0596158
318	2.11636	0.16609	0.472509	0.0750583	66	5	FALSE	ACTL9	13.6515	66	0	0	0.87596	FALSE	0	ACTL9	163958	0.0692201
324	2.12727	0.144385	0.470085	0.0769231	65	5	FALSE	ACTL7B	13.7692	65	0	0	0.874747	FALSE	0	ACTL7B	142234	0.0705325
77	2.56364	0.075534	0.390071	0.0858396	57	6	FALSE	SMARCA2	9.26316	57	0	0	0.826263	FALSE	0	SMARCA2	42200	0.0711201
158	2.47273	0.0550464	0.404412	0.196809	48	6	FALSE	MAPK12	20.3958	48	0	0	0.836364	FALSE	0	MAPK12	81988	0.125
429	2.47636	0.0458267	0.403818	0.223232	45	6	FALSE	MAPK4	21.4	45	0	0	0.83596	FALSE	0	MAPK4	70806	0.129293
310	2.33091	0.184667	0.429017	0.0674764	39	5	FALSE	LRGUK	14.1026	39	0	0	0.852121	FALSE	0	LRGUK	130938	0.0925156
94	2.51273	0.0291629	0.397974	0.194296	34	6	FALSE	CALM3	18.8824	34	0	0	0.831919	FALSE	0	CALM3	31760	0.114438
508	3.09818	0.0068026	0.32277	0.329768	34	7	FALSE	GNA12	19.5	34	0	0	0.766869	FALSE	0	GNA12	7000	0.213963
212	2.55636	0.0203069	0.391181	0.206439	33	6	FALSE	RRAS	23.4848	33	0	0	0.827071	FALSE	0	RRAS	46356	0.147513
361	2.57818	0.0234295	0.38787	0.162879	33	6	FALSE	RAP2C	22.2121	33	0	0	0.824646	FALSE	0	RAP2C	43908	0.143841
133	2.52364	0.025369	0.396254	0.185484	32	6	FALSE	CALM1	19.125	32	0	0	0.830707	FALSE	0	CALM1	29010	0.116616
367	2.57455	0.0158663	0.388418	0.191532	32	6	FALSE	RERGL	23.3438	32	0	0	0.825051	FALSE	0	RERGL	40306	0.147745
422	2.57455	0.0158663	0.388418	0.191532	32	6	FALSE	RASL11B	23.3438	32	0	0	0.825051	FALSE	0	RASL11B	40306	0.147745
102	3.22182	0.00134141	0.310384	0.430108	31	7	FALSE	PRKAR1A	19.4194	31	0	0	0.753131	FALSE	0	PRKAR1A	2984	0.269713
356	2.58909	0.0153809	0.386236	0.180645	31	6	FALSE	RASD1	23.4194	31	0	0	0.823434	FALSE	0	RASD1	39922	0.151864
409	2.66182	0.049793	0.375683	0.113978	31	6	FALSE	LRRK1	22.3548	31	0	0	0.815354	FALSE	0	LRRK1	39622	0.160819
209	2.70909	0.0236801	0.369128	0.226601	29	6	FALSE	MYO5C	20.8621	29	0	0	0.810101	FALSE	0	MYO5C	26352	0.158463
210	2.38909	0.0717999	0.418569	0.12963	28	5	FALSE	RHBDL3	18.6071	28	0	0	0.845657	FALSE	0	RHBDL3	54356	0.113354
387	2.54909	0.0152332	0.392297	0.150997	27	6	FALSE	CABP4	20.1481	27	0	0	0.827879	FALSE	0	CABP4	19728	0.128908
98	3.45091	0.00096016	0.289779	0.102767	23	7	FALSE	PDE4D	15.5652	23	0	0	0.727677	FALSE	0	PDE4D	968	0.27795
104	3.45091	0.00096016	0.289779	0.102767	23	7	FALSE	PDE11A	15.5652	23	0	0	0.727677	FALSE	0	PDE11A	968	0.27795
106	3.45091	0.00096016	0.289779	0.102767	23	7	FALSE	PDE7A	15.5652	23	0	0	0.727677	FALSE	0	PDE7A	968	0.27795
108	3.45091	0.00096016	0.289779	0.102767	23	7	FALSE	PDE7B	15.5652	23	0	0	0.727677	FALSE	0	PDE7B	968	0.27795
255	3.13455	0.0970869	0.319026	0.256917	23	6	FALSE	HADHA	9.04348	23	0	0	0.762828	FALSE	0	HADHA	92484	0.176471
510	3.45091	0.00096016	0.289779	0.102767	23	7	FALSE	PDE4B	15.5652	23	0	0	0.727677	FALSE	0	PDE4B	968	0.27795
113	2.50182	0.0270499	0.399709	0.290043	22	6	FALSE	PRKCA	26.1364	22	0	0	0.833131	FALSE	0	PRKCA	29488	0.146834
196	2.50182	0.0270499	0.399709	0.290043	22	6	FALSE	PRKCB	26.1364	22	0	0	0.833131	FALSE	0	PRKCB	29488	0.146834
124	2.61818	0.022349	0.381944	0.271429	21	6	FALSE	RHOJ	27.1905	21	0	0	0.820202	FALSE	0	RHOJ	16172	0.173188
79	2.8	0.0103061	0.357143	0.384211	20	6	FALSE	ACTN2	21.85	20	0	0	0.8	FALSE	0	ACTN2	13270	0.191667
168	2.54545	0.0296936	0.392857	0.20915	18	6	FALSE	FYN	21.5	18	0	0	0.828283	FALSE	0	FYN	21700	0.128077
80	2.89455	0.00502624	0.345477	0.507353	17	6	FALSE	TPM4	21.0588	17	0	0	0.789495	FALSE	0	TPM4	6824	0.210588
119	2.81091	0.00526199	0.355757	0.404412	17	6	FALSE	SPTBN2	23.5294	17	0	0	0.798788	FALSE	0	SPTBN2	6282	0.206398
320	2.85455	0.00375029	0.350318	0.441176	17	6	FALSE	MYO18B	24	17	0	0	0.793939	FALSE	0	MYO18B	6072	0.226415
327	2.85455	0.00449657	0.350318	0.433824	17	6	FALSE	MYH7B	23.9412	17	0	0	0.793939	FALSE	0	MYH7B	7990	0.22586
187	3.31636	0.00040527	0.301535	0.458333	16	7	FALSE	KERA	29.125	16	0	0	0.742626	FALSE	0	KERA	3550	0.469758
188	3.31636	0.00040527	0.301535	0.458333	16	7	FALSE	LUM	29.125	16	0	0	0.742626	FALSE	0	LUM	3550	0.469758
262	3.72727	0.0316978	0.268293	0.166667	16	7	FALSE	CPS1	6.1875	16	0	0	0.69697	FALSE	0	CPS1	33270	0.154688
912	3.31636	0.00040527	0.301535	0.458333	16	7	FALSE	OMD	29.125	16	0	0	0.742626	FALSE	0	OMD	3550	0.469758
1423	3.21818	0.0559535	0.310734	0.241667	16	6	FALSE	THNSL1	9.1875	16	0	0	0.753535	FALSE	0	THNSL1	50850	0.1825
121	2.82182	0.00245713	0.354381	0.485714	15	6	FALSE	SPTBN4	26.0667	15	0	0	0.797576	FALSE	0	SPTBN4	3232	0.230678
259	4.01455	0.0101511	0.249094	0.295238	15	7	FALSE	ALDH5A1	8.93333	15	0	0	0.665051	FALSE	0	ALDH5A1	26994	0.291111
671	3.31636	0.00118405	0.301535	0.247619	15	7	FALSE	LRFN5	29.3333	15	0	0	0.742626	FALSE	0	LRFN5	4390	0.472043
90	3.12	0.00169009	0.320513	0.582418	14	6	FALSE	TNNI2	19.1429	14	0	0	0.764444	FALSE	0	TNNI2	3364	0.308756
271	3.22182	0.0386797	0.310384	0.197802	14	6	FALSE	ENO1	9.07143	14	0	0	0.753131	FALSE	0	ENO1	19510	0.180758
272	2.47636	0.224185	0.403818	0.230769	14	5	FALSE	GAPDH	21.7143	14	0	0	0.83596	FALSE	0	GAPDH	220542	0.146236
694	3.32364	0.00040527	0.300875	0.285714	14	7	FALSE	CHADL	31	14	0	0	0.741818	FALSE	0	CHADL	3550	0.5
848	3.32364	0.00040527	0.300875	0.285714	14	7	FALSE	EPYC	31	14	0	0	0.741818	FALSE	0	EPYC	3550	0.5
902	3.32364	0.00040527	0.300875	0.285714	14	7	FALSE	LINGO1	31	14	0	0	0.741818	FALSE	0	LINGO1	3550	0.5
904	3.32364	0.00040527	0.300875	0.285714	14	7	FALSE	LRRTM1	31	14	0	0	0.741818	FALSE	0	LRRTM1	3550	0.5
906	3.32364	0.00040527	0.300875	0.285714	14	7	FALSE	LRRN1	31	14	0	0	0.741818	FALSE	0	LRRN1	3550	0.5
909	3.32364	0.00040527	0.300875	0.285714	14	7	FALSE	LRRC8E	31	14	0	0	0.741818	FALSE	0	LRRC8E	3550	0.5
917	3.32364	0.00040527	0.300875	0.285714	14	7	FALSE	LRRN3	31	14	0	0	0.741818	FALSE	0	LRRN3	3550	0.5
919	3.32364	0.00040527	0.300875	0.285714	14	7	FALSE	LRRC4	31	14	0	0	0.741818	FALSE	0	LRRC4	3550	0.5
921	3.32364	0.00040527	0.300875	0.285714	14	7	FALSE	LRSAM1	31	14	0	0	0.741818	FALSE	0	LRSAM1	3550	0.5
925	3.32364	0.00040527	0.300875	0.285714	14	7	FALSE	LRRC4B	31	14	0	0	0.741818	FALSE	0	LRRC4B	3550	0.5
927	3.32364	0.00040527	0.300875	0.285714	14	7	FALSE	LRWD1	31	14	0	0	0.741818	FALSE	0	LRWD1	3550	0.5
929	3.32364	0.00040527	0.300875	0.285714	14	7	FALSE	LRRTM4	31	14	0	0	0.741818	FALSE	0	LRRTM4	3550	0.5
931	3.32364	0.00040527	0.300875	0.285714	14	7	FALSE	LRRC4C	31	14	0	0	0.741818	FALSE	0	LRRC4C	3550	0.5
935	3.32364	0.00040527	0.300875	0.285714	14	7	FALSE	LRRTM2	31	14	0	0	0.741818	FALSE	0	LRRTM2	3550	0.5
940	3.32364	0.00040527	0.300875	0.285714	14	7	FALSE	LRRC55	31	14	0	0	0.741818	FALSE	0	LRRC55	3550	0.5
1429	4.01818	0.0100017	0.248869	0.274725	14	7	FALSE	ALDH1A2	8.92857	14	0	0	0.664646	FALSE	0	ALDH1A2	26952	0.290476
88	3.04727	0.0107895	0.328162	0.153846	13	7	FALSE	CTNNA1	15.3846	13	0	0	0.772525	FALSE	0	CTNNA1	8036	0.162945
138	2.96727	0.00996389	0.33701	0.384615	13	6	FALSE	MYL10	15.8462	13	0	0	0.781414	FALSE	0	MYL10	5964	0.187729
1455	3.25091	0.0210807	0.307606	0.307692	13	6	FALSE	LDHC	11.5385	13	0	0	0.749899	FALSE	0	LDHC	31850	0.26049
72	2.85091	0.00605974	0.350765	0.424242	12	6	FALSE	ACTL6B	25	12	0	0	0.794343	FALSE	0	ACTL6B	6042	0.241909
75	2.90182	0.00795785	0.344612	0.333333	12	6	FALSE	SMARCC1	21.1667	12	0	0	0.788687	FALSE	0	SMARCC1	4922	0.229167
100	3.21818	0.00269911	0.310734	0.333333	12	7	FALSE	ADCY8	25.0833	12	0	0	0.753535	FALSE	0	ADCY8	4098	0.334444
167	2.72	0.0170883	0.367647	0.439394	12	6	FALSE	EPHA4	21.25	12	0	0	0.808889	FALSE	0	EPHA4	12884	0.161578
218	2.77455	0.0172002	0.360419	0.318182	12	6	FALSE	ABL2	19.75	12	0	0	0.802828	FALSE	0	ABL2	10422	0.165254
260	3.25818	0.0138079	0.30692	0.363636	12	6	FALSE	MDH1	12.4167	12	0	0	0.749091	FALSE	0	MDH1	29428	0.282197
794	2.72364	0.00904409	0.367156	0.30303	12	6	FALSE	STK32B	31.6667	12	0	0	0.808485	FALSE	0	STK32B	10282	0.235075
1450	3.25818	0.0138079	0.30692	0.363636	12	6	FALSE	MDH1B	12.4167	12	0	0	0.749091	FALSE	0	MDH1B	29428	0.282197
86	3.05818	0.0033611	0.326992	0.618182	11	6	FALSE	MYL1	17.1818	11	0	0	0.771313	FALSE	0	MYL1	2874	0.235367
96	3.22545	0.00203593	0.310034	0.345455	11	7	FALSE	ADCY3	24.5455	11	0	0	0.752727	FALSE	0	ADCY3	3150	0.331695
128	2.99273	0.0130004	0.334143	0.272727	11	7	FALSE	ATR	17.1818	11	0	0	0.778586	FALSE	0	ATR	17668	0.170117
154	3.34909	0.0319473	0.298588	0.4	11	7	FALSE	WNT5A	9.63636	11	0	0	0.73899	FALSE	0	WNT5A	33090	0.251196
170	2.75636	0.00584376	0.362797	0.527273	11	6	FALSE	EPHA7	22.6364	11	0	0	0.804848	FALSE	0	EPHA7	6940	0.179654
555	3.09455	0.00180572	0.323149	0.327273	11	7	FALSE	BRD1	16.3636	11	0	0	0.767273	FALSE	0	BRD1	1300	0.188088
1468	3.98182	0.00205091	0.251142	0.509091	11	7	FALSE	ILVBL	13.1818	11	0	0	0.668687	FALSE	0	ILVBL	1034	0.313853
134	3.05091	0.00403155	0.327771	0.2	10	6	FALSE	PPP3CC	18.8	10	0	0	0.772121	FALSE	0	PPP3CC	4518	0.308333
144	3.09091	0.00316641	0.323529	0.333333	10	7	FALSE	CREB1	19.6	10	0	0	0.767677	FALSE	0	CREB1	2724	0.216667
257	4.05091	0.00042284	0.246858	0.533333	10	7	FALSE	ECHS1	10.3	10	0	0	0.66101	FALSE	0	ECHS1	152	0.332258
753	3.21818	0.00103393	0.310734	0.4	10	7	FALSE	MAP3K6	18.6	10	0	0	0.753535	FALSE	0	MAP3K6	1056	0.273529
1437	4.03273	0.0045697	0.247971	0.466667	10	7	FALSE	AIFM3	11.6	10	0	0	0.66303	FALSE	0	AIFM3	9070	0.341176
84	3.37818	0.00027186	0.296017	0.75	9	7	FALSE	TTN	15.3333	9	0	0	0.735758	FALSE	0	TTN	568	0.319444
181	2.82545	0.0340959	0.353925	0.222222	9	6	FALSE	GLI1	32.8889	9	0	0	0.797172	FALSE	0	GLI1	32116	0.300714
233	2.86909	0.00527373	0.348542	0.416667	9	6	FALSE	TUBA8	30.3333	9	0	0	0.792323	FALSE	0	TUBA8	6442	0.29342
234	2.81455	0.00076843	0.355297	0.527778	9	6	FALSE	TUBE1	40.3333	9	0	0	0.798384	FALSE	0	TUBE1	1664	0.344729
236	2.81455	0.00076843	0.355297	0.527778	9	6	FALSE	TUBB1	40.3333	9	0	0	0.798384	FALSE	0	TUBB1	1664	0.344729
238	2.81455	0.00076843	0.355297	0.527778	9	6	FALSE	TUBB6	40.3333	9	0	0	0.798384	FALSE	0	TUBB6	1664	0.344729
254	4.05818	0.0145845	0.246416	0.388889	9	7	FALSE	ACADM	9.66667	9	0	0	0.660202	FALSE	0	ACADM	7340	0.337302
517	2.76364	0.0069343	0.361842	0.0833333	9	6	FALSE	DCLK1	26	9	0	0	0.80404	FALSE	0	DCLK1	7208	0.199653
823	2.77455	0.00764211	0.360419	0.194444	9	6	FALSE	PIM2	26.3333	9	0	0	0.802828	FALSE	0	PIM2	5904	0.213189
1481	4.04	0.00013343	0.247525	0.638889	9	7	FALSE	IDH1	12.2222	9	0	0	0.662222	FALSE	0	IDH1	92	0.394265
1493	4.09818	0.00274528	0.244011	0.388889	9	7	FALSE	TAT	10.7778	9	0	0	0.655758	FALSE	0	TAT	7912	0.313725
73	2.98182	0.0021939	0.335366	0.357143	8	6	FALSE	ARID4A	22.875	8	0	0	0.779798	FALSE	0	ARID4A	2366	0.277439
92	3.61091	4.216e-05	0.276939	0.857143	8	7	FALSE	TNNT3	13.375	8	0	0	0.709899	FALSE	0	TNNT3	38	0.445833
131	3.12	0.00030754	0.320513	0.392857	8	7	FALSE	BPTF	15.75	8	0	0	0.764444	FALSE	0	BPTF	164	0.189759
243	3.70545	0.00483332	0.269872	0.75	8	7	FALSE	WNT7A	7.75	8	0	0	0.699394	FALSE	0	WNT7A	7228	0.3875
246	3.70545	0.00483332	0.269872	0.75	8	7	FALSE	WNT3A	7.75	8	0	0	0.699394	FALSE	0	WNT3A	7228	0.3875
280	1	0.708333	1	0.214286	8	1	FALSE	ACVR2B	2.5	8	0	0	1	FALSE	0	ACVR2B	44	0.425
291	4.25455	0.0073696	0.235043	0.678571	8	8	FALSE	WNT1	6.75	8	0	0	0.638384	FALSE	0	WNT1	8094	0.509615
297	3.01818	0.00021922	0.331325	0.642857	8	6	FALSE	PPTC7	14.5	8	0	0	0.775758	FALSE	0	PPTC7	286	0.245763
312	3.01818	0.00021922	0.331325	0.642857	8	6	FALSE	PDP1	14.5	8	0	0	0.775758	FALSE	0	PDP1	286	0.245763
316	2.87636	0.00078678	0.347661	0.535714	8	6	FALSE	EP400	38	8	0	0	0.791515	FALSE	0	EP400	1008	0.368932
398	2.74182	0.00867328	0.364721	0.214286	8	6	FALSE	POGZ	41.25	8	0	0	0.806465	FALSE	0	POGZ	6512	0.294964
541	3.10545	0.00165088	0.322014	0.5	8	7	FALSE	CHD6	22.5	8	0	0	0.766061	FALSE	0	CHD6	854	0.255682
126	3.07636	0.00118279	0.325059	0.47619	7	7	FALSE	RBBP4	24.1429	7	0	0	0.769293	FALSE	0	RBBP4	984	0.265306
148	3.15636	0.00663544	0.31682	0.47619	7	7	FALSE	CCNA1	16.1429	7	0	0	0.760404	FALSE	0	CCNA1	11888	0.199295
190	3.52	0.00078923	0.284091	0.285714	7	7	FALSE	KIF3B	13.7143	7	0	0	0.72	FALSE	0	KIF3B	556	0.334495
201	3.27636	0.00296335	0.305216	0.142857	7	7	FALSE	YWHAB	12.4286	7	0	0	0.747071	FALSE	0	YWHAB	3390	0.258359
240	4.25818	9.687e-05	0.234842	0.904762	7	8	FALSE	WNT16	7.71429	7	0	0	0.63798	FALSE	0	WNT16	72	0.55102
241	3.59273	0.00584006	0.27834	0.714286	7	7	FALSE	WNT6	8.57143	7	0	0	0.711919	FALSE	0	WNT6	4046	0.36646
268	2.98182	0.0559796	0.335366	0.190476	7	6	FALSE	HSPA4L	14.5714	7	0	0	0.779798	FALSE	0	HSPA4L	49658	0.19305
274	4.06909	0.00041685	0.245755	0.571429	7	7	FALSE	SUCLG1	11.5714	7	0	0	0.65899	FALSE	0	SUCLG1	214	0.42328
275	4.06545	0.00017719	0.245975	0.619048	7	7	FALSE	SUCLG2	12.1429	7	0	0	0.659394	FALSE	0	SUCLG2	76	0.418719
299	3.25818	0.00164509	0.30692	0.190476	7	7	FALSE	LPXN	13.5714	7	0	0	0.749091	FALSE	0	LPXN	832	0.241558
307	3.04727	0.00021922	0.328162	0.52381	7	7	FALSE	PNPLA7	20.2857	7	0	0	0.772525	FALSE	0	PNPLA7	286	0.225397
314	2.99636	3.606e-05	0.333738	0.714286	7	6	FALSE	CAPZA3	32	7	0	0	0.778182	FALSE	0	CAPZA3	28	0.380952
682	2.84364	0.012026	0.351662	0.285714	7	6	FALSE	MYBL1	26.4286	7	0	0	0.795152	FALSE	0	MYBL1	7330	0.236808
785	2.84	0.002038	0.352113	0.285714	7	6	FALSE	FLT1	28.4286	7	0	0	0.795556	FALSE	0	FLT1	1954	0.252551
1486	4.13091	0.00340033	0.242077	0.380952	7	7	FALSE	CNDP2	7.85714	7	0	0	0.652121	FALSE	0	CNDP2	5042	0.27551
1491	4.00364	0.00299583	0.249773	0.380952	7	7	FALSE	SHMT1	11.2857	7	0	0	0.666263	FALSE	0	SHMT1	4060	0.282143
82	3.64727	0	0.274177	1	6	7	FALSE	TNNT1	13.1667	6	0	0	0.705859	FALSE	0	TNNT1	0	0.526667
129	3.47273	0.00240854	0.287958	0.466667	6	7	FALSE	CHEK2	15.3333	6	0	0	0.725253	FALSE	0	CHEK2	2636	0.22549
140	3.17818	0.00050873	0.314645	0.2	6	6	FALSE	CAMK1G	24.3333	6	0	0	0.75798	FALSE	0	CAMK1G	988	0.433333
149	3.41091	0.00274763	0.293177	0.333333	6	7	FALSE	E2F1	14.6667	6	0	0	0.732121	FALSE	0	E2F1	2920	0.222222
156	2.74182	0.00152842	0.364721	0.4	6	6	FALSE	RPS6KA6	35.5	6	0	0	0.806465	FALSE	0	RPS6KA6	3166	0.261029
160	3.28364	0.00576431	0.30454	0.0666667	6	7	FALSE	MEF2A	20.8333	6	0	0	0.746263	FALSE	0	MEF2A	4158	0.310256
173	3.42182	0.0138172	0.292242	0.0666667	6	7	FALSE	ESR1	8	6	0	0	0.730909	FALSE	0	ESR1	10958	0.203704
288	4.32	0.00727273	0.231481	0.666667	6	8	FALSE	FGF20	7.16667	6	0	0	0.631111	FALSE	0	FGF20	7808	0.583333
438	2.63273	0.0568195	0.379834	0.2	6	5	FALSE	TXNDC2	30.3333	6	0	0	0.818586	FALSE	0	TXNDC2	46696	0.25
1360	3.46182	4.229e-05	0.288866	0.133333	6	7	FALSE	SH3PXD2B	30.3333	6	0	0	0.726465	FALSE	0	SH3PXD2B	58	0.662963
1415	4.15273	0.0114219	0.240806	0.533333	6	7	FALSE	AARS2	8.16667	6	0	0	0.649697	FALSE	0	AARS2	10194	0.314103
1433	4.02182	0.00105643	0.248644	0.6	6	7	FALSE	ACSM3	14.5	6	0	0	0.664242	FALSE	0	ACSM3	428	0.409524
1462	4.05455	0.00017024	0.246637	0.666667	6	7	FALSE	DECR1	12.5	6	0	0	0.660606	FALSE	0	DECR1	64	0.403226
1464	4.06182	2.331e-05	0.246195	0.8	6	7	FALSE	VAT1L	13.1667	6	0	0	0.659798	FALSE	0	VAT1L	16	0.454023
1662	4.26545	0	0.234442	1	6	8	FALSE	NOTUM	8.16667	6	0	0	0.637172	FALSE	0	NOTUM	0	0.628205
136	3.26182	9.048e-05	0.306577	0.2	5	6	FALSE	MYLK3	26.8	5	0	0	0.748687	FALSE	0	MYLK3	150	0.628571
146	3.26182	9.048e-05	0.306577	0.2	5	6	FALSE	MYLK4	26.8	5	0	0	0.748687	FALSE	0	MYLK4	150	0.628571
151	3.95273	0.00364757	0.25299	0.4	5	8	FALSE	CCNI	6.4	5	0	0	0.671919	FALSE	0	CCNI	8100	0.442857
185	3.32	0.00190142	0.301205	0	5	7	FALSE	TBPL2	16.8	5	0	0	0.742222	FALSE	0	TBPL2	984	0.228986
285	1.375	0.0654762	0.727273	0.6	5	2	FALSE	SMAD1	4	5	0	0	0.8125	FALSE	0	SMAD1	8	0.5
400	2.88	0.00863115	0.347222	0.3	5	6	FALSE	ZNF184	52.8	5	0	0	0.791111	FALSE	0	ZNF184	5816	0.51068
407	2.89818	0.00728588	0.345044	0.3	5	6	FALSE	VEZF1	52.4	5	0	0	0.789091	FALSE	0	VEZF1	3446	0.516832
424	2.95636	7.49e-05	0.338253	0.6	5	6	FALSE	PFN4	39.4	5	0	0	0.782626	FALSE	0	PFN4	118	0.423656
575	3.95273	0.00364757	0.25299	0.4	5	8	FALSE	CCNG1	6.4	5	0	0	0.671919	FALSE	0	CCNG1	8100	0.442857
579	3.00727	0.00059895	0.332527	0.4	5	7	FALSE	WDR88	35.6	5	0	0	0.77697	FALSE	0	WDR88	742	0.354
584	3.00727	0.00059895	0.332527	0.4	5	7	FALSE	WDR16	35.6	5	0	0	0.77697	FALSE	0	WDR16	742	0.354
1417	4.69091	0.00169378	0.213178	0.6	5	8	FALSE	IARS	6.8	5	0	0	0.589899	FALSE	0	IARS	1214	0.34
1419	4.18182	0.00974581	0.23913	0.6	5	7	FALSE	HARS2	6.8	5	0	0	0.646465	FALSE	0	HARS2	8984	0.34
1444	4.09818	0.00889583	0.244011	0.4	5	7	FALSE	AIFM1	9.4	5	0	0	0.655758	FALSE	0	AIFM1	7262	0.368
1527	3.38545	0.00346286	0.295381	0.4	5	6	FALSE	PDILT	10	5	0	0	0.734949	FALSE	0	PDILT	2862	0.285714
1538	3.34545	0.0082768	0.298913	0.3	5	6	FALSE	PFKP	10.4	5	0	0	0.739394	FALSE	0	PFKP	4332	0.333333
118	3.12727	0.00028937	0.319767	0.166667	4	6	FALSE	ANK1	20	4	0	0	0.763636	FALSE	0	ANK1	294	0.375
192	3.06545	0.00055828	0.326216	0.5	4	7	FALSE	KLC2	25	4	0	0	0.770505	FALSE	0	KLC2	574	0.280899
200	3.55636	0.00031547	0.281186	0.166667	4	7	FALSE	MARK3	7.25	4	0	0	0.71596	FALSE	0	MARK3	152	0.321429
283	1.5	0.0119048	0.666667	0.833333	4	2	FALSE	SMAD6	4.75	4	0	0	0.75	FALSE	0	SMAD6	2	0.59375
329	2.90545	1.315e-05	0.34418	0.5	4	6	FALSE	ZNF276	65.25	4	0	0	0.788283	FALSE	0	ZNF276	82	0.64604
331	2.90545	1.315e-05	0.34418	0.5	4	6	FALSE	ZNF550	65.25	4	0	0	0.788283	FALSE	0	ZNF550	82	0.64604
333	2.90545	1.315e-05	0.34418	0.5	4	6	FALSE	ZFAT	65.25	4	0	0	0.788283	FALSE	0	ZFAT	82	0.64604
335	2.90545	1.315e-05	0.34418	0.5	4	6	FALSE	ZNF214	65.25	4	0	0	0.788283	FALSE	0	ZNF214	82	0.64604
339	2.90545	1.315e-05	0.34418	0.5	4	6	FALSE	KLF12	65.25	4	0	0	0.788283	FALSE	0	KLF12	82	0.64604
341	2.90545	1.315e-05	0.34418	0.5	4	6	FALSE	ZNF483	65.25	4	0	0	0.788283	FALSE	0	ZNF483	82	0.64604
344	2.90545	1.315e-05	0.34418	0.5	4	6	FALSE	ZBTB24	65.25	4	0	0	0.788283	FALSE	0	ZBTB24	82	0.64604
346	2.90545	1.315e-05	0.34418	0.5	4	6	FALSE	CTCFL	65.25	4	0	0	0.788283	FALSE	0	CTCFL	82	0.64604
348	2.90545	1.315e-05	0.34418	0.5	4	6	FALSE	ZNF606	65.25	4	0	0	0.788283	FALSE	0	ZNF606	82	0.64604
351	2.90545	1.315e-05	0.34418	0.5	4	6	FALSE	ZIC5	65.25	4	0	0	0.788283	FALSE	0	ZIC5	82	0.64604
353	2.90545	1.315e-05	0.34418	0.5	4	6	FALSE	BCL6B	65.25	4	0	0	0.788283	FALSE	0	BCL6B	82	0.64604
358	2.90545	1.315e-05	0.34418	0.5	4	6	FALSE	ZSCAN29	65.25	4	0	0	0.788283	FALSE	0	ZSCAN29	82	0.64604
364	2.90545	1.315e-05	0.34418	0.5	4	6	FALSE	ZNF181	65.25	4	0	0	0.788283	FALSE	0	ZNF181	82	0.64604
370	2.90545	1.315e-05	0.34418	0.5	4	6	FALSE	ZXDC	65.25	4	0	0	0.788283	FALSE	0	ZXDC	82	0.64604
374	2.90545	1.315e-05	0.34418	0.5	4	6	FALSE	KLF5	65.25	4	0	0	0.788283	FALSE	0	KLF5	82	0.64604
380	2.90545	1.315e-05	0.34418	0.5	4	6	FALSE	ZNF75D	65.25	4	0	0	0.788283	FALSE	0	ZNF75D	82	0.64604
385	2.90545	1.315e-05	0.34418	0.5	4	6	FALSE	ZNF668	65.25	4	0	0	0.788283	FALSE	0	ZNF668	82	0.64604
390	2.90545	1.315e-05	0.34418	0.5	4	6	FALSE	ZNF300	65.25	4	0	0	0.788283	FALSE	0	ZNF300	82	0.64604
392	2.90545	1.315e-05	0.34418	0.5	4	6	FALSE	ZNF335	65.25	4	0	0	0.788283	FALSE	0	ZNF335	82	0.64604
394	2.90545	1.315e-05	0.34418	0.5	4	6	FALSE	ZNF710	65.25	4	0	0	0.788283	FALSE	0	ZNF710	82	0.64604
396	2.90545	1.315e-05	0.34418	0.5	4	6	FALSE	ZNF81	65.25	4	0	0	0.788283	FALSE	0	ZNF81	82	0.64604
405	2.90545	1.315e-05	0.34418	0.5	4	6	FALSE	ZIM2	65.25	4	0	0	0.788283	FALSE	0	ZIM2	82	0.64604
413	2.90545	1.315e-05	0.34418	0.5	4	6	FALSE	ZNF646	65.25	4	0	0	0.788283	FALSE	0	ZNF646	82	0.64604
415	2.90545	1.315e-05	0.34418	0.5	4	6	FALSE	ZNF287	65.25	4	0	0	0.788283	FALSE	0	ZNF287	82	0.64604
418	2.90545	1.315e-05	0.34418	0.5	4	6	FALSE	ZBTB48	65.25	4	0	0	0.788283	FALSE	0	ZBTB48	82	0.64604
420	2.90545	1.315e-05	0.34418	0.5	4	6	FALSE	ZNF142	65.25	4	0	0	0.788283	FALSE	0	ZNF142	82	0.64604
427	2.90545	1.315e-05	0.34418	0.5	4	6	FALSE	ZNF362	65.25	4	0	0	0.788283	FALSE	0	ZNF362	82	0.64604
530	3.54909	0.0001124	0.281762	0.5	4	7	FALSE	ARHGEF10L	8.5	4	0	0	0.716768	FALSE	0	ARHGEF10L	46	0.326923
560	3.27636	3.731e-05	0.305216	0.166667	4	6	FALSE	ATP2B3	30.25	4	0	0	0.747071	FALSE	0	ATP2B3	118	0.762821
565	3.13455	0.00011753	0.319026	0.5	4	7	FALSE	ZRANB3	26.75	4	0	0	0.762828	FALSE	0	ZRANB3	84	0.311047
572	3.13455	0.00011753	0.319026	0.5	4	7	FALSE	SMARCAL1	26.75	4	0	0	0.762828	FALSE	0	SMARCAL1	84	0.311047
599	3.27636	3.731e-05	0.305216	0.166667	4	6	FALSE	CAMKV	30.25	4	0	0	0.747071	FALSE	0	CAMKV	118	0.762821
622	3.27636	3.731e-05	0.305216	0.166667	4	6	FALSE	PSKH2	30.25	4	0	0	0.747071	FALSE	0	PSKH2	118	0.762821
710	3.41091	0.014814	0.293177	0.166667	4	7	FALSE	CSNK2A2	18.25	4	0	0	0.732121	FALSE	0	CSNK2A2	7348	0.277344
743	3.35636	0.0166137	0.297942	0	4	6	FALSE	PDZD2	8	4	0	0	0.738182	FALSE	0	PDZD2	5600	0.25
1217	3.40364	0.00011481	0.293803	0.333333	4	7	FALSE	SSH1	28.25	4	0	0	0.732929	FALSE	0	SSH1	248	0.538462
1425	5.13455	0.00727273	0.194759	0.5	4	8	FALSE	DARS2	4.25	4	0	0	0.540606	FALSE	0	DARS2	5944	0.666667
1484	3.40364	0.0145189	0.293803	0.166667	4	6	FALSE	GK5	7.5	4	0	0	0.732929	FALSE	0	GK5	5006	0.35
1500	3.86909	0.0009108	0.258459	0.333333	4	7	FALSE	DNAJC3	7.75	4	0	0	0.681212	FALSE	0	DNAJC3	358	0.369048
123	3.45455	0.00015705	0.289474	0.666667	3	7	FALSE	ARHGAP36	18	3	0	0	0.727273	FALSE	0	ARHGAP36	124	0.409091
153	3.02545	0.0033633	0.330529	0	3	6	FALSE	CLTC	47.3333	3	0	0	0.774949	FALSE	0	CLTC	5644	0.626126
174	4.40364	0.00727273	0.227085	0.333333	3	8	FALSE	NCOA1	3.33333	3	0	0	0.621818	FALSE	0	NCOA1	6460	0.428571
176	3.80727	0.00235028	0.262655	0.333333	3	7	FALSE	ESR2	4.66667	3	0	0	0.688081	FALSE	0	ESR2	2668	0.393939
184	3.78545	0.00026205	0.264169	0	3	7	FALSE	GTF2E1	7.66667	3	0	0	0.690505	FALSE	0	GTF2E1	74	0.392157
534	3.49818	0.00011719	0.285863	0.333333	3	7	FALSE	PDLIM1	12.6667	3	0	0	0.722424	FALSE	0	PDLIM1	62	0.411111
614	3.49455	2.93e-06	0.28616	0.333333	3	7	FALSE	PEX1	31	3	0	0	0.722828	FALSE	0	PEX1	8	0.87619
625	3.48	0.00035204	0.287356	0.333333	3	7	FALSE	CAMKK1	23.3333	3	0	0	0.724444	FALSE	0	CAMKK1	392	0.621622
720	3.41091	5.91e-06	0.293177	0.333333	3	7	FALSE	JDP2	34.3333	3	0	0	0.732121	FALSE	0	JDP2	4	0.666667
751	3.42182	6e-07	0.292242	0.666667	3	7	FALSE	DUSP27	34.3333	3	0	0	0.730909	FALSE	0	DUSP27	2	0.686667
826	3.16364	0.00037255	0.316092	0.666667	3	7	FALSE	KLC3	28	3	0	0	0.759596	FALSE	0	KLC3	408	0.358974
844	3.42182	6e-07	0.292242	0.666667	3	7	FALSE	EPM2A	34.3333	3	0	0	0.730909	FALSE	0	EPM2A	2	0.686667
887	3.52364	0.00109626	0.283798	0	3	7	FALSE	NTN3	7.33333	3	0	0	0.719596	FALSE	0	NTN3	1206	0.351852
1421	5.14182	0	0.194484	1	3	8	FALSE	TARSL2	5.33333	3	0	0	0.539798	FALSE	0	TARSL2	0	0.888889
1447	4.93091	0.00036616	0.202802	0.333333	3	8	FALSE	PEPD	7.33333	3	0	0	0.563232	FALSE	0	PEPD	140	0.411765
1471	4.92364	4.008e-05	0.203102	0	3	8	FALSE	D2HGDH	12.6667	3	0	0	0.56404	FALSE	0	D2HGDH	42	0.648148
1496	4.13818	0	0.241652	1	3	7	FALSE	EIF5A2	15.3333	3	0	0	0.651313	FALSE	0	EIF5A2	0	0.528736
1525	4.09091	0.00015793	0.244444	0.666667	3	7	FALSE	TXNDC16	10.6667	3	0	0	0.656566	FALSE	0	TXNDC16	52	0.426667
1646	1.625	0	0.615385	1	3	2	FALSE	BMP15	5.66667	3	0	0	0.6875	FALSE	0	BMP15	0	0.708333
1648	1.625	0	0.615385	1	3	2	FALSE	GDF3	5.66667	3	0	0	0.6875	FALSE	0	GDF3	0	0.708333
162	3.42545	6e-07	0.291932	0	2	7	FALSE	DUSP7	46.5	2	0	0	0.730505	FALSE	0	DUSP7	2	0.947917
195	3.49455	0	0.28616	1	2	7	FALSE	LPIN1	22	2	0	0	0.722828	FALSE	0	LPIN1	0	1
219	3.73818	3.128e-05	0.26751	0	2	7	FALSE	SLIT2	7.5	2	0	0	0.695758	FALSE	0	SLIT2	12	0.541667
263	4.70545	0	0.212519	1	2	8	FALSE	DPYS	11.5	2	0	0	0.588283	FALSE	0	DPYS	0	0.676471
265	4.70545	0	0.212519	1	2	8	FALSE	DPYSL2	11.5	2	0	0	0.588283	FALSE	0	DPYSL2	0	0.676471
267	3.89091	0	0.257009	1	2	7	FALSE	DNAJC5B	11.5	2	0	0	0.678788	FALSE	0	DNAJC5B	0	0.638889
278	1	1	1	0	2	1	FALSE	LRP2	1	2	0	0	1	FALSE	0	LRP2	2	0
281	1.75	0	0.571429	1	2	2	FALSE	NODAL	6.5	2	0	0	0.625	FALSE	0	NODAL	0	0.8125
301	3.73818	3.128e-05	0.26751	0	2	7	FALSE	SLIT1	7.5	2	0	0	0.695758	FALSE	0	SLIT1	12	0.541667
521	3.12364	0.00017471	0.32014	0	2	6	FALSE	ANKFY1	35	2	0	0	0.76404	FALSE	0	ANKFY1	460	0.62963
524	3.12364	0.00017471	0.32014	0	2	6	FALSE	ANKRD29	35	2	0	0	0.76404	FALSE	0	ANKRD29	460	0.62963
536	3.71273	0	0.269344	1	2	7	FALSE	ARHGEF15	11.5	2	0	0	0.698586	FALSE	0	ARHGEF15	0	0.958333
544	3.12364	0.00017471	0.32014	0	2	6	FALSE	ASB10	35	2	0	0	0.76404	FALSE	0	ASB10	460	0.62963
547	3.12364	0.00017471	0.32014	0	2	6	FALSE	ASB13	35	2	0	0	0.76404	FALSE	0	ASB13	460	0.62963
550	3.12364	0.00017471	0.32014	0	2	6	FALSE	ASB14	35	2	0	0	0.76404	FALSE	0	ASB14	460	0.62963
553	3.54909	0	0.281762	1	2	7	FALSE	ASH1L	34	2	0	0	0.716768	FALSE	0	ASH1L	0	0.576271
557	3.12364	0.00017471	0.32014	0	2	6	FALSE	ASZ1	35	2	0	0	0.76404	FALSE	0	ASZ1	460	0.62963
596	3.54909	0	0.281762	1	2	7	FALSE	SETD8	34	2	0	0	0.716768	FALSE	0	SETD8	0	0.576271
689	4.94182	5.31e-06	0.202355	0	2	9	FALSE	PTPDC1	5	2	0	0	0.56202	FALSE	0	PTPDC1	2	1
727	4.4	0.00727273	0.227273	0	2	8	FALSE	SPAG6	2.5	2	0	0	0.622222	FALSE	0	SPAG6	3600	0.5
739	3.80364	0.00057247	0.262906	0	2	7	FALSE	DCHS2	8.5	2	0	0	0.688485	FALSE	0	DCHS2	192	0.5
782	3.2	0	0.3125	1	2	7	FALSE	PPIH	40	2	0	0	0.755556	FALSE	0	PPIH	0	0.533333
876	3.58545	1.017e-05	0.278905	0	2	7	FALSE	FOXF1	10	2	0	0	0.712727	FALSE	0	FOXF1	4	0.5625
879	3.58545	1.017e-05	0.278905	0	2	7	FALSE	FOXK1	10	2	0	0	0.712727	FALSE	0	FOXK1	4	0.5625
1012	3.12364	0.00017471	0.32014	0	2	6	FALSE	TANC2	35	2	0	0	0.76404	FALSE	0	TANC2	460	0.62963
1014	3.12364	0.00017471	0.32014	0	2	6	FALSE	SNCAIP	35	2	0	0	0.76404	FALSE	0	SNCAIP	460	0.62963
1498	4.67273	0	0.214008	1	2	8	FALSE	PPAT	11.5	2	0	0	0.591919	FALSE	0	PPAT	0	0.638889
1505	3.89091	0	0.257009	1	2	7	FALSE	DNAJC30	11.5	2	0	0	0.678788	FALSE	0	DNAJC30	0	0.638889
1543	4.21091	0.00727273	0.237478	0	2	7	FALSE	PGM2L1	7.5	2	0	0	0.643232	FALSE	0	PGM2L1	2406	0.5
1546	1	0	1	1	2	1	FALSE	FBXO18	2	2	0	0	1	FALSE	0	FBXO18	0	1
1547	1	0	1	1	2	1	FALSE	GEN1	2	2	0	0	1	FALSE	0	GEN1	0	1
1549	1	0	1	1	2	1	FALSE	MSH4	2	2	0	0	1	FALSE	0	MSH4	0	1
1617	5.00364	1.9e-06	0.199855	0	2	8	FALSE	ACMSD	14.5	2	0	0	0.555152	FALSE	0	ACMSD	2	0.964286
1622	5.00364	1.9e-06	0.199855	0	2	8	FALSE	GFOD1	14.5	2	0	0	0.555152	FALSE	0	GFOD1	2	0.964286
1628	1	1	1	0	2	1	FALSE	WFDC8	1	2	0	0	1	FALSE	0	WFDC8	2	0
1634	1	1	1	0	2	1	FALSE	CTRC	1	2	0	0	1	FALSE	0	CTRC	2	0
182	3.82182	0	0.261656	0	1	7	FALSE	SPOPL	9	1	0	0	0.686465	FALSE	0	SPOPL	0	0
277	1.5	0	0.666667	0	1	2	FALSE	LDLRAP1	2	1	0	0	0.75	FALSE	0	LDLRAP1	0	0
287	5.31636	0	0.188099	0	1	9	FALSE	FGF18	6	1	0	0	0.520404	FALSE	0	FGF18	0	0
519	3.32727	0	0.300546	0	1	6	FALSE	ANKDD1A	39	1	0	0	0.741414	FALSE	0	ANKDD1A	0	0
527	3.32727	0	0.300546	0	1	6	FALSE	ANKRD60	39	1	0	0	0.741414	FALSE	0	ANKRD60	0	0
680	3.32727	0	0.300546	0	1	6	FALSE	CASKIN1	39	1	0	0	0.741414	FALSE	0	CASKIN1	0	0
717	3.65818	0	0.27336	0	1	7	FALSE	CRADD	31	1	0	0	0.704646	FALSE	0	CRADD	0	0
749	3.70545	0	0.269872	0	1	7	FALSE	DLK1	29	1	0	0	0.699394	FALSE	0	DLK1	0	0
759	3.32727	0	0.300546	0	1	6	FALSE	EFCAB1	39	1	0	0	0.741414	FALSE	0	EFCAB1	0	0
812	3.21091	0	0.311438	0	1	7	FALSE	RAB14	73	1	0	0	0.754343	FALSE	0	RAB14	0	0
868	4.35273	0	0.229741	0	1	7	FALSE	FAT3	4	1	0	0	0.627475	FALSE	0	FAT3	0	0
892	3.47273	0	0.287958	0	1	6	FALSE	GCK	14	1	0	0	0.725253	FALSE	0	GCK	0	0
944	1	0	1	0	1	1	FALSE	HECW1	1	1	0	0	1	FALSE	0	HECW1	0	0
945	1	0	1	0	1	1	FALSE	TEAD1	1	1	0	0	1	FALSE	0	TEAD1	0	0
947	3.32727	0	0.300546	0	1	6	FALSE	HPCA	39	1	0	0	0.741414	FALSE	0	HPCA	0	0
950	3.96364	0	0.252294	0	1	7	FALSE	IGSF22	13	1	0	0	0.670707	FALSE	0	IGSF22	0	0
952	1	0	1	0	1	1	FALSE	IPO7	1	1	0	0	1	FALSE	0	IPO7	0	0
953	1	0	1	0	1	1	FALSE	KPNA3	1	1	0	0	1	FALSE	0	KPNA3	0	0
971	5.39636	0	0.18531	0	1	9	FALSE	KIF27	2	1	0	0	0.511515	FALSE	0	KIF27	0	0
1017	3.32727	0	0.300546	0	1	6	FALSE	PCSK1	39	1	0	0	0.741414	FALSE	0	PCSK1	0	0
1256	3.84	0	0.260417	0	1	7	FALSE	PITX1	7	1	0	0	0.684444	FALSE	0	PITX1	0	0
1302	5.4	0	0.185185	0	1	9	FALSE	NR2E1	3	1	0	0	0.511111	FALSE	0	NR2E1	0	0
1326	4.35273	0	0.229741	0	1	7	FALSE	SVEP1	4	1	0	0	0.627475	FALSE	0	SVEP1	0	0
1328	3.38545	0	0.295381	0	1	6	FALSE	PEF1	28	1	0	0	0.734949	FALSE	0	PEF1	0	0
1358	3.57455	0	0.279756	0	1	7	FALSE	TBC1D14	33	1	0	0	0.713939	FALSE	0	TBC1D14	0	0
1413	3.89455	0	0.256769	0	1	7	FALSE	UNCX	5	1	0	0	0.678384	FALSE	0	UNCX	0	0
1427	5.05455	0	0.197842	0	1	8	FALSE	ABHD14B	9	1	0	0	0.549495	FALSE	0	ABHD14B	0	0
1431	5.05455	0	0.197842	0	1	8	FALSE	LIPJ	9	1	0	0	0.549495	FALSE	0	LIPJ	0	0
1483	4.4	0	0.227273	0	1	7	FALSE	AQP6	4	1	0	0	0.622222	FALSE	0	AQP6	0	0
1514	6.13091	0	0.163108	0	1	9	FALSE	MTRF1L	4	1	0	0	0.429899	FALSE	0	MTRF1L	0	0
1517	4.21818	0	0.237069	0	1	7	FALSE	DDX18	14	1	0	0	0.642424	FALSE	0	DDX18	0	0
1519	4.21818	0	0.237069	0	1	7	FALSE	DDX20	14	1	0	0	0.642424	FALSE	0	DDX20	0	0
1559	5.20727	0	0.192039	0	1	8	FALSE	GNPDA1	2	1	0	0	0.532525	FALSE	0	GNPDA1	0	0
1592	4.24727	0	0.235445	0	1	7	FALSE	SLC16A2	13	1	0	0	0.639192	FALSE	0	SLC16A2	0	0
1605	3.62909	0	0.275551	0	1	6	FALSE	MSRA	6	1	0	0	0.707879	FALSE	0	MSRA	0	0
1610	4.34182	0	0.230318	0	1	7	FALSE	PMM2	5	1	0	0	0.628687	FALSE	0	PMM2	0	0
1620	5.09455	0	0.196288	0	1	8	FALSE	NDUFS5	5	1	0	0	0.545051	FALSE	0	NDUFS5	0	0
1625	4.4	0	0.227273	0	1	7	FALSE	AQP4	4	1	0	0	0.622222	FALSE	0	AQP4	0	0
1627	1.5	0	0.666667	0	1	2	FALSE	ACR	2	1	0	0	0.75	FALSE	0	ACR	0	0
1630	1	0	1	0	1	1	FALSE	APLP2	1	1	0	0	1	FALSE	0	APLP2	0	0
1631	1	0	1	0	1	1	FALSE	PRSS36	1	1	0	0	1	FALSE	0	PRSS36	0	0
1633	1.5	0	0.666667	0	1	2	FALSE	CPA1	2	1	0	0	0.75	FALSE	0	CPA1	0	0
1636	1.5	0	0.666667	0	1	2	FALSE	CPA6	2	1	0	0	0.75	FALSE	0	CPA6	0	0
1638	1.5	0	0.666667	0	1	2	FALSE	SDC3	2	1	0	0	0.75	FALSE	0	SDC3	0	0
1640	1.5	0	0.666667	0	1	2	FALSE	SERPINB11	2	1	0	0	0.75	FALSE	0	SERPINB11	0	0
1642	1.875	0	0.533333	0	1	2	FALSE	GDF2	8	1	0	0	0.5625	FALSE	0	GDF2	0	0
1644	1.875	0	0.533333	0	1	2	FALSE	GDF5	8	1	0	0	0.5625	FALSE	0	GDF5	0	0
1650	1.875	0	0.533333	0	1	2	FALSE	INHA	8	1	0	0	0.5625	FALSE	0	INHA	0	0
1669	5.25091	0	0.190443	0	1	9	FALSE	OTX2	8	1	0	0	0.527677	FALSE	0	OTX2	0	0
