# Supplementary material for: Identification of hydatidosis-related modules and key regulatory genes
Source: PeerJ. 2020 Jun 18;8:e9280. doi: 10.7717/peerj.9280 (PMC7306218; doi:10.7717/peerj.9280)
Supplement: Supplemental Information 6 [file peerj-08-9280-s006.xlsx]

## Sheet: human
Table S6.ncRNA Driving the Pathogenic Module of Human Hydatidosis
miR-494-3p
miR-590-3p
miR-33b-5p
miR-449a
miR-3653-3p
miR-1297
miR-155-5p
let-7b-5p
miR-376c-3p
miR-320d
miR-411-5p
miR-301a-3p
miR-423-3p
miR-342-3p
miR-26a-5p
miR-222-3p
miR-203a-3p
miR-454-3p
let-7c-5p
miR-708-5p
miR-26b-5p
miR-488-3p
miR-320c
miR-199b-5p
miR-129-5p
miR-202-3p
miR-499a-5p
miR-136-5p
miR-371a-5p
miR-3973
CRNDE
miR-17-5p
miR-320b
miR-320a
miR-143-3p
miR-28-5p
miR-27a-3p
miR-128-3p
miR-31-5p
RNU1-1
miR-30a-5p
miR-877-3p
miR-300
miR-330-5p
miR-615-3p
miR-194-5p
miR-181b-5p
miR-183-5p
miR-181c-5p
miR-149-5p
miR-382-5p
miR-92a-3p
miR-197-3p
miR-744-5p
miR-599
let-7e-5p
miR-212-3p
miR-506-3p
miR-422a
miR-378a-3p
FENDRR
miR-384
miR-495-3p
miR-329-3p
miR-379-5p
miR-627-3p
miR-93-3p
miR-193b-3p
miR-103a-3p
miR-324-5p
miR-543
miR-27b-3p
miR-224-5p
miR-425-5p
miR-548c-3p
miR-146a-5p
MALAT1
miR-23b-3p
miR-539-5p
miR-139-5p
miR-208a-3p
miR-7-2-3p
miR-16-5p
miR-135b-5p
miR-134-5p
miR-331-3p
miR-186-5p
miR-24-3p
miR-193a-5p
miR-23a-3p
miR-374a-5p
miR-340-5p
miR-140-5p
miR-18a-3p
miR-146b-5p
miR-221-3p
miR-370-3p
miR-1229-3p
miR-216a-5p
miR-381-3p
miR-141-3p
miR-132-3p
miR-410-3p
miR-590-5p
miR-216b-5p
miR-448
miR-500a-3p
miR-421
miR-150-5p
miR-361-5p
miR-653-5p
miR-505-3p
miR-218-5p
miR-363-3p
miR-4786-5p
miR-30c-1-3p
miR-887-5p
miR-30b-3p
miR-6747-3p
miR-6780a-5p
miR-548ai
miR-3689c
miR-1273h-5p
miR-195-5p
miR-25-3p
miR-548ah-5p
miR-338-5p
miR-484
miR-455-5p
miR-206
miR-671-5p
miR-503-5p
miR-3682-3p
miR-3163
miR-613
miR-10b-5p
miR-3622b-5p
miR-3935
miR-376a-2-5p
miR-7703
let-7c-3p
miR-4266
miR-4793-3p
miR-6804-5p
VTRNA1-1
BCYRN1
mir-125b-2
miR-935
miR-6888-5p
miR-877-5p
miR-4324
miR-1909-3p
PDK3
EMG1
mir-92a-1
ZNF518A
miR-6080
PPP1R9B
UBXN8
miR-4321
miR-4651
ZNF761
CASP8AP2
MAP3K14
miR-1296-5p
mir-3687-1
C11orf95
let-7f-1
mir-4709
mir-181a-1
mir-181a-2
KIZ
mir-5006
mir-4690
VPS11
mir-4685
mir-4444-1
RECQL4
mir-5010
SLC38A3
SNORD90
XIST
SNHG12
MATN1-AS1
TTLL7-IT1
SNHG6
LINC00271
MIAT
SNORD117
SNHG7
SNORA24
PYY2
SNORD36C
SNORD80
SNORA2B
LINC00184
PSMG3-AS1
PTENP1
SNHG15
SNHG1
SNORD89
TMEM161B-AS1
LINC00319
LINC00304
RN7SKP173
LINC00152
HCG18
MMP24-AS1
SNORD68
DGCR5
SNORD5
RMRP
TERC
MIR99AHG
THAP9-AS1
SNORD35B
FAM13A-AS1
SNORA77
SNORD25
LINC00641
SNORD81
SNORD1A
SNORD105B
LINC00115
SNORD58A
SNORD91A
RPL29P2
SNORD97
WHAMMP3
SNHG16
SENP3-EIF4A1
LINC00511
SNORD50A
CCAT1
LBX2-AS1
STARD4-AS1
SCARNA16
WWTR1-AS1
ARHGAP5-AS1
SNORD79
EXTL3-AS1
SNORD66
SNORD46
SIK3-IT1
SNORA74A
SNHG10
LINC00668
SNORD98
LINC00205
HOTAIR
SNORD12
HOTTIP
SCARNA15
LINC00339
DAPK1-IT1
UBE2Q2P2
TMEM51-AS1
RPS10P7
RASAL2-AS1
SNORA81
ZFAS1
SNORD116-29
TP73-AS1
PTCHD3P1
FOXD2-AS1
SCARNA9
H19
OPLAH
OIP5-AS1
PDXDC2P
TMEM44-AS1
LINC00842
EPS15P1
MID1IP1-AS1
RNA5-8SP4
SNORD84
SNORD53
LIFR-AS1
LINC00323
PHKA2-AS1
SNORD116-26
PRRT3-AS1
LINC00607
SNORD92
SNORA69
DYX1C1-CCPG1
CBR3-AS1
GABPB1-AS1
PTOV1-AS1
HAGLR
SNORD22
CDKN2B-AS1
LINC00521
CCDC183-AS1
NBR2
HCG17
SCARNA1
SNORD91B
TTN-AS1
LINC00106
LENG8-AS1
ILF3-AS1
DNAJC3-AS1
SNORD116-20
SNORD116-11
SEC24B-AS1
TSTD3
SCARNA13
LINC00475
SNORD111
LINC00665
SOS1-IT1
KDM4A-AS1
LRRC75A-AS1
C1RL-AS1
RAB11B-AS1
WAC-AS1
WDFY3-AS2
LINC00667
FLG-AS1
FBXL19-AS1
COX10-AS1
IPO9-AS1
FOXN3-AS1
PRKAG2-AS1
CASC2
H1FX-AS1
SNHG20
AATK-AS1
SBF2-AS1
GNG12-AS1
AGAP11
STK4-AS1
NORAD
LINC00689
PLCB1-IT1
CECR7
BOLA3-AS1
SNHG14
LINC00342
RNU6ATAC3P
SMIM10L2B
LINC00562
SNORD45C
CTBP1-AS2
ZNRD1-AS1
SEMA6A-AS1
HOXA11-AS
RN7SKP184
RNA5-8SP5
LINC00493
SNORD116-15
LINC00663
NOP14-AS1
DIP2A-IT1
SH3BP5-AS1
LINC00659
KLF7-IT1
NEXN-AS1
RNU5E-6P
TMEM254-AS1
ERI3-IT1
ZBED3-AS1
LINC00707
PRR7-AS1
PINK1-AS
RN7SKP202
ACTA2-AS1
SNORD116-5
HLCS-IT1
PI4KAP1
FAM95B1
MIR497HG
PSMD6-AS2
LINC00243
LINC00672
NPPA-AS1
RFPL1S
FAM225A
SNORD55
SLX1A-SULT1A3
ATP6V0E2-AS1
SNORD116-22
NSUN6
DBH-AS1
ASH1L-AS1
ENO1-IT1
SRRM2-AS1
CRYM-AS1
SNORD116-3
CD99P1
SNORD115-33
FOXP1-IT1
INTS6-AS1
HOXC-AS3
RNU6ATAC2P
ZNF503-AS2
MANEA-AS1
LINC00467
SNORD3C
PXN-AS1
AGAP1-IT1
LINC00680
DNAJC27-AS1
SNORD116-24
MIR22HG
SNAI3-AS1
BRWD1-IT2
FAM157B
RNU4ATAC16P
ANKRD44-IT1
ATP1A1-AS1
MIR924HG
LAMTOR5-AS1
SZT2-AS1
FLNB-AS1
CACNA2D3-AS1
SNORD116-2
LPP-AS2
SPAG5-AS1
AMMECR1-IT1
ENTPD3-AS1
ST7-AS1
LINC00167
TM4SF19-AS1
NUTM2A-AS1
LINC00601
SNX29P2
LINC00856
APCDD1L-AS1
RNU4ATAC14P
ZNF346-IT1
PDCD4-AS1
SNORD109A
FAM157C
RC3H1-IT1
RN7SKP23
LINC00639
LINC00514
MIR181A2HG
LOC101929566
LINC00565
SIX3-AS1
FAM138E
ZNF888
VTRNA2-1
RNY5
miR-4529-5p
mir-3064
CABIN1
MAL2
SLC37A4
POLDIP2
CWC15
JRK
SPPL2B
DANCR
LINC00094
PVT1
SNORD87
WDR7-OT1
SNORD65
RNU2-6P
DLEU2
SEPT7P2
FTX
OLMALINC
SNHG9
SNORD12B
RNF216-IT1
RNU7-1
SNORD14B
SNORD45A
RNU5A-8P
TPT1-AS1
SNORD3B-2
SNORD93
SNHG5
OTUD6B-AS1
SNORD32A
SCARNA2
ZNF37BP
NEAT1
SNORA55
TAPT1-AS1
PCBP1-AS1
SNORA36A
RNU2-2P
EPB41L4A-AS1
LINC00472
ENTPD1-AS1
LINC00313
LINC01194
MCM3AP-AS1
TRAF3IP2-AS1
SNHG3
LINC00630
ANKRD10-IT1
NDUFB2-AS1
SUZ12P1
LINC00473
RN7SL648P
CROCCP2
KTN1-AS1
FGD5-AS1
BCDIN3D-AS1
C9orf106
TEN1-CDK3
RNU6-39P
RNA5SP202
MAGI1-IT1
LIMD1-AS1
TBC1D3P1-DHX40P1
DLGAP1-AS1
FER1L4
LINC00176
LINC00857
GNAS-AS1
TMPO-AS1
ASB16-AS1
TTC28-AS1
RN7SKP30
THRB-IT1
DHRS4-AS1
MAP3K14-AS1
IQCH-AS1
RNU6-2
APTR
KIF9-AS1
PAN3-AS1
SMYD3-IT1
ERVK13-1
RNA5SP259
TCL6
RN7SL535P
HCP5
miR-1-3p
RNY1
miR-486-5p
miR-647
mir-6723
mir-92a-2
mir-19b-2
RPPH1
HOTAIRM1
CRHR1-IT1
LINC00341
MAFG-AS1
ADPGK-AS1
HLA-F-AS1
NUTM2D
PSORS1C3
LINC00670
MIR137HG
GS1-124K5.11
LINC00539
ZMIZ1-AS1
miR-6788-5p
miR-873-5p
miR-296-3p
miR-1260b
miR-6833-5p
miR-4261
miR-577
miR-4728-3p
miR-6812-5p
miR-4277
miR-4536-3p
miR-4477a
miR-4738-3p
HELLPAR
miR-183-3p
MIR17HG
RNA5-8SP6
FAM157A
RNU6ATAC30P
FOXO3B
RNU6ATAC25P
DTX2P1-UPK3BP1-PMS2P11
RNA5-8SP2
LINC00266-1
FOXI3
RNU6ATAC31P
DICER1-AS1
LINC00265
ZNF833P
NDUFA6-AS1
GOLGA2P2Y
SLX1B-SULT1A4
miR-3147
miR-6744-5p
miR-487b-3p
miR-3668
TUNAR
THUMPD3-AS1
CLUHP3
ZNF205-AS1
A1BG-AS1
LINC00174
miR-615-3p
miR-425-5p
miR-3142
miR-1245b-5p
FENDRR
miR-383-3p
miR-421
miR-92a-3p
RN7SL1
miR-423-5p
miR-451b
miR-331-3p
miR-6808-5p
miR-6747-3p
miR-4526
miR-4722-3p
miR-3660
miR-450b-5p
miR-376a-3p
miR-186-5p
BCYRN1
miR-134-5p
miR-4422
miR-324-5p
miR-18a-3p
miR-212-5p
UCN2
RNU1-1
miR-589-3p
miR-17-3p
miR-100-5p
miR-1260b
miR-665
miR-193b-3p
miR-6849-3p
miR-6860
miR-6790-3p
miR-877-5p
miR-766-3p
miR-4736
miR-652-3p
miR-510-3p
miR-1180-3p
miR-340-3p
miR-744-5p
miR-431-5p
miR-484
miR-3613-3p
miR-324-3p
miR-935
miR-6771-3p
miR-1227-3p
miR-769-3p
miR-4433a-5p
miR-548aj-3p
miR-92a-1-5p
miR-3160-3p
miR-4522
miR-941
miR-4679
miR-3065-5p
miR-10b-3p
let-7g-3p
miR-6744-3p
miR-6813-3p
miR-6499-3p
miR-6087
miR-335-5p
miR-3927-5p
miR-4486
miR-6512-3p
miR-6849-3p
miR-766-3p
CRNDE
miR-30a-5p
miR-186-5p
miR-30c-5p
miR-19a-3p
miR-539-5p
miR-1250-3p
miR-346
miR-212-3p
miR-19b-3p
miR-497-3p
miR-421
miR-154-5p
miR-653-5p
miR-26b-5p
miR-340-3p
miR-144-3p
miR-101-3p
miR-208b-3p
miR-590-3p
TUG1
miR-26a-5p
FENDRR
miR-93-5p
let-7b-5p
miR-381-3p
miR-204-5p
miR-495-3p
miR-34b-5p
miR-30e-5p
miR-30b-5p
miR-125b-5p
miR-125a-5p
miR-331-3p
miR-16-5p
miR-142-3p
miR-148a-3p
miR-324-3p
miR-92a-3p
miR-342-3p
miR-107
miR-152-3p
miR-196b-5p
miR-302a-3p
miR-708-5p
let-7i-5p
miR-148b-3p
miR-520d-3p
miR-6848-3p
miR-193b-3p
miR-10a-5p
MALAT1
miR-484
miR-372-3p
miR-224-5p
miR-520e
miR-1343-5p
miR-34c-5p
miR-139-5p
miR-146a-5p
miR-3667-5p
miR-4756-3p
miR-208b-5p
miR-422a
miR-520f-3p
miR-425-3p
miR-605-5p
miR-211-3p
miR-3942-3p
let-7b-3p
miR-10a-3p
miR-380-5p
miR-5197-3p
miR-211-5p
miR-485-5p
miR-15a-5p
miR-497-5p
miR-15b-5p
miR-140-5p
miR-491-5p
miR-6747-5p
MALAT1
miR-16-5p
miR-218-5p
miR-203a-3p
miR-135a-5p
miR-202-3p
miR-223-3p
miR-215-5p
let-7a-5p
miR-107
miR-128-3p
miR-17-5p
miR-132-3p
miR-410-3p
miR-124-3p
miR-195-5p
miR-183-5p
miR-106b-5p
miR-221-3p
miR-149-5p
miR-182-5p
miR-30a-5p
miR-186-5p
miR-5687
miR-188-3p
miR-613
TUG1
miR-302b-3p
miR-10a-5p
miR-30a-3p
miR-302e
miR-302d-3p
miR-590-3p
miR-520c-3p
miR-424-5p
miR-520b
miR-302a-3p
miR-432-5p
miR-185-5p
miR-199b-5p
miR-324-5p
miR-378a-3p
miR-93-5p
miR-300
miR-494-3p
miR-138-5p
miR-182-3p
FENDRR
miR-381-3p
miR-361-5p
miR-449b-3p
miR-122-5p
miR-30e-5p
miR-224-5p
miR-485-3p
miR-525-3p
miR-6860
CRNDE
miR-342-3p
miR-125a-5p
miR-6513-3p
miR-550a-3p
miR-4712-3p
miR-6817-5p
miR-6790-3p
miR-6821-3p
miR-6504-3p
miR-3116
miR-6878-3p
miR-4768-5p
miR-5589-5p
miR-6833-3p
miR-6766-3p
miR-4441
miR-96-3p
FENDRR
miR-1-3p
miR-378a-5p
miR-335-5p
miR-627-3p
miR-323b-5p
miR-1256
mir-1244-1
mir-3614
miR-1227-3p
miR-3684
mir-92a-1
miR-4660
mir-7-1
miR-5047
mir-16-1
mir-4646
mir-1224
mir-4659a
mir-4781
mir-3679
PPP1R16A
SNORD16
SNORD121B
RNU5B-1
GTSE1-AS1
SNORD74
SNORD80
SNORD101
RNVU1-14
SNORA5C
SNORD47
SNORD72
SMG7-AS1
RNU5F-1
SNORA73B
SNORA3A
SNORA6
SNORA16B
SNORD83A
SNORD18C
SNORD1B
RNU4-1
SNORA64
LOC100288069
SNORA5B
SNORD1A
SNORD51
RNU5E-1
SNORA1
SNHG11
SCARNA2
SNORA62
SNORD38A
SNORD66
SNORD12
SNORD21
SNORD1C
SNORA58
RNU11
ZFAS1
MINOS1P1
SNORA17A
SNORD18B
SNORA44
SNORA38
LOC554174
miR-3672
miR-4524a-3p
miR-4493
miR-4670-3p
miR-30e-5p
miR-494-3p
miR-19a-3p
miR-301a-3p
miR-133b
miR-520c-3p
miR-124-3p
miR-454-3p
miR-335-5p
miR-103a-3p
miR-519b-3p
miR-488-3p
miR-377-3p
miR-96-5p
miR-129-5p
miR-202-3p
miR-133a-3p
FENDRR
miR-1-3p
miR-23b-3p
miR-302c-3p
miR-181a-5p
miR-218-5p
miR-372-3p
miR-301b-3p
miR-520b
miR-27b-3p
miR-181b-5p
miR-181c-5p
miR-128-3p
miR-491-5p
miR-4500
miR-367-3p
miR-613
miR-21-5p
miR-520d-5p
miR-190a-5p
miR-320d
miR-495-3p
miR-150-5p
miR-190b
miR-371a-5p
miR-340-5p
miR-152-3p
miR-34c-5p
miR-424-5p
miR-15a-5p
miR-195-5p
miR-1271-5p
miR-296-3p
miR-214-3p
miR-4732-5p
miR-93-5p
let-7d-5p
miR-106b-5p
miR-136-5p
miR-708-5p
miR-503-5p
miR-224-5p
miR-146a-5p
miR-5003-3p
ANCR
miR-130a-3p
miR-106a-5p
miR-211-5p
miR-381-3p
miR-200c-3p
miR-519d-3p
miR-518c-3p
miR-3125
miR-544a
miR-204-5p
miR-18a-5p
miR-217
miR-27a-3p
miR-1178-3p
miR-154-5p
miR-432-5p
miR-370-5p
miR-5006-5p
miR-638
miR-6756-5p
miR-134-5p
miR-4295
miR-130b-3p
miR-3666
miR-22-3p
miR-371b-5p
miR-372-5p
miR-141-3p
miR-539-5p
miR-28-5p
miR-9-5p
miR-29a-3p
miR-519c-3p
miR-378a-3p
miR-122-5p
miR-140-5p
miR-425-5p
miR-6859-3p
miR-24-3p
miR-485-5p
miR-3689d
miR-4489
miR-330-5p
miR-6784-5p
miR-330-3p
miR-1251-3p
miR-518e-3p
miR-519a-3p
miR-96-3p
miR-4283
miR-423-5p
miR-6083
miR-4708-3p
miR-4735-3p
miR-183-3p
miR-129-1-3p
miR-6508-3p
miR-4680-3p
miR-6760-5p
miR-6759-3p
miR-186-5p
FENDRR
miR-124-3p
miR-195-5p
miR-497-5p
miR-15b-5p
CRNDE
miR-216a-5p
miR-484
miR-514a-3p
miR-193b-3p
miR-92a-3p
miR-323a-3p
miR-106a-5p
miR-93-5p
miR-218-5p
miR-302a-3p
miR-382-5p
miR-30e-3p
miR-30b-5p
miR-4786-5p
miR-4468
miR-323a-5p
miR-550a-3p
miR-32-3p
miR-17-5p
TUG1
miR-30d-5p
miR-30e-5p
miR-302c-3p
miR-4802-5p
miR-215-5p
miR-6500-3p
miR-5187-3p
miR-4680-3p
miR-24-1-5p
miR-5095
miR-7151-3p
miR-144-3p
miR-675-3p
UCA1
miR-29a-3p
miR-6765-5p
miR-126-3p
miR-577
miR-661
TERC
miR-3134
miR-769-5p
miR-5585-5p
miR-8058
miR-3622a-3p
miR-3667-3p
miR-4318
miR-4693-3p
miR-2681-3p
miR-6511b-3p
miR-548au-5p
miR-548aq-5p
miR-548ab
miR-548ay-5p
miR-4727-5p
miR-645
miR-508-5p
miR-4793-3p
miR-1206
miR-6745
miR-363-5p
miR-660-3p
CRNDE
FENDRR
miR-381-3p
miR-3163
miR-150-5p
miR-4755-3p
miR-216b-5p
miR-6771-3p
miR-16-5p
miR-374a-5p
miR-382-5p
miR-6747-3p
miR-890
miR-143-3p
miR-6785-5p
miR-187-3p
miR-6880-5p
SNORD3A
miR-4474-5p
miR-8086
miR-588
RPPH1
miR-6862-5p
miR-6839-3p
miR-3907
miR-4695-3p
miR-6829-3p
miR-4674
miR-17-3p
miR-4537
miR-597-3p
miR-152-5p
miR-1285-5p
miR-4325
miR-3944-5p
miR-4298
miR-4748
miR-676-5p
miR-8087
miR-6509-3p
miR-1912
miR-6749-3p
miR-5701
miR-617
miR-6827-3p
miR-584-5p
miR-16-1-3p
miR-6832-3p
miR-4477b
miR-3656
miR-3938
miR-376c-3p
miR-203a-3p
MALAT1
miR-539-5p
miR-338-3p
miR-5047
miR-590-5p
miR-1178-3p
miR-4779
miR-5691
miR-6738-3p
miR-6805-3p
miR-106a-5p
miR-384
miR-615-3p
miR-520b
miR-302a-3p
miR-6792-5p
miR-6776-3p
miR-4503
miR-146a-3p
miR-760
miR-363-5p
miR-6756-5p
miR-6766-5p
miR-6802-5p
miR-4483
miR-6815-5p
HOTTIP
miR-3613-3p
miR-122-5p
miR-3136-5p
miR-4439
VTRNA1-1
miR-320a
miR-1205
miR-1343-3p
mir-1244-1
miR-1281
mir-142
miR-671-5p
miR-3135b
miR-188-5p
mir-4655
miR-1276
miR-1183
mir-1255b-2
miR-3115
miR-3127-5p
miR-3157-5p
miR-632
mir-3130-2
miR-636
miR-3652
miR-617
mir-196a-1
mir-450b
CABIN1
miR-4440
miR-4511
miR-921
miR-591
mir-103a-1
miR-4729
miR-3651
mir-3202-2
miR-548l
miR-3610
miR-3124-5p
miR-556-5p
mir-7-1
DLG2
mir-3150a
miR-1293
miR-3939
miR-943
miR-4792
miR-3655
miR-1538
miR-652-3p
miR-4674
mir-4667
TFEB
mir-30c-1
miR-3908
MGST3
miR-4479
mir-320b-2
miR-4296
mir-3158-1
mir-4795
miR-643
miR-3944-3p
mir-26a-2
mir-4800
mir-4709
miR-4785
mir-103a-2
mir-550a-3
miR-4442
mir-624
miR-1539
mir-4677
miR-4523
mir-4738
miR-548q
mir-542
ITGB6
GRM8
SNORD125
DANCR
SNORA20
SSR4P1
LOC648987
SNORD73A
MIAT
ERVK3-1
GTSE1-AS1
SNORA24
LOC728730
SNORD100
SNORD4B
RNA5S16
SNORD96B
SNORA63
SNORD80
SNORD49A
LOC389641
RNVU1-14
HOTAIRM1
SNORA5C
SNHG1
SNORD103B
SNORA59A
SNORD47
SNORA21
FTX
LOC728752
SNORD54
SNORA53
LINC00337
SNORA3A
SNORD68
SCARNA5
SNHG9
SNORA52
SNORA25
SNORA50A
SNORA17B
HCG11
SNORD35B
SNORA77
MAPKAPK5-AS1
RNU4-1
SNORD71
LINC00652
LOC100288069
RNU6ATAC
NPCDR1
SNORA4
RNU7-1
SNORA75
SCARNA4
SNORD104
SNORD81
SNORD103C
SNORD105B
SNORA57
LOC389247
SNORD99
PAXBP1-AS1
SNORD50B
CIDECP
SNORD58B
SNORD36A
SNORD76
SNORD42A
SNORD96A
SNORD88A
SNORA30
SNORA71E
FLJ36777
LOC100289230
SNORD38B
SND1-IT1
SNORA50C
SNORA68
SNORD105
SNHG5
SNORD121A
SNORA65
SNORA70
SNORD48
SNORA9
SNORD78
SCARNA2
WWTR1-AS1
LINC00111
ARHGAP5-AS1
SNORA66
SNORD79
SNORA2A
PVRL3-AS1
SNORD66
SNORD46
SNORD34
SNORA74A
SNORD9
SNORA27
SNORD56
SNORD21
LOC100129617
SNORA35
SNORD14D
ZFAS1
FLJ42351
KLKP1
MINOS1P1
SNORA26
SNORD60
SNORA36C
SNORD63
RERG-IT1
XLOC_009911
SNORA13
MGC16025
SNORA69
SNORD36B
SCARNA12
CDKN2B-AS1
SCARNA1
SNORA3B
LOC93622
HCG14
WDFY3-AS2
SNORA70B
CASC2
LOC646903
miR-374b-3p
miR-548b-3p
miR-4758-5p
miR-1238-5p
miR-4665-5p
miR-599
miR-1237-5p
miR-6803-5p
miR-6822-3p
miR-8057
miR-8081
miR-5693
miR-4766-5p
miR-491-3p
miR-450a-2-3p
miR-5572
miR-6748-5p
miR-6759-5p
miR-516a-3p
miR-6834-3p
miR-4507
miR-3940-5p
miR-6839-3p
miR-187-5p
miR-382-3p
miR-5002-5p

## Sheet: dog
Table S6.ncRNA Driving the Pathogenic Module of Canine Hydatidosis
CRNDE
MALAT1
miR-155-5p
miR-17-5p
miR-181a-5p
miR-181c-5p
miR-20b-3p
miR-30d-5p
miR-324-3p
miR-4640-5p
miR-4722-3p
miR-4763-5p
miR-513a-5p
miR-526b-3p
miR-539-5p
miR-6727-3p
miR-6735-3p
miR-6878-3p
miR-8060
ANCR
let-7a-5p
let-7b-5p
let-7c-5p
let-7d-5p
let-7e-5p
let-7f-5p
let-7g-5p
let-7i-5p
miR-101-3p
miR-103a-3p
miR-106a-5p
miR-106b-5p
miR-1183
miR-1208
miR-122-5p
miR-1292-5p
miR-129-5p
miR-1297
miR-130a-3p
miR-130b-3p
miR-1324
miR-134-5p
miR-143-3p
miR-144-3p
miR-149-5p
miR-150-5p
miR-153-3p
miR-154-5p
miR-15a-5p
miR-181b-5p
miR-182-5p
miR-186-5p
miR-18a-5p
miR-18b-5p
miR-191-5p
miR-195-5p
miR-19a-3p
miR-200b-3p
miR-200c-3p
miR-203a-3p
miR-204-5p
miR-206
miR-208b-3p
miR-20a-5p
miR-20b-5p
miR-212-3p
miR-216a-5p
miR-218-5p
miR-221-3p
miR-23b-3p
miR-23c
miR-25-3p
miR-26a-5p
miR-27b-3p
miR-29b-3p
miR-301a-3p
miR-301b-3p
miR-302b-3p
miR-302d-3p
miR-302e
miR-30b-5p
miR-30e-5p
miR-3137
miR-31-5p
miR-320a
miR-320b
miR-335-5p
miR-33a-5p
miR-33b-5p
miR-34b-5p
miR-3529-5p
miR-3619-5p
miR-3646
MIR3650
miR-3653-5p
miR-3666
miR-3680-5p
miR-374a-5p
miR-374b-5p
miR-377-3p
miR-378a-3p
miR-410-3p
miR-422a
miR-424-5p
miR-425-5p
miR-4262
miR-429
miR-4295
miR-4306
miR-4429
miR-4465
miR-448
miR-449a
miR-452-3p
miR-452-5p
miR-4635
miR-4644
miR-4710
miR-4722-5p
miR-4760-5p
mir-4768
miR-4770
miR-4802-5p
miR-495-3p
miR-502-5p
miR-505-3p
miR-512-3p
miR-512-5p
miR-518c-5p
miR-519c-3p
miR-519d-3p
miR-520a-3p
miR-520b
miR-520c-3p
miR-520d-3p
miR-520f-3p
miR-5588-3p
miR-5590-3p
miR-579-3p
miR-590-3p
miR-646
miR-6504-3p
miR-653-3p
miR-6760-5p
miR-6826-3p
miR-6832-3p
miR-6856-5p
miR-6868-3p
miR-761
miR-766-3p
miR-8061
miR-890
miR-93-5p
mir-941-1
mir-941-3
mir-941-4
miR-9-5p
UCA1
